# Supplementary material for: Using a Chemical Genetic Screen to Enhance Our Understanding of the Antibacterial Properties of Silver
Source: PubMed Central journal article supplement (PMC6071238; doi:10.3390/genes9070344), 2018-07-06
Supplement: genes-09-00344-s001.pdf [file genes-09-00344-s001.pdf]

## Supplementary information

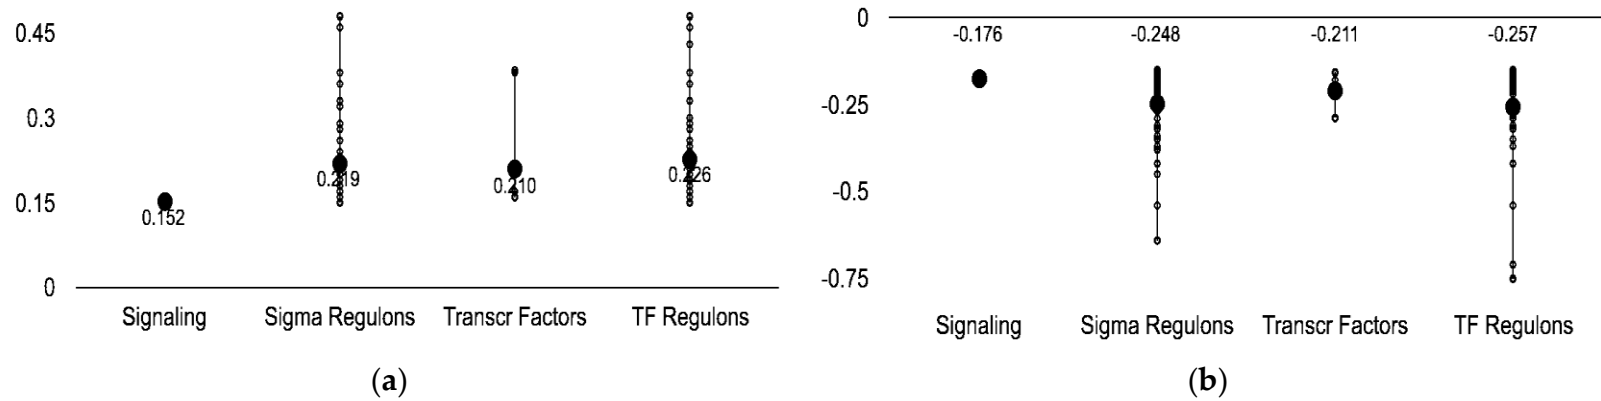

**Figure S1.** Resistant (a) and sensitive (b) gene scores plotted against subsystems involved in cell regulation. The small circles represent the individual hits and the large circles represent the mean of each subsystem. Each individual score signifies the mean of 12 trials – three biological and four technical. The *p*-value was calculated as a two-tailed *t*-test and significance was determined using the Benjamini-Hochberg procedure; false discovery rate was selected to be 0.1. Plots constructed using Pathway Tools, Omics Dashboard.



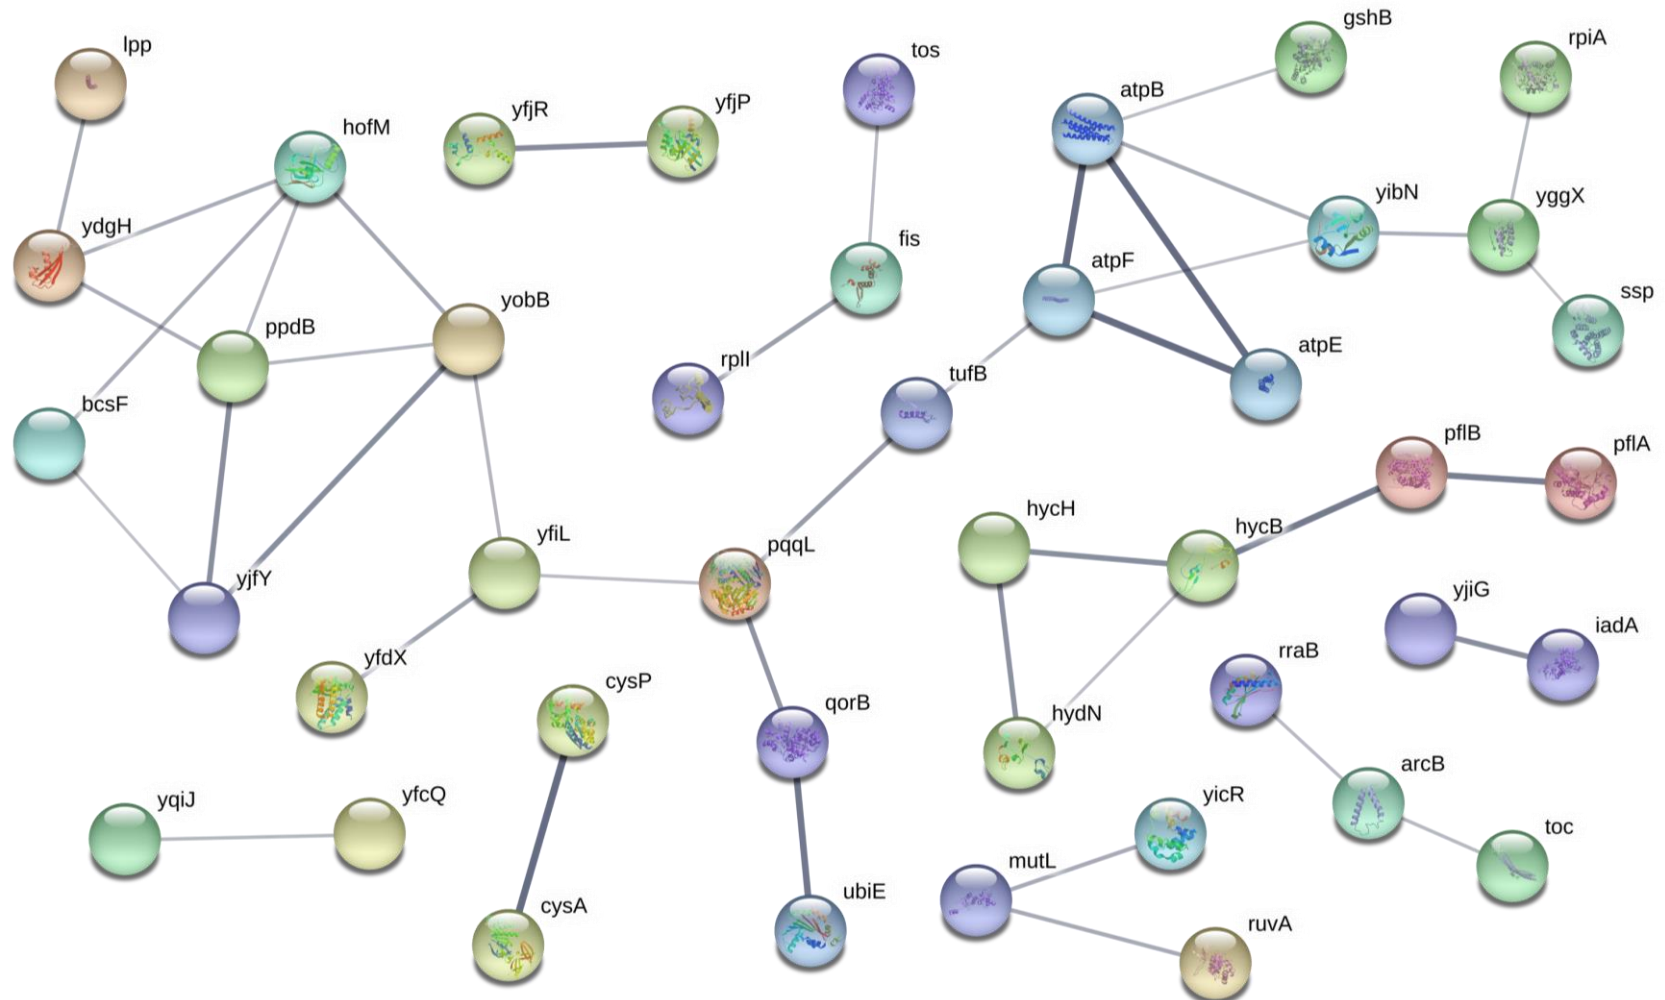

**Figure S3.** Connectivity map displaying the predicted functional associations between the silver-sensitive gene hits; disconnected gene hits not shown. The thicknesses of the lines indicate the degree of confidence prediction for the given interaction, based on fusion, co-occurrence, experimental and co-expression data. Figure produced using STRING (version 10.5) and a medium confidence score (approximate probability) of 0.4.

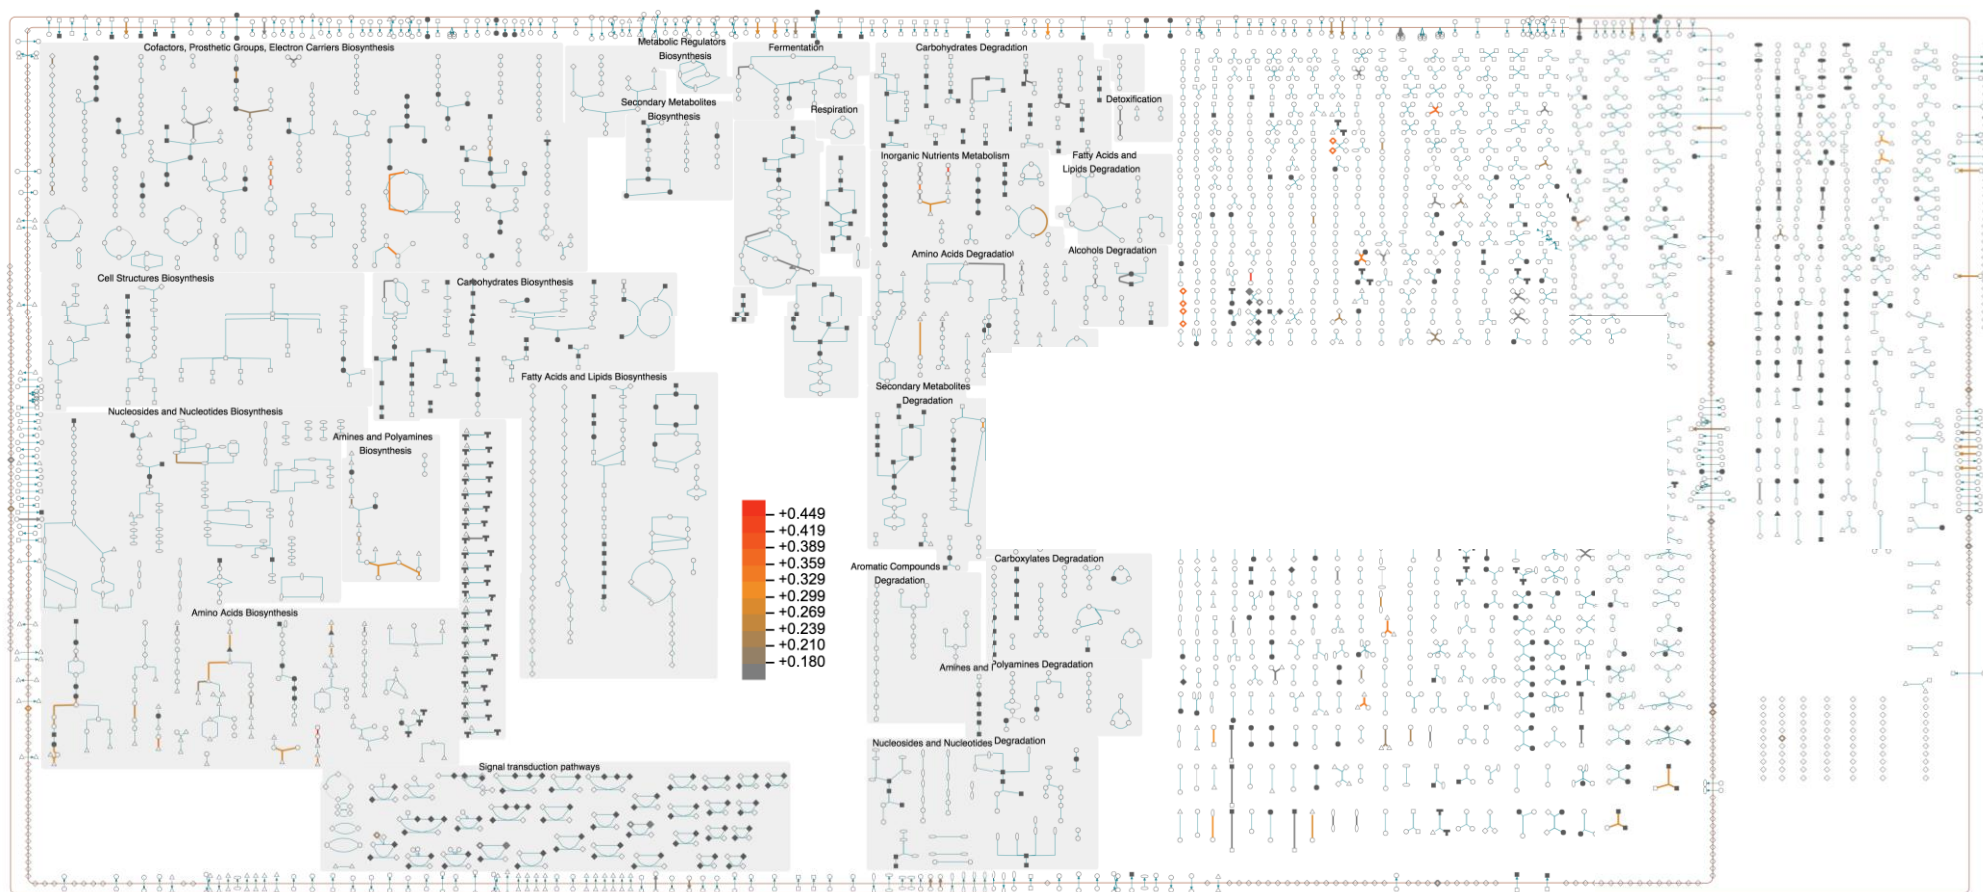

**Figure S4.** Metabolic overview of the pathways in *Escherichia coli*. The pathways involved in silver-resistance are coloured according to respective normalized score. Each individual score represents the mean of 12 trials – three biological and four technical. Amino acid – upward pointing triangle, carbohydrate – square, proteins – diamond, purines – vertical ellipse, cofactor – downward pointing triangle, tRNA – tee, and other – circle. Grey filled shapes represent phosphorylated metabolites.

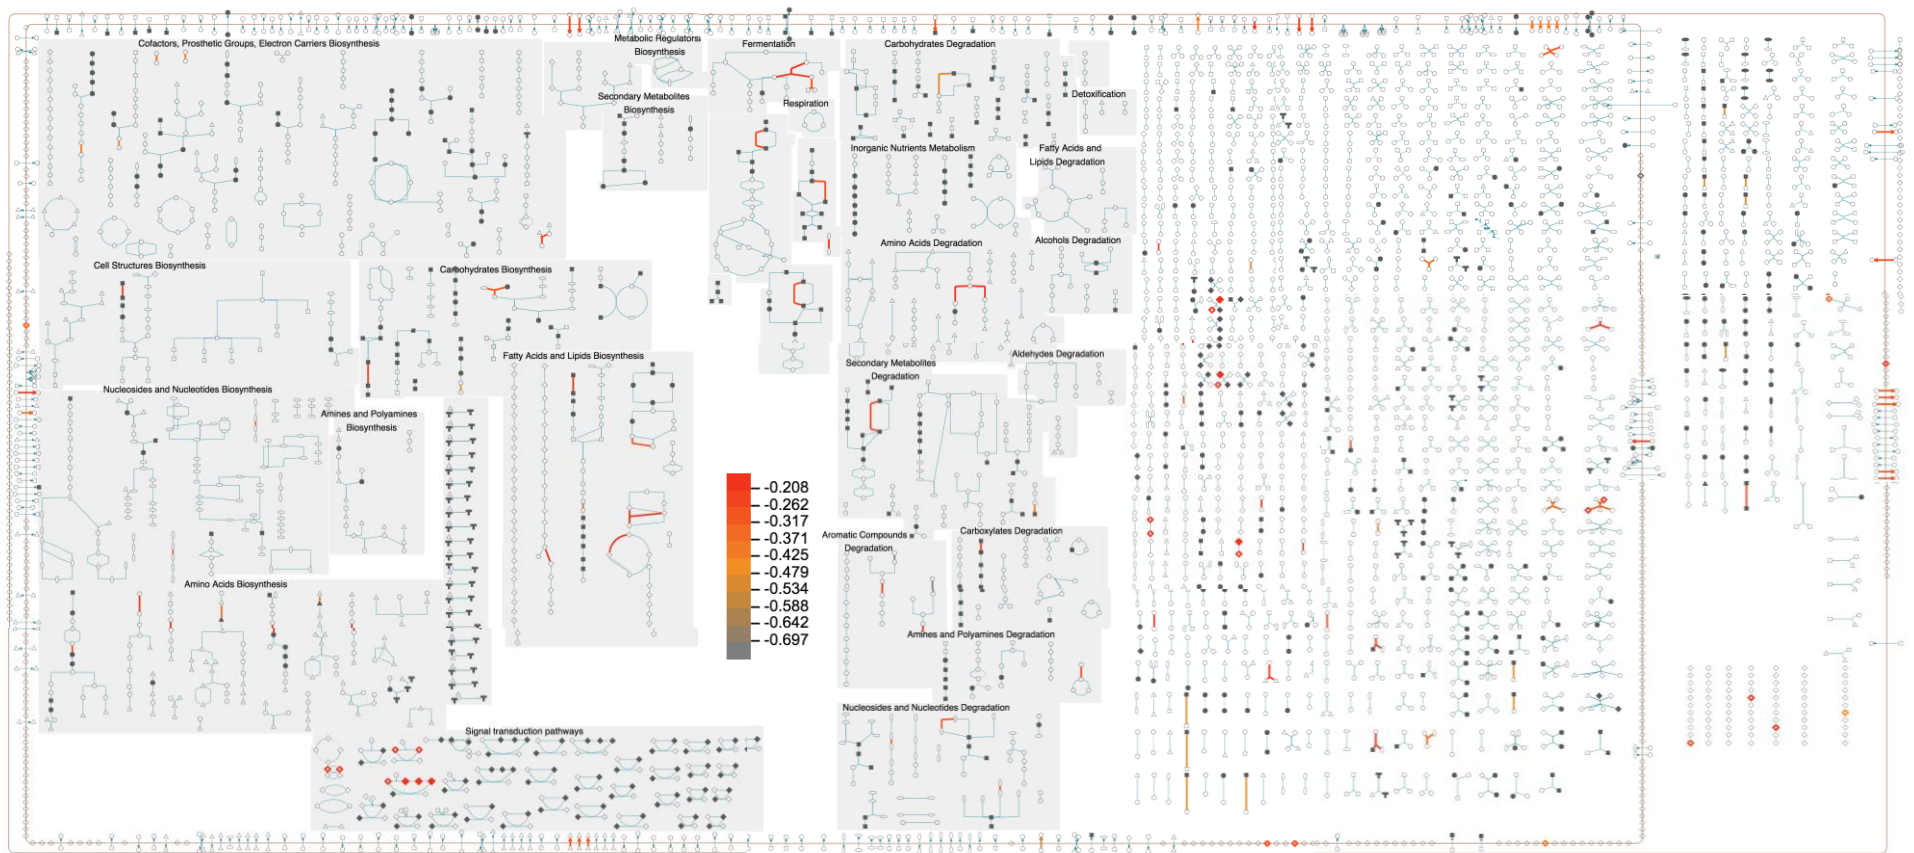

**Figure S5:** Metabolic overview of the pathways in *Escherichia coli*. The pathways involved in silver-sensitivity are coloured according to respective normalized score. Each individual score represents the mean of 12 trials – three biological and four technical. Amino acid – upward pointing triangle, carbohydrate – square, proteins – diamond, purines – vertical ellipse, cofactor – downward pointing triangle, tRNA – tee, and other – circle. Coloured shapes represent phosphorylated metabolites.

**Table S1.** Synthetic Array Tools (version 1.0) was used to normalize and score the silver-resistant and -sensitive gene hits as a means of representing the growth differences in *Escherichia coli* K12 BW25113 in the presence of 100 $\mu$ M silver nitrate. Genes with a normalized score <0 are implied as silver-sensitive and those with a score of >0 are silver-resistant hits.

| <b>ID</b> | <b>Name</b> | <b>Function<sup>1</sup></b>                                                   | <b>Score<sup>2</sup></b> | <b>P-value<sup>3</sup></b> |
|-----------|-------------|-------------------------------------------------------------------------------|--------------------------|----------------------------|
| JW0001    | thrA        | bifunctional aspartokinase/homoserine dehydrogenase 1                         | -0.0534                  | 0.2569                     |
| JW0002    | thrB        | homoserine kinase                                                             | -0.0004                  | 0.9944                     |
| JW0002    | thrB        | homoserine kinase                                                             | 0.2060                   | 0.0897                     |
| JW0003    | thrC        | L-threonine synthase                                                          | 0.1294                   | 0.0041                     |
| JW0004    | yaaX        | DUF2502 family putative periplasmic protein                                   | 0.0001                   | 0.9941                     |
| JW0005    | yaaA        | peroxide resistance protein, lowers intracellular iron                        | 0.0270                   | 0.0685                     |
| JW0006    | yaaJ        | putative transporter                                                          | 0.0901                   | 0.0002                     |
| JW0007    | talB        | transaldolase B                                                               | -0.1347                  | 0.0009                     |
| JW0008    | mog         | molybdochelataase incorporating molybdenum into molybdopterin                 | -0.0590                  | 0.0002                     |
| JW0009    | yaaH        | succinate-acetate transporter                                                 | 0.0493                   | 0.1511                     |
| JW0010    | yaaW        | UPF0174 family protein                                                        | 0.0270                   | 0.5107                     |
| JW0012    | yaaI        | UPF0412 family protein                                                        | 0.0007                   | 0.6916                     |
| JW0013    | dnaK        | chaperone Hsp70, with co-chaperone DnaJ                                       | 0.0990                   | 0.0028                     |
| JW0014    | dnaJ        | chaperone Hsp40, DnaK co-chaperone                                            | -0.1171                  | 0.0037                     |
| JW0018    | nhaA        | sodium-proton antiporter                                                      | -0.0472                  | 0.2963                     |
| JW0019    | nhaR        | transcriptional activator of nhaA                                             | -0.0016                  | 0.9484                     |
| JW0022    | rpsT        | 30S ribosomal subunit protein S20                                             | -0.0188                  | 0.5675                     |
| JW0024    | ileS        | isoleucyl-tRNA synthetase                                                     | 0.0301                   | 0.4161                     |
| JW0026    | fkpB        | FKBP-type peptidyl-prolyl cis-trans isomerase (rotamase)                      | -0.0763                  | 0.4062                     |
| JW0028    | rihC        | ribonucleoside hydrolase 3                                                    | 0.0220                   | 0.1171                     |
| JW0030    | carA        | carbamoyl phosphate synthetase small subunit, glutamine amidotransferase      | -0.0749                  | 0.0615                     |
| JW0031    | carB        | carbamoyl-phosphate synthase large subunit                                    | 0.0024                   | 0.9649                     |
| JW0033    | caiF        | cai operon transcriptional activator                                          | 0.0552                   | 0.2974                     |
| JW0035    | caiD        | carnitiny-CoA dehydratase                                                     | 0.0320                   | 0.1290                     |
| JW0036    | caiC        | putative crotonobetaine/carnitine-CoA ligase                                  | -0.2512                  | 0.0002                     |
| JW0037    | caiB        | crotonobetainyl CoA:carnitine CoA transferase                                 | -0.0480                  | 0.1644                     |
| JW0038    | caiA        | crotonobetaine reductase subunit II, FAD-binding                              | -0.0579                  | 0.1935                     |
| JW0039    | caiT        | putative transporter                                                          | 0.0146                   | 0.8119                     |
| JW0040    | fixA        | anaerobic carnitine reduction putative electron transfer flavoprotein subunit | 0.0458                   | 0.0029                     |
| JW0041    | fixB        | putative electron transfer flavoprotein, NAD/FAD-binding domain and ETFP      | 0.0915                   | 0.0037                     |

|        |      |                                                                                                                  |         |        |
|--------|------|------------------------------------------------------------------------------------------------------------------|---------|--------|
|        |      | adenine nucleotide-binding domain-like protein                                                                   |         |        |
| JW0042 | fixC | putative oxidoreductase                                                                                          | -0.0490 | 0.0303 |
| JW0043 | fixX | putative 4Fe-4S ferredoxin-type protein                                                                          | 0.0065  | 0.8522 |
| JW0044 | yaaU | putative MFS sugar transporter; membrane protein                                                                 | 0.1737  | 0.2868 |
| JW0045 | kefF | potassium-efflux system ancillary protein for KefC, glutathione-regulated; quinone oxidoreductase, FMN-dependent | -0.0352 | 0.3635 |
| JW0046 | kefC | potassium:proton antiporter                                                                                      | -0.0163 | 0.5461 |
| JW0048 | apaH | diadenosine tetraphosphatase                                                                                     | -0.1556 | 0.2481 |
| JW0049 | apaG | protein associated with Co <sup>2+</sup> and Mg <sup>2+</sup> efflux                                             | 0.0098  | 0.8831 |
| JW0050 | ksgA | 16S rRNA m(6)A1518, m(6)A1519 dimethyltransferase, SAM-dependent                                                 | 0.0648  | 0.0128 |
| JW0051 | pdxA | 4-hydroxy-L-threonine phosphate dehydrogenase, NAD-dependent                                                     | 0.2949  | 0.0557 |
| JW0052 | surA | peptidyl-prolyl cis-trans isomerase (PPIase)                                                                     | 0.0420  | 0.1053 |
| JW0054 | djlA | membrane-anchored DnaK co-chaperone, DNA-binding protein                                                         | 0.0149  | 0.3970 |
| JW0055 | yabP | pseudogene, pentapeptide repeats-containing                                                                      | -0.0133 | 0.6481 |
| JW0057 | rluA | dual specificity 23S rRNA pseudouridine(746), tRNA pseudouridine(32) synthase, SAM-dependent                     | -0.0156 | 0.5632 |
| JW0058 | hepA | RNA polymerase remodeling/recycling factor ATPase; RNA polymerase-associated, ATP-dependent RNA translocase      | -0.1693 | 0.0063 |
| JW0059 | polB | DNA polymerase II                                                                                                | 0.0069  | 0.8212 |
| JW0063 | araC | ara regulon transcriptional activator; autorepressor                                                             | -0.1094 | 0.0056 |
| JW0065 | thiQ | thiamine/thiamine pyrophosphate ABC transporter ATPase                                                           | -0.0575 | 0.0012 |
| JW0066 | thiP | thiamine/thiamine pyrophosphate ABC transporter permease                                                         | -0.0545 | 0.0856 |
| JW0067 | tbpA | thiamine/thiamine pyrophosphate/thiamine monophosphate ABC transporter periplasmic binding protein               | -0.0160 | 0.5373 |
| JW0068 | sgrR | transcriptional DNA-binding transcriptional activator of sgrS sRNA                                               | -0.0487 | 0.0562 |
| JW0069 | setA | broad specificity sugar efflux system                                                                            | -0.1094 | 0.3620 |
| JW0070 | leuD | 3-isopropylmalate dehydratase small subunit                                                                      | 0.0129  | 0.8362 |

|        |      |                                                                                                                                                                      |         |        |
|--------|------|----------------------------------------------------------------------------------------------------------------------------------------------------------------------|---------|--------|
| JW0071 | leuC | 3-isopropylmalate dehydratase large subunit                                                                                                                          | 0.1346  | 0.0024 |
| JW0073 | leuA | 2-isopropylmalate synthase                                                                                                                                           | -0.0199 | 0.5889 |
| JW0074 | leuL | leu operon leader peptide                                                                                                                                            | 0.0472  | 0.0718 |
| JW0075 | leuO | global transcription factor                                                                                                                                          | -0.1227 | 0.0001 |
| JW0076 | ilvI | acetolactate synthase 3 large subunit                                                                                                                                | -0.0103 | 0.6806 |
| JW0077 | ilvH | acetolactate synthase 3, small subunit, valine-sensitive                                                                                                             | -0.0073 | 0.7893 |
| JW0078 | fruR | transcriptional repressor-activator for carbon metabolism                                                                                                            | 0.0608  | 0.0029 |
| JW0079 | mraZ | RsmH methyltransferase inhibitor                                                                                                                                     | -0.0571 | 0.0421 |
| JW0080 | mraW | 16S rRNA m(4)C1402 methyltransferase, SAM-dependent                                                                                                                  | 0.0118  | 0.5659 |
| JW0090 | ddlB | D-alanine:D-alanine ligase                                                                                                                                           | 0.1386  | 0.0002 |
| JW0097 | mufT | dGTP-preferring nucleoside triphosphate pyrophosphohydrolase                                                                                                         | -0.1218 | 0.3731 |
| JW0099 | yacF | FtsZ stabilizer                                                                                                                                                      | 0.0615  | 0.0567 |
| JW0100 | coaE | dephospho-CoA kinase                                                                                                                                                 | -0.0409 | 0.0817 |
| JW0101 | guaC | GMP reductase                                                                                                                                                        | -0.1751 | 0.0434 |
| JW0102 | hofC | assembly protein in type IV pilin biogenesis, transmembrane protein                                                                                                  | -0.0395 | 0.1599 |
| JW0103 | hofB | T2SE secretion family protein; P-loop ATPase superfamily protein                                                                                                     | 0.0946  | 0.4871 |
| JW0104 | ppdD | putative prepilin peptidase-dependent pilin                                                                                                                          | 0.0023  | 0.9355 |
| JW0105 | nadC | quinolinate phosphoribosyltransferase                                                                                                                                | 0.4257  | 0.0000 |
| JW0106 | ampD | 1,6-anhydro-N-acetylmuramyl-L-alanine amidase, Zn-dependent; murein amidase                                                                                          | -0.0929 | 0.0752 |
| JW0107 | ampE | ampicillin resistance inner membrane protein; putative signaling protein in beta-lactamase regulation                                                                | 0.1436  | 0.0137 |
| JW0108 | aroP | aromatic amino acid transporter                                                                                                                                      | -0.3680 | 0.0491 |
| JW0109 | pdhR | pyruvate dehydrogenase complex repressor; autorepressor                                                                                                              | 0.0247  | 0.5738 |
| JW0110 | aceE | pyruvate dehydrogenase, decarboxylase component E1, thiamine triphosphate-binding                                                                                    | 0.0364  | 0.2135 |
| JW0111 | aceF | pyruvate dehydrogenase, dihydrolipoyltransacetylase component E2                                                                                                     | -0.0775 | 0.0140 |
| JW0112 | lpd  | dihydrolipoyl dehydrogenase; E3 component of pyruvate and 2-oxoglutarate dehydrogenases complexes; glycine cleavage system L protein; dihydrolipoamide dehydrogenase | 0.0103  | 0.5847 |
| JW0113 | yacH | DUF3300 family protein                                                                                                                                               | -0.0650 | 0.0010 |
| JW0114 | acnB | aconitate hydratase 2; aconitase B; 2-methyl-cis-aconitate hydratase                                                                                                 | 0.0361  | 0.0767 |
| JW0115 | yacL | UPF0231 family protein                                                                                                                                               | -0.0922 | 0.0144 |



|        |      |                                                                          |         |        |
|--------|------|--------------------------------------------------------------------------|---------|--------|
| JW0116 | speD | S-adenosylmethionine decarboxylase                                       | -0.1070 | 0.0060 |
| JW0117 | speE | spermidine synthase (putrescine aminopropyltransferase)                  | 0.2887  | 0.0469 |
| JW0118 | yacC | PulS_OutS family protein                                                 | 0.0084  | 0.6483 |
| JW0119 | cueO | multicopper oxidase (laccase)                                            | 0.0047  | 0.9004 |
| JW0120 | gcd  | glucose dehydrogenase                                                    | -0.0185 | 0.3599 |
| JW0123 | yadG | putative ABC transporter ATPase                                          | -0.1331 | 0.0230 |
| JW0124 | yadH | putative ABC transporter permease                                        | -0.1005 | 0.0054 |
| JW0125 | yadI | putative PTS Enzyme IIA                                                  | -0.0348 | 0.0541 |
| JW0126 | yadE | putative polysaccharide deacetylase lipoprotein                          | -0.0887 | 0.0027 |
| JW0127 | panD | aspartate 1-decarboxylase                                                | -0.0101 | 0.6568 |
| JW0129 | panC | pantothenate synthetase                                                  | -0.0502 | 0.1273 |
| JW0130 | panB | 3-methyl-2-oxobutanoate hydroxymethyltransferase                         | 0.0583  | 0.3930 |
| JW0131 | yadC | putative fimbrial-like adhesin protein                                   | -0.0327 | 0.1033 |
| JW0132 | yadK | putative fimbrial-like adhesin protein                                   | 0.0367  | 0.0809 |
| JW0133 | yadL | putative fimbrial-like adhesin protein                                   | -0.0162 | 0.6796 |
| JW0134 | yadM | putative fimbrial-like adhesin protein                                   | -0.0753 | 0.0018 |
| JW0135 | htrE | putative outer membrane usher protein                                    | 0.0501  | 0.3654 |
| JW0136 | ecpD | putative periplasmic pilin chaperone                                     | -0.0507 | 0.0669 |
| JW0137 | yadN | putative fimbrial-like adhesin protein                                   | -0.0434 | 0.0073 |
| JW0141 | dksA | transcriptional regulator of rRNA transcription; DnaK suppressor protein | 0.2042  | 0.0000 |
| JW0142 | sfsA | sugar fermentation stimulation protein A                                 | -0.0038 | 0.8051 |
| JW0144 | hrpB | putative ATP-dependent helicase                                          | 0.0979  | 0.0013 |
| JW0145 | mrcB | fused glycosyl transferase and transpeptidase                            | 0.0531  | 0.2187 |
| JW0146 | fhuA | ferrichrome outer membrane transporter                                   | 0.0975  | 0.0717 |
| JW0147 | fhuC | iron(3+)-hydroxamate import ABC transporter ATPase                       | 0.0345  | 0.5803 |
| JW0148 | fhuD | iron(3+)-hydroxamate import ABC transporter periplasmic binding protein  | 0.1716  | 0.0932 |
| JW0149 | fhuB | iron(3+)-hydroxamate import ABC transporter permease                     | -0.0543 | 0.0197 |
| JW0153 | yadS | UPF0126 family inner membrane protein                                    | -0.0261 | 0.3485 |
| JW0154 | btuF | vitamin B12 ABC transporter periplasmic binding protein                  | 0.2510  | 0.0302 |
| JW0155 | pfs  | 5'-methylthioadenosine/S-adenosylhomocysteine nucleosidase               | -0.1135 | 0.0708 |
| JW0156 | dgt  | deoxyguanosine triphosphate triphosphohydrolase                          | 0.0520  | 0.2579 |
| JW0157 | degP | serine endoprotease (protease Do), membrane-associated                   | 0.0178  | 0.6798 |
| JW0159 | yaeH | UPF0325 family protein                                                   | 0.0037  | 0.9642 |
| JW0162 | glnD | uridylyltransferase                                                      | -0.0338 | 0.4051 |
| JW0173 | hlpA | periplasmic chaperone                                                    | -0.0014 | 0.9697 |
| JW0178 | rnhB | ribonuclease HII, degrades RNA of DNA-RNA hybrids                        | 0.1380  | 0.0445 |

|        |      |                                                                                          |         |        |
|--------|------|------------------------------------------------------------------------------------------|---------|--------|
| JW0181 | ldcC | lysine decarboxylase 2, constitutive                                                     | 0.0670  | 0.1069 |
| JW0182 | yaeR | putative lyase                                                                           | 0.0754  | 0.0081 |
| JW0184 | rof  | modulator of Rho-dependent transcription termination                                     | 0.1987  | 0.0240 |
| JW0185 | yaeP | UPF0253 family protein                                                                   | -0.0043 | 0.8365 |
| JW0186 | yaeQ | PDDEXK superfamily protein                                                               | -0.0213 | 0.6030 |
| JW0187 | yaeJ | alternative stalled-ribosome rescue factor B; peptidyl-tRNA hydrolase, ribosome-attached | 0.0563  | 0.0672 |
| JW0188 | nlpE | lipoprotein involved with copper homeostasis and adhesion                                | 0.1925  | 0.0001 |
| JW0191 | yaeB | tRNA-Thr(GGU) m(6)t(6)A37 methyltransferase, SAM-dependent                               | 0.0251  | 0.0644 |
| JW0192 | rscF | putative outer membrane protein                                                          | 0.2090  | 0.0274 |
| JW0193 | metQ | DL-methionine transporter subunit                                                        | -0.0182 | 0.4503 |
| JW0194 | metI | DL-methionine transporter subunit                                                        | 0.0794  | 0.0550 |
| JW0195 | metN | DL-methionine transporter subunit                                                        | -0.0252 | 0.1474 |
| JW0196 | gmhB | D,D-heptose 1,7-bisphosphate phosphatase                                                 | -0.0254 | 0.2336 |
| JW0197 | dkgB | 2,5-diketo-D-gluconate reductase B                                                       | 0.0255  | 0.3856 |
| JW0198 | yafC | LysR family putative transcriptional regulator                                           | 0.0729  | 0.0198 |
| JW0200 | yafE | putative S-adenosyl-L-methionine-dependent methyltransferase                             | 0.0264  | 0.0283 |
| JW0202 | gloB | hydroxyacylglutathione hydrolase                                                         | 0.0063  | 0.9167 |
| JW0203 | yafS | putative S-adenosyl-L-methionine-dependent methyltransferase                             | 0.0942  | 0.0088 |
| JW0204 | rnhA | ribonuclease HI, degrades RNA of DNA-RNA hybrids                                         | -0.0282 | 0.4103 |
| JW0205 | dnaQ | DNA polymerase III epsilon subunit                                                       | 0.0311  | 0.4572 |
| JW0206 | yafT | lipoprotein                                                                              | -0.0481 | 0.3376 |
| JW0207 | yafU | pseudogene                                                                               | -0.0210 | 0.1397 |
| JW0210 | ivy  | inhibitor of c-type lysozyme, periplasmic                                                | -0.0022 | 0.0624 |
| JW0212 | lpcA | D-sedoheptulose 7-phosphate isomerase                                                    | -0.2942 | 0.0724 |
| JW0213 | yafJ | type 2 glutamine amidotransferase family protein                                         | 0.0620  | 0.0524 |
| JW0214 | yafK | L,D-transpeptidase-related protein                                                       | 0.0750  | 0.0021 |
| JW0215 | yafQ | mRNA interferase toxin of toxin-antitoxin pair YafQ/DinJ                                 | -0.0303 | 0.4339 |
| JW0216 | dinJ | antitoxin of YafQ-DinJ toxin-antitoxin system                                            | -0.0570 | 0.1064 |
| JW0217 | yafL | putative lipoprotein and C40 family peptidase                                            | -0.0215 | 0.4775 |
| JW0218 | yafM | RAYT REP element-mobilizing transposase; TnpA(REP)                                       | -0.0479 | 0.1852 |
| JW0221 | dinB | DNA polymerase IV                                                                        | -0.0101 | 0.6685 |
| JW0222 | yafN | antitoxin of the YafO-YafN toxin-antitoxin system                                        | 0.0263  | 0.2077 |
| JW0223 | yafO | mRNA interferase toxin of the YafO-YafN toxin-antitoxin system                           | -0.0151 | 0.5109 |
| JW0224 | yafP | GNAT family putative N-acetyltransferase                                                 | 0.0746  | 0.0120 |

|        |      |                                                                                                              |         |        |
|--------|------|--------------------------------------------------------------------------------------------------------------|---------|--------|
| JW0225 | ykfJ | pseudogene                                                                                                   | -0.0460 | 0.0504 |
| JW0227 | pepD | aminoacyl-histidine dipeptidase (peptidase D)                                                                | 0.0430  | 0.2061 |
| JW0228 | gpt  | xanthine phosphoribosyltransferase; xanthine-guanine phosphoribosyltransferase                               | 0.0168  | 0.3524 |
| JW0229 | frsA | fermentation-respiration switch protein; PTS Enzyme IIA(Glc)-binding protein; pNP-butyrate esterase activity | 0.0029  | 0.1212 |
| JW0230 | crI  | pseudogene, sigma factor-binding protein, RNA polymerase holoenzyme formation stimulator                     | -0.0159 | 0.4400 |
| JW0231 | phoE | outer membrane phosphoporin protein E                                                                        | 0.0559  | 0.2438 |
| JW0232 | proB | gamma-glutamate kinase                                                                                       | 0.1457  | 0.0420 |
| JW0233 | proA | gamma-glutamylphosphate reductase                                                                            | 0.0718  | 0.0208 |
| JW0234 | ykfI | CP4-6 prophage; toxin of the YkfI-YafW toxin-antitoxin system                                                | 0.0149  | 0.2332 |
| JW0235 | yafW | CP4-6 prophage; antitoxin of the YkfI-YafW toxin-antitoxin system                                            | 0.0195  | 0.5969 |
| JW0236 | ykfG | CP4-6 prophage; RadC-like JAB domain protein                                                                 | -0.0028 | 0.9444 |
| JW0239 | ykfB | CP4-6 prophage; uncharacterized protein                                                                      | 0.0306  | 0.3187 |
| JW0240 | yafY | lipoprotein, inner membrane; degP regulator; CP4-6 prophage                                                  | 0.0797  | 0.0465 |
| JW0242 | yafZ | CP4-6 prophage; conserved protein                                                                            | 0.0286  | 0.3941 |
| JW0243 | ykfA | CP4-6 prophage; putative GTP-binding protein                                                                 | 0.0014  | 0.9760 |
| JW0244 | perR | CP4-6 prophage; putative DNA-binding transcriptional regulator                                               | -0.1395 | 0.0365 |
| JW0247 | insO | 2-octaprenyl-3-methyl-6-methoxy-1,4-benzoquinol hydroxylase                                                  | 0.0033  | 0.9239 |
| JW0253 | mmuM | CP4-6 prophage; S-methylmethionine:homocysteine methyltransferase                                            | 0.0123  | 0.8598 |
| JW0254 | afuC | CP4-6 prophage; putative ferric transporter subunit                                                          | -0.0625 | 0.0038 |
| JW0255 | afuB | pseudogene, CP4-6 prophage; ferric iron ABC transporter permease gene fragment                               | 0.0146  | 0.3920 |
| JW0258 | ykgN | Heat shock protein 15                                                                                        | 0.0504  | 0.1257 |
| JW0259 | yagB | pseudogene, CP4-6 prophage                                                                                   | -0.0501 | 0.0551 |
| JW0260 | yagA | CP4-6 prophage; putative DNA-binding transcriptional regulator                                               | -0.0562 | 0.1147 |
| JW0261 | yagE | 2-keto-3-deoxy gluconate (KDG) aldolase; CP4-6 prophage                                                      | 0.0803  | 0.0662 |
| JW0264 | yagH | CP4-6 prophage; putative xylosidase/arabinoxylanase                                                          | 0.0205  | 0.3126 |
| JW0265 | yagI | CP4-6 prophage; putative DNA-binding transcriptional regulator                                               | -0.0267 | 0.1848 |
| JW0266 | argF | ornithine carbamoyltransferase 2, chain F; CP4-6 prophage                                                    | 0.1188  | 0.0003 |
| JW0270 | yagJ | CP4-6 prophage; uncharacterized protein                                                                      | 0.0073  | 0.7909 |

|        |      |                                                                                         |         |        |
|--------|------|-----------------------------------------------------------------------------------------|---------|--------|
| JW0271 | yagK | CP4-6 prophage; conserved protein                                                       | 0.0272  | 0.2190 |
| JW0272 | yagL | CP4-6 prophage; DNA-binding protein                                                     | -0.0266 | 0.2917 |
| JW0273 | yagM | CP4-6 prophage; uncharacterized protein                                                 | -0.0103 | 0.7524 |
| JW0275 | intF | CP4-6 prophage; putative phage integrase                                                | -0.0276 | 0.6062 |
| JW0276 | yagP | pseudogene, LysR family, fragment                                                       | 0.0501  | 0.0777 |
| JW0277 | yagQ | moco insertion factor for PaoABC aldehyde oxidoreductase                                | 0.0413  | 0.0844 |
| JW0278 | yagR | PaoABC aldehyde oxidoreductase, Moco-containing subunit                                 | 0.0338  | 0.0001 |
| JW0279 | yagS | PaoABC aldehyde oxidoreductase, FAD-containing subunit                                  | 0.0131  | 0.6245 |
| JW0280 | yagT | PaoABC aldehyde oxidoreductase, 2Fe-2S subunit                                          | 0.1139  | 0.0061 |
| JW0281 | yagU | DUF1440 family inner membrane acid resistance protein                                   | -0.0113 | 0.5426 |
| JW0282 | ykgJ | UPF0153 cysteine cluster protein                                                        | 0.0209  | 0.6844 |
| JW0284 | yagW | polymerized tip adhesin of ECP fibers                                                   | -0.0370 | 0.1930 |
| JW0285 | yagX | ECP production outer membrane protein                                                   | 0.0525  | 0.3218 |
| JW0286 | yagY | ECP production pilus chaperone                                                          | -0.0486 | 0.1318 |
| JW0287 | yagZ | ECP pilin                                                                               | -0.0368 | 0.0302 |
| JW0291 | eaeH | pseudogene, attaching and effacing protein homology                                     | -0.0137 | 0.4197 |
| JW0298 | ykgD | reactive chlorine species (RCS)-specific activator of the rcl genes                     | -0.0583 | 0.0082 |
| JW0300 | ykgF | ferridoxin-like LutB family protein; putative electron transport chain YkgEFG component | 0.0841  | 0.0378 |
| JW0302 | ykgH | putative inner membrane protein                                                         | -0.0007 | 0.9785 |
| JW0303 | betA | choline dehydrogenase, a flavoprotein                                                   | -0.0593 | 0.2727 |
| JW0305 | betI | choline-inducible betIBA-betT divergent operon transcriptional repressor                | 0.0694  | 0.0720 |
| JW0306 | betT | choline transporter of high affinity                                                    | -0.0694 | 0.0508 |
| JW0307 | yahA | c-di-GMP-specific phosphodiesterase                                                     | -0.0858 | 0.0018 |
| JW0308 | yahB | putative DNA-binding transcriptional regulator                                          | -0.0698 | 0.0251 |
| JW0309 | yahC | putative inner membrane protein                                                         | 0.0071  | 0.7466 |
| JW0310 | yahD | ankyrin repeat protein                                                                  | -0.0003 | 0.9927 |
| JW0311 | yahE | DUF2877 family protein                                                                  | -0.0451 | 0.1041 |
| JW0312 | yahF | putative NAD(P)-binding succinyl-CoA synthase                                           | 0.0580  | 0.0682 |
| JW0313 | yahG | DUF1116 family protein                                                                  | 0.0088  | 0.5659 |
| JW0315 | yahI | carbamate kinase-like protein                                                           | -0.0435 | 0.1041 |
| JW0316 | yahJ | putative metallo-dependent hydrolase domain deaminase                                   | 0.1698  | 0.0152 |
| JW0317 | yahK | broad specificity NADPH-dependent aldehyde reductase, Zn-containing                     | -0.0650 | 0.0114 |
| JW0318 | yahL | uncharacterized protein                                                                 | 0.0840  | 0.0001 |

|        |      |                                                                                   |         |        |
|--------|------|-----------------------------------------------------------------------------------|---------|--------|
| JW0320 | yahN | amino acid exporter for proline, lysine, glutamate, homoserine                    | 0.0533  | 0.1929 |
| JW0321 | yahO | periplasmic protein, function unknown, YhcN family                                | -0.0505 | 0.0401 |
| JW0322 | prpR | propionate catabolism operon regulatory protein                                   | -0.0447 | 0.0514 |
| JW0323 | prpB | 2-methylisocitrate lyase                                                          | -0.0166 | 0.8476 |
| JW0324 | prpC | 2-methylcitrate synthase                                                          | -0.0693 | 0.0017 |
| JW0325 | prpD | 2-methylcitrate dehydratase                                                       | -0.0239 | 0.4568 |
| JW0326 | prpE | propionate--CoA ligase                                                            | 0.0399  | 0.0191 |
| JW0327 | codB | cytosine transporter                                                              | -0.0054 | 0.9733 |
| JW0328 | codA | cytosine/isoguanine deaminase                                                     | 0.0726  | 0.0123 |
| JW0330 | cynT | carbonic anhydrase                                                                | -0.0940 | 0.0368 |
| JW0331 | cynS | cyanate aminohydrolase                                                            | 0.0108  | 0.7029 |
| JW0332 | cynX | putative cyanate transporter                                                      | -0.0478 | 0.1713 |
| JW0333 | lacA | thiogalactoside acetyltransferase                                                 | -0.0013 | 0.9685 |
| JW0334 | lacY | lactose permease                                                                  | 0.0006  | 0.1717 |
| JW0336 | lacI | lactose-inducible lac operon transcriptional repressor                            | -0.0393 | 0.0159 |
| JW0337 | mhpR | mhp operon transcriptional activator                                              | -0.0519 | 0.0165 |
| JW0338 | mhpA | 3-(3-hydroxyphenyl)propionate hydroxylase                                         | -0.0050 | 0.7709 |
| JW0339 | mhpB | 2,3-dihydroxyphenylpropionate 1,2-dioxygenase                                     | -0.0498 | 0.1851 |
| JW0340 | mhpC | 2-hydroxy-6-ketono-2,4-dienedioic acid hydrolase                                  | -0.1639 | 0.0030 |
| JW0341 | mhpD | 2-keto-4-pentenoate hydratase                                                     | 0.0628  | 0.5075 |
| JW0342 | mhpF | acetaldehyde-CoA dehydrogenase II, NAD-binding                                    | -0.0336 | 0.3631 |
| JW0343 | mhpE | 4-hydroxy-2-oxovalerate/4-hydroxy-2-oxopentanoic acid aldolase, class I           | -0.0151 | 0.4418 |
| JW0345 | yaiL | DUF2058 family protein                                                            | 0.0103  | 0.7899 |
| JW0346 | frmB | S-formylglutathione hydrolase                                                     | -0.0196 | 0.4250 |
| JW0347 | frmA | alcohol dehydrogenase class III; glutathione-dependent formaldehyde dehydrogenase | 0.0005  | 0.9841 |
| JW0348 | frmR | regulator protein that represses frmRAB operon                                    | -0.0098 | 0.5459 |
| JW0349 | yaiO | outer membrane protein                                                            | 0.0472  | 0.0763 |
| JW0350 | yaiX | pseudogene, interrupted by IS2A; hexapeptide transferase superfamily              | 0.0301  | 0.2087 |
| JW0355 | yaiP | putative family 2 glycosyltransferase                                             | 0.2036  | 0.0002 |
| JW0356 | yaiS | putative PIG-L family deacetylase                                                 | -0.0172 | 0.5996 |
| JW0357 | tauA | taurine ABC transporter periplasmic binding protein                               | 0.0637  | 0.1095 |
| JW0358 | tauB | taurine ABC transporter ATPase                                                    | -0.0476 | 0.2846 |
| JW0359 | tauC | taurine ABC transporter permease                                                  | 0.0273  | 0.7155 |
| JW0360 | tauD | taurine dioxygenase, 2-oxoglutarate-dependent                                     | 0.0486  | 0.1110 |
| JW0362 | yaiT | pseudogene, autotransporter family                                                | 0.0344  | 0.3312 |
| JW0366 | yaiV | putative transcriptional regulator                                                | 0.0133  | 0.6567 |
| JW0368 | sbmA | peptide antibiotic transporter                                                    | -0.1435 | 0.0001 |
| JW0369 | yaiW | microcin Bac7 uptake protein; outer membrane surface-exposed lipoprotein          | 0.0203  | 0.2387 |

|        |      |                                                                                                             |         |        |
|--------|------|-------------------------------------------------------------------------------------------------------------|---------|--------|
| JW0370 | yaiY | DUF2755 family inner membrane protein                                                                       | 0.0515  | 0.2744 |
| JW0372 | ddlA | D-alanine-D-alanine ligase A                                                                                | 0.0697  | 0.0792 |
| JW0373 | yaiB | anti-RssB factor, RpoS stabilizer during Pi starvation; anti-adapter protein                                | -0.0487 | 0.0062 |
| JW0374 | phoA | bacterial alkaline phosphatase                                                                              | -0.0604 | 0.1740 |
| JW0376 | yaiC | diguanylate cyclase, cellulose regualtor                                                                    | -0.0073 | 0.8053 |
| JW0377 | proC | pyrroline-5-carboxylate reductase, NAD(P)-binding                                                           | 0.3748  | 0.0005 |
| JW0378 | yaiI | UPF0178 family protein                                                                                      | 0.0491  | 0.0242 |
| JW0379 | aroL | shikimate kinase II                                                                                         | -0.2653 | 0.0162 |
| JW0380 | yaiA | OxyR-regulated conserved protein                                                                            | 0.0956  | 0.0418 |
| JW0381 | aroM | AroM family protein                                                                                         | -0.2024 | 0.2864 |
| JW0382 | yaiE | pyrimidine/purine nucleoside phosphorylase                                                                  | -0.0294 | 0.2841 |
| JW0383 | ykiA | pseudogene                                                                                                  | 0.1479  | 0.0002 |
| JW0385 | mak  | manno(fructo)kinase                                                                                         | -0.0084 | 0.6708 |
| JW0386 | araJ | L-arabinose-inducible putative transporter, MFS family                                                      | -0.0620 | 0.2381 |
| JW0387 | sbcC | exonuclease, dsDNA, ATP-dependent                                                                           | 0.1131  | 0.0292 |
| JW0388 | sbcD | exonuclease, dsDNA, ATP-dependent                                                                           | -0.0020 | 0.9391 |
| JW0389 | phoB | response regulator in two-component regulatory system with PhoR                                             | -0.0424 | 0.2103 |
| JW0390 | phoR | sensory histidine kinase in two-component regulatory system with PhoB                                       | -0.0250 | 0.4879 |
| JW0391 | brnQ | branched-chain amino acid transport system 2 carrier protein; LIV-II transport system for Ile, Leu, and Val | -0.0001 | 0.9954 |
| JW0393 | malZ | maltodextrin glucosidase                                                                                    | -0.0378 | 0.1931 |
| JW0394 | yajB | acyl carrier protein (ACP) phosphodiesterase; ACP hydrolyase                                                | 0.0228  | 0.0025 |
| JW0395 | queA | 5-adenosylmethionine:tRNA ribosyltransferase-isomerase                                                      | 0.1078  | 0.0746 |
| JW0396 | tgt  | tRNA-guanine transglycosylase                                                                               | 0.0113  | 0.8740 |
| JW0397 | yajC | SecYEG protein translocase auxillary subunit                                                                | -0.0460 | 0.2012 |
| JW0400 | yajD | HNH nuclease family protein                                                                                 | 0.0422  | 0.2165 |
| JW0401 | tsx  | nucleoside channel, receptor of phage T6 and colicin K                                                      | 0.0285  | 0.8230 |
| JW0403 | ybaD | Nrd regulon repressor                                                                                       | -0.0237 | 0.0144 |
| JW0406 | nusB | transcription antitermination protein                                                                       | -0.0005 | 0.9877 |
| JW0408 | pgpA | phosphatidylglycerophosphatase A                                                                            | 0.0033  | 0.9785 |
| JW0409 | yajO | 2-carboxybenzaldehyde reductase                                                                             | -0.0599 | 0.0860 |
| JW0412 | xseB | exonuclease VII small subunit                                                                               | 0.0922  | 0.0015 |
| JW0413 | thiI | tRNA s(4)U8 sulfurtransferase                                                                               | 0.1694  | 0.0286 |
| JW0415 | panE | 2-dehydropantoate reductase, NADPH-specific                                                                 | -0.0215 | 0.6088 |

|        |      |                                                                                      |         |        |
|--------|------|--------------------------------------------------------------------------------------|---------|--------|
| JW0418 | cyoE | protoheme IX farnesyltransferase                                                     | 0.1488  | 0.0131 |
| JW0419 | cyoD | cytochrome o ubiquinol oxidase subunit IV                                            | -0.0607 | 0.0053 |
| JW0420 | cyoC | cytochrome o ubiquinol oxidase subunit III                                           | 0.1647  | 0.0000 |
| JW0421 | cyoB | cytochrome o ubiquinol oxidase subunit I                                             | -0.1840 | 0.1237 |
| JW0422 | cyoA | cytochrome o ubiquinol oxidase subunit II                                            | -0.0480 | 0.2920 |
| JW0423 | ampG | muropeptide transporter                                                              | -0.0717 | 0.1260 |
| JW0424 | yajG | putative lipoprotein                                                                 | 0.0226  | 0.3448 |
| JW0426 | tig  | peptidyl-prolyl cis/trans isomerase (trigger factor)                                 | -0.0523 | 0.1749 |
| JW0427 | clpP | proteolytic subunit of ClpA-ClpP and ClpX-ClpP ATP-dependent serine proteases        | 0.0015  | 0.9782 |
| JW0428 | clpX | ATPase and specificity subunit of ClpX-ClpP ATP-dependent serine protease            | 0.0364  | 0.2136 |
| JW0430 | hupB | HU, DNA-binding transcriptional regulator, beta subunit                              | -0.1817 | 0.0015 |
| JW0431 | ppiD | periplasmic folding chaperone, has an inactive PPIase domain                         | 0.0288  | 0.5853 |
| JW0432 | ybaV | putative competence-suppressing periplasmic helix-hairpin-helix DNA-binding protein  | 0.0604  | 0.0573 |
| JW0433 | ybaW | long-chain acyl-CoA thioesterase III                                                 | 0.0417  | 0.1119 |
| JW0434 | ybaX | 7-cyano-7-deazaguanine (preQ0) synthase; queuosine biosynthesis                      | -0.0802 | 0.0040 |
| JW0435 | ybaE | putative ABC transporter periplasmic binding protein                                 | 0.0433  | 0.0345 |
| JW0436 | cof  | thiamine pyrimidine pyrophosphate hydrolase; HMP-PP phosphatase                      | -0.0300 | 0.1677 |
| JW0437 | ybaO | putative DNA-binding transcriptional regulator                                       | 0.0370  | 0.1508 |
| JW0438 | mdlA | putative multidrug ABC transporter ATPase                                            | 0.0493  | 0.0356 |
| JW0440 | glnK | nitrogen assimilation regulatory protein for GlnL, GlnE, and AmtB                    | -0.0048 | 0.8819 |
| JW0441 | amtB | ammonium transporter                                                                 | 0.0017  | 0.9535 |
| JW0442 | tesB | acyl-CoA thioesterase 2                                                              | -0.0544 | 0.4901 |
| JW0443 | ybaY | outer membrane lipoprotein                                                           | 0.0357  | 0.0788 |
| JW0444 | ybaZ | excision repair protein, alkyltransferase-like protein ATL                           | -0.0945 | 0.0688 |
| JW0445 | ybaA | DUF1428 family protein                                                               | 0.0593  | 0.1907 |
| JW0448 | maa  | maltose O-acetyltransferase                                                          | 0.1144  | 0.0009 |
| JW0449 | hha  | modulator of gene expression, with H-NS                                              | -0.0175 | 0.4444 |
| JW0450 | ybaJ | Hha toxicity attenuator; conjugation-related protein                                 | -0.0176 | 0.4032 |
| JW0451 | acrB | multidrug efflux system protein                                                      | 0.0360  | 0.3433 |
| JW0452 | acrA | multidrug efflux system                                                              | 0.0837  | 0.0030 |
| JW0453 | acrR | transcriptional repressor                                                            | 0.0517  | 0.0234 |
| JW0454 | kefA | mechanosensitive channel protein, intermediate conductance, K <sup>+</sup> regulated | -0.1327 | 0.0406 |

|        |      |                                                                                                   |         |        |
|--------|------|---------------------------------------------------------------------------------------------------|---------|--------|
| JW0454 | kefA | mechanosensitive channel protein, intermediate conductance, K <sup>+</sup> regulated              | 0.0282  | 0.5983 |
| JW0455 | ybaM | DUF2496 family protein                                                                            | 0.1587  | 0.0001 |
| JW0456 | priC | primosomal replication protein N"                                                                 | -0.0336 | 0.3113 |
| JW0457 | ybaN | DUF454 family inner membrane protein                                                              | 0.0317  | 0.1013 |
| JW0458 | apt  | adenine phosphoribosyltransferase                                                                 | -0.0455 | 0.1807 |
| JW0460 | ybaB | DNA-binding protein, putative nucleoid-associated protein                                         | -0.0570 | 0.0913 |
| JW0461 | recR | gap repair protein                                                                                | 0.1463  | 0.0011 |
| JW0462 | htpG | protein refolding molecular co-chaperone Hsp90, Hsp70-dependent; heat-shock protein; ATPase       | 0.0254  | 0.0743 |
| JW0465 | aes  | acetyl esterase                                                                                   | 0.1131  | 0.0502 |
| JW0466 | gsk  | inosine/guanosine kinase                                                                          | -0.0758 | 0.0414 |
| JW0467 | ybaL | inner membrane putative NAD(P)-binding transporter                                                | 0.0075  | 0.8085 |
| JW0468 | fsr  | putative fosmidomycin efflux system protein                                                       | -0.1783 | 0.1178 |
| JW0469 | ushA | bifunctional UDP-sugar hydrolase/5'-nucleotidase                                                  | -0.0554 | 0.0088 |
| JW0470 | ybaK | Cys-tRNA(Pro)/Cys-tRNA(Cys) deacylase                                                             | 0.0813  | 0.0006 |
| JW0471 | ybaP | TraB family protein                                                                               | 0.0369  | 0.1230 |
| JW0472 | ybaQ | putative DNA-binding transcriptional regulator                                                    | -0.0916 | 0.0043 |
| JW0473 | copA | copper transporter                                                                                | 0.0571  | 0.3965 |
| JW0474 | ybaS | glutaminase 1                                                                                     | -0.0180 | 0.3494 |
| JW0475 | ybaT | putative amino acid transporter                                                                   | -0.0642 | 0.1950 |
| JW0476 | cueR | copper-responsive regulon transcriptional regulator                                               | 0.0563  | 0.0609 |
| JW0478 | ybbK | PHB domain membrane-anchored putative protease                                                    | 0.1177  | 0.0013 |
| JW0479 | ybbL | iron export ABC transporter ATPase; peroxide resistance protein                                   | -0.1177 | 0.3360 |
| JW0482 | ybbO | short-chain dehydrogenases/reductases (SDR) family protein                                        | 0.0551  | 0.0356 |
| JW0483 | tesA | acyl-CoA thioesterase 1 and protease I and lysophospholipase L1                                   | -0.0862 | 0.0603 |
| JW0484 | ybbA | putative ABC transporter ATPase                                                                   | 0.0341  | 0.2921 |
| JW0485 | ybbP | putative ABC transporter permease                                                                 | -0.0355 | 0.1730 |
| JW0486 | rhsD | Rhs protein with DUF4329 family putative toxin domain; putative neighboring cell growth inhibitor | -0.0010 | 0.9642 |
| JW0487 | ybbC | putative immunity protein                                                                         | 0.0929  | 0.0003 |
| JW0488 | ylbH | pseudogene, Rhs family C-terminal fragment with unique putative toxin domain                      | 0.0047  | 0.8086 |



|        |      |                                                                                                            |         |        |
|--------|------|------------------------------------------------------------------------------------------------------------|---------|--------|
| JW0489 | ybbD | pseudogene                                                                                                 | 0.0673  | 0.0003 |
| JW0491 | ybbB | tRNA 2-selenouridine synthase, selenophosphate-dependent                                                   | 0.0189  | 0.2198 |
| JW0492 | ybbS | allD operon transcriptional activator                                                                      | -0.0515 | 0.0018 |
| JW0493 | allA | ureidoglycolate lyase, releasing urea                                                                      | 0.0619  | 0.0982 |
| JW0494 | allR | glyoxylate-inducible transcriptional repressor of all and gcl operons                                      | 0.0519  | 0.1331 |
| JW0495 | gcl  | glyoxylate carboligase                                                                                     | 0.0292  | 0.2641 |
| JW0496 | hyi  | hydroxypyruvate isomerase                                                                                  | -0.0420 | 0.0337 |
| JW0497 | glxR | tartronate semialdehyde reductase, NADH-dependent                                                          | -0.0508 | 0.4112 |
| JW0498 | ybbV | Uncharacterized protein                                                                                    | 0.0016  | 0.0161 |
| JW0499 | ybbW | putative allantoin transporter                                                                             | 0.1213  | 0.0170 |
| JW0500 | allB | allantoinase                                                                                               | -0.1142 | 0.0000 |
| JW0501 | ybbY | putative uracil/xanthine transporter                                                                       | 0.0009  | 0.9764 |
| JW0502 | glxK | glycerate kinase II                                                                                        | 0.0148  | 0.7942 |
| JW0503 | ylbA | S-ureidoglycine aminohydrolase                                                                             | -0.0486 | 0.0131 |
| JW0504 | allC | allantoate amidohydrolase                                                                                  | -0.0556 | 0.0126 |
| JW0505 | allD | ureidoglycolate dehydrogenase                                                                              | 0.0032  | 0.8113 |
| JW0506 | fdrA | putative NAD(P)-binding acyl-CoA synthetase                                                                | 0.0276  | 0.0465 |
| JW0508 | ylbE | Uncharacterized protein                                                                                    | 0.0322  | 0.1145 |
| JW0509 | ylbF | putative anaerobic allantoin catabolic oxamate carbamoyltransferase; DUF2877 family protein                | 0.0877  | 0.0041 |
| JW0510 | ybcF | putative carbonate kinase                                                                                  | 0.1383  | 0.0028 |
| JW0511 | purK | N5-carboxyaminoimidazole ribonucleotide synthase                                                           | 0.1136  | 0.0546 |
| JW0514 | ppiB | peptidyl-prolyl cis-trans isomerase B (rotamase B)                                                         | 0.0562  | 0.1558 |
| JW0516 | ybcI | DUF457 family inner membrane protein                                                                       | 0.0484  | 0.1625 |
| JW0519 | sfmA | FimA homolog, function unknown                                                                             | 0.0161  | 0.8679 |
| JW0520 | sfmC | putative periplasmic pilus chaperone                                                                       | 0.0103  | 0.8083 |
| JW0521 | sfmD | putative outer membrane export usher protein                                                               | -0.0568 | 0.0257 |
| JW0525 | intD | DLP12 prophage; putative phage integrase                                                                   | 0.0021  | 0.8737 |
| JW0526 | ybcC | pseudogene, DLP12 prophage; phage-type exonuclease family                                                  | -0.1281 | 0.2438 |
| JW0527 | ybcD | pseudogene; DLP12 prophage; replication protein family                                                     | -0.0170 | 0.5564 |
| JW0530 | renD | pseudogene, DLP12 prophage                                                                                 | 0.0125  | 0.5312 |
| JW0531 | emrE | DLP12 prophage; multidrug resistance protein                                                               | -0.0774 | 0.0180 |
| JW0532 | ybcK | DLP12 prophage; putative phage recombinase/integrase                                                       | -0.0136 | 0.7690 |
| JW0533 | ybcL | DLP12 prophage; inactive polymorphonuclear leukocyte migration suppressor; UPF0098 family secreted protein | 0.0463  | 0.0251 |
| JW0534 | ybcM | DLP12 prophage; putative DNA-binding transcriptional regulator                                             | 0.1393  | 0.0054 |

|        |      |                                                                               |         |        |
|--------|------|-------------------------------------------------------------------------------|---------|--------|
| JW0535 | ybcN | DLP12 prophage; SSB and ssDNA binding protein; putative recombination protein | 0.0255  | 0.1652 |
| JW0536 | ninE | DLP12 prophage; conserved protein                                             | -0.0225 | 0.2634 |
| JW0537 | ybcO | DLP12 prophage; DUF1364 family protein                                        | -0.0056 | 0.7531 |
| JW0538 | rusA | DLP12 prophage; endonuclease RUS                                              | 0.0473  | 0.0183 |
| JW0539 | ybcQ | DLP12 prophage; putative antitermination protein                              | 0.0851  | 0.0846 |
| JW0543 | essD | DLP12 prophage; putative phage lysis protein                                  | -0.0081 | 0.7490 |
| JW0544 | ybcS | DLP12 prophage; putative lysozyme                                             | -0.0101 | 0.7355 |
| JW0546 | borD | DLP12 prophage; putative lipoprotein                                          | -0.0589 | 0.0141 |
| JW0548 | ybcW | DLP12 prophage; uncharacterized protein                                       | 0.1560  | 0.0925 |
| JW0549 | nohB | DLP12 prophage; DNA packaging protein                                         | -0.0738 | 0.1384 |
| JW0551 | ybcY | pseudogene, DLP12 prophage; methyltransferase homology                        | -0.0504 | 0.0207 |
| JW0552 | ylcE | pseudogene, DLP12 prophage                                                    | 0.0389  | 0.2172 |
| JW0553 | appY | global transcriptional activator; DLP12 prophage                              | -0.0189 | 0.2124 |
| JW0554 | ompT | DLP12 prophage; outer membrane protease VII; outer membrane protein 3b        | -0.0187 | 0.6659 |
| JW0555 | envY | porin thermoregulatory transcriptional activator                              | -0.0212 | 0.1416 |
| JW0556 | ybcH | PRK09936 family protein                                                       | 0.0060  | 0.7827 |
| JW0557 | nfrA | bacteriophage N4 receptor, outer membrane subunit                             | 0.0660  | 0.0064 |
| JW0558 | nfrB | bacteriophage N4 receptor, inner membrane subunit                             | 0.0660  | 0.0618 |
| JW0560 | cusR | response regulator in two-component regulatory system with CusS               | 0.0009  | 0.9580 |
| JW0561 | cusC | copper/silver efflux system, outer membrane component                         | 0.0121  | 0.5290 |
| JW0562 | cusF | periplasmic copper- and silver-binding protein                                | 0.0166  | 0.4669 |
| JW0563 | cusB | copper/silver efflux system, membrane fusion protein                          | -0.4172 | 0.0001 |
| JW0564 | cusA | copper/silver efflux system, membrane component                               | 0.0280  | 0.2991 |
| JW0565 | pheP | phenylalanine transporter                                                     | 0.0241  | 0.2099 |
| JW0566 | ybdG | mechanosensitive channel protein, miniconductance                             | -0.0138 | 0.2492 |
| JW0567 | nfnB | dihydropteridine reductase, NAD(P)H-dependent, oxygen-insensitive             | -0.1839 | 0.0058 |
| JW0569 | ybdJ | DUF1158 family putative inner membrane protein                                | -0.0013 | 0.9596 |
| JW0570 | ybdK | weak gamma-glutamyl:cysteine ligase                                           | 0.0509  | 0.0418 |
| JW0576 | fes  | enterobactin/ferrienterobactin esterase                                       | -0.1243 | 0.2965 |

|        |      |                                                                                                   |         |        |
|--------|------|---------------------------------------------------------------------------------------------------|---------|--------|
| JW0577 | ybdZ | stimulator of EntF adenylation activity, MbtH-like                                                | 0.0072  | 0.7795 |
| JW0578 | entF | enterobactin synthase multienzyme complex component, ATP-dependent                                | 0.0064  | 0.9007 |
| JW0579 | fepE | regulator of length of O-antigen component of lipopolysaccharide chains                           | -0.0952 | 0.0261 |
| JW0580 | fepC | ferrienterobactin ABC transporter ATPase                                                          | -0.0089 | 0.8604 |
| JW0581 | fepG | iron-enterobactin ABC transporter permease                                                        | 0.1056  | 0.0108 |
| JW0582 | fepD | ferrienterobactin ABC transporter permease                                                        | 0.0458  | 0.0086 |
| JW0583 | ybdA | enterobactin exporter, iron-regulated                                                             | 0.1033  | 0.0465 |
| JW0584 | fepB | ferrienterobactin ABC transporter periplasmic binding protein                                     | 0.0275  | 0.6959 |
| JW0585 | entC | isochorismate synthase 1                                                                          | 0.0425  | 0.2846 |
| JW0586 | entE | 2,3-dihydroxybenzoate-AMP ligase component of enterobactin synthase multienzyme complex           | 0.0863  | 0.1707 |
| JW0587 | entB | isochorismatase                                                                                   | -0.0660 | 0.0535 |
| JW0588 | entA | 2,3-dihydro-2,3-dihydroxybenzoate dehydrogenase                                                   | -0.0259 | 0.3035 |
| JW0589 | ybdB | enterobactin synthesis proofreading thioesterase                                                  | -0.0111 | 0.5167 |
| JW0590 | cstA | carbon starvation protein involved in peptide utilization; APC peptide transporter family protein | -0.1690 | 0.0000 |
| JW0591 | ybdD | DUF466 family protein                                                                             | 0.0021  | 0.9183 |
| JW0592 | ybdH | hydroxycarboxylate dehydrogenase A                                                                | 0.0244  | 0.4360 |
| JW0594 | ybdM | Spo0J family protein, ParB-like nuclease domain                                                   | -0.0235 | 0.0390 |
| JW0595 | ybdN | PAPS reductase-like domain protein                                                                | 0.0076  | 0.6894 |
| JW0596 | ybdO | putative DNA-binding transcriptional regulator                                                    | 0.0365  | 0.0207 |
| JW0597 | dsbG | thiol:disulfide interchange protein, periplasmic                                                  | -0.1461 | 0.0001 |
| JW0598 | ahpC | alkyl hydroperoxide reductase, C22 subunit                                                        | 0.0160  | 0.5950 |
| JW0599 | ahpF | alkyl hydroperoxide reductase, F52a subunit, FAD/NAD(P)-binding                                   | 0.4632  | 0.0078 |
| JW0600 | uspG | universal stress protein UP12                                                                     | -0.0606 | 0.0115 |
| JW0601 | ybdR | uncharacterized zinc-type alcohol dehydrogenase-like protein                                      | 0.0638  | 0.3428 |
| JW0602 | rnk  | regulator of nucleoside diphosphate kinase                                                        | 0.0222  | 0.4438 |
| JW0603 | rna  | ribonuclease I                                                                                    | -0.0556 | 0.0300 |
| JW0604 | citT | citrate/succinate antiporter; citrate carrier                                                     | -0.0127 | 0.6205 |
| JW0605 | citG | 2-(5"-triphosphoribosyl)-3'-dephosphocoenzyme-A synthase                                          | 0.0536  | 0.0384 |
| JW0606 | citX | apo-citrate lyase phosphoribosyl-dephospho-CoA transferase                                        | -0.0158 | 0.6582 |

|        |      |                                                                                                                                                            |         |        |
|--------|------|------------------------------------------------------------------------------------------------------------------------------------------------------------|---------|--------|
| JW0608 | citE | citrate lyase, citryl-ACP lyase (beta) subunit                                                                                                             | 0.0009  | 0.9637 |
| JW0609 | citD | citrate lyase, acyl carrier (gamma) subunit                                                                                                                | 0.0214  | 0.1721 |
| JW0610 | citC | citrate lyase ligase; [citrate [pro-3S]-lyase] ligase                                                                                                      | -0.0414 | 0.2016 |
| JW0611 | citA | sensory histidine kinase in two-component regulatory system with CitB                                                                                      | -0.0912 | 0.2057 |
| JW0612 | citB | response regulator in two-component regulatory system with CitA                                                                                            | -0.0071 | 0.7523 |
| JW0613 | dcuC | Anaerobic C4-dicarboxylate transporter                                                                                                                     | 0.0072  | 0.8311 |
| JW0617 | crcA | phospholipid:lipid A palmitoyltransferase                                                                                                                  | -0.0339 | 0.2120 |
| JW0618 | cspE | constitutive cold shock family transcription antitermination protein; negative regulator of cspA transcription; RNA melting protein; ssDNA-binding protein | -0.0278 | 0.2150 |
| JW0619 | crcB | fluoride efflux channel, dual topology membrane protein                                                                                                    | 0.0541  | 0.2072 |
| JW0621 | ybeM | Deaminated glutathione amidase                                                                                                                             | -0.1488 | 0.0024 |
| JW0622 | tatE | TatABCE protein translocation system subunit                                                                                                               | 0.0061  | 0.8393 |
| JW0623 | lipA | lipoyl synthase                                                                                                                                            | 0.0205  | 0.7960 |
| JW0624 | ybeF | LysR family putative transcriptional regulator                                                                                                             | 0.1445  | 0.0811 |
| JW0626 | ybeD | UPF0250 family protein                                                                                                                                     | -0.2877 | 0.0305 |
| JW0628 | rlpA | septal ring protein, suppressor of prc, minor lipoprotein                                                                                                  | 0.0321  | 0.5482 |
| JW0631 | ybeA | 23S rRNA m(3)Psi1915 pseudouridine methyltransferase, SAM-dependent                                                                                        | 0.0559  | 0.0204 |
| JW0633 | cobC | putative alpha-ribazole-5'-P phosphatase                                                                                                                   | -0.1093 | 0.3467 |
| JW0638 | ybeL | DUF1451 family protein                                                                                                                                     | -0.0385 | 0.0907 |
| JW0640 | ybeR | DUF1266 family protein                                                                                                                                     | -0.1019 | 0.0001 |
| JW0641 | djlB | putative HscC co-chaperone, uncharacterized J domain-containing protein                                                                                    | 0.0190  | 0.3005 |
| JW0642 | ybeT | Sel1 family TPR-like repeat protein                                                                                                                        | -0.0348 | 0.0965 |
| JW0643 | ybeU | DUF1266 family protein                                                                                                                                     | -0.0378 | 0.1455 |
| JW0644 | djlC | J domain-containing HscC co-chaperone; Hsc56                                                                                                               | 0.0171  | 0.7258 |
| JW0645 | hscC | Hsp70 family chaperone Hsc62; RpoD-binding transcription inhibitor                                                                                         | 0.0054  | 0.9279 |
| JW0646 | rihA | ribonucleoside hydrolase 1                                                                                                                                 | -0.0649 | 0.1094 |
| JW0647 | gltL | glutamate/aspartate ABC transporter ATPase                                                                                                                 | -0.0257 | 0.4969 |
| JW0648 | gltK | glutamate/aspartate ABC transporter permease                                                                                                               | -0.0897 | 0.0269 |
| JW0649 | gltJ | glutamate/aspartate ABC transporter permease                                                                                                               | -0.0596 | 0.0225 |

|        |      |                                                                                                                                                                     |         |        |
|--------|------|---------------------------------------------------------------------------------------------------------------------------------------------------------------------|---------|--------|
| JW0655 | ybeX | putative ion transport                                                                                                                                              | -0.1587 | 0.0432 |
| JW0656 | ybeY | ssRNA-specific endoribonuclease; 16S rRNA 3' end maturation and quality control co-endoribonuclease working with RNase R; rRNA transcription antitermination factor | -0.4173 | 0.0073 |
| JW0657 | ybeZ | heat shock protein, putative NTPase; PhoH-like protein                                                                                                              | 0.0069  | 0.6671 |
| JW0658 | miaB | tRNA-i(6)A37 methylthiotransferase                                                                                                                                  | -0.0329 | 0.0725 |
| JW0659 | ubiF | 2-octaprenyl-3-methyl-6-methoxy-1,4-benzoquinol oxygenase                                                                                                           | 0.0471  | 0.2975 |
| JW0660 | asnB | asparagine synthetase B                                                                                                                                             | 0.0639  | 0.0136 |
| JW0661 | nagD | UMP phosphatase                                                                                                                                                     | -0.0773 | 0.0687 |
| JW0662 | nagC | N-acetylglucosamine-inducible nag divergent operon transcriptional repressor                                                                                        | -0.0368 | 0.1139 |
| JW0663 | nagA | N-acetylglucosamine-6-phosphate deacetylase                                                                                                                         | -0.0545 | 0.1045 |
| JW0664 | nagB | glucosamine-6-phosphate deaminase                                                                                                                                   | -0.0627 | 0.1224 |
| JW0665 | nagE | N-acetyl glucosamine specific PTS enzyme IIC, IIB, and IIA components                                                                                               | -0.0391 | 0.0869 |
| JW0667 | ybfM | chitoporin, uptake of chitosugars                                                                                                                                   | 0.0184  | 0.6284 |
| JW0668 | ybfN | chitosugar-induced verified lipoprotein                                                                                                                             | 0.0272  | 0.4800 |
| JW0669 | fur  | ferric iron uptake regulon transcriptional repressor; autorepressor                                                                                                 | -0.0007 | 0.9637 |
| JW0673 | ybfF | acyl-CoA esterase                                                                                                                                                   | 0.0172  | 0.2757 |
| JW0674 | seqA | negative modulator of initiation of replication                                                                                                                     | 0.1028  | 0.0425 |
| JW0675 | pgm  | phosphoglucomutase                                                                                                                                                  | 0.0198  | 0.3650 |
| JW0676 | ybfP | lipoprotein                                                                                                                                                         | 0.0422  | 0.0101 |
| JW0679 | potE | putrescine/proton symporter: putrescine/ornithine antiporter                                                                                                        | -0.0681 | 0.0790 |
| JW0680 | speF | ornithine decarboxylase isozyme, inducible fused sensory histidine kinase in two-                                                                                   | 0.0675  | 0.0803 |
| JW0683 | kdpD | component regulatory system with KdpE: signal sensing protein                                                                                                       | 0.1680  | 0.0401 |
| JW0684 | kdpC | potassium translocating ATPase, subunit C                                                                                                                           | -0.1064 | 0.2469 |
| JW0685 | kdpB | potassium translocating ATPase, subunit B                                                                                                                           | 0.0046  | 0.8027 |
| JW0686 | kdpA | potassium translocating ATPase, subunit A                                                                                                                           | -0.0379 | 0.1112 |
| JW0687 | kdpF | potassium ion accessory transporter subunit                                                                                                                         | 0.0340  | 0.2686 |
| JW0688 | ybfA | DUF2517 family protein                                                                                                                                              | -0.0628 | 0.0845 |
| JW0689 | rhsC | Rhs protein with putative toxin domain; putative neighboring cell growth inhibitor                                                                                  | -0.0503 | 0.2442 |
| JW0691 | ybfB | putative membrane protein                                                                                                                                           | -0.0356 | 0.1796 |
| JW0692 | ybfO | pseudogene, Rhs family                                                                                                                                              | -0.0125 | 0.6588 |

|        |      |                                                                                                  |         |        |
|--------|------|--------------------------------------------------------------------------------------------------|---------|--------|
| JW0693 | ybfC | putative secreted protein                                                                        | 0.0098  | 0.4317 |
| JW0694 | ybfQ | Putative defective transposase                                                                   | 0.0531  | 0.0856 |
| JW0695 | ybfL | pseudogene, DDE domain transposase family                                                        | 0.0662  | 0.1256 |
| JW0696 | ybfD | H repeat-associated putative transposase                                                         | -0.0583 | 0.0451 |
| JW0697 | ybgA | DUF1722 family protein                                                                           | 0.0042  | 0.8710 |
| JW0698 | phr  | deoxyribodipyrimidine photolyase, FAD-binding                                                    | -0.1874 | 0.1171 |
| JW0699 | ybgH | dipeptide and tripeptide permease D                                                              | 0.0291  | 0.2222 |
| JW0700 | ybgI | GTP cyclohydrolase-like radiation resistance protein; metal-binding                              | 0.0276  | 0.5652 |
| JW0701 | ybgJ | putative allophanate hydrolase, subunit 1                                                        | 0.1015  | 0.0025 |
| JW0702 | ybgK | putative allophanate hydrolase, subunit 2                                                        | -0.0545 | 0.0416 |
| JW0703 | ybgL | UPF0271 family protein                                                                           | 0.0078  | 0.7737 |
| JW0704 | nei  | endonuclease VIII and 5-formyluracil/5-hydroxymethyluracil DNA glycosylase                       | -0.0675 | 0.2148 |
| JW0707 | ybgP | putative periplasmic pilin chaperone                                                             | 0.0060  | 0.8791 |
| JW0709 | ybgD | putative fimbrial-like adhesin protein                                                           | -0.0946 | 0.0010 |
| JW0710 | gltA | citrate synthase                                                                                 | 0.1277  | 0.0885 |
| JW0711 | sdhC | succinate dehydrogenase, membrane subunit, binds cytochrome b556                                 | -0.0043 | 0.7547 |
| JW0712 | sdhD | succinate dehydrogenase, membrane subunit, binds cytochrome b556                                 | 0.0652  | 0.0902 |
| JW0713 | sdhA | succinate dehydrogenase, flavoprotein subunit                                                    | 0.0870  | 0.0198 |
| JW0714 | sdhB | succinate dehydrogenase, FeS subunit                                                             | -0.0289 | 0.1476 |
| JW0715 | sucA | 2-oxoglutarate decarboxylase, thiamine triphosphate-binding                                      | -0.0290 | 0.7699 |
| JW0716 | sucB | dihydrolipoyl succinyltransferase, subunit of 2-oxoglutarate dehydrogenase                       | 0.1171  | 0.0004 |
| JW0717 | sucC | succinyl-CoA synthetase, beta subunit                                                            | 0.0562  | 0.1679 |
| JW0718 | sucD | succinyl-CoA synthetase, NAD(P)-binding, alpha subunit                                           | 0.1277  | 0.0347 |
| JW0719 | mngR | transcriptional repressor for the mannosyl-D-glycerate catabolic operon                          | -0.1341 | 0.0057 |
| JW0720 | mngA | fused 2-O-a-mannosyl-D-glycerate specific PTS enzymes: IIA component/IIB component/IIC component | 0.3256  | 0.0035 |
| JW0721 | mngB | alpha-mannosidase                                                                                | -0.0134 | 0.4323 |
| JW0723 | cydB | cytochrome d terminal oxidase, subunit II                                                        | 0.0072  | 0.6653 |
| JW0724 | ybgT | cytochrome d (bd-I) ubiquinol oxidase subunit X                                                  | 0.0676  | 0.0126 |
| JW0725 | ybgE | putative inner membrane protein in cydABX-ybgE operon                                            | -0.0312 | 0.1127 |

|        |      |                                                                                  |         |        |
|--------|------|----------------------------------------------------------------------------------|---------|--------|
| JW0726 | ybgC | acyl-CoA thioester hydrolase                                                     | -0.1118 | 0.0342 |
| JW0727 | tolQ | membrane spanning protein in TolA-TolQ-TolR complex                              | 0.1215  | 0.0001 |
| JW0728 | tolR | membrane spanning protein in TolA-TolQ-TolR complex                              | -0.1620 | 0.1417 |
| JW0729 | tolA | membrane anchored protein in TolA-TolQ-TolR complex                              | 0.0992  | 0.0003 |
| JW0731 | pal  | peptidoglycan-associated outer membrane lipoprotein                              | -0.0697 | 0.1271 |
| JW0732 | ybgF | periplasmic TolA-binding protein                                                 | -0.0865 | 0.0037 |
| JW0733 | nadA | quinolinate synthase, subunit A                                                  | 0.2520  | 0.0001 |
| JW0734 | pnuC | nicotinamide riboside transporter                                                | -0.0469 | 0.1126 |
| JW0735 | zitB | zinc efflux system                                                               | -0.0526 | 0.0053 |
| JW0736 | ybgS | putative periplasmic protein                                                     | -0.0452 | 0.0762 |
| JW0737 | aroG | 3-deoxy-D-arabino-heptulosonate-7-phosphate synthase, phenylalanine repressible  | 0.0453  | 0.0997 |
| JW0738 | gpmA | phosphoglyceromutase 1                                                           | 0.0000  | 0.9990 |
| JW0739 | galM | aldose 1-epimerase; type-1 mutarotase; galactose mutarotase                      | 0.1577  | 0.0000 |
| JW0740 | galK | galactokinase                                                                    | -0.0389 | 0.3534 |
| JW0741 | galT | galactose-1-phosphate uridylyltransferase                                        | -0.0810 | 0.0006 |
| JW0742 | galE | UDP-galactose-4-epimerase                                                        | 0.0097  | 0.8270 |
| JW0743 | modF | molybdate ABC transporter ATPase                                                 | -0.0722 | 0.1842 |
| JW0744 | modE | transcriptional repressor for the molybdenum transport operon modABC             | -0.0410 | 0.5248 |
| JW0747 | modB | molybdate ABC transporter permease; chlorate resistance protein                  | 0.0910  | 0.0021 |
| JW0748 | modC | molybdate ABC transporter ATPase; chlorate resistance protein                    | 0.0518  | 0.3994 |
| JW0749 | ybhA | pyridoxal phosphate (PLP) phosphatase                                            | 0.0695  | 0.0107 |
| JW0750 | ybhE | 6-phosphogluconolactonase                                                        | -0.0628 | 0.0408 |
| JW0752 | ybhH | putative PrpF family isomerase                                                   | 0.0048  | 0.7957 |
| JW0753 | ybhI | putative DASS family tricarboxylate or dicarboxylate transporter                 | 0.0453  | 0.0416 |
| JW0755 | ybhC | acyl-CoA thioesterase, lipoprotein                                               | 0.1452  | 0.0211 |
| JW0756 | ybhB | kinase inhibitor homolog, UPF0098 family                                         | -0.0522 | 0.0225 |
| JW0757 | bioA | 7,8-diaminopelargonic acid synthase, PLP-dependent                               | 0.1248  | 0.0019 |
| JW0758 | bioB | biotin synthase                                                                  | 0.1907  | 0.0854 |
| JW0759 | bioF | 8-amino-7-oxononanoate synthase                                                  | 0.1890  | 0.0010 |
| JW0760 | bioC | malonyl-ACP O-methyltransferase, SAM-dependent                                   | 0.1850  | 0.0097 |
| JW0761 | bioD | dethiobiotin synthetase                                                          | 0.0368  | 0.4311 |
| JW0762 | uvrB | exision nuclease of nucleotide excision repair, DNA damage recognition component | 0.0596  | 0.1760 |
| JW0763 | ybhK | putative CofD superfamily transferase                                            | 0.0169  | 0.5842 |
| JW0764 | moaA | molybdopterin biosynthesis protein A                                             | 0.0595  | 0.0121 |

|        |      |                                                                                  |         |        |
|--------|------|----------------------------------------------------------------------------------|---------|--------|
| JW0765 | moaB | inactive molybdopterin adenylyltransferase                                       | -0.0026 | 0.9322 |
| JW0766 | moaC | molybdopterin biosynthesis, protein C                                            | -0.1019 | 0.0006 |
| JW0767 | moaD | molybdopterin synthase, small subunit                                            | -0.0765 | 0.0687 |
| JW0768 | moaE | molybdopterin synthase, large subunit                                            | 0.0059  | 0.8292 |
| JW0769 | ybhL | putative acetate transporter; BAX Inhibitor-1 family inner membrane protein      | -0.0594 | 0.6739 |
| JW0770 | ybhM | BAX Inhibitor-1 family inner membrane protein                                    | 0.0027  | 0.8898 |
| JW0772 | ybhO | cardiolipin synthase 2                                                           | -0.2683 | 0.0006 |
| JW0773 | ybhP | endo/exonuclease/phosphatase family protein                                      | 0.0164  | 0.5391 |
| JW0774 | ybhQ | inner membrane protein                                                           | -0.0404 | 0.1556 |
| JW0777 | ybhS | putative ABC transporter permease                                                | -0.0954 | 0.0710 |
| JW0779 | ybhG | putative membrane fusion protein (MFP) component of efflux pump, membrane anchor | 0.0147  | 0.5810 |
| JW0780 | ybiH | DUF1956 domain-containing tetR family putative transcriptional regulator         | -0.0022 | 0.9418 |
| JW0781 | rhIE | ATP-dependent RNA helicase                                                       | 0.0377  | 0.4712 |
| JW0783 | ybiA | DUF1768 family protein                                                           | -0.0281 | 0.0817 |
| JW0784 | dinG | ATP-dependent DNA helicase                                                       | 0.0020  | 0.9425 |
| JW0785 | ybiB | putative family 3 glycosyltransferase                                            | 0.0063  | 0.8132 |
| JW0786 | ybiC | hydroxycarboxylate dehydrogenase B                                               | 0.0055  | 0.8920 |
| JW0787 | ybiJ | DUF1471 family periplasmic protein, trinitrotoluene-inducible                    | -0.0337 | 0.1626 |
| JW0788 | ybiI | DksA-type zinc finger protein                                                    | -0.0693 | 0.0015 |
| JW0790 | fiu  | catecholate siderophore receptor                                                 | 0.0106  | 0.7370 |
| JW0794 | glnQ | glutamine transporter subunit                                                    | -0.0072 | 0.7740 |
| JW0795 | glnP | glutamine transporter subunit                                                    | -0.1106 | 0.1289 |
| JW0796 | glnH | glutamine transporter subunit                                                    | -0.0360 | 0.3705 |
| JW0797 | dps  | Fe-binding and storage protein; stress-inducible DNA-binding protein             | 0.0000  | 0.9990 |
| JW0798 | rhtA | threonine and homoserine efflux system                                           | 0.0655  | 0.0580 |
| JW0799 | ompX | outer membrane protein X                                                         | -0.0648 | 0.0185 |
| JW0800 | ybiP | OPG biosynthetic transmembrane phosphoethanolamine transferase                   | 0.0081  | 0.8260 |
| JW0801 | mntR | Mn(2+)-responsive manganese regulon transcriptional regulator                    | -0.0210 | 0.3015 |
| JW0802 | ybiR | putative ArsB family transporter; inner membrane protein                         | -0.0449 | 0.0479 |
| JW0803 | ybiS | L,D-transpeptidase linking Lpp to murein                                         | 0.0420  | 0.0596 |
| JW0804 | ybiT | ABC-F family putative regulatory ATPase                                          | -0.2325 | 0.0566 |
| JW0805 | ybiU | DUF1479 family protein                                                           | -0.0065 | 0.7622 |



|        |      |                                                                                                                                                 |         |        |
|--------|------|-------------------------------------------------------------------------------------------------------------------------------------------------|---------|--------|
| JW0806 | ybiV | sugar phosphatase; fructose-1-P/ribose-5-P/glucose-6-P phosphatase                                                                              | -0.0445 | 0.2509 |
| JW0807 | ybiW | putative pyruvate formate lyase                                                                                                                 | 0.0872  | 0.0017 |
| JW0808 | ybiY | putative pyruvate formate lyase activating enzyme                                                                                               | -0.0579 | 0.0465 |
| JW0810 | moeB | molybdopterin synthase sulfurylase                                                                                                              | 0.0060  | 0.8416 |
| JW0811 | moeA | molybdopterin molybdenumtransferase; molybdopterin biosynthesis protein                                                                         | -0.0420 | 0.5508 |
| JW0812 | iaaA | Isoaspartyl peptidase                                                                                                                           | 0.0074  | 0.7565 |
| JW0815 | yliC | glutathione ABC transporter permease                                                                                                            | 0.0723  | 0.0253 |
| JW0816 | yliD | glutathione ABC transporter permease                                                                                                            | -0.0668 | 0.5316 |
| JW0817 | yliE | putative membrane-anchored cyclic-di-GMP phosphodiesterase                                                                                      | -0.0710 | 0.0253 |
| JW0818 | yliF | putative membrane-anchored diguanylate cyclase                                                                                                  | -0.0394 | 0.1955 |
| JW0819 | yliG | ribosomal protein S12 methylthiotransferase                                                                                                     | 0.1266  | 0.0293 |
| JW0820 | yliH | repressor of biofilm formation by indole transport regulation                                                                                   | -0.0322 | 0.3865 |
| JW0821 | yliI | soluble aldose sugar dehydrogenase                                                                                                              | 0.0278  | 0.3856 |
| JW0822 | yliJ | glutathione S-transferase                                                                                                                       | -0.0655 | 0.0218 |
| JW0823 | dacC | D-alanyl-D-alanine carboxypeptidase; penicillin-binding protein 6a                                                                              | -0.0098 | 0.8100 |
| JW0824 | deoR | deoxyribose-5-phosphate-inducible deoxyribose operon transcriptional repressor; repressor of nupG and tsx                                       | -0.0030 | 0.8056 |
| JW0826 | cmr  | multidrug efflux system protein                                                                                                                 | -0.0124 | 0.8193 |
| JW0827 | ybjH | uncharacterized protein                                                                                                                         | 0.0035  | 0.8147 |
| JW0829 | ybjJ | putative drug efflux MFS transporter, inner membrane protein                                                                                    | 0.0039  | 0.9235 |
| JW0831 | ybjL | putative transporter                                                                                                                            | -0.0357 | 0.5134 |
| JW0832 | ybjM | inner membrane protein                                                                                                                          | -0.0274 | 0.0479 |
| JW0833 | grxA | glutaredoxin 1, redox coenzyme for ribonucleotide reductase (RNR1a)                                                                             | -0.0004 | 0.9906 |
| JW0834 | ybjC | DUF1418 family protein                                                                                                                          | -0.0248 | 0.4200 |
| JW0835 | nfsA | nitroreductase A, NADPH-dependent, FMN-dependent                                                                                                | -0.0200 | 0.4996 |
| JW0836 | rimK | ribosomal protein S6 modification protein                                                                                                       | 0.0438  | 0.0245 |
| JW0837 | ybjN | multicopy suppressor of coaA(Ts); ionizing radiation survival protein; putative chaperone; putative negative regulator of fimbriae and motility | 0.1713  | 0.0586 |
| JW0838 | potF | putrescine ABC transporter periplasmic binding protein                                                                                          | -0.0625 | 0.0002 |
| JW0840 | potH | putrescine ABC transporter permease                                                                                                             | 0.0772  | 0.1373 |

|        |      |                                                                                               |         |        |
|--------|------|-----------------------------------------------------------------------------------------------|---------|--------|
| JW0841 | potI | putrescine ABC transporter permease                                                           | 0.1676  | 0.1732 |
| JW0842 | ybjO | DUF2593 family inner membrane protein                                                         | 0.0521  | 0.0766 |
| JW0844 | artJ | arginine ABC transporter periplasmic binding protein                                          | 0.0545  | 0.4118 |
| JW0845 | artM | arginine ABC transporter permease                                                             | -0.0106 | 0.7253 |
| JW0846 | artQ | arginine ABC transporter permease                                                             | -0.0121 | 0.6826 |
| JW0847 | artI | arginine transporter subunit                                                                  | 0.0011  | 0.9632 |
| JW0848 | artP | arginine ABC transporter ATPase                                                               | 0.0094  | 0.6916 |
| JW0849 | ybjP | lipoprotein                                                                                   | 0.0384  | 0.0707 |
| JW0850 | ybjQ | UPF0145 family protein                                                                        | -0.0454 | 0.0000 |
| JW0851 | ybjR | 1,6-anhydro-N-acetylmuramyl-L-alanine amidase, Zn-dependent; OM lipoprotein                   | 0.0701  | 0.1207 |
| JW0854 | ltaE | L-allo-threonine aldolase, PLP-dependent                                                      | 0.0081  | 0.6478 |
| JW0855 | poxB | pyruvate dehydrogenase, thiamine triphosphate-binding, FAD-binding                            | 0.0482  | 0.0993 |
| JW0858 | ybjE | putative transporter                                                                          | 0.0078  | 0.8427 |
| JW0859 | aqpZ | aquaporin Z                                                                                   | 0.0919  | 0.0385 |
| JW0860 | ybjD | putative OLD family ATP-dependent endonuclease; DUF2813 family protein                        | -0.0163 | 0.5726 |
| JW0861 | ybjX | DUF535 family protein                                                                         | 0.0153  | 0.6982 |
| JW0862 | macA | macrolide transporter membrane fusion protein (MFP) component                                 | 0.0490  | 0.0569 |
| JW0863 | macB | macrolide ABC transporter permease/ATPase                                                     | 0.0423  | 0.3108 |
| JW0864 | cspD | inhibitor of DNA replication, cold shock protein homolog                                      | 0.1141  | 0.0028 |
| JW0865 | clpS | regulatory protein for ClpA substrate specificity                                             | -0.0167 | 0.6505 |
| JW0866 | clpA | ATPase and specificity subunit of ClpA-ClpP ATP-dependent serine protease, chaperone activity | -0.0009 | 0.9761 |
| JW0868 | aat  | leucyl/phenylalanyl-tRNA-protein transferase                                                  | 0.0316  | 0.0966 |
| JW0870 | cydD | glutathione/cysteine ABC transporter export permease/ATPase                                   | -0.1451 | 0.3942 |
| JW0871 | trxB | thioredoxin reductase, FAD/NAD(P)-binding                                                     | 0.0528  | 0.1384 |
| JW0872 | lrp  | leucine-responsive global transcriptional regulator                                           | 0.0704  | 0.0630 |
| JW0875 | ycaJ | recombination intermediate processing DNA-dependent ATPase                                    | 0.1241  | 0.0025 |
| JW0878 | dmsB | dimethyl sulfoxide reductase, anaerobic, subunit B                                            | 0.0883  | 0.0080 |
| JW0879 | dmsC | dimethyl sulfoxide reductase, anaerobic, subunit C                                            | 0.0926  | 0.0080 |
| JW0880 | ycaC | putative isochorismatase family hydrolase                                                     | 0.0317  | 0.0702 |
| JW0881 | ycaD | putative MFS transporter, inner membrane protein                                              | -0.2113 | 0.1024 |

|        |      |                                                                                                             |         |        |
|--------|------|-------------------------------------------------------------------------------------------------------------|---------|--------|
| JW0883 | ycaN | LysR family putative transcriptional regulator                                                              | -0.0099 | 0.7248 |
| JW0884 | ycaK | putative NAD(P)H-dependent oxidoreductase                                                                   | -0.0809 | 0.0860 |
| JW0885 | pflA | pyruvate formate-lyase 1-activating enzyme; [formate-C-acetyltransferase 1]-activating enzyme; PFL activase | -0.3423 | 0.0000 |
| JW0886 | pflB | formate C-acetyltransferase 1, anaerobic; pyruvate formate-lyase 1                                          | -0.1625 | 0.0000 |
| JW0887 | focA | formate channel                                                                                             | 0.0119  | 0.6463 |
| JW0888 | ycaO | ribosomal protein S12 methylthiotransferase accessory factor                                                | 0.0822  | 0.0125 |
| JW0889 | ycaP | UPF0702 family putative inner membrane protein                                                              | -0.0617 | 0.1927 |
| JW0890 | serC | 3-phosphoserine/phosphohydroxythreonine aminotransferase                                                    | 0.1942  | 0.0034 |
| JW0891 | aroA | 5-enolpyruvylshikimate-3-phosphate synthetase                                                               | 0.1067  | 0.0240 |
| JW0892 | ycaL | putative peptidase-related chaperone                                                                        | 0.0121  | 0.6023 |
| JW0893 | cmk  | cytidylate kinase                                                                                           | -0.2031 | 0.1069 |
| JW0895 | ihfB | integration host factor (IHF), DNA-binding protein, beta subunit                                            | 0.0113  | 0.5668 |
| JW0899 | ycaQ | DUF1006 family protein with C-terminal wHTH domain                                                          | -0.0708 | 0.0019 |
| JW0900 | ycaR | peroxide and acid resistance protein, UPF0434 family                                                        | -0.0411 | 0.4108 |
| JW0903 | ycbC | envelope biogenesis factor; DUF218 superfamily protein                                                      | -0.0459 | 0.5343 |
| JW0904 | smtA | putative S-adenosyl-L-methionine-dependent methyltransferase                                                | 0.0192  | 0.1825 |
| JW0908 | ycbB | murein L,D-transpeptidase                                                                                   | 0.0051  | 0.8814 |
| JW0909 | ycbK | M15A protease-related family periplasmic protein                                                            | -0.0508 | 0.0380 |
| JW0910 | ycbL | putative metal-binding enzyme                                                                               | -0.1061 | 0.3013 |
| JW0911 | aspC | aspartate aminotransferase, PLP-dependent                                                                   | -0.0803 | 0.2517 |
| JW0912 | ompF | outer membrane porin 1a (Ia;b;F)                                                                            | 0.0162  | 0.4283 |
| JW0914 | pncB | nicotinate phosphoribosyltransferase                                                                        | 0.1026  | 0.0130 |
| JW0915 | pepN | aminopeptidase N                                                                                            | -0.0113 | 0.6900 |
| JW0916 | ssuB | aliphatic sulfonate ABC transporter ATPase                                                                  | -0.0691 | 0.0661 |
| JW0918 | ssuD | alkanesulfonate monooxygenase, FMNH(2)-dependent                                                            | -0.0514 | 0.0707 |
| JW0919 | ssuA | aliphatic sulfonate ABC transporter periplasmic binding protein                                             | -0.0112 | 0.8008 |
| JW0920 | ssuE | NAD(P)H-dependent FMN reductase                                                                             | 0.2421  | 0.0685 |
| JW0922 | ycbR | putative periplasmic pilin chaperone                                                                        | -0.0168 | 0.5521 |
| JW0923 | ycbS | putative outer membrane fimbrial subunit export usher protein                                               | 0.0179  | 0.6049 |
| JW0924 | ycbT | putative fimbrial-like adhesin protein                                                                      | -0.0925 | 0.0007 |
| JW0925 | ycbU | putative fimbriae protein                                                                                   | -0.0563 | 0.0280 |

|        |      |                                                                                             |         |        |
|--------|------|---------------------------------------------------------------------------------------------|---------|--------|
| JW0925 | ycbU | putative fimbriae protein                                                                   | -0.0338 | 0.2286 |
| JW0928 | pyrD | dihydro-orotate oxidase, FMN-linked                                                         | -0.0380 | 0.4724 |
| JW0931 | ycbY | 23S rRNA m(2)G2445 and m(7)G2069 methyltransferases, SAM-dependent                          | -0.1018 | 0.0008 |
| JW0932 | uup  | replication regulatory ABC-F family DNA-binding ATPase                                      | 0.0514  | 0.1682 |
| JW0933 | pqiA | inner membrane subunit of the putative PqiABC transporter                                   | 0.1027  | 0.0098 |
| JW0934 | pqiB | periplasmic MCE subunit of the putative PqiABC transporter, IM-anchored, paraquat-inducible | -0.0925 | 0.0039 |
| JW0936 | rmf  | ribosome modulation factor                                                                  | -0.0528 | 0.0296 |
| JW0938 | ycbZ | putative peptidase                                                                          | -0.0613 | 0.1170 |
| JW0939 | ycbG | Ter macrodomain organizer matS-binding protein                                              | -0.0641 | 0.0368 |
| JW0940 | ompA | outer membrane protein A (3a;II*;G;d)                                                       | 0.1689  | 0.0113 |
| JW0941 | sula | SOS cell division inhibitor                                                                 | -0.0278 | 0.1279 |
| JW0942 | yccR | CRP-S-dependent promoter expression factor                                                  | -0.0778 | 0.1144 |
| JW0944 | yccF | DUF307 family inner membrane protein                                                        | 0.1514  | 0.0022 |
| JW0945 | helD | DNA helicase IV                                                                             | 0.0857  | 0.0001 |
| JW0947 | yccT | UPF0319 family protein                                                                      | 0.0407  | 0.2460 |
| JW0952 | yccK | mnm(5)-s(2)U34-tRNA 2-thiolation sulfurtransferase                                          | -0.0446 | 0.2200 |
| JW0953 | yccA | Modulator of FtsH protease, inner membrane protein                                          | 0.0802  | 0.5564 |
| JW0954 | hyaA | hydrogenase 1, small subunit                                                                | 0.0539  | 0.1685 |
| JW0955 | hyaB | hydrogenase 1, large subunit                                                                | -0.1019 | 0.0582 |
| JW0956 | hyaC | hydrogenase 1, b-type cytochrome subunit                                                    | 0.1108  | 0.0000 |
| JW0957 | hyaD | hydrogenase 1 maturation protease                                                           | -0.0369 | 0.0227 |
| JW0958 | hyaE | putative HyaA chaperone                                                                     | 0.0074  | 0.7538 |
| JW0959 | hyaF | hydrogenase-1 protein nickel incorporation factor                                           | 0.0519  | 0.1039 |
| JW0960 | appC | cytochrome bd-II oxidase, subunit I                                                         | 0.0353  | 0.3251 |
| JW0961 | appB | cytochrome bd-II oxidase, subunit II                                                        | 0.0435  | 0.4133 |
| JW0963 | appA | phosphoanhydride phosphorylase                                                              | -0.0413 | 0.1263 |
| JW0964 | yccC | tyrosine-protein kinase, role in O-antigen capsule formation                                | -0.0891 | 0.0009 |
| JW0966 | yccZ | putative O-antigen capsule outer membrane auxillary protein export channel                  | 0.0788  | 0.0059 |
| JW0967 | ymcA | putative O-antigen capsule production periplasmic protein                                   | -0.0118 | 0.6588 |
| JW0968 | ymcB | putative O-antigen capsule production periplasmic protein                                   | -0.0720 | 0.0462 |
| JW0969 | ymcC | O-antigen capsule production lipoprotein                                                    | 0.0512  | 0.0687 |
| JW0974 | cspG | cold shock protein homolog, cold-inducible                                                  | -0.1133 | 0.4060 |
| JW0975 | ymcE | cold shock gene                                                                             | 0.0685  | 0.0835 |
| JW0976 | gnsA | putative phosphatidylethanolamine synthesis regulator                                       | -0.0813 | 0.0529 |

|        |      |                                                                                                               |         |        |
|--------|------|---------------------------------------------------------------------------------------------------------------|---------|--------|
| JW0977 | yccM | putative 4Fe-4S membrane protein                                                                              | -0.0740 | 0.1439 |
| JW0980 | torR | response regulator in two-component regulatory system with TorS                                               | 0.0443  | 0.2154 |
| JW0981 | torC | trimethylamine N-oxide (TMAO) reductase I, cytochrome c-type subunit                                          | 0.0908  | 0.1952 |
| JW0982 | torA | trimethylamine N-oxide (TMAO) reductase I, catalytic subunit                                                  | 0.0977  | 0.0027 |
| JW0983 | torD | TorA-maturation chaperone                                                                                     | -0.0238 | 0.3785 |
| JW0985 | cbpA | DnaK co-chaperone; curved DNA-binding protein                                                                 | 0.0268  | 0.5277 |
| JW0986 | yccE | PRK09784 family protein                                                                                       | 0.3264  | 0.0000 |
| JW0987 | agp  | glucose-1-phosphatase/inositol phosphatase                                                                    | 0.0507  | 0.1170 |
| JW0988 | yccJ | uncharacterized protein                                                                                       | 0.0258  | 0.1525 |
| JW0989 | wrbA | NAD(P)H:quinone oxidoreductase                                                                                | -0.0831 | 0.0023 |
| JW0993 | ycdI | putative malonic semialdehyde reductase                                                                       | -0.0159 | 0.5506 |
| JW0994 | rarA | putative reactive intermediate detoxifying aminoacrylate hydrolase                                            | -0.1507 | 0.0737 |
| JW0995 | ycdK | putative aminoacrylate deaminase, reactive intermediate detoxification; weak enamine/imine deaminase activity | -0.0161 | 0.7270 |
| JW0997 | ycdM | pyrimidine oxygenase, FMN-dependent                                                                           | -0.0211 | 0.3375 |
| JW0998 | ycdC | rut operon transcriptional repressor for                                                                      | -0.0075 | 0.8402 |
| JW0999 | putA | fused DNA-binding transcriptional regulator/proline dehydrogenase/pyrroline-5-carboxylate dehydrogenase       | 0.1676  | 0.0099 |
| JW1001 | putP | proline:sodium symporter                                                                                      | -0.0246 | 0.3811 |
| JW1002 | ycdN | Putative inactive ferrous iron permease                                                                       | 0.0148  | 0.6045 |
| JW1003 | ycdO | inactive ferrous ion transporter EfeUOB                                                                       | -0.0196 | 0.4997 |
| JW1004 | ycdB | deferrochelate, periplasmic                                                                                   | -0.0378 | 0.1424 |
| JW1005 | phoH | ATP-binding protein; putative PhoH family P-loop ATPase                                                       | -0.0297 | 0.4078 |
| JW1006 | ycdP | biofilm PGA synthase PgaCD, regulatory subunit; c-di-GMP-stimulated activity and dimerization                 | 0.0427  | 0.0715 |
| JW1007 | ycdQ | biofilm PGA synthase PgaCD, catalytic subunit; poly-beta-1,6-N-acetyl-D-glucosamine synthase                  | 0.0588  | 0.0232 |
| JW1010 | ycdS | biofilm adhesin polysaccharide PGA secretin; OM porin; poly-beta-1,6-N-acetyl-D-glucosamine export protein    | 0.0886  | 0.0114 |
| JW1015 | ycdU | putative inner membrane protein                                                                               | 0.0259  | 0.3912 |
| JW1017 | ycdX | alkaline phosphatase                                                                                          | 0.0445  | 0.0176 |

|        |      |                                                                                                                                                                  |         |        |
|--------|------|------------------------------------------------------------------------------------------------------------------------------------------------------------------|---------|--------|
| JW1018 | ycdY | redox enzyme maturation protein (REMP)<br>chaperone for YcdX                                                                                                     | -0.0181 | 0.4021 |
| JW1020 | csgG | curli production assembly/transport outer<br>membrane lipoprotein                                                                                                | -0.1016 | 0.0003 |
| JW1021 | csgF | curli nucleation outer membrane protein                                                                                                                          | 0.1788  | 0.0006 |
| JW1022 | csgE | curlin secretion specificity factor                                                                                                                              | -0.0185 | 0.6024 |
| JW1023 | csgD | csgBAC operon transcriptional regulator                                                                                                                          | -0.0487 | 0.1433 |
| JW1024 | csgB | curlin nucleator protein, minor subunit in<br>curli complex                                                                                                      | -0.0026 | 0.9454 |
| JW1025 | csgA | curlin subunit, amyloid curli fibers, cryptic                                                                                                                    | 0.0329  | 0.5162 |
| JW1026 | csgC | curli assembly protein                                                                                                                                           | -0.0224 | 0.4378 |
| JW1031 | ymdA | uncharacterized protein                                                                                                                                          | 0.0427  | 0.1441 |
| JW1032 | ymdB | O-acetyl-ADP-ribose deacetylase; RNase III<br>inhibitor during cold shock; putative<br>cardiolipin synthase C regulatory subunit                                 | 0.0697  | 0.0090 |
| JW1034 | mdoC | OPG biosynthetic transmembrane<br>succinyltransferase                                                                                                            | 0.0229  | 0.1295 |
| JW1035 | mdoG | OPG biosynthetic periplasmic beta-1,6<br>branching glycosyltransferase                                                                                           | -0.0512 | 0.1600 |
| JW1037 | mdoH | OPG biosynthetic ACP-dependent<br>transmembrane UDP-glucose beta-1,2<br>glycosyltransferase; nutrient-dependent cell<br>size regulator, FtsZ assembly antagonist | -0.0045 | 0.8789 |
| JW1039 | msyB | multicopy suppressor of secY and secA                                                                                                                            | -0.0289 | 0.3059 |
| JW1040 | mdtG | putative drug efflux system protein                                                                                                                              | -0.0557 | 0.2367 |
| JW1041 | lpxL | lauryl-acyl carrier protein (ACP)-dependent<br>acyltransferase                                                                                                   | -0.0463 | 0.7670 |
| JW1042 | yceA | putative rhodanese-related sulfurtransferase                                                                                                                     | -0.0728 | 0.2054 |
| JW1043 | yceI | periplasmic high pH-inducible lipid-binding<br>protein                                                                                                           | 0.1365  | 0.0008 |
| JW1044 | yceJ | putative cytochrome b561                                                                                                                                         | 0.0078  | 0.7247 |
| JW1045 | yceO | uncharacterized protein                                                                                                                                          | -0.1141 | 0.0003 |
| JW1046 | solA | N-methyltryptophan oxidase, FAD-binding                                                                                                                          | -0.0031 | 0.9384 |
| JW1048 | dinI | DNA damage-inducible protein I                                                                                                                                   | -0.0670 | 0.7188 |
| JW1049 | pyrC | dihydro-ototase                                                                                                                                                  | 0.0447  | 0.2334 |
| JW1050 | yceB | lipoprotein, DUF1439 family                                                                                                                                      | 0.0551  | 0.0063 |
| JW1051 | grxB | glutaredoxin 2 (Grx2)                                                                                                                                            | -0.0037 | 0.9563 |
| JW1052 | mdtH | multidrug resistance efflux transporter<br>conferring overexpression resistance to<br>norfloxacin and enoxacin                                                   | 0.0176  | 0.5799 |
| JW1053 | rimJ | ribosomal-protein-S5-alanine N-<br>acetyltransferase                                                                                                             | 0.0323  | 0.6001 |
| JW1054 | yceH | UPF0502 family protein                                                                                                                                           | -0.0139 | 0.2066 |

|        |      |                                                                                                        |         |        |
|--------|------|--------------------------------------------------------------------------------------------------------|---------|--------|
| JW1055 | mviM | putative oxidoreductase                                                                                | -0.0330 | 0.1421 |
| JW1057 | flgN | export chaperone for FlgK and FlgL                                                                     | -0.0433 | 0.2950 |
| JW1059 | flgA | assembly protein for flagellar basal-body periplasmic P ring                                           | 0.1145  | 0.0109 |
| JW1060 | flgB | flagellar component of cell-proximal portion of basal-body rod                                         | 0.0171  | 0.6494 |
| JW1061 | flgC | flagellar component of cell-proximal portion of basal-body rod                                         | 0.0547  | 0.3716 |
| JW1062 | flgD | flagellar hook assembly protein                                                                        | 0.1365  | 0.0013 |
| JW1063 | flgE | flagellar hook protein                                                                                 | 0.0627  | 0.3361 |
| JW1064 | flgF | flagellar component of cell-proximal portion of basal-body rod                                         | -0.0754 | 0.1717 |
| JW1065 | flgG | flagellar component of cell-distal portion of basal-body rod                                           | 0.0327  | 0.4728 |
| JW1067 | flgI | putative flagellar basal body protein                                                                  | -0.0011 | 0.9817 |
| JW1068 | flgJ | bifunctional flagellar rod assembly protein (N-terminal) and beta-N-acetylglucosaminidase (C-terminal) | 0.1302  | 0.0090 |
| JW1069 | flgK | flagellar hook-filament junction protein 1                                                             | 0.1292  | 0.0050 |
| JW1070 | flgL | flagellar hook-filament junction protein                                                               | 0.0563  | 0.0539 |
| JW1072 | rluC | 23S rRNA pseudouridine(955,2504,2580) synthase                                                         | 0.0620  | 0.0137 |
| JW1074 | yceD | DUF177 family protein                                                                                  | -0.0016 | 0.9148 |
| JW1075 | rpmF | 50S ribosomal subunit protein L32                                                                      | -0.0797 | 0.0174 |
| JW1077 | fabH | 3-oxoacyl-[acyl-carrier-protein] synthase III                                                          | 0.0887  | 0.0171 |
| JW1081 | fabF | 3-oxoacyl-[acyl-carrier-protein] synthase II                                                           | -0.1612 | 0.0039 |
| JW1082 | pabC | 4-amino-4-deoxychorismate lyase component of para-aminobenzoate synthase multienzyme complex           | -0.0195 | 0.5548 |
| JW1083 | yceG | septation protein, ampicillin sensitivity                                                              | -0.0117 | 0.7275 |
| JW1086 | ycfH | putative DNase                                                                                         | 0.1408  | 0.0000 |
| JW1087 | ptsG | fused glucose-specific PTS enzymes: IIB component/IIC component                                        | 0.0451  | 0.5418 |
| JW1088 | fhuE | ferric-rhodotorulic acid outer membrane transporter                                                    | -0.0222 | 0.6150 |
| JW1090 | ycfL | uncharacterized protein                                                                                | 0.0579  | 0.0177 |
| JW1092 | ycfN | thiamine kinase                                                                                        | 0.0977  | 0.0041 |
| JW1093 | nagZ | beta N-acetyl-glucosaminidase                                                                          | 0.0145  | 0.6269 |
| JW1095 | ndh  | respiratory NADH dehydrogenase 2/cupric reductase                                                      | -0.0551 | 0.0030 |
| JW1096 | ycfJ | uncharacterized protein                                                                                | 0.1401  | 0.1990 |
| JW1098 | ycfR | biofilm, cell surface and signaling protein                                                            | 0.0435  | 0.0479 |
| JW1100 | mfd  | transcription-repair coupling factor                                                                   | -0.2756 | 0.2021 |

|        |      |                                                                                               |         |        |
|--------|------|-----------------------------------------------------------------------------------------------|---------|--------|
| JW1101 | ycfT | inner membrane protein                                                                        | -0.0738 | 0.0344 |
| JW1105 | ycfX | N-acetyl-D-glucosamine kinase                                                                 | 0.0309  | 0.2325 |
| JW1106 | cobB | deacetylase of acs and cheY, chemotaxis regulator                                             | -0.0473 | 0.0542 |
| JW1109 | potD | spermidine/putrescine ABC transporter periplasmic binding protein                             | 0.0096  | 0.7184 |
| JW1110 | potC | spermidine/putrescine ABC transporter permease                                                | 0.0237  | 0.5522 |
| JW1111 | potB | spermidine/putrescine ABC transporter permease                                                | 0.0317  | 0.3690 |
| JW1112 | potA | spermidine/putrescine ABC transporter ATPase                                                  | -0.0219 | 0.4607 |
| JW1113 | pepT | peptidase T                                                                                   | -0.0333 | 0.4337 |
| JW1114 | ycfD | 50S ribosomal protein L16 arginine hydroxylase; 2-oxoglutarate oxygenase                      | -0.0883 | 0.0017 |
| JW1115 | phoQ | sensory histidine kinase in two-component regulatory system with PhoP                         | 0.0218  | 0.5920 |
| JW1116 | phoP | response regulator in two-component regulatory system with PhoQ                               | 0.0137  | 0.4979 |
| JW1119 | trmU | tRNA(Gln,Lys,Glu) U34 2-thiouridylase                                                         | -0.2376 | 0.0442 |
| JW1120 | yfmB | bifunctional thiamine pyrimidine pyrophosphate hydrolase and thiamine pyrophosphate hydrolase | 0.0674  | 0.1163 |
| JW1121 | yfmC | 23S rRNA pseudouridine(2457) synthase                                                         | -0.1132 | 0.0287 |
| JW1122 | icd  | isocitrate dehydrogenase; e14 prophage attachment site; tellurite reductase                   | 0.1241  | 0.0048 |
| JW1123 | yfmD | e14 prophage; putative SAM-dependent methyltransferase                                        | -0.0517 | 0.0107 |
| JW1125 | lit  | T4 phage exclusion protein; cell death peptidase, e14 prophage                                | -0.0496 | 0.1473 |
| JW1126 | intE | e14 prophage; putative integrase                                                              | 0.0080  | 0.6833 |
| JW1127 | yfmG | e14 prophage; putative excisionase                                                            | 0.0261  | 0.2316 |
| JW1128 | yfmH | Putative uncharacterized protein b1142                                                        | -0.0531 | 0.0126 |
| JW1130 | ymfJ | Uncharacterized protein                                                                       | 0.3479  | 0.0352 |
| JW1133 | ymfL | e14 prophage; putative DNA-binding transcriptional regulator                                  | 0.0079  | 0.8310 |
| JW1134 | yfmM | e14 prophage; uncharacterized protein                                                         | 0.0244  | 0.1151 |
| JW1135 | yfmN | pseudogene, phage terminase protein A family, e14 prophage                                    | -0.0042 | 0.9175 |
| JW1136 | yfmR | e14 prophage; uncharacterized protein                                                         | 0.0121  | 0.2652 |
| JW1137 | yfmO | pseudogene, portal protein family, e14 prophage                                               | 0.0064  | 0.7387 |
| JW1139 | ymfQ | prohage e14 tail protein homolog                                                              | -0.0320 | 0.0332 |
| JW1140 | ycfK | e14 prophage; uncharacterized protein                                                         | 0.0769  | 0.0004 |
| JW1142 | tfaE | e14 prophage; putative tail fiber assembly protein                                            | -0.0023 | 0.8978 |



|        |      |                                                                                                                          |         |        |
|--------|------|--------------------------------------------------------------------------------------------------------------------------|---------|--------|
| JW1144 | pin  | e14 prophage; site-specific DNA recombinase                                                                              | 0.0549  | 0.2688 |
| JW1145 | mcrA | putative 5-methylcytosine/5-hydroxymethylcytosine-specific restriction nuclease; 5-methylcytosine DNA binding protein    | -0.1291 | 0.0548 |
| JW1147 | elbA | RpoS stabilizer during Mg starvation, anti-RssB factor                                                                   | -0.0424 | 0.0762 |
| JW1148 | ycgX | DUF1398 family protein                                                                                                   | 0.0053  | 0.8375 |
| JW1149 | ycgE | repressor of blue light-responsive genes                                                                                 | -0.0437 | 0.1322 |
| JW1150 | ycgF | anti-repressor for YcgE, blue light-responsive; FAD-binding; inactive c-di-GMP phosphodiesterase-like EAL domain protein | 0.0392  | 0.1744 |
| JW1151 | ycgZ | RcsB connector protein for regulation of biofilm and acid-resistance                                                     | 0.0240  | 0.4690 |
| JW1152 | ymgA | RcsB connector protein for regulation of biofilm                                                                         | 0.0086  | 0.6660 |
| JW1153 | ymgB | RcsB connector protein for regulation of biofilm and acid-resistance                                                     | 0.0488  | 0.1130 |
| JW1154 | ymgC | blue light, low temperature and stress induced protein                                                                   | -0.0162 | 0.5541 |
| JW1156 | ymgF | inner membrane division septum protein                                                                                   | -0.0124 | 0.3536 |
| JW1162 | ycgI | pseudogene                                                                                                               | 0.0183  | 0.0792 |
| JW1165 | minC | inhibitor of FtsZ ring polymerization                                                                                    | -0.3693 | 0.0000 |
| JW1166 | ycgJ | uncharacterized protein                                                                                                  | -0.0656 | 0.0222 |
| JW1167 | ycgK | periplasmic inhibitor of g-type lysozyme                                                                                 | -0.1948 | 0.0640 |
| JW1168 | ycgL | UPF0745 family protein                                                                                                   | 0.0175  | 0.7061 |
| JW1169 | ycgM | putative isomerase/hydrolase                                                                                             | -0.0006 | 0.9916 |
| JW1173 | umuC | translesion error-prone DNA polymerase V subunit; DNA polymerase activity                                                | -0.0076 | 0.7698 |
| JW1175 | nhaB | sodium:proton antiporter                                                                                                 | 0.1842  | 0.0116 |
| JW1176 | fadR | fatty acid metabolism regulon transcriptional regulator                                                                  | -0.0973 | 0.1958 |
| JW1177 | ycgB | SpoVR family stationary phase protein                                                                                    | -0.0531 | 0.2088 |
| JW1178 | dadA | D-amino acid dehydrogenase                                                                                               | 0.0248  | 0.5290 |
| JW1179 | dadX | alanine racemase, catabolic, PLP-binding                                                                                 | 0.0125  | 0.7771 |
| JW1181 | ldcA | murein tetrapeptide carboxypeptidase; LD-carboxypeptidase A                                                              | 0.3106  | 0.0000 |
| JW1183 | ycgR | flagellar velocity braking protein, c-di-GMP-regulated                                                                   | 0.0705  | 0.0918 |
| JW1184 | ymgE | UPF0410 family putative inner membrane protein                                                                           | -0.0541 | 0.2469 |
| JW1185 | ycgY | uncharacterized protein                                                                                                  | -0.0222 | 0.4117 |
| JW1186 | treA | periplasmic trehalase                                                                                                    | 0.0499  | 0.0069 |

|        |      |                                                                                                             |         |        |
|--------|------|-------------------------------------------------------------------------------------------------------------|---------|--------|
| JW1193 | ycgV | putative adhesin                                                                                            | -0.1179 | 0.1123 |
| JW1194 | ychF | catalase inhibitor protein; ATPase, K+-dependent, ribosome-associated                                       | -0.0116 | 0.5048 |
| JW1196 | ychH | DUF2583 family putative inner membrane protein                                                              | -0.0009 | 0.9578 |
| JW1204 | ychQ | SIRB family inner membrane protein                                                                          | -0.0602 | 0.0022 |
| JW1205 | ychA | transglutaminase-like TPR-repeat protein                                                                    | -0.0022 | 0.9529 |
| JW1207 | chaA | calcium/sodium:proton antiporter                                                                            | -0.0401 | 0.7227 |
| JW1208 | chaB | cation transport regulator                                                                                  | -0.0633 | 0.5163 |
| JW1209 | chaC | cation transport regulator                                                                                  | -0.0134 | 0.7599 |
| JW1211 | ychP | putative invasin                                                                                            | 0.0262  | 0.5182 |
| JW1212 | narL | response regulator in two-component regulatory system with NarX                                             | 0.0168  | 0.5189 |
| JW1213 | narX | sensory histidine kinase in two-component regulatory system with NarL                                       | -0.0552 | 0.2982 |
| JW1214 | narK | nitrate/nitrite transporter                                                                                 | -0.0264 | 0.3088 |
| JW1215 | narG | nitrate reductase 1, alpha subunit                                                                          | -0.0483 | 0.0342 |
| JW1216 | narH | nitrate reductase 1, beta (Fe-S) subunit                                                                    | 0.0078  | 0.7501 |
| JW1217 | narJ | molybdenum-cofactor-assembly chaperone delta subunit of nitrate reductase 1                                 | 0.1565  | 0.0287 |
| JW1218 | narI | nitrate reductase 1, gamma (cytochrome b(NR)) subunit                                                       | -0.0411 | 0.3333 |
| JW1219 | tpr  | protamine-like protein                                                                                      | 0.0145  | 0.6370 |
| JW1220 | purU | formyltetrahydrofolate hydrolase                                                                            | 0.2370  | 0.0001 |
| JW1221 | ychJ | UPF0225 family protein                                                                                      | 0.0691  | 0.4765 |
| JW1222 | rssA | putative patatin-like family phospholipase                                                                  | -0.0665 | 0.0293 |
| JW1223 | rssB | PcnB-degradosome interaction factor; response regulator                                                     | 0.1137  | 0.0002 |
| JW1225 | hns  | global DNA-binding transcriptional dual regulator H-NS                                                      | -0.1013 | 0.0005 |
| JW1226 | tdk  | thymidine kinase/deoxyuridine kinase                                                                        | 0.1006  | 0.0050 |
| JW1228 | adhE | fused acetaldehyde-CoA dehydrogenase/iron-dependent alcohol dehydrogenase/pyruvate-formate lyase deactivase | 0.0438  | 0.3920 |
| JW1229 | ychE | UPF0056 family inner membrane protein                                                                       | -0.0909 | 0.0240 |
| JW1235 | oppA | oligopeptide ABC transporter periplasmic binding protein                                                    | 0.0038  | 0.7949 |
| JW1236 | oppB | oligopeptide ABC transporter permease                                                                       | 0.0247  | 0.2818 |
| JW1237 | oppC | oligopeptide ABC transporter permease                                                                       | -0.0154 | 0.6764 |
| JW1238 | oppD | oligopeptide ABC transporter ATPase                                                                         | 0.0304  | 0.4045 |
| JW1239 | oppF | oligopeptide ABC transporter ATPase                                                                         | -0.0006 | 0.9836 |

|        |      |                                                                                                                                                                                                       |         |        |
|--------|------|-------------------------------------------------------------------------------------------------------------------------------------------------------------------------------------------------------|---------|--------|
| JW1240 | yciU | UPF0263 family protein                                                                                                                                                                                | -0.0301 | 0.1265 |
| JW1241 | cls  | cardiolipin synthase 1                                                                                                                                                                                | -0.0674 | 0.0022 |
| JW1242 | kch  | voltage-gated potassium channel                                                                                                                                                                       | 0.0630  | 0.0652 |
| JW1243 | yciI | putative DGPF domain-containing enzyme                                                                                                                                                                | -0.0420 | 0.0650 |
| JW1245 | yciA | acyl-CoA esterase                                                                                                                                                                                     | -0.0817 | 0.0023 |
| JW1246 | yciB | IspA family inner membrane protein                                                                                                                                                                    | 0.0603  | 0.0923 |
| JW1247 | yciC | UPF0259 family inner membrane protein                                                                                                                                                                 | -0.0648 | 0.0006 |
| JW1248 | ompW | outer membrane protein W                                                                                                                                                                              | 0.1261  | 0.0034 |
| JW1249 | yciE | putative rubrerythrin/ferritin-like metal-binding protein                                                                                                                                             | -0.0363 | 0.0419 |
| JW1250 | yciF | putative rubrerythrin/ferritin-like metal-binding protein                                                                                                                                             | -0.0047 | 0.8375 |
| JW1251 | yciG | KGG family protein                                                                                                                                                                                    | -0.0015 | 0.9536 |
| JW1252 | trpA | tryptophan synthase, alpha subunit                                                                                                                                                                    | -0.3403 | 0.1171 |
| JW1253 | trpB | tryptophan synthase, beta subunit                                                                                                                                                                     | 0.2808  | 0.0008 |
| JW1254 | trpC | indole-3-glycerolphosphate synthetase and N-(5-phosphoribosyl)anthranilate isomerase fused glutamine amidotransferase (component II) of anthranilate synthase/anthranilate phosphoribosyl transferase | 0.0207  | 0.7431 |
| JW1255 | trpD | synthase/anthranilate phosphoribosyl transferase                                                                                                                                                      | 0.2617  | 0.0029 |
| JW1256 | trpE | component I of anthranilate synthase                                                                                                                                                                  | -0.0849 | 0.0521 |
| JW1257 | trpL | trp operon leader peptide                                                                                                                                                                             | -0.0079 | 0.6706 |
| JW1258 | yciV | PHP domain protein                                                                                                                                                                                    | 0.0243  | 0.3601 |
| JW1261 | rluB | 23S rRNA pseudouridine(2605) synthase                                                                                                                                                                 | 0.0074  | 0.7791 |
| JW1262 | btuR | cob(I)yrinic acid a,c-diamide adenosyltransferase                                                                                                                                                     | 0.0398  | 0.1206 |
| JW1263 | yciK | putative EmrKY-TolC system oxoacyl-(acyl carrier protein) reductase                                                                                                                                   | -0.1168 | 0.0000 |
| JW1264 | sohB | inner membrane protein, S49 peptidase family protein                                                                                                                                                  | 0.0473  | 0.1795 |
| JW1265 | yciN | DUF2498 protein YciN                                                                                                                                                                                  | -0.0153 | 0.3923 |
| JW1267 | cysB | N-acetylserine-responsive cysteine regulon transcriptional activator; autorepressor                                                                                                                   | 0.0140  | 0.5768 |
| JW1268 | acnA | aconitate hydratase 1; aconitase A                                                                                                                                                                    | -0.0318 | 0.1385 |
| JW1270 | pgpB | phosphatidylglycerophosphatase B                                                                                                                                                                      | 0.0435  | 0.0268 |
| JW1271 | yciS | DUF1049 family inner membrane protein, function unknown                                                                                                                                               | -0.0508 | 0.0879 |
| JW1272 | yciM | LPS regulatory protein; putative modulator of LpxC proteolysis                                                                                                                                        | -0.0622 | 0.0910 |
| JW1273 | pyrF | orotidine-5'-phosphate decarboxylase                                                                                                                                                                  | 0.1547  | 0.0016 |
| JW1274 | yciH | initiation factor function partial mimic, SUI1 family                                                                                                                                                 | 0.0228  | 0.2904 |
| JW1275 | osmB | osmotically and stress inducible lipoprotein                                                                                                                                                          | 0.1322  | 0.0017 |
| JW1276 | yciT | global regulator of transcription; DeoR family                                                                                                                                                        | 0.2124  | 0.0008 |

|        |      |                                                                                             |         |        |
|--------|------|---------------------------------------------------------------------------------------------|---------|--------|
| JW1278 | gmr  | cyclic-di-GMP phosphodiesterase; csgD regulator; modulator of RNase II stability            | -0.0146 | 0.6926 |
| JW1279 | rmb  | ribonuclease II                                                                             | 0.0326  | 0.0125 |
| JW1282 | ycjD | DUF559 family endonuclease-related protein                                                  | 0.0000  | 0.9986 |
| JW1283 | sapF | antimicrobial peptide ABC transporter ATPase                                                | -0.0370 | 0.1225 |
| JW1284 | sapD | antimicrobial peptide ABC transporter ATPase                                                | 0.0355  | 0.4976 |
| JW1285 | sapC | antimicrobial peptide transport ABC transporter permease                                    | 0.0673  | 0.0416 |
| JW1286 | sapB | antimicrobial peptide transport ABC transporter permease                                    | -0.0054 | 0.8001 |
| JW1287 | sapA | antimicrobial peptide transport ABC transporter periplasmic binding protein                 | -0.0817 | 0.0751 |
| JW1288 | ymjA | DUF2543 family protein                                                                      | 0.0173  | 0.1633 |
| JW1289 | puuP | putrescine importer                                                                         | -0.0037 | 0.9482 |
| JW1291 | puuD | gamma-glutamyl-gamma-aminobutyrate hydrolase                                                | 0.0670  | 0.1856 |
| JW1292 | puuR | repressor for the divergent puu operons, putrescine inducible                               | -0.0821 | 0.0200 |
| JW1293 | puuC | gamma-glutamyl-gamma-aminobutyraldehyde dehydrogenase; succinate semialdehyde dehydrogenase | 0.0830  | 0.0112 |
| JW1294 | puuB | gamma-glutamylputrescine oxidoreductase                                                     | -0.0291 | 0.1614 |
| JW1295 | puuE | 4-aminobutyrate aminotransferase, PLP-dependent                                             | 0.0054  | 0.9046 |
| JW1296 | pspF | psp operon transcriptional activator                                                        | 0.0399  | 0.1914 |
| JW1297 | pspA | regulatory protein for phage-shock-protein operon                                           | -0.1176 | 0.0170 |
| JW1298 | pspB | psp operon transcription co-activator                                                       | 0.0101  | 0.7089 |
| JW1299 | pspC | psp operon transcription co-activator                                                       | 0.0287  | 0.3307 |
| JW1300 | pspD | peripheral inner membrane phage-shock protein                                               | -0.0474 | 0.2926 |
| JW1301 | pspE | thiosulfate:cyanide sulfurtransferase (rhodanese)                                           | 0.0089  | 0.7322 |
| JW1302 | ycjM | alpha amylase catalytic domain family protein                                               | -0.0319 | 0.3529 |
| JW1303 | ycjN | putative ABC sugar transporter periplasmic binding protein                                  | -0.0030 | 0.9577 |
| JW1304 | ycjO | putative sugar ABC transporter permease                                                     | 0.1201  | 0.2984 |
| JW1305 | ycjP | putative sugar ABC transporter permease                                                     | -0.0739 | 0.0604 |
| JW1306 | ycjQ | putative Zn-dependent NAD(P)-binding oxidoreductase                                         | 0.0173  | 0.4068 |
| JW1308 | ycjS | putative NADH-binding oxidoreductase                                                        | -0.0076 | 0.8406 |
| JW1309 | ycjT | putative family 65 glycosyl hydrolase                                                       | -0.0596 | 0.0978 |

|        |      |                                                                                                                      |         |        |
|--------|------|----------------------------------------------------------------------------------------------------------------------|---------|--------|
| JW1310 | ycjU | beta-phosphoglucomutase                                                                                              | -0.1092 | 0.3932 |
| JW1311 | ycjV | pseudogene                                                                                                           | 0.0687  | 0.0659 |
| JW1312 | ompG | outer membrane porin G                                                                                               | 0.2035  | 0.0060 |
| JW1313 | ycjW | LacI family putative transcriptional repressor                                                                       | 0.0383  | 0.2253 |
| JW1314 | ycjX | DUF463 family protein, putative P-loop NTPase                                                                        | 0.0591  | 0.2420 |
| JW1315 | ycjF | UPF0283 family inner membrane protein                                                                                | 0.0093  | 0.7069 |
| JW1316 | tyrR | aromatic amino acid biosynthesis and transport regulon transcriptional regulator; autorepressor; ATPase; phosphatase | -0.0110 | 0.5756 |
| JW1317 | tpx  | lipid hydroperoxide peroxidase                                                                                       | -0.0268 | 0.1560 |
| JW1318 | ycjG | L-Ala-D/L-Glu epimerase                                                                                              | -0.0120 | 0.3970 |
| JW1319 | mpaA | murein peptide amidase A                                                                                             | 0.0673  | 0.0449 |
| JW1321 | ycjZ | murein peptide degradation regulator                                                                                 | -0.0501 | 0.0285 |
| JW1322 | mppA | murein tripeptide (L-ala-gamma-D-glutamyl-meso-DAP) transporter subunit                                              | -0.0793 | 0.0027 |
| JW1326 | ynaJ | DUF2534 family putative inner membrane protein                                                                       | -0.0858 | 0.0331 |
| JW1327 | uspE | stress-induced protein                                                                                               | -0.0155 | 0.5843 |
| JW1328 | fnr  | oxygen-sensing anaerobic growth regulon transcriptional regulator FNR; autorepressor                                 | -0.1486 | 0.0028 |
| JW1329 | ogt  | O-6-alkylguanine-DNA:cysteine-protein methyltransferase                                                              | 0.1437  | 0.0005 |
| JW1331 | abgB | p-aminobenzoyl-glutamate hydrolase, B subunit                                                                        | 0.0189  | 0.0902 |
| JW1333 | abgR | putative DNA-binding transcriptional regulator of abgABT operon                                                      | -0.0678 | 0.0004 |
| JW1334 | ydaL | DNA endonuclease                                                                                                     | -0.0682 | 0.0159 |
| JW1336 | ydaN | putative Zn(II) transporter                                                                                          | 0.0348  | 0.1822 |
| JW1337 | dbpA | ATP-dependent RNA helicase, specific for 23S rRNA                                                                    | -0.1538 | 0.2165 |
| JW1338 | ydaO | tRNA s(2)C32 thioltransferase, iron-sulfur cluster protein                                                           | 0.1680  | 0.0905 |
| JW1339 | intR | Rac prophage; integrase                                                                                              | -0.0252 | 0.2626 |
| JW1341 | ydaC | DUF1187 family protein, Rac prophage; putative double-strand break reduction protein                                 | -0.0512 | 0.0854 |
| JW1343 | recT | Rac prophage; recombination and repair protein                                                                       | 0.2470  | 0.0221 |
| JW1344 | recE | Rac prophage; exonuclease VIII, 5' to 3' specific dsDNA exonuclease                                                  | 0.0858  | 0.0432 |
| JW1345 | racC | Rac prophage; uncharacterized protein                                                                                | -0.0252 | 0.4458 |
| JW1346 | ydaE | conserved protein, Rac prophage                                                                                      | 0.0866  | 0.0000 |
| JW1347 | kil  | killing protein, Rac prophage; FtsZ inhibitor protein                                                                | 0.0543  | 0.0163 |

|        |      |                                                                        |         |        |
|--------|------|------------------------------------------------------------------------|---------|--------|
| JW1349 | ydaF | uncharacterized protein, Rac prophage                                  | -0.0047 | 0.9678 |
| JW1352 | ydaS | Rac prophage; putative DNA-binding transcriptional regulator           | 0.2164  | 0.0000 |
| JW1353 | ydaT | Rac prophage; uncharacterized protein                                  | -0.0234 | 0.1925 |
| JW1354 | ydaU | Rac prophage; conserved protein                                        | 0.0032  | 0.8309 |
| JW1355 | ydaV | Rac prophage; putative DNA replication protein                         | 0.0615  | 0.3359 |
| JW1358 | trkG | Rac prophage; potassium transporter subunit                            | -0.0991 | 0.0781 |
| JW1359 | ynaK | Rac prophage; conserved protein                                        | -0.0329 | 0.1100 |
| JW1361 | ynaA | Rac prophage; pseudogene, tail protein family                          | -0.0285 | 0.2635 |
| JW1366 | stfR | Rac prophage; putative tail fiber protein                              | 0.0287  | 0.1034 |
| JW1367 | tfaR | Rac prophage; putative tail fiber assembly protein                     | 0.0400  | 0.1029 |
| JW1368 | pinR | Rac prophage; putative site-specific recombinase                       | -0.0741 | 0.0808 |
| JW1369 | ynaE | cold shock protein, Rac prophage                                       | -0.0020 | 0.8735 |
| JW1370 | uspF | stress-induced protein, ATP-binding protein                            | 0.0471  | 0.0571 |
| JW1371 | ompN | outer membrane pore protein N, non-specific                            | -0.0075 | 0.8032 |
| JW1372 | ydbK | pyruvate-flavodoxin oxidoreductase                                     | -0.0103 | 0.6843 |
| JW1374 | hslJ | heat-inducible lipoprotein involved in novobiocin resistance           | 0.0235  | 0.6204 |
| JW1375 | ldhA | fermentative D-lactate dehydrogenase, NAD-dependent                    | -0.0388 | 0.0406 |
| JW1376 | ydbH | putative membrane-anchored protein, function unknown                   | 0.0326  | 0.2856 |
| JW1377 | ynbE | lipoprotein                                                            | -0.0576 | 0.0106 |
| JW1379 | feaR | transcriptional activator for tynA and feaB                            | 0.0366  | 0.2357 |
| JW1380 | feaB | phenylacetaldehyde dehydrogenase                                       | 0.0463  | 0.1498 |
| JW1381 | tynA | tyramine oxidase, copper-requiring oxepin-CoA hydrolase and 3-oxo-5,6- | 0.0920  | 0.0010 |
| JW1382 | maoC | dehydrosuberyl-CoA semialdehyde dehydrogenase                          | -0.0941 | 0.0033 |
| JW1383 | paaA | ring 1,2-phenylacetyl-CoA epoxidase subunit                            | -0.1905 | 0.0692 |
| JW1384 | paaB | putative ring 1,2-phenylacetyl-CoA epoxidase subunit                   | 0.0114  | 0.9013 |
| JW1385 | paaC | ring 1,2-phenylacetyl-CoA epoxidase subunit                            | 0.1105  | 0.0656 |
| JW1387 | paaE | ring 1,2-phenylacetyl-CoA epoxidase, NAD(P)H oxidoreductase component  | 0.0748  | 0.0313 |
| JW1388 | paaF | 2,3-dehydroadipyl-CoA hydratase                                        | 0.0892  | 0.1442 |
| JW1389 | paaG | 1,2-epoxyphenylacetyl-CoA isomerase, oxepin-CoA-forming                | 0.0194  | 0.6252 |
| JW1390 | paaH | 3-hydroxyadipyl-CoA dehydrogenase, NAD <sup>+</sup> -dependent         | -0.1078 | 0.0042 |

|        |      |                                                                                                                                                    |         |        |
|--------|------|----------------------------------------------------------------------------------------------------------------------------------------------------|---------|--------|
| JW1392 | paaJ | 3-oxoadipyl-CoA/3-oxo-5,6-dehydrosuberyl-CoA thiolase                                                                                              | 0.0827  | 0.0056 |
| JW1394 | paaX | transcriptional repressor of phenylacetic acid degradation paa operon, phenylacetyl-CoA inducer                                                    | 0.0221  | 0.7524 |
| JW1395 | paaY | thioesterase required for phenylacetic acid degradation; trimeric; phenylacetate regulatory and detoxification protein; hexapeptide repeat protein | 0.0709  | 0.0074 |
| JW1402 | ydbA | Putative exported protein                                                                                                                          | 0.0373  | 0.2552 |
| JW1403 | ydbC | pyridoxine 4-dehydrogenase                                                                                                                         | 0.0617  | 0.2376 |
| JW1405 | ynbA | inner membrane protein                                                                                                                             | -0.0335 | 0.3491 |
| JW1406 | ynbB | putative CDP-diglyceride synthase                                                                                                                  | 0.0143  | 0.6866 |
| JW1407 | ynbC | putative esterase                                                                                                                                  | 0.0013  | 0.9648 |
| JW1408 | ynbD | putative phosphatase inner membrane protein                                                                                                        | 0.0206  | 0.3165 |
| JW1409 | azoR | NADH-azoreductase, FMN-dependent                                                                                                                   | 0.0528  | 0.0390 |
| JW1411 | ydcF | DUF218 superfamily protein, SAM-binding                                                                                                            | -0.0111 | 0.6581 |
| JW1412 | aldA | aldehyde dehydrogenase A, NAD-linked                                                                                                               | 0.0571  | 0.0036 |
| JW1413 | gapC | Uncharacterized protein                                                                                                                            | -0.0394 | 0.5064 |
| JW1416 | ydcA | putative periplasmic protein                                                                                                                       | 0.0532  | 0.0196 |
| JW1417 | trg  | methyl-accepting chemotaxis protein III, ribose and galactose sensor receptor                                                                      | 0.0385  | 0.3236 |
| JW1419 | ydcJ | putative metalloenzyme                                                                                                                             | 0.0119  | 0.7184 |
| JW1420 | mdoD | OPG biosynthetic periplasmic protein                                                                                                               | 0.0202  | 0.6792 |
| JW1423 | rimL | ribosomal-protein-L7/L12-serine acetyltransferase                                                                                                  | 0.1999  | 0.0380 |
| JW1424 | ydcK | uncharacterized protein                                                                                                                            | -0.0174 | 0.3937 |
| JW1425 | tehA | potassium-tellurite ethidium and proflavin transporter                                                                                             | 0.0575  | 0.1079 |
| JW1426 | tehB | tellurite, selenium methyltransferase, SAM-dependent; tellurite, selenium resistance protein                                                       | -0.0348 | 0.1905 |
| JW1427 | ydcL | lipoprotein                                                                                                                                        | 0.0270  | 0.3483 |
| JW1430 | ydcN | putative DNA-binding transcriptional regulator                                                                                                     | -0.0028 | 0.9595 |
| JW1431 | ydcP | putative peptidase                                                                                                                                 | 0.0191  | 0.4411 |
| JW1432 | yncJ | uncharacterized protein                                                                                                                            | -0.2186 | 0.0596 |
| JW1433 | ydcQ | antitoxin for the HicAB toxin-antitoxin system                                                                                                     | 0.0052  | 0.8184 |
| JW1434 | ydcR | putative DNA-binding transcriptional regulator and putative aminotransferase                                                                       | 0.0427  | 0.4032 |
| JW1435 | ydcS | putative ABC transporter periplasmic binding protein                                                                                               | 0.1165  | 0.0036 |
| JW1436 | ydcT | putative ABC transporter ATPase                                                                                                                    | 0.0292  | 0.5275 |
| JW1437 | ydcU | putative ABC transporter permease                                                                                                                  | 0.0065  | 0.8722 |

|        |      |                                                                                                                       |         |        |
|--------|------|-----------------------------------------------------------------------------------------------------------------------|---------|--------|
| JW1438 | ydcV | putative ABC transporter permease                                                                                     | -0.1655 | 0.0013 |
| JW1439 | ydcW | gamma-aminobutyraldehyde dehydrogenase                                                                                | 0.0122  | 0.5799 |
| JW1441 | ydcY | DUF2526 family protein                                                                                                | 0.0059  | 0.7635 |
| JW1442 | ydcZ | DUF606 family inner membrane protein                                                                                  | 0.0493  | 0.0242 |
| JW1445 | yncC | colanic acid and biofilm gene transcriptional regulator, MqsR-controlled                                              | -0.0844 | 0.0434 |
| JW1446 | yncD | putative iron outer membrane transporter                                                                              | -0.0181 | 0.4755 |
| JW1447 | yncE | ATP-binding protein, periplasmic, function unknown                                                                    | 0.0011  | 0.9582 |
| JW1449 | yncG | glutathione S-transferase homolog                                                                                     | -0.0416 | 0.0840 |
| JW1451 | rhsE | pseudogene, Rhs family                                                                                                | 0.0148  | 0.6993 |
| JW1452 | ydcD | putative immunity protein for RhsE                                                                                    | -0.0027 | 0.8916 |
| JW1453 | yncI | pseudogene                                                                                                            | -0.0398 | 0.1510 |
| JW1455 | ydcC | H repeat-associated putative transposase                                                                              | 0.0650  | 0.0002 |
| JW1456 | ydcE | 4-oxalocrotonate tautomerase                                                                                          | -0.0020 | 0.9463 |
| JW1457 | yddH | flavin reductase like-protein                                                                                         | -0.0904 | 0.0676 |
| JW1458 | nhoA | N-hydroxyarylamine O-acetyltransferase                                                                                | -0.0658 | 0.0801 |
| JW1459 | yddE | PhzC-PhzF family protein                                                                                              | 0.0082  | 0.7042 |
| JW1460 | narV | nitrate reductase 2 (NRZ), gamma subunit                                                                              | -0.0045 | 0.8730 |
| JW1461 | narW | nitrate reductase 2 (NRZ), delta subunit (assembly subunit)                                                           | 0.0051  | 0.8597 |
| JW1462 | narY | nitrate reductase 2 (NRZ), beta subunit                                                                               | 0.0229  | 0.6023 |
| JW1463 | narZ | nitrate reductase 2 (NRZ), alpha subunit                                                                              | 0.0425  | 0.3742 |
| JW1464 | narU | nitrate/nitrite transporter                                                                                           | 0.0569  | 0.2438 |
| JW1466 | yddJ | Uncharacterized protein                                                                                               | 0.0743  | 0.0075 |
| JW1467 | yddK | pseudogene, leucine-rich protein                                                                                      | -0.0449 | 0.0895 |
| JW1468 | yddL | putative lipoprotein                                                                                                  | -0.0162 | 0.8199 |
| JW1469 | yddG | aromatic amino acid exporter                                                                                          | 0.0713  | 0.0139 |
| JW1471 | fdnH | formate dehydrogenase-N, Fe-S (beta) subunit, nitrate-inducible                                                       | -0.0210 | 0.2320 |
| JW1472 | fdnI | formate dehydrogenase-N, cytochrome B556 (gamma) subunit, nitrate-inducible                                           | -0.0033 | 0.9069 |
| JW1474 | adhP | ethanol-active dehydrogenase/acetaldehyde-active reductase                                                            | -0.0448 | 0.3758 |
| JW1477 | osmC | lipoyl-dependent Cys-based peroxidase, hydroperoxide resistance; salt-shock inducible membrane protein; peroxiredoxin | 0.1115  | 0.0020 |
| JW1478 | ddpF | D,D-dipeptide ABC transporter ATPase                                                                                  | 0.1300  | 0.0004 |
| JW1479 | ddpD | D,D-dipeptide ABC transporter ATPase                                                                                  | 0.1150  | 0.1572 |
| JW1480 | ddpC | D,D-dipeptide ABC transporter permease                                                                                | 0.1175  | 0.4346 |
| JW1481 | ddpB | D,D-dipeptide ABC transporter permease                                                                                | -0.0468 | 0.2877 |



|        |      |                                                                                                                 |         |        |
|--------|------|-----------------------------------------------------------------------------------------------------------------|---------|--------|
| JW1483 | ddpX | D-ala-D-ala dipeptidase, Zn-dependent                                                                           | -0.0656 | 0.0406 |
| JW1484 | dos  | oxygen sensor, c-di-GMP phosphodiesterase, heme-regulated; cold- and stationary phase-induced biofilm regulator | -0.0223 | 0.3260 |
| JW1486 | yddW | lipotein, glycosyl hydrolase homolog                                                                            | 0.0042  | 0.9289 |
| JW1487 | gadC | glutamate:gamma-aminobutyric acid antiporter                                                                    | -0.1261 | 0.1392 |
| JW1488 | gadB | glutamate decarboxylase B, PLP-dependent                                                                        | -0.0116 | 0.8282 |
| JW1489 | pqqL | putative periplasmic M16 family zinc metalloendopeptidase                                                       | -0.3706 | 0.0095 |
| JW1490 | yddB | putative TonB-dependent outer membrane receptor                                                                 | -0.0473 | 0.1938 |
| JW1492 | ydeM | putative YdeN-specific sulfatase-maturing enzyme                                                                | -0.0306 | 0.5958 |
| JW1494 | ydeO | UV-inducible global regulator, EvgA-, GadE-dependent                                                            | 0.1164  | 0.0001 |
| JW1495 | ydeP | putative oxidoreductase                                                                                         | 0.0010  | 0.9094 |
| JW1496 | ydeQ | putative fimbrial-like adhesin protein                                                                          | -0.0544 | 0.0432 |
| JW1497 | ydeR | putative fimbrial-like adhesin protein                                                                          | 0.0919  | 0.0006 |
| JW1498 | ydeS | putative fimbrial-like adhesin protein                                                                          | 0.0029  | 0.8755 |
| JW1499 | ydeT | pseudogene                                                                                                      | 0.0039  | 0.9347 |
| JW1500 | hipA | inactivating GltX kinase facilitating persister formation; toxin of HipAB TA pair; autokinase                   | 0.0273  | 0.2617 |
| JW1501 | hipB | antitoxin of HipAB toxin-antitoxin system                                                                       | 0.1143  | 0.0001 |
| JW1502 | ydeU | Uncharacterized protein                                                                                         | -0.0654 | 0.0944 |
| JW1503 | ydeK | pseudogene, AidA homolog                                                                                        | -0.0646 | 0.0001 |
| JW1504 | ydeV | autoinducer-2 (AI-2) kinase                                                                                     | 0.0960  | 0.0005 |
| JW1505 | ydeW | lsr operon transcriptional repressor                                                                            | 0.0159  | 0.4853 |
| JW1506 | ego  | autoinducer 2 import ATP-binding protein                                                                        | 0.0756  | 0.1785 |
| JW1507 | lsrC | autoinducer 2 import system permease protein                                                                    | -0.0387 | 0.2066 |
| JW1508 | lsrD | autoinducer 2 import system permease protein                                                                    | 0.0157  | 0.4888 |
| JW1509 | lsrB | autoinducer 2-binding protein                                                                                   | -0.1057 | 0.0268 |
| JW1510 | lsrF | putative autoinducer-2 (AI-2) aldolase                                                                          | -0.3726 | 0.0014 |
| JW1511 | lsrG | autoinducer-2 (AI-2) degrading protein LsrG                                                                     | -0.0236 | 0.1367 |
| JW1512 | tam  | trans-aconitate methyltransferase                                                                               | -0.0479 | 0.0287 |
| JW1514 | uxaB | altronate oxidoreductase, NAD-dependent                                                                         | -0.0814 | 0.0080 |
| JW1516 | yneG | DUF4186 family protein                                                                                          | -0.0250 | 0.4486 |
| JW1517 | yneH | glutaminase 2                                                                                                   | 0.0020  | 0.9637 |
| JW1519 | yneJ | putative DNA-binding transcriptional regulator                                                                  | -0.0531 | 0.0374 |
| JW1520 | yneK | uncharacterized protein                                                                                         | -0.0438 | 0.1145 |

|        |      |                                                                              |         |        |
|--------|------|------------------------------------------------------------------------------|---------|--------|
| JW1521 | ydeA | arabinose efflux transporter, arabinose-inducible                            | 0.0123  | 0.6403 |
| JW1522 | marC | UPF0056 family inner membrane protein                                        | -0.0185 | 0.2949 |
| JW1525 | marB | periplasmic mar operon regulator                                             | -0.0671 | 0.0436 |
| JW1527 | ydeE | putative transporter                                                         | -0.0533 | 0.0064 |
| JW1528 | ydeH | diguanylate cyclase, zinc-sensing                                            | 0.0191  | 0.6460 |
| JW1529 | ydeI | hydrogen peroxide resistance OB fold protein; putative periplasmic protein   | 0.0301  | 0.0110 |
| JW1530 | ydeJ | inactive PncC family protein                                                 | 0.0768  | 0.0199 |
| JW1531 | dcp  | dipeptidyl carboxypeptidase II                                               | -0.0135 | 0.7332 |
| JW1532 | ydfG | NADP-dependent 3-hydroxy acid dehydrogenase; malonic semialdehyde reductase  | -0.0218 | 0.4082 |
| JW1533 | ydfH | transcriptional repressor for <i>rspAB</i>                                   | -0.0477 | 0.0307 |
| JW1534 | ydfZ | selenoprotein, function unknown                                              | 0.0039  | 0.8888 |
| JW1535 | ydfI | putative NAD-dependent D-mannonate oxidoreductase                            | 0.0016  | 0.9618 |
| JW1536 | ydfJ | pseudogene, MFS transporter family; interrupted by Qin prophage              | 0.0514  | 0.0608 |
| JW1537 | ydfK | cold shock protein, function unknown, Qin prophage                           | 0.0419  | 0.2412 |
| JW1538 | pinQ | Qin prophage; putative site-specific recombinase                             | 0.0076  | 0.7003 |
| JW1539 | tfaQ | Qin prophage; putative tail fibre assembly protein                           | -0.0757 | 0.0290 |
| JW1540 | stfQ | Qin prophage; putative side tail fibre assembly protein                      | 0.0502  | 0.0223 |
| JW1541 | nohA | pseudogene, Qin prophage; Phage DNA packaging protein Nu1 family             | -0.1494 | 0.0010 |
| JW1545 | ydfP | Qin prophage; Rz-like protein                                                | -0.0072 | 0.7374 |
| JW1546 | ydfQ | Qin prophage; putative lysozyme                                              | 0.0240  | 0.2452 |
| JW1547 | ydfR | Qin prophage; DUF1327 family protein                                         | 0.0082  | 0.6511 |
| JW1549 | cspB | Qin prophage; cold shock protein                                             | -0.0243 | 0.1268 |
| JW1550 | cspF | Qin prophage; cold shock protein                                             | -0.0714 | 0.0905 |
| JW1551 | ydfT | Qin prophage; putative antitermination protein Q                             | 0.0987  | 0.0006 |
| JW1553 | rem  | Qin prophage; uncharacterized protein                                        | -0.0385 | 0.4730 |
| JW1554 | hokD | Qin prophage; small toxic polypeptide                                        | -0.1910 | 0.0067 |
| JW1555 | relE | Qin prophage; toxin of the RelE-RelB toxin-antitoxin system                  | 0.0267  | 0.2330 |
| JW1556 | relB | antitoxin of the RelE-RelB toxin-antitoxin system; transcriptional repressor | 0.0584  | 0.1383 |
| JW1557 | ydfV | Qin prophage; uncharacterized protein                                        | 0.0431  | 0.0819 |
| JW1558 | flxA | Qin prophage; uncharacterized protein                                        | 0.1194  | 0.0088 |
| JW1559 | ydfW | pseudogene, integrase fragment, Qin prophage                                 | 0.1457  | 0.0037 |
| JW1560 | ydfX | pseudogene, Qin prophage                                                     | 0.0405  | 0.1474 |
| JW1561 | dicC | Qin prophage; DNA-binding transcriptional regulator for DicB                 | 0.2209  | 0.0151 |

|        |      |                                                                               |         |        |
|--------|------|-------------------------------------------------------------------------------|---------|--------|
| JW1563 | ydfA | Qin prophage; DUF1391 family protein                                          | 0.0001  | 0.9952 |
| JW1565 | ydfC | Qin prophage; uncharacterized protein                                         | -0.0189 | 0.4124 |
| JW1566 | dicB | Qin prophage; cell division inhibition protein                                | 0.0814  | 0.1250 |
| JW1567 | ydfD | Qin prophage; DUF1482 family protein                                          | -0.0131 | 0.5511 |
| JW1568 | ydfE | Qin prophage; pseudogene                                                      | -0.0078 | 0.7687 |
| JW1571 | intQ | pseudogene, Qin prophage; phage integrase family                              | 0.0161  | 0.4884 |
| JW1572 | rspB | putative Zn-dependent NAD(P)-binding oxidoreductase                           | 0.0090  | 0.7569 |
| JW1573 | rspA | bifunctional D-altronate/D-mannonate dehydratase                              | -0.0172 | 0.6832 |
| JW1574 | ynfA | UPF0060 family inner membrane protein                                         | 0.0011  | 0.9644 |
| JW1575 | ynfB | UPF0482 family putative periplasmic protein                                   | 0.0541  | 0.2658 |
| JW1576 | speG | spermidine N(1)-acetyltransferase                                             | 0.0399  | 0.7060 |
| JW1579 | ynfE | putative selenate reductase, periplasmic                                      | -0.0173 | 0.3684 |
| JW1581 | ynfG | oxidoreductase, Fe-S subunit                                                  | 0.0119  | 0.5237 |
| JW1586 | dgsA | glucosamine anaerobic growth regulon transcriptional repressor; autorepressor | 0.0117  | 0.1452 |
| JW1587 | ynfL | LysR family putative transcriptional regulator                                | 0.0188  | 0.6686 |
| JW1588 | ynfM | putative arabinose efflux transporter                                         | 0.0385  | 0.4674 |
| JW1590 | ydgD | putative peptidase                                                            | 0.0500  | 0.1169 |
| JW1591 | mdtI | multidrug efflux system transporter                                           | 0.0266  | 0.0869 |
| JW1592 | mdtJ | multidrug efflux system transporter                                           | -0.0227 | 0.2674 |
| JW1593 | ydgG | pheromone AI-2 transporter                                                    | -0.1575 | 0.1928 |
| JW1594 | pntB | pyridine nucleotide transhydrogenase, beta subunit                            | 0.0343  | 0.3995 |
| JW1595 | pntA | pyridine nucleotide transhydrogenase, alpha subunit                           | -0.0614 | 0.0336 |
| JW1596 | ydgH | DUF1471 family periplasmic protein                                            | -0.1508 | 0.0027 |
| JW1597 | ydgI | putative arginine/ornithine antiporter transporter                            | -0.0741 | 0.2397 |
| JW1598 | folM | dihydrimonapterin reductase, NADPH-dependent; dihydrofolate reductase isozyme | 0.0685  | 0.0149 |
| JW1599 | ydgC | GlpM family inner membrane protein                                            | 0.0000  | 0.9990 |
| JW1600 | rstA | response regulator of RstAB two-component system                              | 0.0847  | 0.0017 |
| JW1601 | rstB | sensory histidine kinase of RstAB two-component system                        | 0.0015  | 0.9254 |
| JW1602 | tus  | inhibitor of replication at Ter, DNA-binding protein                          | 0.0489  | 0.0241 |
| JW1603 | fumC | fumarate hydratase (fumarase C), aerobic Class II                             | -0.0088 | 0.8098 |
| JW1604 | fumA | fumarate hydratase (fumarase A), aerobic Class I                              | -0.0152 | 0.7502 |
| JW1605 | manA | mannose-6-phosphate isomerase                                                 | -0.0026 | 0.9085 |

|        |      |                                                                                                                                     |         |        |
|--------|------|-------------------------------------------------------------------------------------------------------------------------------------|---------|--------|
| JW1606 | ydgA | DUF945 family protein                                                                                                               | -0.0718 | 0.0300 |
| JW1607 | uidC | putative outer membrane porin for beta-glucuronides porin protein                                                                   | 0.0856  | 0.0025 |
| JW1608 | uidB | glucuronide transporter                                                                                                             | 0.0425  | 0.1476 |
| JW1609 | uidA | beta-D-glucuronidase                                                                                                                | 0.0392  | 0.1623 |
| JW1610 | uidR | transcriptional repressor                                                                                                           | -0.0391 | 0.0507 |
| JW1611 | hdhA | 7-alpha-hydroxysteroid dehydrogenase, NAD-dependent                                                                                 | 0.1152  | 0.2301 |
| JW1612 | malI | transcriptional repressor of Mal regulon                                                                                            | -0.0734 | 0.0323 |
| JW1613 | malX | maltose and glucose-specific PTS enzyme IIB component and IIC component                                                             | 0.0196  | 0.7693 |
| JW1614 | malY | PLP-dependent beta-cystathionase and maltose regulon regulator                                                                      | 0.0248  | 0.3275 |
| JW1615 | add  | adenosine deaminase                                                                                                                 | -0.2906 | 0.0165 |
| JW1617 | ydgT | nucleoid-associated oriC-binding protein; H-NS and StpA stabilizing factor                                                          | -0.0413 | 0.1656 |
| JW1619 | rsxA | SoxR iron-sulfur cluster reduction factor component; inner membrane protein of electron transport complex                           | -0.0263 | 0.2175 |
| JW1620 | rsxB | SoxR iron-sulfur cluster reduction factor component; putative iron-sulfur protein                                                   | 0.1415  | 0.1364 |
| JW1621 | rsxC | SoxR iron-sulfur cluster reduction factor component; putative membrane-associated NADH oxidoreductase of electron transport complex | -0.0566 | 0.0021 |
| JW1622 | rsxD | SoxR iron-sulfur cluster reduction factor component; putative membrane protein of electron transport complex                        | -0.0152 | 0.4641 |
| JW1623 | rsxG | SoxR iron-sulfur cluster reduction factor component; putative membrane protein of electron transport complex                        | -0.0066 | 0.9198 |
| JW1624 | rsxE | SoxR iron-sulfur cluster reduction factor component; electron transport inner membrane NADH-quinone reductase                       | -0.0258 | 0.1731 |
| JW1625 | nth  | DNA glycosylase and apyrimidinic (AP) lyase (endonuclease III)                                                                      | 0.0013  | 0.9409 |
| JW1626 | ydgR | dipeptide and tripeptide permease A                                                                                                 | -0.0031 | 0.9005 |
| JW1627 | gst  | glutathionine S-transferase                                                                                                         | -0.0675 | 0.0018 |
| JW1628 | pdxY | pyridoxamine kinase                                                                                                                 | 0.0437  | 0.2923 |
| JW1630 | pdxH | pyridoxine 5'-phosphate oxidase                                                                                                     | -0.1866 | 0.0235 |
| JW1631 | ydhA | inhibitor of c-type lysozyme, membrane-bound; putative lipoprotein                                                                  | 0.0513  | 0.1319 |
| JW1632 | ydhH | anhydro-N-acetylmuramic acid kinase                                                                                                 | 0.0302  | 0.3680 |
| JW1633 | slyB | outer membrane lipoprotein                                                                                                          | 0.0536  | 0.0161 |

|        |      |                                                                                                                                 |         |        |
|--------|------|---------------------------------------------------------------------------------------------------------------------------------|---------|--------|
| JW1635 | ydhI | DUF1656 family putative inner membrane efflux pump associated protein                                                           | 0.0453  | 0.0248 |
| JW1636 | ydhJ | putative membrane fusion protein (MFP) of YdhJK efflux pump                                                                     | 0.0525  | 0.2429 |
| JW1637 | ydhK | putative efflux protein (PET) component of YdhJK efflux pump                                                                    | -0.0122 | 0.6787 |
| JW1638 | sodC | superoxide dismutase, Cu, Zn, periplasmic                                                                                       | 0.0426  | 0.0023 |
| JW1639 | ydhF | putative oxidoreductase                                                                                                         | 0.0237  | 0.2060 |
| JW1642 | nemA | chromate reductase, quinone reductase, FMN-linked; N-Ethylmaleimide reductase; old yellow enzyme                                | -0.0067 | 0.8147 |
| JW1643 | gloA | glyoxalase I, Ni-dependent                                                                                                      | 0.0145  | 0.4765 |
| JW1644 | rnt  | RNase T; exoribonuclease T; structured DNA 3' exonuclease; RNA processing; DNA repair                                           | -0.0475 | 0.3271 |
| JW1645 | lhr  | putative ATP-dependent helicase                                                                                                 | -0.0174 | 0.6065 |
| JW1646 | ydhD | glutaredoxin-4                                                                                                                  | -0.0861 | 0.1971 |
| JW1648 | sodB | superoxide dismutase, Fe                                                                                                        | -0.0436 | 0.3129 |
| JW1649 | ydhP | putative MFS transporter, inner membrane protein                                                                                | 0.0209  | 0.3539 |
| JW1650 | purR | transcriptional repressor, hypoxanthine-binding                                                                                 | 0.0622  | 0.0233 |
| JW1651 | ydhB | LysR family putative transcriptional regulator                                                                                  | -0.1015 | 0.0086 |
| JW1652 | ydhC | putative arabinose efflux transporter                                                                                           | 0.0673  | 0.1856 |
| JW1653 | cfa  | cyclopropane fatty acyl phospholipid synthase, SAM-dependent                                                                    | 0.0818  | 0.1249 |
| JW1655 | mdtK | multidrug efflux system transporter                                                                                             | -0.0106 | 0.7530 |
| JW1656 | ydhQ | autotransporter adhesin-related protein                                                                                         | 0.0369  | 0.1033 |
| JW1657 | ydhR | putative monooxygenase                                                                                                          | -0.0057 | 0.8775 |
| JW1659 | ydhT | FNR, Nar, NarP-regulated protein; putative subunit of YdhYVWXUT oxidoreductase complex                                          | -0.0551 | 0.0051 |
| JW1660 | ydhU | putative cytochrome b subunit of YdhYVWXUT oxidoreductase complex                                                               | 0.0028  | 0.9263 |
| JW1662 | ydhW | FNR, Nar, NarP-regulated protein; putative subunit of YdhYVWXUT oxidoreductase complex                                          | -0.0204 | 0.4246 |
| JW1664 | ydhY | putative 4Fe-4S ferridoxin-type protein; FNR, Nar, NarP-regulated protein; putative subunit of YdhYVWXUT oxidoreductase complex | -0.1183 | 0.1790 |
| JW1665 | ydhZ | fumarase D                                                                                                                      | 0.0317  | 0.0591 |
| JW1666 | pykF | pyruvate kinase I                                                                                                               | 0.0100  | 0.9171 |

|        |      |                                                                                  |         |        |
|--------|------|----------------------------------------------------------------------------------|---------|--------|
| JW1667 | lpp  | murein lipoprotein                                                               | -0.3235 | 0.0014 |
| JW1668 | ynhG | murein L,D-transpeptidase                                                        | 0.0008  | 0.9885 |
| JW1669 | sufE | sulfur acceptor protein                                                          | -0.0246 | 0.3132 |
| JW1670 | sufS | cysteine desulfurase, stimulated by SufE;<br>selenocysteine lyase, PLP-dependent | 0.0005  | 0.9786 |
| JW1671 | sufD | component of SufBCD Fe-S cluster assembly<br>scaffold                            | 0.1114  | 0.0015 |
| JW1672 | sufC | SufBCD Fe-S cluster assembly scaffold<br>protein, ATP-binding protein            | 0.1188  | 0.0091 |
| JW1674 | sufA | Fe-S cluster assembly protein                                                    | 0.0786  | 0.0957 |
| JW1675 | ydiH | uncharacterized protein                                                          | 0.0117  | 0.5723 |
| JW1676 | ydiI | 1,4-dihydroxy-2-naphthoyl-CoA hydrolase                                          | -0.0083 | 0.7754 |
| JW1677 | ydiJ | putative FAD-linked oxidoreductase                                               | -0.0547 | 0.0388 |
| JW1678 | ydiK | UPF0118 family inner membrane protein                                            | 0.0084  | 0.8030 |
| JW1682 | ydiB | quininate/shikimate 5-dehydrogenase,<br>NAD(P)-binding                           | -0.0163 | 0.6885 |
| JW1683 | aroD | 3-dehydroquininate dehydratase                                                   | 0.1933  | 0.0544 |
| JW1684 | ydiF | putative acetyl-CoA:acetoacetyl-CoA<br>transferase: alpha subunit/beta subunit   | -0.0270 | 0.4113 |
| JW1686 | ydiP | putative DNA-binding transcriptional<br>regulator                                | -0.0038 | 0.9226 |
| JW1688 | ydiR | putative electron transfer flavoprotein, FAD-<br>binding subunit                 | 0.1448  | 0.0065 |
| JW1689 | ydiS | putative oxidoreductase                                                          | -0.0049 | 0.8493 |
| JW1692 | pps  | phosphoenolpyruvate synthase                                                     | -0.0102 | 0.8138 |
| JW1693 | ydiA | PEP synthase kinase and PEP synthase<br>pyrophosphorylase                        | -0.0029 | 0.8667 |
| JW1694 | aroH | 3-deoxy-D-arabino-heptulosonate-7-<br>phosphate synthase, tryptophan repressible | 0.0454  | 0.3102 |
| JW1695 | ydiE | hemin uptake protein HemP homolog                                                | 0.0476  | 0.0118 |
| JW1696 | ydiU | UPF0061 family protein                                                           | -0.0232 | 0.2358 |
| JW1697 | ydiV | anti-FlhD4C2 factor, inactive EAL family<br>phosphodiesterase                    | 0.0142  | 0.7609 |
| JW1698 | nlpC | putative C40 clan peptidase lipoprotein                                          | 0.1185  | 0.0018 |
| JW1699 | btuD | vitamin B12 ABC transporter ATPase                                               | -0.0459 | 0.2594 |
| JW1700 | btuE | glutathione peroxidase                                                           | -0.1241 | 0.0003 |
| JW1701 | btuC | vitamin B12 ABC transporter permease                                             | -0.0407 | 0.1383 |
| JW1702 | ihfA | integration host factor (IHF), DNA-binding<br>protein, alpha subunit             | 0.1454  | 0.0103 |
| JW1705 | pheM | phenylalanyl-tRNA synthetase operon<br>leader peptide                            | -0.0361 | 0.1583 |
| JW1711 | ydiY | acid-inducible putative outer membrane<br>protein                                | -0.0151 | 0.5889 |
| JW1713 | ydiZ | uncharacterized protein                                                          | -0.0042 | 0.7773 |

|        |      |                                                                                                                 |         |        |
|--------|------|-----------------------------------------------------------------------------------------------------------------|---------|--------|
| JW1714 | yniA | fructosamine kinase family protein                                                                              | -0.0023 | 0.9038 |
| JW1715 | yniB | putative inner membrane protein                                                                                 | -0.1099 | 0.0002 |
| JW1716 | yniC | hexitol phosphatase B; 2-deoxyglucose-6-P phosphatase                                                           | 0.0182  | 0.6593 |
| JW1718 | ydjN | putative transporter                                                                                            | 0.1126  | 0.0910 |
| JW1719 | ydjO | uncharacterized protein                                                                                         | -0.0632 | 0.0199 |
| JW1720 | cedA | cell division modulator                                                                                         | -0.0138 | 0.5279 |
| JW1721 | katE | catalase HP11, heme d-containing                                                                                | 0.0968  | 0.0618 |
| JW1722 | chbG | chito-oligosaccharide deacetylase                                                                               | -0.0907 | 0.0327 |
| JW1723 | chbF | phospho-chitobiase; general 6-phospho-beta-glucosidase activity                                                 | -0.1138 | 0.0057 |
| JW1724 | chbR | repressor of chb operon for N,N'-diacetylchitobiose utilization                                                 | -0.0089 | 0.5960 |
| JW1725 | chbA | N,N'-diacetylchitobiose-specific enzyme IIA component of PTS                                                    | -0.0657 | 0.1125 |
| JW1726 | chbC | N,N'-diacetylchitobiose-specific enzyme IIC component of PTS                                                    | -0.0367 | 0.2280 |
| JW1727 | chbB | N,N'-diacetylchitobiose-specific enzyme IIB component of PTS                                                    | -0.2784 | 0.0013 |
| JW1728 | osmE | osmotically-inducible lipoprotein                                                                               | -0.0739 | 0.1879 |
| JW1730 | ydjQ | endonuclease of nucleotide excision repair                                                                      | 0.0637  | 0.0152 |
| JW1731 | ydjR | cold- and stress-inducible protein                                                                              | -0.0694 | 0.0107 |
| JW1732 | spy  | periplasmic ATP-independent protein refolding chaperone, stress-induced                                         | -0.0660 | 0.0557 |
| JW1733 | astE | succinylglutamate desuccinylase                                                                                 | 0.1087  | 0.0125 |
| JW1734 | astB | succinylarginine dihydrolase                                                                                    | -0.1289 | 0.0004 |
| JW1736 | astA | arginine succinyltransferase                                                                                    | 0.1502  | 0.0012 |
| JW1737 | astC | succinylornithine transaminase, PLP-dependent                                                                   | -0.0054 | 0.7157 |
| JW1738 | xthA | exonuclease III                                                                                                 | 0.0632  | 0.0840 |
| JW1739 | ydjX | TVP38/TMEM64 family inner membrane protein                                                                      | 0.1014  | 0.0018 |
| JW1741 | ydjZ | TVP38/TMEM64 family inner membrane protein                                                                      | -0.1928 | 0.0038 |
| JW1742 | ynjA | carboxymuconolactone decarboxylase family protein                                                               | -0.0155 | 0.4857 |
| JW1747 | ynjF | CDP-alcohol phosphatidyltransferase family inner membrane protein                                               | 0.0741  | 0.1253 |
| JW1748 | nudG | CTP pyrophosphohydrolase; also hydrolyzes 2-hydroxy-dATP, 8-hydroxy-dGTP, 5-hydroxy-CTP, dCTP and 5-methyl-dCTP | -0.0169 | 0.5778 |
| JW1749 | ynjH | DUF1496 family protein                                                                                          | -0.0713 | 0.0063 |
| JW1750 | gdhA | glutamate dehydrogenase, NADP-specific                                                                          | 0.0522  | 0.0326 |
| JW1752 | topB | DNA topoisomerase III                                                                                           | 0.0229  | 0.0980 |
| JW1753 | selD | selenophosphate synthase                                                                                        | 0.0104  | 0.5210 |
| JW1754 | ydjA | putative oxidoreductase                                                                                         | 0.0520  | 0.2330 |

|        |      |                                                                  |         |        |
|--------|------|------------------------------------------------------------------|---------|--------|
| JW1755 | sppA | protease IV (signal peptide peptidase)                           | -0.0337 | 0.3327 |
| JW1756 | ansA | cytoplasmic L-asparaginase 1                                     | 0.0835  | 0.0447 |
| JW1757 | pncA | nicotinamidase/pyrazinamidase                                    | 0.0803  | 0.1087 |
| JW1758 | ydjE | putative MFS sugar transporter, membrane protein                 | -0.1397 | 0.0372 |
| JW1759 | ydjF | putative DNA-binding transcriptional regulator                   | 0.0422  | 0.1125 |
| JW1760 | ydjG | methylglyoxal reductase, NADH-dependent                          | -0.0480 | 0.0976 |
| JW1762 | ydjI | putative aldolase                                                | -0.0285 | 0.0277 |
| JW1763 | ydjJ | putative Zn-dependent NAD(P)-binding oxidoreductase              | 0.1029  | 0.0246 |
| JW1765 | ydjL | putative Zn-dependent NAD(P)-binding oxidoreductase              | 0.0960  | 0.0096 |
| JW1766 | yeaC | DUF1315 family protein                                           | -0.0530 | 0.3181 |
| JW1767 | yeaA | methionine sulfoxide reductase B                                 | -0.0526 | 0.2178 |
| JW1769 | yeaD | D-hexose-6-phosphate epimerase-like protein                      | 0.0008  | 0.9652 |
| JW1770 | yeaE | aldo-keto reductase, methylglyoxal to acetol, NADPH-dependent    | -0.0183 | 0.5087 |
| JW1771 | mipA | scaffolding protein for murein synthesizing machinery            | 0.0176  | 0.5973 |
| JW1772 | yeaG | protein kinase, endogenous substrate unidentified; autokinase    | 0.0460  | 0.0328 |
| JW1773 | yeaH | UPF0229 family protein                                           | 0.0641  | 0.3200 |
| JW1774 | yeaI | Inactive diguanylate cyclase                                     | 0.0203  | 0.2738 |
| JW1776 | yeaK | aminoacyl-tRNA editing domain protein                            | -0.0428 | 0.4278 |
| JW1778 | yeaL | UPF0756 family putative inner membrane protein                   | -0.0322 | 0.0538 |
| JW1779 | yeaM | putative DNA-binding transcriptional regulator                   | 0.0073  | 0.7494 |
| JW1780 | yeaN | putative MFS transporter, inner membrane protein                 | -0.0148 | 0.5386 |
| JW1781 | yeaO | DUF488 family protein                                            | -0.0393 | 0.1313 |
| JW1782 | yoaF | DUF333 family outer membrane lipoprotein                         | 0.0493  | 0.0951 |
| JW1784 | yeaQ | UPF0410 family protein                                           | 0.0151  | 0.5890 |
| JW1785 | yoaG | uncharacterized protein                                          | 0.0067  | 0.9126 |
| JW1786 | yeaR | DUF1971 family protein, nitrate-inducible                        | 0.0089  | 0.5897 |
| JW1787 | yeaS | leucine efflux protein                                           | -0.0759 | 0.1605 |
| JW1788 | yeaT | transcriptional activator of dmlA                                | 0.0679  | 0.0842 |
| JW1789 | yeaU | D-malate oxidase, NAD-dependent; putative tartrate dehydrogenase | -0.1027 | 0.0876 |
| JW1792 | yeaX | putative YeaWX dioxygenase beta subunit, reductase component     | 0.0317  | 0.2811 |
| JW1793 | rnd  | ribonuclease D                                                   | 0.0776  | 0.0070 |
| JW1794 | fadD | acyl-CoA synthetase (long-chain-fatty-acid--CoA ligase)          | 0.0315  | 0.1625 |
| JW1795 | yeaY | Slp family lipoprotein, RpoE-regulated                           | 0.0203  | 0.3564 |
| JW1797 | yoaA | putative ATP-dependent helicase, DinG family                     | 0.0043  | 0.8362 |
| JW1801 | pabB | aminodeoxychorismate synthase, subunit I                         | 0.0248  | 0.6040 |



|        |      |                                                                                               |         |        |
|--------|------|-----------------------------------------------------------------------------------------------|---------|--------|
| JW1802 | yeaB | putative CoA pyrophosphohydrolase, weak 3-phosphohydroxypyruvate phosphatase                  | -0.0042 | 0.8830 |
| JW1803 | sdaA | L-serine dehydratase 1                                                                        | 0.1051  | 0.2596 |
| JW1804 | yoaD | putative membrane-anchored cyclic-di-GMP phosphodiesterase, regulator of cellulose production | 0.0016  | 0.9229 |
| JW1805 | yoaE | putative membrane protein/conserved protein                                                   | -0.0434 | 0.4789 |
| JW1806 | manX | fused mannose-specific PTS enzymes: IIA component/IIB component                               | 0.0606  | 0.2943 |
| JW1807 | manY | mannose-specific enzyme IIC component of PTS                                                  | 0.1448  | 0.2011 |
| JW1808 | manZ | mannose-specific enzyme IID component of PTS                                                  | 0.0223  | 0.0705 |
| JW1809 | yobD | UPF0266 family inner membrane protein                                                         | -0.1019 | 0.0465 |
| JW1811 | rrmA | 23S rRNA m(1)G745 methyltransferase, SAM-dependent                                            | -0.0590 | 0.0130 |
| JW1812 | cspC | stress protein, member of the CspA-family                                                     | 0.0021  | 0.0005 |
| JW1813 | yobF | DUF2527 family heat-induced protein                                                           | -0.1873 | 0.0067 |
| JW1814 | yebO | putative inner membrane protein                                                               | -0.0553 | 0.2124 |
| JW1815 | yobG | regulatory peptide for PhoPQ, feedback inhibition                                             | -0.0366 | 0.2129 |
| JW1816 | kdgR | KDG regulon transcriptional repressor                                                         | -0.0169 | 0.4238 |
| JW1818 | htpX | putative endopeptidase                                                                        | 0.0540  | 0.6452 |
| JW1819 | prc  | carboxy-terminal protease for penicillin-binding protein 3                                    | 0.2088  | 0.0000 |
| JW1821 | yebR | free methionine-(R)-sulfoxide reductase                                                       | -0.1318 | 0.0208 |
| JW1822 | yebS | inner membrane subunit of the putative YebST transporter; PqiA domain protein                 | -0.0740 | 0.0529 |
| JW1823 | yebT | periplasmic MCE subunit of the putative YebST transporter, IM-anchored                        | -0.0879 | 0.0802 |
| JW1827 | pphA | serine/threonine-specific protein phosphatase 1                                               | -0.0262 | 0.4262 |
| JW1828 | yebY | DUF2511 family protein                                                                        | -0.0713 | 0.0916 |
| JW1829 | yebZ | inner membrane protein                                                                        | 0.0033  | 0.9177 |
| JW1830 | yobA | CopC family protein                                                                           | 0.0784  | 0.0632 |
| JW1831 | holE | DNA polymerase III, theta subunit                                                             | -0.1076 | 0.0040 |
| JW1832 | yobB | C-N hydrolase family protein                                                                  | -0.1899 | 0.0000 |
| JW1833 | exoX | exodeoxyribonuclease 10; DNA exonuclease X                                                    | 0.0512  | 0.0837 |
| JW1834 | ptrB | protease II                                                                                   | 0.0699  | 0.3100 |
| JW1835 | yebE | DUF533 family inner membrane protein                                                          | -0.0058 | 0.8846 |
| JW1836 | yebF | extracellular Colicin M immunity family protein                                               | -0.0049 | 0.8973 |

|        |      |                                                                                                              |         |        |
|--------|------|--------------------------------------------------------------------------------------------------------------|---------|--------|
| JW1837 | yebG | DNA damage-inducible protein regulated by LexA                                                               | 0.0934  | 0.0015 |
| JW1838 | purT | phosphoribosylglycinamide formyltransferase 2                                                                | 0.1154  | 0.0699 |
| JW1839 | eda  | KHG/KDPG aldolase; 2-dehydro-3-deoxy-phosphogluconate/4-hydroxy-2-oxoglutarate aldolase                      | 0.0090  | 0.5972 |
| JW1840 | edd  | 6-phosphogluconate dehydratase                                                                               | 0.0158  | 0.5403 |
| JW1841 | zwf  | glucose-6-phosphate 1-dehydrogenase                                                                          | -0.0263 | 0.3605 |
| JW1842 | yebK | putative DNA-binding transcriptional regulator                                                               | 0.0545  | 0.1308 |
| JW1843 | pykA | pyruvate kinase II                                                                                           | -0.0369 | 0.5901 |
| JW1844 | lpxM | myristoyl-acyl carrier protein (ACP)-dependent acyltransferase                                               | 0.1008  | 0.0353 |
| JW1847 | znuC | zinc ABC transporter ATPase                                                                                  | 0.1179  | 0.0057 |
| JW1848 | znuB | zinc ABC transporter permease                                                                                | 0.0297  | 0.3130 |
| JW1849 | ruvB | ATP-dependent DNA helicase, component of RuvABC resolvosome                                                  | -0.0369 | 0.3975 |
| JW1850 | ruvA | component of RuvABC resolvosome, regulatory subunit                                                          | -0.4221 | 0.0033 |
| JW1852 | ruvC | component of RuvABC resolvosome, endonuclease                                                                | 0.1639  | 0.4090 |
| JW1853 | yebC | UPF0082 family protein                                                                                       | 0.0101  | 0.7913 |
| JW1854 | nudB | dihydroneopterin triphosphate pyrophosphatase                                                                | 0.2439  | 0.0003 |
| JW1857 | yecE | UPF0759 family protein                                                                                       | -0.1413 | 0.0432 |
| JW1859 | yecO | carboxy-SAM synthase                                                                                         | -0.0461 | 0.0003 |
| JW1861 | torZ | trimethylamine N-oxide reductase system III, catalytic subunit                                               | -0.0390 | 0.3081 |
| JW1862 | torY | TMAO reductase III (TorYZ), cytochrome c-type subunit                                                        | 0.0175  | 0.1808 |
| JW1863 | cutC | putative copper homeostasis protein                                                                          | -0.0159 | 0.7243 |
| JW1867 | flhE | proton seal during flagellar secretion                                                                       | -0.1316 | 0.1554 |
| JW1868 | flhA | putative flagellar export pore protein                                                                       | -0.0010 | 0.9760 |
| JW1869 | flhB | flagellin export apparatus, substrate specificity protein                                                    | -0.1043 | 0.0005 |
| JW1870 | cheZ | chemotaxis regulator, protein phosphatase for CheY                                                           | 0.0388  | 0.4204 |
| JW1871 | cheY | chemotaxis regulator transmitting signal to flagellar motor component                                        | 0.0077  | 0.8022 |
| JW1872 | cheB | fused chemotaxis regulator: protein-glutamate methyltransferase in two-component regulatory system with CheA | 0.0319  | 0.6198 |
| JW1873 | cheR | chemotaxis regulator, protein-glutamate methyltransferase                                                    | -0.0538 | 0.1744 |
| JW1874 | tap  | methyl-accepting protein IV                                                                                  | 0.0706  | 0.0035 |
| JW1875 | tar  | methyl-accepting chemotaxis protein II                                                                       | 0.0487  | 0.0885 |
| JW1876 | cheW | purine-binding chemotaxis protein                                                                            | -0.0091 | 0.7803 |

|        |      |                                                                                                                                                   |         |        |
|--------|------|---------------------------------------------------------------------------------------------------------------------------------------------------|---------|--------|
| JW1877 | cheA | fused chemotactic sensory histidine kinase in two-component regulatory system with CheB and CheY; sensory histidine kinase/signal sensing protein | -0.0298 | 0.3450 |
| JW1878 | motB | protein that enables flagellar motor rotation                                                                                                     | 0.1043  | 0.1034 |
| JW1879 | motA | proton conductor component of flagella motor                                                                                                      | 0.0131  | 0.7670 |
| JW1880 | flhC | flagellar class II regulon transcriptional activator, with FlhD                                                                                   | 0.0198  | 0.2197 |
| JW1881 | flhD | flagellar class II regulon transcriptional activator, with FlhC                                                                                   | -0.0215 | 0.6406 |
| JW1884 | yecG | universal stress protein                                                                                                                          | -0.2251 | 0.1293 |
| JW1886 | otsB | trehalose-6-phosphate phosphatase, biosynthetic                                                                                                   | 0.1320  | 0.0015 |
| JW1887 | araH | L-arabinose ABC transporter permease                                                                                                              | 0.0448  | 0.0348 |
| JW1888 | araG | L-arabinose ABC transporter ATPase                                                                                                                | 0.0604  | 0.1717 |
| JW1889 | araF | L-arabinose ABC transporter periplasmic binding protein                                                                                           | 0.0956  | 0.0767 |
| JW1890 | yecI | ferritin B, putative ferrous iron reservoir                                                                                                       | 0.0122  | 0.6589 |
| JW1891 | yecJ | DUF2766 family protein                                                                                                                            | 0.0161  | 0.6214 |
| JW1892 | yecR | lipoprotein, function unknown                                                                                                                     | -0.0106 | 0.7756 |
| JW1893 | ftn  | ferritin iron storage protein (cytoplasmic)                                                                                                       | -0.2436 | 0.0369 |
| JW1894 | yecH | DUF2492 family protein                                                                                                                            | -0.0566 | 0.0608 |
| JW1895 | tyrP | tyrosine transporter                                                                                                                              | -0.3166 | 0.0143 |
| JW1896 | yecA | UPF0149 family protein                                                                                                                            | -0.1662 | 0.0000 |
| JW1898 | uvrC | excinuclease UvrABC, endonuclease subunit                                                                                                         | -0.0138 | 0.5854 |
| JW1899 | uvrY | response regulator in two-component regulatory system with BarA                                                                                   | 0.0286  | 0.4486 |
| JW1900 | yecF | DUF2594 family protein                                                                                                                            | -0.0133 | 0.4960 |
| JW1901 | sdiA | quorum-sensing transcriptional activator                                                                                                          | 0.0563  | 0.0019 |
| JW1902 | yecC | putative ABC transporter ATPase                                                                                                                   | -0.0052 | 0.8815 |
| JW1903 | yecS | ABC family putative inner membrane permease                                                                                                       | 0.0183  | 0.4430 |
| JW1905 | fliY | cystine transporter subunit                                                                                                                       | 0.0546  | 0.5977 |
| JW1906 | fliZ | RpoS antagonist; putative regulator of FliA activity                                                                                              | 0.0849  | 0.3257 |
| JW1907 | fliA | RNA polymerase, sigma 28 (sigma F) factor                                                                                                         | -0.0937 | 0.0002 |
| JW1908 | fliC | flagellar filament structural protein (flagellin)                                                                                                 | 0.1141  | 0.0003 |
| JW1909 | fliD | flagellar filament capping protein                                                                                                                | 0.0041  | 0.8987 |
| JW1910 | fliS | flagellar protein potentiates polymerization                                                                                                      | 0.0238  | 0.6531 |
| JW1911 | fliT | putative flagellar synthesis and assembly chaperone                                                                                               | 0.0720  | 0.1578 |
| JW1913 | yedD | lipoprotein                                                                                                                                       | -0.0013 | 0.9469 |

|        |      |                                                                           |         |        |
|--------|------|---------------------------------------------------------------------------|---------|--------|
| JW1914 | yedE | UPF0394 family sulphur transport domain-containing inner membrane protein | 0.0997  | 0.0132 |
| JW1915 | yedF | putative TusA family sulfurtransferase                                    | 0.0661  | 0.0082 |
| JW1916 | yedK | DUF159 family protein                                                     | 0.0009  | 0.9677 |
| JW1917 | yedL | GNAT family putative N-acetyltransferase                                  | -0.0094 | 0.6087 |
| JW1918 | yedN | Uncharacterized protein                                                   | 0.0231  | 0.1591 |
| JW1920 | yedM | Uncharacterized protein                                                   | 0.0985  | 0.0192 |
| JW1921 | fliE | flagellar basal-body component                                            | -0.1111 | 0.0337 |
| JW1922 | fliF | flagellar basal-body MS-ring and collar protein                           | 0.0310  | 0.2654 |
| JW1923 | fliG | flagellar motor switching and energizing component                        | -0.0345 | 0.0551 |
| JW1924 | fliH | negative regulator of FliI ATPase activity                                | -0.0691 | 0.1148 |
| JW1925 | fliI | flagellum-specific ATP synthase                                           | 0.0464  | 0.0487 |
| JW1926 | fliJ | flagellar protein                                                         | 0.0337  | 0.2982 |
| JW1927 | fliK | flagellar hook-length control protein                                     | 0.0140  | 0.6588 |
| JW1928 | fliL | flagellar biosynthesis protein                                            | 0.2246  | 0.0128 |
| JW1929 | fliM | flagellar motor switching and energizing component                        | 0.0007  | 0.9724 |
| JW1930 | fliN | flagellar motor switching and energizing component                        | 0.0425  | 0.2312 |
| JW1932 | fliP | flagellar biosynthesis protein                                            | 0.1292  | 0.0706 |
| JW1933 | fliQ | flagellar biosynthesis protein                                            | -0.0359 | 0.4625 |
| JW1934 | fliR | flagellar export pore protein                                             | 0.2425  | 0.0010 |
| JW1935 | rcaA | transcriptional regulator of colanic acid capsular biosynthesis           | 0.0339  | 0.2451 |
| JW1936 | dsrB | uncharacterized protein                                                   | 0.0256  | 0.2260 |
| JW1938 | yedP | putative mannosyl-3-phosphoglycerate phosphatase                          | 0.0642  | 0.0374 |
| JW1940 | yodC | uncharacterized protein                                                   | -0.0235 | 0.1428 |
| JW1941 | yedI | DUF808 family inner membrane protein                                      | 0.0524  | 0.1647 |
| JW1942 | yedA | amino acid exporter for phenylalanine, threonine                          | 0.0514  | 0.0744 |
| JW1943 | vsr  | DNA mismatch endonuclease of very short patch repair                      | 0.1470  | 0.0222 |
| JW1944 | dcm  | DNA cytosine methyltransferase                                            | 0.0958  | 0.0066 |
| JW1945 | yedJ | putative HD superfamily phosphohydrolase                                  | 0.0237  | 0.5361 |
| JW1946 | yedR | inner membrane protein                                                    | 0.0642  | 0.0869 |
| JW1948 | yedS | Putative outer membrane protein                                           | -0.0827 | 0.0610 |
| JW1950 | hchA | glyoxalase III and Hsp31 molecular chaperone                              | 0.0462  | 0.0815 |
| JW1951 | yedV | putative sensory kinase in two-component regulatory system with YedW      | 0.0340  | 0.1490 |
| JW1953 | yedX | hydroxyisourate hydrolase                                                 | -0.1246 | 0.0140 |
| JW1954 | yedY | membrane-anchored, periplasmic TMAO, DMSO reductase                       | 0.0102  | 0.7891 |
| JW1955 | yedZ | inner membrane heme subunit for periplasmic YedYZ reductase               | 0.0223  | 0.4021 |

|        |      |                                                                                     |         |        |
|--------|------|-------------------------------------------------------------------------------------|---------|--------|
| JW1956 | yodA | zinc and cadmium binding protein, periplasmic                                       | -0.1038 | 0.0399 |
| JW1958 | yeeI | anti-repressor for DgsA(Mlc)                                                        | 0.0557  | 0.2234 |
| JW1961 | yeeL | Uncharacterized protein                                                             | 0.0939  | 0.0033 |
| JW1962 | shiA | shikimate transporter                                                               | -0.0197 | 0.6715 |
| JW1963 | amn  | AMP nucleosidase                                                                    | -0.0945 | 0.0892 |
| JW1964 | yeeN | UPF0082 family protein                                                              | 0.0110  | 0.5675 |
| JW1965 | yeeO | putative multidrug exporter, MATE family                                            | 0.0951  | 0.0028 |
| JW1966 | cbl  | ssuEADCB/tauABCD operon transcriptional activator                                   | 0.0390  | 0.2634 |
| JW1967 | nac  | nitrogen assimilation regulon transcriptional regulator; autorepressor              | 0.0519  | 0.0471 |
| JW1968 | erfK | L,D-transpeptidase linking Lpp to murein                                            | 0.1160  | 0.0217 |
| JW1969 | cobT | nicotinate-nucleotide--dimethylbenzimidazole phosphoribosyltransferase              | 0.0103  | 0.8018 |
| JW1970 | cobS | cobalamin synthase                                                                  | -0.0868 | 0.2186 |
| JW1971 | cobU | cobinamide kinase and cobinamide phosphate guanylyltransferase                      | 0.0181  | 0.5451 |
| JW1982 | flu  | CP4-44 prophage; antigen 43 (Ag43) phase-variable biofilm formation autotransporter | 0.0393  | 0.1321 |
| JW1983 | yeeR | CP4-44 prophage; putative membrane protein                                          | -0.0131 | 0.5730 |
| JW1984 | yeeS | CP4-44 prophage; putative DNA repair protein                                        | 0.0415  | 0.0552 |
| JW1985 | yeeT | CP4-44 prophage; uncharacterized protein                                            | 0.0120  | 0.5373 |
| JW1986 | yeeU | CP4-44 prophage; cytoskeleton bundling-enhancing factor A; CbtA antitoxin           | -0.0788 | 0.1142 |
| JW1987 | yeeV | CP4-44 prophage; toxin of the YeeV-YeeU toxin-antitoxin system                      | 0.0215  | 0.4393 |
| JW1988 | yeeW | CP4-44 prophage; uncharacterized protein                                            | 0.0313  | 0.0788 |
| JW1989 | yeeX | UPF0265 family protein                                                              | 0.0934  | 0.0002 |
| JW1990 | yeeA | putative transporter, FUSC family inner membrane protein                            | 0.0240  | 0.1963 |
| JW1991 | sbmC | DNA gyrase inhibitor                                                                | 0.0976  | 0.0290 |
| JW1993 | sbcB | exodeoxyribonuclease I; exonuclease I                                               | 0.0417  | 0.2372 |
| JW1994 | yeeD | putative TusA family sulfurtransferase                                              | 0.0471  | 0.2170 |
| JW1995 | yeeE | UPF0394 family inner membrane protein                                               | 0.0038  | 0.8903 |
| JW1998 | yeeZ | putative epimerase                                                                  | 0.3711  | 0.0086 |
| JW2000 | hisL | his operon leader peptide                                                           | -0.0058 | 0.7897 |
| JW2001 | hisG | ATP phosphoribosyltransferase                                                       | 0.0949  | 0.1704 |
| JW2002 | hisD | bifunctional histidinal dehydrogenase/histidinol dehydrogenase                      | 0.0041  | 0.9690 |
| JW2003 | hisC | histidinol-phosphate aminotransferase                                               | 0.0006  | 0.9949 |

|        |      |                                                                                                                           |         |        |
|--------|------|---------------------------------------------------------------------------------------------------------------------------|---------|--------|
| JW2004 | hisB | histidinol-phosphatase and imidazoleglycerol-phosphate dehydratase                                                        | 0.1094  | 0.0001 |
| JW2005 | hisH | imidazole glycerol phosphate synthase, glutamine amidotransferase subunit                                                 | -0.0285 | 0.6782 |
| JW2006 | hisA | N-(5'-phospho-L-riboseyl-formimino)-5-amino-1-(5'-phosphoribosyl)-4-imidazolecarboxamide isomerase                        | -0.1623 | 0.0051 |
| JW2007 | hisF | imidazole glycerol phosphate synthase, catalytic subunit with HisH                                                        | 0.0068  | 0.9702 |
| JW2008 | hisI | phosphoribosyl-AMP cyclohydrolase and phosphoribosyl-ATP pyrophosphatase                                                  | 0.0287  | 0.6003 |
| JW2010 | ugd  | UDP-glucose 6-dehydrogenase                                                                                               | -0.0941 | 0.3858 |
| JW2011 | gnd  | 6-phosphogluconate dehydrogenase, decarboxylating                                                                         | -0.0161 | 0.6454 |
| JW2012 | wbbL | Glucose-1-phosphate thymidyltransferase 1                                                                                 | -0.0762 | 0.0000 |
| JW2017 | wbbK | lipopolysaccharide biosynthesis protein                                                                                   | -0.0494 | 0.1440 |
| JW2018 | wbbJ | putative lipopolysaccharide biosynthesis O-acetyl transferase                                                             | -0.0328 | 0.2755 |
| JW2019 | wbbI | d-Galf:alpha-d-Glc beta-1,6-galactofuranosyltransferase                                                                   | -0.1341 | 0.0008 |
| JW2020 | wbbH | O-antigen polymerase                                                                                                      | 0.0331  | 0.2894 |
| JW2021 | glf  | UDP-galactopyranose mutase, FAD/NAD(P)-binding                                                                            | -0.0934 | 0.0219 |
| JW2022 | rfbX | putative polisoprenol-linked O-antigen transporter                                                                        | 0.0187  | 0.7470 |
| JW2023 | rfbC | dTDP-4-deoxyrhamnose-3,5-epimerase                                                                                        | 0.0728  | 0.0019 |
| JW2024 | rfaA | glucose-1-phosphate thymidyltransferase                                                                                   | 0.1324  | 0.0320 |
| JW2025 | rfaD | dTDP-L-rhamnose synthase, NAD(P)-dependent dTDP-4-dehydrorhamnose reductase subunit                                       | 0.0862  | 0.1575 |
| JW2026 | rfaB | dTDP-glucose 4,6 dehydratase, NAD(P)-binding                                                                              | -0.0116 | 0.5243 |
| JW2027 | galF | putative regulatory subunit for GalU                                                                                      | -0.0053 | 0.8200 |
| JW2028 | wcaM | colanic acid biosynthesis protein                                                                                         | 0.0493  | 0.0946 |
| JW2029 | wcaL | putative glycosyl transferase                                                                                             | 0.1035  | 0.0303 |
| JW2030 | wcaK | colanic acid biosynthesis protein                                                                                         | -0.1010 | 0.0405 |
| JW2031 | wzcC | putative colanic acid exporter                                                                                            | -0.0223 | 0.7493 |
| JW2032 | wcaJ | colanic biosynthesis UDP-glucose lipid carrier transferase                                                                | 0.0414  | 0.0992 |
| JW2033 | cpsG | phosphomannomutase                                                                                                        | 0.0949  | 0.2545 |
| JW2034 | cpsB | mannose-1-phosphate guanyltransferase                                                                                     | -0.0170 | 0.0708 |
| JW2035 | wcaI | putative glycosyl transferase                                                                                             | 0.2625  | 0.0051 |
| JW2037 | fcl  | bifunctional GDP-fucose synthetase: GDP-4-dehydro-6-deoxy-D-mannose epimerase/ GDP-4-dehydro-6-L-deoxygalactose reductase | 0.0200  | 0.7836 |

|        |      |                                                                                                                                   |         |        |
|--------|------|-----------------------------------------------------------------------------------------------------------------------------------|---------|--------|
| JW2038 | gmd  | GDP-D-mannose dehydratase, NAD(P)-binding                                                                                         | 0.0708  | 0.1010 |
| JW2039 | wcaF | putative acyl transferase                                                                                                         | 0.1500  | 0.1180 |
| JW2040 | wcaE | putative glycosyl transferase                                                                                                     | 0.0166  | 0.2044 |
| JW2041 | wcaD | putative colanic acid polymerase                                                                                                  | -0.0079 | 0.6024 |
| JW2042 | wcaC | putative glycosyl transferase                                                                                                     | 0.1345  | 0.0397 |
| JW2043 | wcaB | putative acyl transferase                                                                                                         | -0.0353 | 0.6164 |
| JW2044 | wcaA | putative glycosyl transferase                                                                                                     | -0.0196 | 0.3812 |
| JW2045 | wzc  | colanic acid production tyrosine-protein kinase; autokinase; Ugd phosphorylase                                                    | -0.0009 | 0.9255 |
| JW2046 | wzb  | colanic acid production protein-tyrosine-phosphatase; Wzc-P dephosphorylase                                                       | -0.0094 | 0.7994 |
| JW2047 | wza  | colanic acid export protein; outer membrane auxillary lipoprotein                                                                 | -0.0093 | 0.7078 |
| JW2049 | asmA | suppressor of OmpF assembly mutants; putative outer membrane protein assembly factor; inner membrane-anchored periplasmic protein | 0.1249  | 0.0001 |
| JW2050 | dcd  | deoxycytidine triphosphate deaminase; dCTP deaminase                                                                              | 0.2240  | 0.0078 |
| JW2051 | udk  | uridine-cytidine kinase                                                                                                           | -0.1351 | 0.0175 |
| JW2052 | yegE | putative diguanylate cyclase                                                                                                      | 0.0209  | 0.4004 |
| JW2053 | alkA | 3-methyl-adenine DNA glycosylase II                                                                                               | -0.0433 | 0.1131 |
| JW2054 | yegD | Hsp70 chaperone family protein                                                                                                    | -0.0569 | 0.0117 |
| JW2055 | yegI | protein kinase-related putative non-specific DNA-binding protein                                                                  | -0.0302 | 0.4945 |
| JW2056 | yegJ | DUF2314 family protein                                                                                                            | 0.0407  | 0.1377 |
| JW2057 | yegK | ser/thr phosphatase-related protein                                                                                               | -0.0941 | 0.0011 |
| JW2058 | yegL | VMA domain protein                                                                                                                | -0.1320 | 0.1403 |
| JW2060 | mdtB | multidrug efflux system, subunit B                                                                                                | -0.0248 | 0.4109 |
| JW2061 | mdtC | multidrug efflux system, subunit C                                                                                                | -0.0020 | 0.9053 |
| JW2062 | mdtD | putative citrate/iron-citrate/zinc-citrate efflux transporter                                                                     | -0.0087 | 0.7900 |
| JW2063 | baeS | sensory histidine kinase in two-component regulatory system with BaeR                                                             | -0.0378 | 0.1347 |
| JW2064 | baeR | response regulator in two-component regulatory system with BaeS                                                                   | 0.0710  | 0.0304 |
| JW2066 | yegQ | putative peptidase                                                                                                                | 0.0822  | 0.0797 |
| JW2067 | ogrK | orphan Ogr protein, positive regulator of P2 growth                                                                               | 0.1923  | 0.0000 |
| JW2070 | yegS | phosphatidylglycerol kinase, metal-dependent                                                                                      | 0.0128  | 0.4352 |
| JW2074 | gatR | Putative galactitol utilization operon repressor                                                                                  | -0.0111 | 0.6993 |
| JW2075 | gatD | galactitol-1-phosphate dehydrogenase, Zn-dependent and NAD(P)-binding                                                             | 0.0538  | 0.0065 |

|        |      |                                                                            |         |        |
|--------|------|----------------------------------------------------------------------------|---------|--------|
| JW2076 | gatC | pseudogene, galactitol-specific enzyme IIC component of PTS                | -0.0013 | 0.9673 |
| JW2077 | gatB | galactitol-specific enzyme IIB component of PTS                            | 0.0422  | 0.3326 |
| JW2082 | gatZ | D-tagatose 1,6-bisphosphate aldolase 2, subunit                            | -0.1107 | 0.0002 |
| JW2085 | yegT | nucleoside transporter, low affinity                                       | -0.0529 | 0.1214 |
| JW2086 | yegU | ADP-ribosylglycohydrolase family protein                                   | 0.0848  | 0.0598 |
| JW2087 | yegV | putative kinase                                                            | 0.0139  | 0.6674 |
| JW2088 | yegW | putative DNA-binding transcriptional regulator                             | -0.0080 | 0.7082 |
| JW2090 | thiD | hydroxy-methylpyrimidine kinase and hydroxy-phosphomethylpyrimidine kinase | 0.0312  | 0.2577 |
| JW2092 | yohL | transcriptional repressor of rcnA                                          | -0.0073 | 0.8354 |
| JW2093 | yohM | membrane protein conferring nickel and cobalt resistance                   | 0.0054  | 0.7462 |
| JW2095 | yehA | putative fimbrial-like adhesin protein                                     | -0.0144 | 0.3939 |
| JW2096 | yehB | putative outer membrane protein                                            | 0.0594  | 0.1257 |
| JW2097 | yehC | putative periplasmic pilin chaperone                                       | -0.0109 | 0.6143 |
| JW2098 | yehD | putative fimbrial-like adhesin protein                                     | -0.0261 | 0.3097 |
| JW2099 | yehE | DUF2574 family protein                                                     | -0.1350 | 0.1220 |
| JW2100 | mrp  | antiporter inner membrane protein                                          | 0.1867  | 0.0345 |
| JW2102 | molR | Putative molybdate metabolism regulator                                    | 0.0248  | 0.4520 |
| JW2106 | yehK | uncharacterized protein                                                    | 0.0781  | 0.0046 |
| JW2108 | yehM | uncharacterized protein                                                    | 0.0187  | 0.1146 |
| JW2110 | yehQ | pseudogene                                                                 | -0.0537 | 0.0011 |
| JW2112 | yehS | DUF1456 family protein                                                     | 0.0158  | 0.5156 |
| JW2115 | mlrA | transcriptional activator of csgD and csgBA                                | -0.0270 | 0.5131 |
| JW2116 | yehW | putative ABC transporter permease                                          | 0.0199  | 0.5796 |
| JW2117 | yehX | putative ABC transporter ATPase                                            | 0.0236  | 0.5198 |
| JW2118 | yehY | putative ABC transporter permease                                          | 0.0762  | 0.0405 |
| JW2119 | yehZ | putative ABC transporter periplasmic binding protein                       | -0.0121 | 0.3581 |
| JW2120 | bglX | beta-D-glucoside glucohydrolase, periplasmic                               | -0.0991 | 0.0044 |
| JW2121 | dld  | D-lactate dehydrogenase, FAD-binding, NADH independent                     | 0.0157  | 0.5490 |
| JW2124 | yohD | DedA family inner membrane protein                                         | -0.0610 | 0.0317 |
| JW2125 | yohF | putative oxidoreductase                                                    | -0.0060 | 0.7620 |
| JW2128 | dusC | tRNA-dihydrouridine synthase C                                             | -0.0464 | 0.0675 |
| JW2129 | yohJ | UPF0299 family inner membrane protein                                      | 0.0454  | 0.0021 |
| JW2130 | yohK | LrgB family inner membrane protein                                         | 0.0226  | 0.1986 |
| JW2131 | cdd  | cytidine/deoxycytidine deaminase                                           | 0.0469  | 0.3173 |
| JW2132 | sanA | DUF218 superfamily vancomycin high temperature exclusion protein           | -0.3201 | 0.0043 |
| JW2133 | yehT | dihydropyrimidine dehydrogenase, NADH-dependent, subunit N                 | -0.0713 | 0.0491 |
| JW2134 | yehA | dihydropyrimidine dehydrogenase, NADH-dependent, subunit C                 | 0.0918  | 0.0112 |
| JW2135 | mgIC | methyl-galactoside transporter subunit                                     | 0.0521  | 0.2836 |



|        |      |                                                                                                                                                             |         |        |
|--------|------|-------------------------------------------------------------------------------------------------------------------------------------------------------------|---------|--------|
| JW2136 | mglA | methyl-galactoside ABC transporter ATPase                                                                                                                   | -0.1458 | 0.2555 |
| JW2137 | mglB | methyl-galactoside transporter subunit                                                                                                                      | -0.0443 | 0.3257 |
| JW2138 | galS | galactose- and fucose-inducible galactose regulon transcriptional isorepressor; mgl operon transcriptional repressor; autorepressor                         | -0.0092 | 0.7909 |
| JW2139 | yeiB | DUF418 family putative inner membrane protein                                                                                                               | -0.0327 | 0.1471 |
| JW2141 | yeiG | S-formylglutathione hydrolase                                                                                                                               | -0.0680 | 0.1510 |
| JW2142 | cirA | colicin IA outer membrane receptor and translocator; ferric iron-catecholate transporter                                                                    | -0.0309 | 0.3062 |
| JW2143 | lysP | lysine transporter                                                                                                                                          | 0.0397  | 0.1467 |
| JW2144 | yeiE | putative DNA-binding transcriptional regulator                                                                                                              | -0.0128 | 0.6039 |
| JW2145 | yeiH | UPF0324 family inner membrane protein                                                                                                                       | 0.0635  | 0.2533 |
| JW2146 | nfo  | endonuclease IV with intrinsic 3'-5' exonuclease activity                                                                                                   | 0.0575  | 0.0435 |
| JW2147 | yeiI | putative kinase                                                                                                                                             | 0.0483  | 0.1212 |
| JW2148 | yeiJ | nucleoside permease                                                                                                                                         | 0.0083  | 0.7322 |
| JW2149 | rihB | ribonucleoside hydrolase 2                                                                                                                                  | 0.0298  | 0.1568 |
| JW2150 | yeiL | nitrogen starvation viability factor; putative ColA sensitivity effector; putative Crp-Fnr family transcriptional regulator                                 | -0.0805 | 0.0139 |
| JW2151 | yeiM | putative nucleoside transporter                                                                                                                             | -0.0077 | 0.6628 |
| JW2152 | yeiN | pseudouridine 5'-phosphate glycosidase                                                                                                                      | 0.0217  | 0.6015 |
| JW2153 | yeiC | pseudouridine kinase                                                                                                                                        | -0.0516 | 0.0585 |
| JW2154 | fruA | fused fructose-specific PTS enzymes: IIBcomponent/IIC components                                                                                            | -0.0880 | 0.0236 |
| JW2155 | fruK | fructose-1-phosphate kinase                                                                                                                                 | 0.0778  | 0.0000 |
| JW2156 | fruB | fused fructose-specific PTS enzymes: IIA component/HPr component                                                                                            | 0.0990  | 0.1261 |
| JW2157 | setB | lactose/glucose efflux system                                                                                                                               | 0.0363  | 0.2333 |
| JW2160 | yeiQ | putative NAD-dependent D-mannonate oxidoreductase                                                                                                           | 0.0887  | 0.0215 |
| JW2161 | yeiR | Zn-stimulated GTPase involved in zinc homeostasis; mutants are cadmium and EDTA sensitive; Zn(2+) binding protein                                           | -0.0110 | 0.6861 |
| JW2162 | yeiU | lipid A 1-diphosphate synthase; undecaprenyl pyrophosphate:lipid A 1-phosphate phosphotransferase                                                           | 0.0252  | 0.3074 |
| JW2163 | spr  | murein DD-endopeptidase, space-maker hydrolase, mutational suppressor of prc thermosensitivity, outer membrane lipoprotein, weak murein LD-carboxypeptidase | 0.0057  | 0.8830 |

|        |      |                                                                                                         |         |        |
|--------|------|---------------------------------------------------------------------------------------------------------|---------|--------|
| JW2164 | rtn  | resistance protein for phages lambda and N4, putative membrane-anchored cyclic-di-GMP phosphodiesterase | 0.0908  | 0.0571 |
| JW2165 | yejA | microcin C ABC transporter periplasmic binding protein                                                  | 0.0647  | 0.0006 |
| JW2166 | yejB | microcin C ABC transporter permease                                                                     | -0.0162 | 0.3893 |
| JW2167 | yejE | microcin C ABC transporter permease                                                                     | -0.0043 | 0.8520 |
| JW2168 | yejF | microcin C ABC transporter ATPase                                                                       | 0.2254  | 0.0176 |
| JW2169 | yejG | uncharacterized protein                                                                                 | -0.1795 | 0.1114 |
| JW2171 | rsuA | 16S rRNA pseudouridine(516) synthase                                                                    | -0.0010 | 0.9721 |
| JW2172 | yejH | putative ATP-dependent DNA or RNA helicase                                                              | 0.0257  | 0.4763 |
| JW2173 | rpLY | 50S ribosomal subunit protein L25                                                                       | 0.0178  | 0.7212 |
| JW2175 | yejL | UPF0352 family protein                                                                                  | -0.0170 | 0.2502 |
| JW2181 | narP | response regulator in two-component regulatory system with NarQ                                         | 0.0062  | 0.7828 |
| JW2182 | ccmH | heme lyase, CcmH subunit                                                                                | 0.0220  | 0.5112 |
| JW2183 | ccmG | periplasmic thioredoxin of cytochrome c-type biogenesis                                                 | 0.1365  | 0.0125 |
| JW2184 | ccmF | heme lyase, CcmF subunit                                                                                | -0.0115 | 0.8212 |
| JW2185 | ccmE | periplasmic heme chaperone                                                                              | 0.0510  | 0.0304 |
| JW2188 | ccmB | heme export ABC transporter permease                                                                    | -0.0274 | 0.2703 |
| JW2190 | napC | quinol dehydrogenase, electron source for NapAB                                                         | 0.1287  | 0.1728 |
| JW2192 | napH | ferredoxin-type protein                                                                                 | 0.0623  | 0.1763 |
| JW2193 | napG | ferredoxin-type protein                                                                                 | -0.0554 | 0.2671 |
| JW2194 | napA | nitrate reductase, periplasmic, large subunit                                                           | 0.0113  | 0.6679 |
| JW2195 | napD | assembly protein for periplasmic nitrate reductase                                                      | 0.0473  | 0.0371 |
| JW2196 | napF | ferredoxin-type protein, role in electron transfer to periplasmic nitrate reductase NapA                | 0.0365  | 0.0076 |
| JW2197 | eco  | ecotin, a serine protease inhibitor                                                                     | -0.0146 | 0.4233 |
| JW2198 | mgo  | malate dehydrogenase, FAD/NAD(P)-binding domain                                                         | 0.0561  | 0.2982 |
| JW2199 | yoiI | microcin J25 efflux ABC transporter permease/ATPase                                                     | 0.1773  | 0.0134 |
| JW2200 | alkB | oxidative demethylase of N1-methyladenine or N3-methylcytosine DNA lesions                              | -0.0665 | 0.0083 |
| JW2201 | ada  | fused DNA-binding transcriptional dual regulator/O6-methylguanine-DNA methyltransferase                 | 0.0272  | 0.3023 |
| JW2203 | ompC | outer membrane porin protein C                                                                          | 0.1032  | 0.1080 |

|        |      |                                                                                                                           |         |        |
|--------|------|---------------------------------------------------------------------------------------------------------------------------|---------|--------|
| JW2204 | rcsD | phosphotransfer intermediate protein in two-component regulatory system with RcsBC                                        | -0.0767 | 0.0211 |
| JW2205 | rcsB | response regulator in two-component regulatory system with RcsC and YojN                                                  | 0.0575  | 0.0227 |
| JW2213 | atoS | sensory histidine kinase in two-component regulatory system with AtoC                                                     | 0.0371  | 0.2655 |
| JW2214 | atoC | fused response regulator of ato operon, in two-component system with AtoS: response regulator/sigma54 interaction protein | -0.1070 | 0.0623 |
| JW2215 | atoD | acetyl-CoA:acetoacetyl-CoA transferase, alpha subunit                                                                     | -0.1170 | 0.0163 |
| JW2216 | atoA | acetyl-CoA:acetoacetyl-CoA transferase, beta subunit                                                                      | -0.0445 | 0.0636 |
| JW2217 | atoE | short chain fatty acid transporter                                                                                        | 0.0116  | 0.4578 |
| JW2218 | atoB | acetyl-CoA acetyltransferase                                                                                              | -0.0541 | 0.0947 |
| JW2219 | yfaP | DUF2135 family protein, putative host defense protein                                                                     | -0.0077 | 0.0831 |
| JW2220 | yfaQ | tandem DUF2300 domain protein, putative host defense protein                                                              | -0.0093 | 0.7521 |
| JW2221 | yfaS | Putative UPF0192 protein                                                                                                  | -0.2235 | 0.0404 |
| JW2223 | yfaT | DUF1175 family protein, putative host defense protein                                                                     | 0.0401  | 0.3723 |
| JW2224 | yfaA | DUF2138 family protein, putative host defense protein                                                                     | 0.1604  | 0.0001 |
| JW2226 | ubiG | bifunctional 3-demethylubiquinone-9 3-methyltransferase/ 2-octaprenyl-6-hydroxy phenol methylase                          | 0.0919  | 0.1566 |
| JW2227 | yfaL | adhesin                                                                                                                   | 0.0573  | 0.0159 |
| JW2230 | yfaE | ferredoxin involved with ribonucleotide reductase diferric-tyrosyl radical (Y*) cofactor maintenance                      | 0.1047  | 0.0000 |
| JW2231 | inaA | acid-inducible Kdo/WaaP family putative kinase                                                                            | -0.1541 | 0.3019 |
| JW2232 | yfaH | pseudogene                                                                                                                | -0.2269 | 0.0001 |
| JW2233 | glpQ | periplasmic glycerophosphodiester phosphodiesterase                                                                       | 0.0388  | 0.5144 |
| JW2234 | glpT | sn-glycerol-3-phosphate transporter                                                                                       | 0.0805  | 0.3588 |
| JW2235 | glpA | anaerobic sn-glycerol-3-phosphate dehydrogenase, large FAD/NAD(P)-binding subunit                                         | -0.0398 | 0.1259 |
| JW2236 | glpB | anaerobic sn-glycerol-3-phosphate dehydrogenase membrane anchor subunit                                                   | 0.1511  | 0.0452 |
| JW2237 | glpC | anaerobic sn-glycerol-3-phosphate dehydrogenase, C subunit, 4Fe-4S iron-sulfur cluster                                    | -0.0069 | 0.6671 |
| JW2238 | yfaD | transposase_31 family protein                                                                                             | -0.3210 | 0.0423 |

|        |      |                                                                       |         |        |
|--------|------|-----------------------------------------------------------------------|---------|--------|
| JW2239 | yfaU | 2-keto-3-deoxy-L-rhamnonate aldolase                                  | 0.1692  | 0.0083 |
| JW2240 | yfaV | putative L-rhamnonate transporter                                     | -0.1334 | 0.4586 |
| JW2241 | yfaW | L-rhamnonate dehydratase                                              | -0.0496 | 0.0038 |
| JW2242 | yfaX | putative DNA-binding transcriptional regulator for the rhm operon     | -0.0470 | 0.0515 |
| JW2243 | yfaY | inactive PncC family protein                                          | -0.0301 | 0.1406 |
| JW2245 | yfaO | nucleoside triphosphatase                                             | -0.0410 | 0.0286 |
| JW2246 | ais  | putative LPS core heptose(II)-phosphate phosphatase                   | 0.0356  | 0.1149 |
| JW2248 | yfbF | undecaprenyl phosphate-L-Ara4FN transferase                           | 0.0701  | 0.1546 |
| JW2249 | yfbG | fused UDP-L-Ara4N formyltransferase/UDP-GlcA C-4'-decarboxylase       | -0.0413 | 0.1033 |
| JW2250 | yfbH | undecaprenyl phosphate-alpha-L-ara4FN deformylase                     | 0.0186  | 0.6638 |
| JW2251 | arnT | 4-amino-4-deoxy-L-arabinose transferase                               | -0.0475 | 0.0588 |
| JW2252 | yfbW | undecaprenyl phosphate-alpha-L-ara4N exporter; flippase ArnEF subunit | 0.0471  | 0.2988 |
| JW2254 | pmrD | inactive two-component system connector protein                       | -0.0784 | 0.2299 |
| JW2255 | menE | O-succinylbenzoate-CoA ligase                                         | 0.0403  | 0.2362 |
| JW2256 | menC | O-succinylbenzoyl-CoA synthase                                        | 0.1062  | 0.0117 |
| JW2257 | menB | dihydroxynaphthoic acid synthetase                                    | 0.0092  | 0.8365 |
| JW2258 | yfbB | 2-succinyl-6-hydroxy-2,4-cyclohexadiene-1-carboxylate synthase        | 0.0165  | 0.3781 |
| JW2260 | menF | isochorismate synthase 2                                              | 0.0538  | 0.3448 |
| JW2261 | elaB | putative membrane-anchored DUF883 family ribosome-binding protein     | -0.0788 | 0.0435 |
| JW2262 | elaA | GNAT family putative N-acetyltransferase                              | 0.0472  | 0.2291 |
| JW2263 | elaC | RNase BN, tRNA processing enzyme                                      | -0.0197 | 0.3380 |
| JW2265 | yfbK | Von Willebrand factor domain putative lipoprotein                     | 0.0036  | 0.9031 |
| JW2266 | yfbL | putative M28A family peptidase                                        | -0.0495 | 0.1049 |
| JW2267 | yfbM | DUF1877 family protein                                                | 0.0530  | 0.0153 |
| JW2268 | yfbN | uncharacterized protein                                               | 0.0709  | 0.4476 |
| JW2269 | yfbO | uncharacterized protein                                               | -0.0406 | 0.4643 |
| JW2270 | yfbP | TPR-like repeats-containing protein                                   | -0.0489 | 0.1756 |
| JW2271 | nuoN | NADH:ubiquinone oxidoreductase, membrane subunit N                    | -0.0269 | 0.2759 |
| JW2272 | nuoM | NADH:ubiquinone oxidoreductase, membrane subunit M                    | -0.0227 | 0.3711 |

|        |      |                                                                                                |         |        |
|--------|------|------------------------------------------------------------------------------------------------|---------|--------|
| JW2273 | nuoL | NADH:ubiquinone oxidoreductase, membrane subunit L                                             | 0.0356  | 0.2889 |
| JW2274 | nuoK | NADH:ubiquinone oxidoreductase, membrane subunit K                                             | -0.0101 | 0.8770 |
| JW2275 | nuoJ | NADH:ubiquinone oxidoreductase, membrane subunit J                                             | 0.0069  | 0.6830 |
| JW2276 | nuoI | NADH:ubiquinone oxidoreductase, chain I                                                        | -0.0716 | 0.3532 |
| JW2277 | nuoH | NADH:ubiquinone oxidoreductase, membrane subunit H                                             | -0.0298 | 0.2455 |
| JW2278 | nuoG | NADH:ubiquinone oxidoreductase, chain G                                                        | -0.0202 | 0.3722 |
| JW2279 | nuoF | NADH:ubiquinone oxidoreductase, chain F                                                        | 0.0310  | 0.1148 |
| JW2280 | nuoE | NADH:ubiquinone oxidoreductase, chain E                                                        | 0.0388  | 0.1586 |
| JW2283 | nuoA | NADH:ubiquinone oxidoreductase, membrane subunit A                                             | 0.1121  | 0.0002 |
| JW2284 | lrhA | transcriptional repressor of flagellar, motility and chemotaxis genes                          | 0.0466  | 0.2393 |
| JW2287 | yfbQ | glutamate-pyruvate aminotransferase; glutamic-pyruvic transaminase (GPT); alanine transaminase | 0.1208  | 0.0008 |
| JW2288 | yfbR | 5'-nucleotidase                                                                                | -0.0770 | 0.0361 |
| JW2289 | yfbS | putative transporter                                                                           | -0.0589 | 0.0570 |
| JW2291 | yfbU | UPF0304 family protein                                                                         | 0.1109  | 0.0068 |
| JW2292 | yfbV | UPF0208 family inner membrane protein                                                          | -0.0079 | 0.7904 |
| JW2293 | ackA | acetate kinase A and propionate kinase 2                                                       | -0.0357 | 0.2169 |
| JW2294 | pta  | phosphate acetyltransferase                                                                    | -0.0026 | 0.9467 |
| JW2295 | yfcC | putative inner membrane transporter; C4-dicarboxylate anaerobic carrier family protein         | -0.1218 | 0.0002 |
| JW2296 | yfcD | putative NUDIX hydrolase                                                                       | -0.1433 | 0.0092 |
| JW2298 | yfcF | glutathione S-transferase                                                                      | 0.0036  | 0.4696 |
| JW2299 | yfcG | GSH-dependent disulfide bond oxidoreductase                                                    | 0.0847  | 0.0076 |
| JW2300 | folX | D-erythro-7,8-dihydroneopterin triphosphate 2'-epimerase and dihydroneopterin aldolase         | 0.0597  | 0.0783 |
| JW2301 | yfcH | putative NAD-dependent nucleotide-sugar epimerase                                              | -0.0944 | 0.0731 |
| JW2302 | yfcI | transposase_31 family protein                                                                  | -0.0194 | 0.5976 |
| JW2303 | hisP | histidine ABC transporter ATPase                                                               | -0.0664 | 0.0102 |
| JW2304 | hisM | histidine ABC transporter permease                                                             | -0.0262 | 0.1500 |
| JW2305 | hisQ | histidine ABC transporter permease                                                             | 0.0298  | 0.1478 |
| JW2306 | hisJ | histidine ABC transporter periplasmic binding protein                                          | 0.0273  | 0.3429 |
| JW2307 | argT | lysine/arginine/ornithine transporter subunit                                                  | -0.0783 | 0.4077 |
| JW2308 | ubiX | 3-octaprenyl-4-hydroxybenzoate carboxylase                                                     | 0.0075  | 0.9729 |

|        |      |                                                                                 |         |        |
|--------|------|---------------------------------------------------------------------------------|---------|--------|
| JW2309 | purF | amidophosphoribosyltransferase                                                  | 0.1567  | 0.0401 |
| JW2310 | cvpA | colicin V production protein                                                    | -0.0913 | 0.1617 |
| JW2314 | dedA | DedA family inner membrane protein                                              | 0.0535  | 0.0124 |
| JW2315 | truA | tRNA pseudouridine(38-40) synthase                                              | 0.0545  | 0.2214 |
| JW2316 | usg  | putative semialdehyde dehydrogenase                                             | 0.0221  | 0.2880 |
| JW2317 | pdxB | erythronate-4-phosphate dehydrogenase                                           | 0.0618  | 0.1044 |
| JW2318 | flk  | putative flagella assembly protein                                              | 0.0132  | 0.4068 |
| JW2319 | yfcJ | putative arabinose efflux transporter                                           | -0.0570 | 0.0014 |
| JW2322 | yfcL | uncharacterized protein                                                         | 0.2553  | 0.0353 |
| JW2324 | yfcA | TauE/TSUP family inner membrane protein                                         | -0.0723 | 0.0037 |
| JW2325 | mepA | murein DD-endopeptidase                                                         | -0.1091 | 0.1631 |
| JW2326 | aroC | chorismate synthase                                                             | 0.2733  | 0.0141 |
| JW2328 | yfcN | putative DNA endonuclease                                                       | -0.0060 | 0.8352 |
| JW2329 | yfcO | DUF2544 family putative outer membrane protein                                  | -0.0736 | 0.2228 |
| JW2330 | yfcP | putative fimbrial-like adhesin protein                                          | 0.0411  | 0.3136 |
| JW2331 | yfcQ | putative fimbrial-like adhesin protein                                          | -0.1597 | 0.0018 |
| JW2332 | yfcR | putative fimbrial-like adhesin protein                                          | -0.0241 | 0.6114 |
| JW2333 | yfcS | putative periplasmic pilin chaperone                                            | -0.0127 | 0.5204 |
| JW2334 | yfcT | pseudogene, FimD fimbrial export usher family                                   | 0.0209  | 0.7046 |
| JW2335 | yfcU | Putative outer membrane usher protein                                           | -0.0988 | 0.0035 |
| JW2336 | yfcV | putative fimbrial-like adhesin protein                                          | 0.0836  | 0.0900 |
| JW2337 | sixA | phosphohistidine phosphatase                                                    | 0.0755  | 0.1737 |
| JW2338 | yfcX | enoyl-CoA hydratase/epimerase and isomerase/3-hydroxyacyl-CoA dehydrogenase     | 0.0048  | 0.9649 |
| JW2339 | yfcY | beta-ketoacyl-CoA thiolase, anaerobic, subunit                                  | 0.0070  | 0.8014 |
| JW2340 | yfcZ | UPF0381 family protein                                                          | 0.0762  | 0.0000 |
| JW2341 | fadL | long-chain fatty acid outer membrane transporter                                | 0.0858  | 0.0278 |
| JW2342 | yfdF | uncharacterized protein                                                         | -0.0585 | 0.0511 |
| JW2343 | vacJ | ABC transporter maintaining OM lipid asymmetry, OM lipoprotein component        | -0.0381 | 0.1163 |
| JW2344 | yfdC | inner membrane protein                                                          | -0.0905 | 0.0005 |
| JW2345 | intS | CPS-53 (KpLE1) prophage; putative prophage CPS-53 integrase                     | 0.0377  | 0.1943 |
| JW2346 | yfdG | CPS-53 (KpLE1) prophage; bactoprenol-linked glucose translocase/flippase        | 0.0270  | 0.4380 |
| JW2347 | yfdH | CPS-53 (KpLE1) prophage; bactoprenol glucosyl transferase                       | -0.0140 | 0.3024 |
| JW2350 | yfdK | CPS-53 (KpLE1) prophage; conserved protein                                      | 0.1076  | 0.0000 |
| JW2352 | yfdM | CPS-53 (KpLE1) prophage; putative methyltransferase                             | 0.1235  | 0.0131 |
| JW2355 | yfdO | pseudogene, CPS-53 (KpLE1) prophage; bacteriophage replication protein O family | -0.0538 | 0.2931 |
| JW2356 | yfdP | CPS-53 (KpLE1) prophage; uncharacterized protein                                | -0.0334 | 0.0941 |

|        |      |                                                                                                |         |        |
|--------|------|------------------------------------------------------------------------------------------------|---------|--------|
| JW2357 | yfdQ | CPS-53 (KpLE1) prophage; uncharacterized protein                                               | 0.0274  | 0.5299 |
| JW2358 | yfdR | CPS-53 (KpLE1) prophage; conserved protein                                                     | -0.0067 | 0.8320 |
| JW2359 | yfdS | CPS-53 (KpLE1) prophage; uncharacterized protein                                               | -0.3320 | 0.0105 |
| JW2361 | dsdC | dsd operon activator; autorepressor                                                            | -0.0212 | 0.3364 |
| JW2362 | dsdX | D-serine transporter                                                                           | 0.0066  | 0.8713 |
| JW2363 | dsdA | D-serine dehydratase                                                                           | -0.0597 | 0.0451 |
| JW2364 | emrY | putative multidrug efflux system                                                               | -0.0890 | 0.3215 |
| JW2365 | emrK | multidrug resistance efflux pump membrane fusion protein                                       | -0.0184 | 0.4591 |
| JW2366 | evgA | response regulator in two-component regulatory system with EvgS                                | -0.0552 | 0.0541 |
| JW2367 | evgS | hybrid sensory histidine kinase in two-component regulatory system with EvgA                   | -0.0248 | 0.5989 |
| JW2368 | yfdE | acetyl-CoA:oxalate CoA-transferase                                                             | 0.0151  | 0.6653 |
| JW2369 | yfdV | putative transporter                                                                           | 0.0017  | 0.9066 |
| JW2370 | oxc  | oxalyl CoA decarboxylase, ThDP-dependent                                                       | -0.1448 | 0.4462 |
| JW2371 | frc  | formyl-CoA transferase, NAD(P)-binding                                                         | -0.0974 | 0.0000 |
| JW2372 | yfdX | uncharacterized protein                                                                        | -0.1949 | 0.0054 |
| JW2373 | ypdI | putative lipoprotein involved in colanic acid biosynthesis                                     | 0.0371  | 0.1284 |
| JW2374 | yfdY | DUF2545 family putative inner membrane protein                                                 | -0.0677 | 0.0174 |
| JW2375 | ddg  | palmitoleoyl-acyl carrier protein (ACP)-dependent acyltransferase                              | 0.0058  | 0.7523 |
| JW2376 | yfdZ | glutamate-pyruvate aminotransferase; glutamic-pyruvic transaminase (GPT); alanine transaminase | -0.0367 | 0.1572 |
| JW2378 | ypdB | response regulator activating yhjX; pyruvate-responsive YpdAB two-component system             | 0.0214  | 0.4002 |
| JW2379 | ypdC | putative DNA-binding protein                                                                   | -0.0453 | 0.0345 |
| JW2380 | ypdD | putative PTS enzyme: Hpr, enzyme I and IIA components                                          | -0.0547 | 0.1262 |
| JW2381 | ypdE | aminopeptidase                                                                                 | 0.0679  | 0.0402 |
| JW2382 | ypdF | Xaa-Pro aminopeptidase                                                                         | 0.0431  | 0.0631 |
| JW2383 | ypdG | putative enzyme IIC component of PTS                                                           | -0.0033 | 0.9116 |
| JW2385 | glk  | glucokinase                                                                                    | 0.0302  | 0.1200 |
| JW2386 | yfeO | putative ion channel protein                                                                   | 0.0176  | 0.5900 |
| JW2387 | ypeC | DUF2502 family putative periplasmic protein                                                    | 0.0377  | 0.2592 |
| JW2388 | mntH | manganese/divalent cation transporter                                                          | 0.0141  | 0.6219 |
| JW2389 | nupC | nucleoside (except guanosine) transporter                                                      | -0.0606 | 0.2614 |

|        |      |                                                                            |         |        |
|--------|------|----------------------------------------------------------------------------|---------|--------|
| JW2393 | yfeC | DUF1323 family putative DNA-binding protein                                | -0.0322 | 0.1663 |
| JW2394 | yfeD | DUF1323 family putative DNA-binding protein                                | 0.0265  | 0.1582 |
| JW2396 | xapR | transcriptional activator of xapAB                                         | -0.0500 | 0.1045 |
| JW2397 | xapB | xanthosine transporter                                                     | 0.0029  | 0.9095 |
| JW2398 | xapA | purine nucleoside phosphorylase 2; nicotinamide 1-beta-D-riboside synthase | 0.0463  | 0.2265 |
| JW2399 | yfeN | putative outer membrane protein                                            | -0.0817 | 0.0184 |
| JW2400 | yfeR | transcriptional regulator of yefH                                          | -0.0188 | 0.3940 |
| JW2406 | cysZ | sulfate transporter, sulfite inhibited                                     | -0.0242 | 0.6761 |
| JW2407 | cysK | cysteine synthase A, O-acetylserine sulfhydrolase A subunit                | 0.2926  | 0.0003 |
| JW2409 | ptsI | PEP-protein phosphotransferase of PTS system (enzyme I)                    | 0.0320  | 0.2443 |
| JW2410 | crr  | glucose-specific enzyme IIA component of PTS                               | -0.0080 | 0.7517 |
| JW2411 | pdxK | pyridoxal-pyridoxamine kinase/hydroxymethylpyrimidine kinase               | 0.0351  | 0.2046 |
| JW2412 | yfeK | uncharacterized protein                                                    | -0.0989 | 0.0330 |
| JW2413 | yfeS | WGR domain protein                                                         | 0.0182  | 0.7090 |
| JW2414 | cysM | cysteine synthase B (O-acetylserine sulfhydrolase B)                       | -0.0437 | 0.1120 |
| JW2415 | cysA | sulfate/thiosulfate transporter subunit                                    | -0.2400 | 0.0160 |
| JW2416 | cysW | sulfate/thiosulfate ABC transporter permease                               | -0.0337 | 0.2068 |
| JW2417 | cysU | sulfate/thiosulfate ABC transporter permease                               | -0.0024 | 0.9284 |
| JW2418 | cysP | thiosulfate-binding protein                                                | -0.2476 | 0.0005 |
| JW2420 | yfeT | repressor for murPQ, MurNAc 6-P inducible                                  | 0.0196  | 0.3906 |
| JW2421 | yfeU | N-acetylmuramic acid 6-phosphate (MurNAc-6-P) etherase                     | 0.0201  | 0.0613 |
| JW2422 | murP | N-acetylmuramic acid permease, EIIBC component, PTS system                 | -0.0270 | 0.6237 |
| JW2424 | yfeX | porphyrinogen oxidase, cytoplasmic                                         | -0.0339 | 0.0365 |
| JW2425 | yfeY | RpoE-regulated lipoprotein                                                 | 0.0737  | 0.0051 |
| JW2426 | yfeZ | inner membrane protein                                                     | 0.0460  | 0.3391 |
| JW2427 | ypeA | GNAT family putative N-acetyltransferase                                   | -0.0307 | 0.2788 |
| JW2428 | amiA | N-acetylmuramoyl-L-alanine amidase I                                       | 0.0234  | 0.4617 |
| JW2430 | yfeG | eut operon transcriptional activator, AraC family                          | 0.0331  | 0.2017 |
| JW2431 | yffI | putative ethanol utilization carboxysome structural protein                | 0.0561  | 0.1785 |
| JW2432 | eutL | putative ethanol utilization carboxysome structural protein                | 0.0061  | 0.9466 |
| JW2433 | eutC | ethanolamine ammonia-lyase, small subunit (light chain)                    | 0.0118  | 0.6930 |
| JW2434 | eutB | ethanolamine ammonia-lyase, large subunit, heavy chain                     | 0.0778  | 0.1627 |



|        |      |                                                                                |         |        |
|--------|------|--------------------------------------------------------------------------------|---------|--------|
| JW2435 | eutA | reactivating factor for ethanolamine ammonia lyase                             | -0.0701 | 0.0346 |
| JW2436 | eutH | ethanolamine transporter                                                       | 0.0610  | 0.0956 |
| JW2437 | eutG | ethanol dehydrogenase involved in ethanolamine utilization; aldehyde reductase | -0.0262 | 0.6688 |
| JW2438 | eutJ | ethanolamine utilization protein, HSP70/actin superfamily protein              | 0.0518  | 0.4260 |
| JW2439 | eutE | aldehyde oxidoreductase, ethanolamine utilization protein                      | 0.0872  | 0.0301 |
| JW2440 | cchB | Ethanolamine catabolic microcompartment shell protein                          | 0.0158  | 0.4792 |
| JW2441 | cchA | ethanolamine utilization protein, putative carboxysome structural protein      | -0.0805 | 0.0007 |
| JW2442 | eutI | phosphate acetyltransferase                                                    | 0.0050  | 0.8288 |
| JW2443 | eutT | cobalamin adenosyltransferase involved in ethanolamine utilization             | 0.0675  | 0.1331 |
| JW2444 | eutQ | RmlC-like cupin domain protein                                                 | 0.0926  | 0.0889 |
| JW2445 | eutP | putative P-loop NTPase ethanolamine utilization protein                        | -0.0010 | 0.9354 |
| JW2446 | ypfE | putative ethanol utilization carboxysome structural protein                    | 0.0548  | 0.0867 |
| JW2447 | maeB | malic enzyme: putative oxidoreductase/phosphotransacetylase                    | 0.0860  | 0.0832 |
| JW2448 | talA | transaldolase A                                                                | -0.0679 | 0.0294 |
| JW2449 | tktB | transketolase 2, thiamine triphosphate-binding                                 | -0.0497 | 0.4470 |
| JW2450 | ypfG | DUF1176 family protein                                                         | 0.1076  | 0.0188 |
| JW2451 | yffH | GDP-mannose pyrophosphatase                                                    | 0.0667  | 0.0882 |
| JW2452 | aegA | putative oxidoreductase, FeS binding subunit/NAD/FAD-binding subunit           | -0.1647 | 0.0918 |
| JW2453 | narQ | sensory histidine kinase in two-component regulatory system with NarP          | 0.0198  | 0.5278 |
| JW2454 | acrD | aminoglycoside/multidrug efflux system                                         | -0.0135 | 0.7716 |
| JW2455 | yffB | putative ArsC family reductase                                                 | -0.0513 | 0.2036 |
| JW2457 | ypfN | putative membrane protein, UPF0370 family                                      | -0.1107 | 0.0030 |
| JW2459 | ypfI | elongator methionine tRNA (ac4C34) acetyltransferase                           | -0.0052 | 0.7151 |
| JW2460 | ypfJ | putative neutral zinc metallopeptidase                                         | 0.0014  | 0.9123 |
| JW2461 | purC | phosphoribosylaminoimidazole-succinocarboxamide synthetase                     | 0.0137  | 0.7251 |
| JW2462 | nlpB | BamABCDE complex OM biogenesis lipoprotein                                     | 0.0176  | 0.5400 |
| JW2464 | gcvR | transcriptional repressor, regulatory protein accessory to GcvA                | 0.1989  | 0.0003 |
| JW2465 | bcp  | peroxiredoxin; thiol peroxidase, thioredoxin-dependent                         | 0.0800  | 0.0217 |
| JW2466 | hyfA | hydrogenase 4, 4Fe-4S subunit                                                  | -0.0309 | 0.6678 |
| JW2467 | hyfB | hydrogenase 4, membrane subunit                                                | 0.1175  | 0.0584 |

|        |      |                                                                                                                                             |         |        |
|--------|------|---------------------------------------------------------------------------------------------------------------------------------------------|---------|--------|
| JW2468 | hyfC | hydrogenase 4, membrane subunit                                                                                                             | 0.0756  | 0.0037 |
| JW2469 | hyfD | hydrogenase 4, membrane subunit                                                                                                             | -0.0129 | 0.7066 |
| JW2470 | hyfE | hydrogenase 4, membrane subunit                                                                                                             | 0.0021  | 0.9157 |
| JW2471 | hyfF | hydrogenase 4, membrane subunit                                                                                                             | -0.0258 | 0.4550 |
| JW2472 | hyfG | hydrogenase 4, subunit                                                                                                                      | -0.0633 | 0.0445 |
| JW2473 | hyfH | hydrogenase 4, Fe-S subunit                                                                                                                 | -0.0523 | 0.4157 |
| JW2475 | hyfJ | putative processing element hydrogenase 4                                                                                                   | 0.0269  | 0.4446 |
| JW2476 | hyfR | hydrogenase-4 transcriptional activator                                                                                                     | 0.0712  | 0.2149 |
| JW2477 | focB | putative formate transporter                                                                                                                | -0.0035 | 0.8672 |
| JW2478 | yfgO | putative UPF0118 family inner membrane permease                                                                                             | 0.0079  | 0.5329 |
| JW2479 | yfgC | OM protein maintenance and assembly metalloprotease and chaperone, periplasmic                                                              | 0.0784  | 0.0089 |
| JW2480 | yfgD | putative oxidoreductase                                                                                                                     | 0.0164  | 0.4352 |
| JW2482 | uraA | uracil permease                                                                                                                             | 0.0251  | 0.3986 |
| JW2483 | upp  | uracil phosphoribosyltransferase                                                                                                            | -0.0773 | 0.2397 |
| JW2484 | purM | phosphoribosylaminoimidazole synthetase                                                                                                     | -0.0056 | 0.8031 |
| JW2485 | purN | phosphoribosylglycinamide formyltransferase 1                                                                                               | -0.0613 | 0.3366 |
| JW2486 | ppk  | polyphosphate kinase, component of RNA degradosome                                                                                          | -0.0135 | 0.4811 |
| JW2487 | ppx  | exopolyphosphatase                                                                                                                          | 0.1699  | 0.0146 |
| JW2488 | yfgF | cyclic-di-GMP phosphodiesterase, anaerobic                                                                                                  | -0.0289 | 0.1282 |
| JW2490 | yfgI | nalidixic acid resistance protein, putative periplasmic protein                                                                             | -0.0616 | 0.1635 |
| JW2491 | guaA | GMP synthetase (glutamine aminotransferase)                                                                                                 | -0.0198 | 0.2328 |
| JW2493 | xseA | exonuclease VII, large subunit                                                                                                              | -0.0177 | 0.4663 |
| JW2496 | yfgL | BamABCDE complex OM biogenesis lipoprotein                                                                                                  | 0.1093  | 0.0171 |
| JW2497 | yfgM | ancillary SecYEG translocon subunit; putative anti-RcsB factor                                                                              | 0.0094  | 0.5549 |
| JW2500 | yfgA | MreB assembly cytoskeletal protein                                                                                                          | 0.0045  | 0.9238 |
| JW2501 | yfgB | dual specificity 23S rRNA m(2)A2503, tRNA m(2)A37 methyltransferase, SAM-dependent                                                          | 0.0171  | 0.6402 |
| JW2502 | ndk  | multifunctional nucleoside diphosphate kinase and apyrimidinic endonuclease and 3'-phosphodiesterase                                        | 0.1258  | 0.0255 |
| JW2503 | pbpC | penicillin-insensitive murein repair transglycosylase; inactive transpeptidase domain protein                                               | 0.0444  | 0.1014 |
| JW2504 | yfhM | bacterial alpha2-macroglobulin colonization factor ECAM; anti-host protease defense factor; periplasmic inner membrane-anchored lipoprotein | 0.0318  | 0.1921 |
| JW2505 | sseA | 3-mercaptopyruvate sulfurtransferase                                                                                                        | 0.0612  | 0.0305 |
| JW2507 | pepB | aminopeptidase B                                                                                                                            | 0.1900  | 0.0098 |
| JW2508 | yfhJ | Fe(2+) donor and activity modulator for cysteine desulfurase                                                                                | -0.0333 | 0.1848 |

|        |      |                                                                                                                                            |         |        |
|--------|------|--------------------------------------------------------------------------------------------------------------------------------------------|---------|--------|
| JW2509 | fdx  | [2Fe-2S] ferredoxin                                                                                                                        | -0.0479 | 0.2900 |
| JW2510 | hscA | DnaK-like molecular chaperone specific for IscU                                                                                            | 0.1013  | 0.0193 |
| JW2511 | hscB | HscA co-chaperone, J domain-containing protein Hsc56; IscU-specific chaperone HscAB                                                        | 0.0111  | 0.4607 |
| JW2512 | iscA | FeS cluster assembly protein                                                                                                               | 0.0818  | 0.1244 |
| JW2513 | iscU | iron-sulfur cluster assembly scaffold protein                                                                                              | 0.0933  | 0.1165 |
| JW2514 | iscS | cysteine desulfurase (tRNA sulfurtransferase), PLP-dependent                                                                               | 0.0116  | 0.5515 |
| JW2515 | iscR | isc operon transcriptional repressor; suf operon transcriptional activator; oxidative stress- and iron starvation-inducible; autorepressor | 0.0688  | 0.0074 |
| JW2516 | yfhQ | tRNA mC32,mU32 2'-O-methyltransferase, SAM-dependent                                                                                       | -0.0152 | 0.5430 |
| JW2518 | yfhR | putative S9 family prolyl oligopeptidase                                                                                                   | -0.0072 | 0.4300 |
| JW2520 | hcaT | putative 3-phenylpropionic transporter                                                                                                     | 0.0003  | 0.9916 |
| JW2521 | hcaR | hca operon transcriptional regulator                                                                                                       | -0.0614 | 0.0122 |
| JW2522 | hcaE | 3-phenylpropionate dioxygenase, large (alpha) subunit                                                                                      | -0.0158 | 0.4730 |
| JW2523 | hcaF | 3-phenylpropionate dioxygenase, small (beta) subunit                                                                                       | -0.1066 | 0.0000 |
| JW2524 | hcaC | 3-phenylpropionate dioxygenase, ferredoxin subunit                                                                                         | 0.0457  | 0.0023 |
| JW2525 | hcaB | 2,3-dihydroxy-2,3-dihydrophenylpropionate dehydrogenase                                                                                    | -0.0221 | 0.8225 |
| JW2526 | hcaD | phenylpropionate dioxygenase, ferredoxin reductase subunit                                                                                 | -0.7065 | 0.0001 |
| JW2527 | yphA | DoxX family inner membrane protein                                                                                                         | -0.0148 | 0.5573 |
| JW2528 | yphB | mutarotase superfamily protein, YphB family                                                                                                | 0.0211  | 0.5862 |
| JW2530 | yphD | putative sugar ABC transporter permease                                                                                                    | 0.0986  | 0.0011 |
| JW2531 | yphE | putative sugar ABC transporter ATPase                                                                                                      | -0.0061 | 0.8655 |
| JW2535 | glyA | serine hydroxymethyltransferase                                                                                                            | 0.2974  | 0.0498 |
| JW2535 | glyA | serine hydroxymethyltransferase                                                                                                            | 0.3433  | 0.0355 |
| JW2536 | hmp  | fused nitric oxide dioxygenase/dihydropteridine reductase 2                                                                                | -0.2541 | 0.0189 |
| JW2537 | glnB | regulatory protein P-II for glutamine synthetase                                                                                           | 0.0259  | 0.7961 |
| JW2538 | yfhA | response regulator regulating glmY sRNA in two-component system with sensor protein GlrK                                                   | 0.0701  | 0.1638 |

|        |      |                                                               |         |        |
|--------|------|---------------------------------------------------------------|---------|--------|
| JW2539 | yfhG | putative outer membrane protein modulating the QseEF response | 0.0638  | 0.1894 |
| JW2541 | purL | phosphoribosylformyl-glycineamide synthetase                  | -0.0006 | 0.9878 |
| JW2542 | yfhD | membrane-bound lytic transglycosylase F, murein hydrolase     | -0.0068 | 0.7600 |
| JW2545 | yfhH | putative DNA-binding transcriptional regulator                | 0.0888  | 0.0022 |
| JW2546 | yfhL | putative 4Fe-4S cluster-containing protein                    | 0.0398  | 0.0317 |
| JW2548 | pdxJ | pyridoxine 5'-phosphate synthase                              | 0.0662  | 0.1345 |
| JW2549 | recO | gap repair protein                                            | 0.0113  | 0.4539 |
| JW2553 | lepA | back-translocating elongation factor EF4, GTPase              | 0.0425  | 0.0081 |
| JW2554 | rseC | SoxR iron-sulfur cluster reduction factor component           | -0.0221 | 0.4516 |
| JW2555 | rseB | anti-sigma E factor, binds RseA                               | -0.1032 | 0.1244 |
| JW2558 | nadB | quinolinate synthase, L-aspartate oxidase (B protein) subunit | 0.3788  | 0.0000 |
| JW2559 | yfiC | tRNA1(Val) (adenine(37)-N6)-methyltransferase                 | -0.0827 | 0.0007 |
| JW2560 | srnB | ATP-dependent RNA helicase                                    | -0.0439 | 0.2081 |
| JW2561 | yfiE | putative DNA-binding transcriptional regulator                | 0.0209  | 0.4644 |
| JW2562 | yfiK | cysteine and O-acetylserine exporter                          | 0.0154  | 0.4331 |
| JW2563 | yfiD | autonomous glycyl radical cofactor                            | -0.0160 | 0.4399 |
| JW2564 | ung  | uracil-DNA-glycosylase                                        | 0.0208  | 0.4352 |
| JW2565 | yfiF | putative methyltransferase                                    | 0.0072  | 0.7919 |
| JW2566 | trxC | thioredoxin 2                                                 | -0.0801 | 0.1058 |
| JW2568 | yfiQ | protein lysine acetyltransferase                              | -0.0361 | 0.1885 |
| JW2570 | yfiM | putative lipoprotein                                          | -0.0132 | 0.6138 |
| JW2571 | kgfP | alpha-ketoglutarate transporter                               | -0.0205 | 0.4281 |
| JW2575 | yfiH | UPF0124 family protein                                        | -0.0302 | 0.5315 |
| JW2576 | rluD | 23S rRNA pseudouridine(1911,1915,1917) synthase               | -0.0270 | 0.1205 |
| JW2578 | yfiA | cold shock protein associated with 30S ribosomal subunit      | 0.0651  | 0.0065 |
| JW2579 | pheL | pheA gene leader peptide                                      | 0.0317  | 0.0143 |
| JW2580 | pheA | chorismate mutase and prephenate dehydratase, P-protein       | -0.0156 | 0.7117 |
| JW2581 | tyrA | fused chorismate mutase T/prephenate dehydrogenase            | -0.0241 | 0.7685 |
| JW2584 | yfiR | putative periplasmic inhibitor of YfiN activity               | -0.1375 | 0.0377 |
| JW2585 | yfiN | putative membrane-anchored diguanylate cyclase                | 0.0527  | 0.0149 |
| JW2592 | ypjD | cytochrome c assembly protein family inner membrane protein   | -0.0889 | 0.0014 |
| JW2598 | smpA | lipoprotein component of BamABCDE OM biogenesis complex       | 0.0512  | 0.3749 |
| JW2599 | yjfF | UPF0125 family protein                                        | 0.0202  | 0.3843 |

|        |      |                                                                                                |         |        |
|--------|------|------------------------------------------------------------------------------------------------|---------|--------|
| JW2600 | yfgG | toxic UPF0083 family protein inhibitor of 70S ribosome formation                               | 0.0622  | 0.0524 |
| JW2601 | smpB | tmRNA-binding trans-translation protein                                                        | -0.0466 | 0.0467 |
| JW2602 | intA | CP4-57 prophage; integrase                                                                     | -0.0843 | 0.0318 |
| JW2603 | yfhH | CP4-57 prophage; uncharacterized protein                                                       | 0.0089  | 0.4249 |
| JW2604 | alpA | CP4-57 prophage; DNA-binding transcriptional activator                                         | -0.0441 | 0.2381 |
| JW2605 | yfjI | CP4-57 prophage; uncharacterized protein                                                       | -0.0801 | 0.0013 |
| JW2607 | yfjJ | CP4-57 prophage; uncharacterized protein                                                       | 0.0525  | 0.0292 |
| JW2608 | yfjK | radiation resistance protein; DEAD/H helicase-like protein; CP4-57 putative defective prophage | 0.0699  | 0.0491 |
| JW2609 | yfjL | CP4-57 putative defective prophage, DUF4297/DUF1837 polymorphic toxin family protein           | -0.0327 | 0.0205 |
| JW2610 | yfjM | CP4-57 prophage; uncharacterized protein                                                       | -0.0211 | 0.2835 |
| JW2611 | yfjN | CP4-57 prophage; RNase LS                                                                      | 0.0155  | 0.6818 |
| JW2614 | yfqQ | CP4-57 prophage; uncharacterized protein                                                       | -0.0594 | 0.1910 |
| JW2615 | yfjR | CP4-57 prophage; putative DNA-binding transcriptional regulator                                | -0.2140 | 0.0039 |
| JW2618 | yfjT | CP4-57 prophage; putative periplasmic protein                                                  | -0.0209 | 0.6527 |
| JW2619 | yfjU | CP4-57 prophage; conserved protein                                                             | 0.0836  | 0.0004 |
| JW2621 | yfvV | Uncharacterized protein                                                                        | 0.2336  | 0.0138 |
| JW2623 | yfwW | CP4-57 prophage; putative inner membrane protein                                               | -0.0092 | 0.8187 |
| JW2624 | yfxX | CP4-57 prophage; putative antirestriction protein                                              | 0.1064  | 0.1725 |
| JW2625 | yfyY | CP4-57 prophage; putative DNA repair protein                                                   | -0.0428 | 0.1744 |
| JW2626 | yfzZ | CP4-57 prophage; antitoxin of the YpjF-YfjZ toxin-antitoxin system                             | 0.0097  | 0.6267 |
| JW2627 | ypjF | CP4-57 prophage; toxin of the YpjF-YfjZ toxin-antitoxin system                                 | 0.0247  | 0.2260 |
| JW2629 | ypjB | pseudogene                                                                                     | -0.0457 | 0.0509 |
| JW2631 | ygaR | Putative uncharacterized protein                                                               | -0.0695 | 0.0834 |
| JW2633 | yqaD | Putative uncharacterized protein                                                               | 0.0511  | 0.0037 |
| JW2635 | ygaF | L-2-hydroxyglutarate oxidase                                                                   | 0.0212  | 0.4235 |
| JW2636 | gabD | succinate-semialdehyde dehydrogenase I, NADP-dependent                                         | 0.0184  | 0.4521 |
| JW2637 | gabT | 4-aminobutyrate aminotransferase, PLP-dependent                                                | -0.0086 | 0.6653 |
| JW2638 | gabP | gamma-aminobutyrate transporter                                                                | -0.0599 | 0.0977 |
| JW2639 | csiR | transcriptional repressor of csiD                                                              | -0.0334 | 0.5059 |
| JW2640 | ygaU | uncharacterized protein                                                                        | 0.0008  | 0.9769 |
| JW2642 | ygaV | tributyltin-inducible repressor of ygaVP                                                       | 0.1232  | 0.0751 |

|        |      |                                                                                                                                                                                                    |         |        |
|--------|------|----------------------------------------------------------------------------------------------------------------------------------------------------------------------------------------------------|---------|--------|
| JW2643 | ygaP | DUF2892 family inner membrane rhodanese                                                                                                                                                            | -0.0182 | 0.6325 |
| JW2644 | stpA | DNA binding protein, nucleoid-associated                                                                                                                                                           | -0.0278 | 0.5390 |
| JW2645 | ygaW | alanine exporter, alanine-inducible, stress-responsive                                                                                                                                             | -0.0165 | 0.4885 |
| JW2646 | ygaC | uncharacterized protein                                                                                                                                                                            | 0.0378  | 0.3563 |
| JW2647 | ygaM | putative membrane-anchored DUF883 family ribosome-binding protein                                                                                                                                  | 0.0926  | 0.0004 |
| JW2648 | nrdH | hydrogen donor for NrdEF electron transport system; glutaredoxin-like protein                                                                                                                      | 0.0915  | 0.0007 |
| JW2649 | nrdI | NrdEF cluster assembly flavodoxin                                                                                                                                                                  | 0.0024  | 0.8950 |
| JW2650 | nrdE | ribonucleoside-diphosphate reductase 2, alpha subunit                                                                                                                                              | -0.1750 | 0.2653 |
| JW2651 | nrdF | ribonucleoside-diphosphate reductase 2, beta subunit, ferritin-like protein                                                                                                                        | -0.0176 | 0.4554 |
| JW2652 | proV | glycine betaine/proline ABC transporter periplasmic binding protein                                                                                                                                | 0.0104  | 0.7438 |
| JW2653 | proW | glycine betaine/proline ABC transporter permease                                                                                                                                                   | 0.1381  | 0.0060 |
| JW2654 | proX | glycine betaine/proline ABC transporter periplasmic binding protein; cold shock protein                                                                                                            | 0.0522  | 0.2245 |
| JW2655 | ygaX | pseudogene, major facilitator transporter superfamily                                                                                                                                              | 0.1140  | 0.0174 |
| JW2657 | ygaZ | putative L-valine exporter, norvaline resistance protein                                                                                                                                           | 0.0629  | 0.0714 |
| JW2658 | ygaH | putative L-valine exporter, norvaline resistance protein                                                                                                                                           | 0.0664  | 0.0040 |
| JW2659 | mprA | transcriptional repressor of microcin B17 synthesis and multidrug efflux                                                                                                                           | 0.0212  | 0.1216 |
| JW2660 | emrA | multidrug efflux system                                                                                                                                                                            | -0.0903 | 0.0243 |
| JW2661 | emrB | multidrug efflux system protein                                                                                                                                                                    | 0.0445  | 0.0825 |
| JW2662 | luxS | S-ribosylhomocysteine lyase                                                                                                                                                                        | -0.0338 | 0.7338 |
| JW2663 | gshA | glutamate-cysteine ligase                                                                                                                                                                          | -0.1085 | 0.0051 |
| JW2664 | yqaA | COG1238 family inner membrane protein                                                                                                                                                              | 0.0361  | 0.2573 |
| JW2667 | alaS | alanyl-tRNA synthetase                                                                                                                                                                             | 0.1678  | 0.0069 |
| JW2668 | recX | regulatory protein for RecA                                                                                                                                                                        | -0.2204 | 0.0374 |
| JW2669 | recA | DNA recombination and repair protein; ssDNA-dependent ATPase; synaptase; ssDNA and dsDNA binding protein; ATP-dependent homologous DNA strand exchanger; recombinase A; LexA autocleavage cofactor | -0.0881 | 0.2977 |
| JW2670 | ygaD | nicotinamide-nucleotide amidohydrolase; NMN amidohydrolase                                                                                                                                         | -0.0479 | 0.0775 |
| JW2671 | mltB | membrane-bound lytic murein transglycosylase B                                                                                                                                                     | -0.0138 | 0.5624 |
| JW2673 | srIB | glucitol/sorbitol-specific enzyme IIA component of PTS                                                                                                                                             | 0.0589  | 0.2675 |
| JW2674 | srID | sorbitol-6-phosphate dehydrogenase                                                                                                                                                                 | 0.0136  | 0.3603 |

|        |      |                                                              |         |        |
|--------|------|--------------------------------------------------------------|---------|--------|
| JW2675 | gutM | sorbitol-responsive srl operon transcriptional activator     | -0.0080 | 0.7956 |
| JW2676 | srlR | sorbitol-inducible srl operon transcriptional repressor      | -0.0794 | 0.0022 |
| JW2680 | norV | anaerobic nitric oxide reductase flavorubredoxin             | -0.0220 | 0.5326 |
| JW2681 | norW | NADH:flavorubredoxin oxidoreductase                          | 0.0672  | 0.0184 |
| JW2683 | hydN | formate dehydrogenase-H, [4Fe-4S] ferredoxin subunit         | -0.1696 | 0.0070 |
| JW2686 | ascB | cryptic 6-phospho-beta-glucosidase                           | 0.0829  | 0.0184 |
| JW2687 | hycI | protease involved in processing C-terminal end of HycE       | 0.0126  | 0.7005 |
| JW2688 | hycH | hydrogenase 3 maturation protein                             | -0.1712 | 0.0076 |
| JW2689 | hycG | hydrogenase 3 and formate hydrogenase complex, HycG subunit  | 0.1157  | 0.1801 |
| JW2690 | hycF | formate hydrogenlyase complex iron-sulfur protein            | 0.0798  | 0.0029 |
| JW2691 | hycE | hydrogenase 3, large subunit                                 | -0.0527 | 0.0223 |
| JW2692 | hycD | hydrogenase 3, membrane subunit                              | 0.0059  | 0.9212 |
| JW2693 | hycC | hydrogenase 3, membrane subunit                              | -0.0016 | 0.9639 |
| JW2694 | hycB | hydrogenase 3, Fe-S subunit                                  | -0.2690 | 0.0110 |
| JW2695 | hycA | regulator of the transcriptional regulator FhlA              | 0.0462  | 0.1139 |
| JW2696 | hypA | protein involved in nickel insertion into hydrogenases 3     | 0.0275  | 0.3217 |
| JW2697 | hypB | GTP hydrolase involved in nickel liganding into hydrogenases | 0.1281  | 0.0000 |
| JW2698 | hypC | hydrogenase maturation protein                               | -0.0991 | 0.0016 |
| JW2699 | hypD | hydrogenase maturation protein                               | 0.0259  | 0.3594 |
| JW2700 | hypE | carbamoyl dehydratase, hydrogenases 1,2,3 maturation protein | 0.0263  | 0.2018 |
| JW2701 | fhlA | formate hydrogenlyase transcriptional activator              | -0.0160 | 0.5560 |
| JW2702 | ygbA | uncharacterized protein                                      | 0.0346  | 0.1904 |
| JW2703 | mutS | methyl-directed mismatch repair protein                      | 0.0527  | 0.0996 |
| JW2704 | pphB | serine/threonine-specific protein phosphatase 2              | 0.0591  | 0.0059 |
| JW2705 | ygbI | DeoR family putative transcriptional regulator               | -0.1130 | 0.0005 |
| JW2706 | ygbJ | putative dehydrogenase                                       | -0.0397 | 0.4228 |
| JW2707 | ygbK | FliA-regulated DUF1537 family protein                        | -0.0206 | 0.5396 |
| JW2708 | ygbL | putative class II aldolase                                   | -0.0284 | 0.4346 |
| JW2709 | ygbM | putative hydroxypyruvate isomerase                           | -0.0109 | 0.7338 |
| JW2710 | ygbN | putative transporter                                         | 0.0755  | 0.1304 |

|        |      |                                                                                                      |         |        |
|--------|------|------------------------------------------------------------------------------------------------------|---------|--------|
| JW2712 | nlpD | activator of AmiC murein hydrolase activity, lipoprotein                                             | 0.0133  | 0.8867 |
| JW2713 | pcm  | L-isoaspartate protein<br>carboxymethyltransferase type II                                           | -0.0509 | 0.0248 |
| JW2714 | surE | broad specificity 5'(3')-nucleotidase and polyphosphatase                                            | 0.0114  | 0.5735 |
| JW2715 | truD | tRNA(Glu) pseudouridine(13) synthase                                                                 | 0.0435  | 0.0610 |
| JW2719 | ygbE | DUF3561 family inner membrane protein                                                                | 0.0599  | 0.0582 |
| JW2720 | cysC | adenosine 5'-phosphosulfate kinase                                                                   | 0.1529  | 0.0003 |
| JW2721 | cysN | sulfate adenylyltransferase, subunit 1                                                               | 0.0892  | 0.3571 |
| JW2722 | cysD | sulfate adenylyltransferase, subunit 2                                                               | 0.1721  | 0.0091 |
| JW2723 | iap  | aminopeptidase in alkaline phosphatase isozyme conversion                                            | -0.0683 | 0.2455 |
| JW2725 | ygbT | multifunctional endonuclease Cas1, CRISPR adaptation protein; DNA repair enzyme                      | -0.0009 | 0.9775 |
| JW2726 | ygcH | CRISPR RNA precursor cleavage enzyme; CRISP RNA (crRNA) containing Cascade antiviral complex protein | -0.0350 | 0.0548 |
| JW2728 | ygcJ | CRISP RNA (crRNA) containing Cascade antiviral complex protein                                       | 0.0291  | 0.5752 |
| JW2729 | ygcK | CRISP RNA (crRNA) containing Cascade antiviral complex protein                                       | 0.0140  | 0.7262 |
| JW2730 | ygcL | CRISP RNA (crRNA) containing Cascade antiviral complex protein                                       | -0.0132 | 0.6059 |
| JW2731 | ygcB | Cascade complex anti-viral R-loop helicase-annealase Cas3                                            | 0.0379  | 0.0853 |
| JW2732 | cysH | phosphoadenosine phosphosulfate reductase; PAPS reductase, thioredoxin dependent                     | 0.3604  | 0.0000 |
| JW2733 | cysI | sulfite reductase, beta subunit, NAD(P)-binding, heme-binding                                        | 0.1774  | 0.0000 |
| JW2734 | cysJ | sulfite reductase, alpha subunit, flavoprotein                                                       | 0.1326  | 0.1554 |
| JW2735 | ygcM | 6-pyruvoyl tetrahydrobiopterin synthase (PTPS)                                                       | 0.0350  | 0.0245 |
| JW2736 | ygcN | putative oxidoreductase                                                                              | -0.0508 | 0.0092 |
| JW2737 | ygcO | putative 4Fe-4S cluster-containing protein                                                           | 0.3123  | 0.0008 |
| JW2738 | ygcP | putative antiterminator regulatory protein                                                           | 0.0247  | 0.4482 |
| JW2746 | yqcE | putative MFS transporter, inner membrane protein                                                     | 0.0866  | 0.0002 |
| JW2748 | ygcF | 7-carboxy-7-deazaguanine synthase; queosine biosynthesis                                             | -0.0337 | 0.4936 |
| JW2752 | mazG | nucleoside triphosphate pyrophosphohydrolase                                                         | -0.0887 | 0.0207 |
| JW2753 | chpA | mRNA interferase toxin, antitoxin is MazE                                                            | 0.2457  | 0.0769 |
| JW2755 | relA | (p)ppGpp synthetase I/GTP pyrophosphokinase                                                          | 0.0977  | 0.0015 |
| JW2756 | rumA | 23S rRNA m(5)U1939 methyltransferase, SAM-dependent                                                  | 0.0213  | 0.3252 |
| JW2757 | barA | hybrid sensory histidine kinase, in two-component regulatory system with UvrY                        | -0.1331 | 0.0044 |
| JW2758 | gudD | D-glucarate dehydratase 1                                                                            | 0.0013  | 0.9546 |



|        |      |                                                                        |         |        |
|--------|------|------------------------------------------------------------------------|---------|--------|
| JW2759 | gudX | glucarate dehydratase-related protein, substrate unknown               | -0.0140 | 0.5001 |
| JW2760 | gudP | putative D-glucarate transporter                                       | 0.0191  | 0.3957 |
| JW2761 | yqcA | short-chain flavodoxin, FMN-binding                                    | 0.0354  | 0.3279 |
| JW2762 | yqcB | tRNA(Ile1,Asp) pseudouridine(65) synthase                              | 0.0023  | 0.9098 |
| JW2763 | yqcC | DUF446 family protein                                                  | 0.0566  | 0.0545 |
| JW2764 | syd  | SecY-interacting protein                                               | 0.0048  | 0.9161 |
| JW2765 | yqcD | 7-cyano-7-deazaguanine reductase (NADPH-dependent)                     | -0.0253 | 0.7767 |
| JW2766 | ygdH | pyrimidine/purine nucleotide 5'-monophosphate nucleosidase             | 0.0349  | 0.0314 |
| JW2767 | sdaC | putative serine transporter                                            | 0.1022  | 0.0137 |
| JW2768 | sdaB | L-serine dehydratase 2                                                 | 0.1047  | 0.0501 |
| JW2770 | fucO | L-1,2-propanediol oxidoreductase                                       | 0.0236  | 0.4115 |
| JW2771 | fucA | L-fucose-1-phosphate aldolase                                          | 0.1777  | 0.1235 |
| JW2772 | fucP | L-fucose transporter                                                   | -0.0481 | 0.1106 |
| JW2773 | fucI | L-fucose isomerase                                                     | -0.1635 | 0.0836 |
| JW2774 | fucK | L-fuculokinase                                                         | 0.0104  | 0.5853 |
| JW2775 | fucU | L-fucose mutarotase                                                    | 0.0421  | 0.2240 |
| JW2776 | fucR | l-fucose operon activator                                              | -0.0442 | 0.0801 |
| JW2777 | ygdE | 23S rRNA C2498 2'-O-ribose methyltransferase, SAM-dependent            | 0.1469  | 0.0183 |
| JW2778 | ygdD | UPF0382 family inner membrane protein                                  | 0.1703  | 0.0001 |
| JW2779 | gcvA | glycine cleavage system transcriptional activator; autorepressor       | -0.0229 | 0.6407 |
| JW2781 | csdA | cysteine sulfinatase desulfinate                                       | -0.0371 | 0.1088 |
| JW2782 | ygdK | CsdA-binding activator; Fe-S protein                                   | -0.0467 | 0.0465 |
| JW2784 | mltA | membrane-bound lytic murein transglycosylase A                         | 0.0013  | 0.9749 |
| JW2786 | argA | amino acid N-acetyltransferase and inactive acetylglutamate kinase     | -0.0447 | 0.6990 |
| JW2787 | recD | exonuclease V (RecBCD complex), alpha chain                            | 0.0653  | 0.1949 |
| JW2788 | recB | exonuclease V (RecBCD complex), beta subunit                           | -0.0654 | 0.5322 |
| JW2790 | recC | exonuclease V (RecBCD complex), gamma chain                            | 0.0954  | 0.1783 |
| JW2791 | ppdC | putative prepilin peptidase-dependent protein                          | 0.0207  | 0.4434 |
| JW2794 | ppdA | putative prepilin peptidase-dependent protein                          | 0.0557  | 0.1047 |
| JW2795 | thyA | thymidylate synthetase                                                 | -0.0134 | 0.0626 |
| JW2797 | ptsP | PEP-protein phosphotransferase enzyme I; GAF domain containing protein | -0.0546 | 0.2101 |
| JW2798 | nudH | RNA pyrophosphohydrolase                                               | -0.1258 | 0.3207 |
| JW2799 | mutH | methyl-directed mismatch repair protein                                | -0.0750 | 0.2108 |
| JW2800 | ygdQ | UPF0053 family inner membrane protein                                  | 0.0217  | 0.7478 |

|        |      |                                                                                               |         |        |
|--------|------|-----------------------------------------------------------------------------------------------|---------|--------|
| JW2801 | ygdR | DUF903 family verified lipoprotein                                                            | -0.1008 | 0.0168 |
| JW2802 | tas  | putative NADP(H)-dependent aldo-keto reductase                                                | 0.0205  | 0.5772 |
| JW2803 | ygeD | lysophospholipid transporter                                                                  | -0.0353 | 0.0729 |
| JW2804 | aas  | fused 2-acylglycerophospho-ethanolamine acyl transferase/acyl-acyl carrier protein synthetase | 0.0879  | 0.0067 |
| JW2805 | galR | galactose-inducible d-galactose regulon transcriptional repressor; autorepressor              | -0.2876 | 0.0138 |
| JW2806 | lysA | diaminopimelate decarboxylase, PLP-binding                                                    | 0.0516  | 0.0775 |
| JW2807 | lysR | transcriptional activator of lysA; autorepressor                                              | 0.1592  | 0.0001 |
| JW2808 | ygeA | Asp/Glu_racemase family protein                                                               | 0.0073  | 0.6703 |
| JW2809 | araE | arabinose transporter                                                                         | 0.0368  | 0.3448 |
| JW2810 | kduD | 2-dehydro-3-deoxy-D-gluconate 5-dehydrogenase; KDG oxidoreductase; 20-ketosteroid reductase   | 0.0038  | 0.9359 |
| JW2811 | kduI | hexuronate isomerase                                                                          | -0.1385 | 0.1049 |
| JW2813 | yqeG | putative transporter                                                                          | 0.0567  | 0.3052 |
| JW2815 | yqeI | putative transcriptional regulator                                                            | 0.0044  | 0.9160 |
| JW2817 | yqeK | uncharacterized protein                                                                       | -0.3085 | 0.0502 |
| JW2818 | ygeF | pseudogene                                                                                    | -0.0541 | 0.1619 |
| JW2819 | ygeG | SycD-like chaperone family TPR-repeat-containing protein                                      | 0.0744  | 0.0898 |
| JW2820 | ygeH | putative transcriptional regulator                                                            | 0.0171  | 0.2244 |
| JW2824 | ygeL | Putative uncharacterized protein                                                              | 0.0875  | 0.0164 |
| JW2831 | ygeP | pseudogene, glycosyl hydrolase family 15, part of T3SS PAI ETT2 remnant                       | -0.0196 | 0.1273 |
| JW2833 | ygeR | LysM domain-containing M23 family putative peptidase; septation lipoprotein                   | -0.0293 | 0.4907 |
| JW2835 | xdhB | xanthine dehydrogenase, FAD-binding subunit                                                   | 0.0090  | 0.8525 |
| JW2836 | xdhC | xanthine dehydrogenase, Fe-S binding subunit                                                  | 0.0840  | 0.2549 |
| JW2837 | ygeV | putative sigma-54-interacting transcriptional activator                                       | 0.0138  | 0.6525 |
| JW2839 | ygeX | 2,3-diaminopropionate ammonia lyase, PLP-dependent                                            | -0.1030 | 0.0248 |
| JW2840 | ygeY | putative peptidase                                                                            | -0.1933 | 0.0096 |
| JW2841 | hyuA | D-stereospecific phenylhydantoinase                                                           | 0.0042  | 0.9204 |
| JW2842 | yqeA | putative amino acid kinase                                                                    | 0.0373  | 0.6140 |
| JW2843 | yqeB | XdhC-CoxI family protein with NAD(P)-binding Rossmann fold                                    | -0.0869 | 0.0114 |
| JW2845 | ygfJ | CTP:molybdopterin cytidyltransferase                                                          | -0.0133 | 0.5067 |

|        |      |                                                                                                                    |         |        |
|--------|------|--------------------------------------------------------------------------------------------------------------------|---------|--------|
| JW2848 | ygfM | putative oxidoreductase                                                                                            | -0.0558 | 0.1460 |
| JW2849 | xdhD | putative hypoxanthine oxidase,<br>molybdopterin-binding/Fe-S binding                                               | 0.0406  | 0.0736 |
| JW2850 | ygfO | xanthine permease                                                                                                  | 0.1879  | 0.0630 |
| JW2857 | idi  | isopentenyl diphosphate isomerase                                                                                  | 0.0709  | 0.2549 |
| JW2858 | lysS | lysine tRNA synthetase, constitutive                                                                               | -0.0759 | 0.3401 |
| JW2860 | recJ | ssDNA exonuclease, 5' --> 3'-specific                                                                              | -0.0459 | 0.1438 |
| JW2861 | dsbC | protein disulfide isomerase II                                                                                     | 0.0541  | 0.0571 |
| JW2862 | xerD | site-specific tyrosine recombinase                                                                                 | 0.0319  | 0.3310 |
| JW2863 | fldB | flavodoxin 2                                                                                                       | 0.1652  | 0.0008 |
| JW2865 | ygfY | flavinator of succinate dehydrogenase;<br>antitoxin of CptAB toxin-antitoxin pair                                  | 0.1886  | 0.0000 |
| JW2866 | ygfZ | iron-sulfur cluster repair protein, plumbagin<br>resistance                                                        | -0.3678 | 0.0001 |
| JW2867 | yqfA | hemolysin III family HyLIII inner membrane<br>protein                                                              | 0.1694  | 0.0026 |
| JW2868 | yqfB | UPF0267 family protein                                                                                             | -0.0912 | 0.2583 |
| JW2869 | bglA | 6-phospho-beta-glucosidase A                                                                                       | 0.0395  | 0.1475 |
| JW2870 | ygfF | putative NAD(P)-dependent oxidoreductase                                                                           | -0.0053 | 0.8161 |
| JW2871 | gcvP | glycine decarboxylase, PLP-dependent,<br>subunit P of glycine cleavage complex                                     | -0.1392 | 0.0016 |
| JW2872 | gcvH | glycine cleavage system lipoylprotein H,<br>methylamine group carrier                                              | 0.0172  | 0.8265 |
| JW2873 | gcvT | aminomethyltransferase, tetrahydrofolate-<br>dependent, subunit (T protein) of glycine<br>cleavage complex         | -0.0314 | 0.2921 |
| JW2874 | visC | 2-octaprenylphenol hydroxylase, FAD-<br>dependent                                                                  | -0.0584 | 0.2243 |
| JW2875 | ubiH | 2-octaprenyl-6-methoxyphenol hydroxylase,<br>FAD/NAD(P)-binding                                                    | -0.0838 | 0.1794 |
| JW2876 | pepP | proline aminopeptidase P II                                                                                        | 0.0342  | 0.4681 |
| JW2878 | zapA | FtsZ stabilizer                                                                                                    | 0.0086  | 0.7267 |
| JW2879 | ygfA | 5-formyltetrahydrofolate cyclo-ligase family<br>protein                                                            | 0.0218  | 0.2953 |
| JW2880 | serA | D-3-phosphoglycerate dehydrogenase                                                                                 | 0.2727  | 0.0124 |
| JW2880 | serA | D-3-phosphoglycerate dehydrogenase                                                                                 | 0.4792  | 0.0008 |
| JW2882 | yqfE | pseudogene, LysR family                                                                                            | 0.0051  | 0.9216 |
| JW2883 | argP | transcriptional regulator for arginine<br>transport and DNA replication genes;<br>replication initiation inhibitor | -0.0009 | 0.9603 |
| JW2884 | yliK | methylmalonyl-CoA mutase                                                                                           | -0.0669 | 0.0803 |
| JW2885 | argK | membrane ATPase/protein kinase                                                                                     | 0.1142  | 0.0762 |
| JW2886 | ygfG | methylmalonyl-CoA decarboxylase, biotin-<br>independent                                                            | -0.0039 | 0.8566 |
| JW2887 | ygfH | propionyl-CoA:succinate CoA transferase                                                                            | -0.0039 | 0.8280 |
| JW2889 | yggE | oxidative stress defense protein                                                                                   | 0.2526  | 0.0275 |

|        |      |                                                                                                         |         |        |
|--------|------|---------------------------------------------------------------------------------------------------------|---------|--------|
| JW2890 | argO | arginine transporter                                                                                    | 0.0227  | 0.6035 |
| JW2891 | mscS | mechanosensitive channel protein, small conductance                                                     | 0.0045  | 0.9218 |
| JW2894 | epd  | D-erythrose 4-phosphate dehydrogenase                                                                   | 0.0241  | 0.4447 |
| JW2895 | yggC | putative PanK family P-loop kinase                                                                      | -0.0970 | 0.4822 |
| JW2896 | yggD | Fumarase E; MtlR family putative transcriptional repressor                                              | -0.1884 | 0.0362 |
| JW2897 | yggF | fructose 1,6 bisphosphatase isozyme                                                                     | -0.2135 | 0.0004 |
| JW2900 | cmtA | putative mannitol-specific PTS IIB and IIC components                                                   | 0.0146  | 0.2888 |
| JW2901 | cmtB | putative mannitol-specific enzyme IIA component of PTS                                                  | 0.0423  | 0.5284 |
| JW2903 | yggG | Phe-Phe periplasmic metalloprotease, OM lipoprotein; low salt-inducible; Era-binding heat shock protein | -0.0625 | 0.1726 |
| JW2904 | speB | agmatinase                                                                                              | 0.0135  | 0.6676 |
| JW2905 | speA | biosynthetic arginine decarboxylase, PLP-binding                                                        | 0.0034  | 0.9106 |
| JW2906 | yqgB | uncharacterized protein                                                                                 | -0.0526 | 0.0517 |
| JW2907 | yqgC | uncharacterized protein                                                                                 | 0.0352  | 0.2748 |
| JW2910 | galP | D-galactose transporter                                                                                 | -0.0024 | 0.9644 |
| JW2911 | sprT | Zn-dependent metalloprotease-related protein                                                            | -0.2664 | 0.0138 |
| JW2912 | endA | DNA-specific endonuclease I                                                                             | -0.0587 | 0.1127 |
| JW2913 | yggJ | 16S rRNA m(3)U1498 methyltransferase, SAM-dependent                                                     | -0.2497 | 0.0000 |
| JW2914 | gshB | glutathione synthetase                                                                                  | -0.2188 | 0.0002 |
| JW2915 | yqgE | uncharacterized protein                                                                                 | 0.0361  | 0.2199 |
| JW2917 | yggR | putative PilT family AAA+ ATPase                                                                        | 0.0343  | 0.2793 |
| JW2918 | yggS | UPF0001 family protein, PLP-binding                                                                     | -0.0894 | 0.0330 |
| JW2919 | yggT | putative inner membrane protein; compensates for loss in K <sup>+</sup> uptake                          | -0.0363 | 0.1986 |
| JW2921 | yggV | dITP/XTP pyrophosphatase                                                                                | 0.1566  | 0.1090 |
| JW2922 | yggW | HemN family putative oxidoreductase                                                                     | -0.0710 | 0.4749 |
| JW2923 | yggM | DUF1202 family putative secreted protein                                                                | 0.0084  | 0.7385 |
| JW2924 | ansB | periplasmic L-asparaginase 2                                                                            | -0.0767 | 0.0284 |
| JW2925 | yggN | DUF2884 family putative periplasmic protein                                                             | -0.0251 | 0.2821 |
| JW2926 | yggL | DUF469 family protein                                                                                   | 0.1013  | 0.3454 |
| JW2927 | yggH | tRNA m(7)G46 methyltransferase, SAM-dependent                                                           | 0.1198  | 0.0221 |
| JW2928 | mutY | adenine DNA glycosylase                                                                                 | 0.0685  | 0.0148 |
| JW2929 | yggX | oxidative damage protective factor for iron-sulfur proteins                                             | -0.4504 | 0.0025 |
| JW2932 | nupG | nucleoside transporter                                                                                  | -0.0462 | 0.5005 |
| JW2934 | yqgA | DUF554 family putative inner membrane protein                                                           | -0.1322 | 0.0299 |
| JW2935 | yghD | putative membrane-anchored secretion pathway M-type protein                                             | -0.1546 | 0.0010 |
| JW2938 | yghG | secretin (GspDbeta) OM localization lipoprotein pilotin                                                 | -0.0569 | 0.0097 |

|        |      |                                                                                                                               |         |        |
|--------|------|-------------------------------------------------------------------------------------------------------------------------------|---------|--------|
| JW2939 | pppA | bifunctional prepilin leader peptidase/<br>methylase                                                                          | 0.0784  | 0.0186 |
| JW2942 | yghK | glycolate transporter                                                                                                         | 0.2929  | 0.0001 |
| JW2943 | glcB | malate synthase G                                                                                                             | -0.1080 | 0.0346 |
| JW2944 | glcG | DUF336 family protein                                                                                                         | 0.0637  | 0.0142 |
| JW2946 | glcD | glycolate oxidase subunit, FAD-linked                                                                                         | -0.0912 | 0.0612 |
| JW2952 | yghR | putative ATP-binding protein                                                                                                  | 0.2218  | 0.0687 |
| JW2954 | yghT | putative ATP-binding protein                                                                                                  | -0.1636 | 0.0003 |
| JW2955 | pitB | phosphate transporter                                                                                                         | 0.0033  | 0.9200 |
| JW2956 | gss  | glutathionylspermidine amidase and<br>glutathionylspermidine synthetase                                                       | 0.1518  | 0.0112 |
| JW2958 | hybG | hydrogenase 2 accessory protein                                                                                               | -0.2732 | 0.0424 |
| JW2960 | hybE | hydrogenase 2-specific chaperone                                                                                              | 0.0983  | 0.0065 |
| JW2961 | hybD | maturation protease for hydrogenase 2                                                                                         | -0.2096 | 0.0135 |
| JW2962 | hybC | hydrogenase 2, large subunit                                                                                                  | 0.0134  | 0.5824 |
| JW2964 | hybA | hydrogenase 2 4Fe-4S ferredoxin-type<br>component                                                                             | 0.0037  | 0.8841 |
| JW2965 | hybO | hydrogenase 2, small subunit                                                                                                  | -0.1260 | 0.0113 |
| JW2966 | yghW | DUF2623 family protein                                                                                                        | 0.0641  | 0.2697 |
| JW2970 | yghZ | L-glyceraldehyde 3-phosphate reductase                                                                                        | -0.0278 | 0.6064 |
| JW2971 | yqhA | UPF0114 family putative inner membrane<br>protein                                                                             | -0.0358 | 0.7613 |
| JW2972 | yghA | putative oxidoreductase                                                                                                       | 0.0486  | 0.1670 |
| JW2973 | exbD | membrane spanning protein in TonB-ExbB-<br>ExbD complex                                                                       | 0.1366  | 0.0006 |
| JW2974 | exbB | membrane spanning protein in TonB-ExbB-<br>ExbD complex                                                                       | 0.2407  | 0.0000 |
| JW2975 | metC | cystathionine beta-lyase, PLP-dependent                                                                                       | -0.0643 | 0.5763 |
| JW2976 | yghB | general envelope maintenance protein;<br>DedA family inner membrane protein                                                   | -0.0512 | 0.0937 |
| JW2978 | yqhD | aldehyde reductase, NADPH-dependent                                                                                           | -0.0017 | 0.9485 |
| JW2982 | yqhH | outer membrane lipoprotein, Lpp paralog                                                                                       | 0.0346  | 0.0859 |
| JW2987 | parC | DNA topoisomerase IV, subunit A                                                                                               | -0.0009 | 0.9853 |
| JW2988 | ygiS | putative ABC transporter permease                                                                                             | 0.0017  | 0.9438 |
| JW2990 | ygiU | GCU-specific mRNA interferase toxin of the<br>MqsR-MqsA toxin-antitoxin system;<br>biofilm/motility regulator; anti-repressor | 0.0564  | 0.1646 |
| JW2992 | ygiW | hydrogen peroxide and cadmium resistance<br>periplasmic protein; stress-induced OB-fold<br>protein                            | 0.0225  | 0.5452 |
| JW2993 | qseB | quorum sensing DNA-binding response<br>regulator in two-component regulatory<br>system with QseC                              | -0.1000 | 0.0023 |
| JW2994 | qseC | quorum sensing sensory histidine kinase in<br>two-component regulatory system with<br>QseB                                    | -0.0205 | 0.1861 |
| JW2995 | ygiZ | inner membrane protein                                                                                                        | -0.7512 | 0.0000 |
| JW2996 | mdaB | NADPH quinone reductase                                                                                                       | -0.0093 | 0.8086 |
| JW2997 | ygiN | quinol monooxygenase                                                                                                          | -0.1015 | 0.0165 |

|        |      |                                                                                               |         |        |
|--------|------|-----------------------------------------------------------------------------------------------|---------|--------|
| JW2999 | yqiA | acyl CoA esterase                                                                             | -0.1920 | 0.0983 |
| JW3000 | cpdA | 3',5' cAMP phosphodiesterase                                                                  | 0.0032  | 0.9216 |
| JW3001 | yqiB | DUF1249 protein YqiB                                                                          | 0.0738  | 0.3012 |
| JW3002 | nudF | ADP-ribose pyrophosphatase                                                                    | -0.1753 | 0.0089 |
| JW3006 | ygiC | ATP-Grasp family ATPase                                                                       | 0.0094  | 0.7871 |
| JW3007 | zupT | 4,5- DOPA-extradiol-dioxygenase                                                               | -0.0697 | 0.0438 |
| JW3008 | ygiE | zinc transporter                                                                              | 0.0088  | 0.2995 |
| JW3011 | ygiL | putative fimbrial-like adhesin protein                                                        | -0.0040 | 0.8794 |
| JW3021 | glgS | motility and biofilm regulator                                                                | -0.0171 | 0.5699 |
| JW3022 | yqiJ | DUF1449 family inner membrane protein                                                         | -0.1502 | 0.0118 |
| JW3023 | yqiK | PHB family membrane protein, function unknown                                                 | 0.1009  | 0.0776 |
| JW3024 | rfaE | heptose 7-phosphate kinase and heptose 1-phosphate adenyltransferase fused                    | -0.0509 | 0.0119 |
| JW3025 | glnE | deadenyltransferase/adenyltransferase for glutamine synthetase                                | -0.0506 | 0.2991 |
| JW3026 | ygiF | inorganic triphosphatase                                                                      | -0.1030 | 0.0841 |
| JW3027 | htrG | SH3 domain protein                                                                            | 0.1496  | 0.0082 |
| JW3029 | bacA | undecaprenyl pyrophosphate phosphatase                                                        | -0.0247 | 0.4045 |
| JW3030 | folB | dihydroneopterin aldolase and dihydroneopterin triphosphate 2'-epimerase                      | 0.0144  | 0.7101 |
| JW3031 | ygiH | putative glycerol-3-phosphate acyltransferase                                                 | -0.0359 | 0.0881 |
| JW3032 | ygiP | transcriptional activator of ttdABT                                                           | 0.0182  | 0.6034 |
| JW3033 | ttdA | L-tartrate dehydratase, alpha subunit                                                         | -0.1129 | 0.0739 |
| JW3034 | ttdB | L-tartrate dehydratase, beta subunit                                                          | -0.0795 | 0.0017 |
| JW3035 | ygiE | L-tartrate/succinate antiporte                                                                | 0.0400  | 0.4045 |
| JW3037 | rpsU | 30S ribosomal subunit protein S21                                                             | 0.0289  | 0.3314 |
| JW3038 | dnaG | DNA primase                                                                                   | 0.0939  | 0.0001 |
| JW3039 | rpoD | RNA polymerase, sigma 70 (sigma D) factor                                                     | 0.1155  | 0.0002 |
| JW3040 | ygiF | G/U mismatch-specific DNA glycosylase; xanthine DNA glycosylase                               | -0.1928 | 0.0861 |
| JW3041 | yqiH | putative siderophore interacting protein                                                      | 0.0017  | 0.9618 |
| JW3042 | yqiI | PadR family putative transcriptional regulator                                                | -0.0829 | 0.2529 |
| JW3043 | aer  | fused signal transducer for aerotaxis sensory component/methyl accepting chemotaxis component | -0.0251 | 0.2264 |
| JW3045 | ygiH | putative tRNA binding protein; putative tRNA corner chaperone                                 | -0.0140 | 0.7679 |
| JW3048 | ebgC | evolved beta-D-galactosidase, beta subunit; cupin superfamily                                 | 0.0045  | 0.7778 |
| JW3050 | ygiJ | putative periplasmic protein                                                                  | -0.0342 | 0.4058 |

|        |      |                                                                          |         |        |
|--------|------|--------------------------------------------------------------------------|---------|--------|
| JW3051 | ygiK | alpha-glucosidase                                                        | 0.0339  | 0.5604 |
| JW3052 | fadH | 2,4-dienoyl-CoA reductase, NADH and FMN-linked                           | 0.0176  | 0.6414 |
| JW3053 | ygiM | antitoxin of the HigB-HigA toxin-antitoxin system                        | -0.0529 | 0.1355 |
| JW3054 | ygiN | mRNA interferase toxin of the HigB-HigA toxin-antitoxin system           | -0.2247 | 0.0179 |
| JW3057 | ygiQ | DUF218 superfamily protein                                               | -0.0711 | 0.4994 |
| JW3058 | ygiR | putative NAD(P)-dependent dehydrogenase                                  | 0.0048  | 0.7455 |
| JW3061 | ygiV | Imp-YgiV family inner membrane protein                                   | 0.0093  | 0.8132 |
| JW3062 | uxaA | altronate hydrolase                                                      | -0.0900 | 0.0009 |
| JW3063 | uxaC | uronate isomerase                                                        | -0.0051 | 0.8832 |
| JW3064 | exuT | hexuronate transporter                                                   | -0.0811 | 0.0506 |
| JW3065 | exuR | hexuronate regulon transcriptional repressor; autorepressor              | -0.2045 | 0.0002 |
| JW3066 | yqjA | general envelope maintenance protein; DedA family inner membrane protein | -0.2655 | 0.0245 |
| JW3069 | yqjD | membrane-anchored ribosome-binding protein                               | -0.0256 | 0.3730 |
| JW3070 | yqjE | DUF1469 family inner membrane protein                                    | -0.0307 | 0.3392 |
| JW3071 | yqjK | uncharacterized protein                                                  | -0.1003 | 0.0005 |
| JW3073 | yqjG | putative S-transferase                                                   | -0.0344 | 0.4732 |
| JW3074 | yhaH | DUF805 family inner membrane protein,                                    | -0.3772 | 0.0006 |
| JW3075 | yhaI | DUF805 family inner membrane protein                                     | -0.1364 | 0.0000 |
| JW3076 | yhaJ | transcription regulator of quinol-like compound degradation              | 0.0433  | 0.1514 |
| JW3077 | yhaK | dinitrotoluene degradation protein, redox-sensitive bicupin              | -0.0353 | 0.1058 |
| JW3087 | tdcC | L-threonine/L-serine transporter                                         | -0.2734 | 0.0111 |
| JW3088 | tdcB | L-threonine dehydratase, catabolic                                       | -0.0811 | 0.0117 |
| JW3089 | tdcA | tdc operon transcriptional activator                                     | 0.0262  | 0.2407 |
| JW3091 | yhaB | uncharacterized protein                                                  | 0.1017  | 0.0014 |
| JW3092 | yhaC | pentapeptide repeats-related protein                                     | -0.1019 | 0.0129 |
| JW3093 | garK | glycerate kinase I                                                       | -0.0739 | 0.0021 |
| JW3095 | garL | alpha-dehydro-beta-deoxy-D-glucarate aldolase                            | -0.0744 | 0.1067 |
| JW3096 | garP | putative (D)-galactarate transporter                                     | 0.0392  | 0.1571 |
| JW3097 | garD | D-galactarate dehydrogenase                                              | -0.2433 | 0.0303 |
| JW3098 | sohA | antitoxin of the SohA(PrIF)-YhaV toxin-antitoxin system                  | 0.0964  | 0.1212 |
| JW3099 | yhaV | toxin of the SohB(PrIF)-YhaV toxin-antitoxin system                      | -0.0282 | 0.5692 |
| JW3100 | agaR | transcriptional repressor of the aga regulon                             | -0.0492 | 0.4235 |
| JW3101 | kbaZ | tagatose 6-phosphate aldolase 1, kbaZ subunit                            | -0.0315 | 0.3916 |
| JW3102 | agaV | N-acetylgalactosamine-specific enzyme IIB component of PTS               | -0.0002 | 0.9948 |

|        |      |                                                                                                               |         |        |
|--------|------|---------------------------------------------------------------------------------------------------------------|---------|--------|
| JW3103 | agaW | pseudogene, N-acetylgalactosamine-specific enzyme IIC component of PTS                                        | -0.0763 | 0.0651 |
| JW3105 | agaS | tagatose-6-phosphate ketose/aldose isomerase                                                                  | -0.1153 | 0.0079 |
| JW3106 | kbaY | tagatose 6-phosphate aldolase 1, kbaY subunit                                                                 | 0.0947  | 0.0405 |
| JW3107 | agaB | N-acetylgalactosamine-specific enzyme IIB component of PTS                                                    | 0.0592  | 0.3768 |
| JW3108 | agaC | N-acetylgalactosamine-specific enzyme IIC component of PTS                                                    | 0.0513  | 0.2955 |
| JW3109 | agaD | N-acetylgalactosamine-specific enzyme IID component of PTS                                                    | 0.2256  | 0.0036 |
| JW3110 | agaI | galactosamine-6-phosphate isomerase                                                                           | 0.0064  | 0.8384 |
| JW3111 | yraH | putative fimbrial-like adhesin protein                                                                        | -0.1487 | 0.3013 |
| JW3112 | yraI | putative periplasmic pilin chaperone                                                                          | 0.0645  | 0.0652 |
| JW3113 | yraJ | putative outer membrane protein                                                                               | -0.0285 | 0.2948 |
| JW3114 | yraK | putative fimbrial-like adhesin protein                                                                        | 0.1548  | 0.0086 |
| JW3116 | yraM | OM lipoprotein stimulator of MrcA transpeptidase                                                              | 0.0005  | 0.9875 |
| JW3117 | yraN | UPF0102 family protein                                                                                        | -0.0174 | 0.6872 |
| JW3118 | yraO | DnaA initiator-associating factor for replication initiation                                                  | -0.0504 | 0.2301 |
| JW3119 | yraP | outer membrane lipoprotein                                                                                    | -0.1796 | 0.0049 |
| JW3120 | yraQ | putative inner membrane permease                                                                              | 0.0858  | 0.2823 |
| JW3123 | yhbP | UPF0306 family protein                                                                                        | -0.0127 | 0.8312 |
| JW3124 | yhbQ | GIY-YIG nuclease superfamily protein                                                                          | -0.0437 | 0.3429 |
| JW3125 | yhbS | GNAT family putative N-acetyltransferase                                                                      | 0.1106  | 0.0169 |
| JW3127 | yhbU | U32 peptidase family protein                                                                                  | -0.0550 | 0.1460 |
| JW3129 | yhbW | putative luciferase-like monooxygenase                                                                        | 0.1583  | 0.0401 |
| JW3130 | mtr  | tryptophan transporter of high affinity                                                                       | 0.0148  | 0.6290 |
| JW3132 | nlpI | lipoprotein involved in osmotic sensitivity and filamentation                                                 | -0.0275 | 0.2595 |
| JW3134 | rpsO | 30S ribosomal subunit protein S15                                                                             | -0.0178 | 0.3755 |
| JW3135 | truB | tRNA pseudouridine synthase B: tRNA pseudouridine(55) synthase and putative tmRNA pseudouridine(342) synthase | -0.0902 | 0.0016 |
| JW3136 | rbfA | 30s ribosome binding factor                                                                                   | -0.2261 | 0.0885 |
| JW3140 | argG | argininosuccinate synthetase                                                                                  | 0.1090  | 0.0064 |
| JW3142 | secG | preprotein translocase membrane subunit                                                                       | 0.0540  | 0.2520 |
| JW3143 | glmM | phosphoglucosamine mutase                                                                                     | 0.0383  | 0.4195 |
| JW3144 | folP | 7,8-dihydropteroate synthase                                                                                  | 0.1940  | 0.0594 |
| JW3146 | rrmJ | 23S rRNA U2552 2'-O-ribose methyltransferase, SAM-dependent                                                   | 0.0963  | 0.0398 |
| JW3147 | yhbY | RNA binding protein associated with pre-50S ribosomal subunits                                                | 0.0124  | 0.7636 |



|        |      |                                                                                                  |         |        |
|--------|------|--------------------------------------------------------------------------------------------------|---------|--------|
| JW3148 | greA | transcript cleavage factor                                                                       | 0.0719  | 0.0993 |
| JW3149 | dacB | D-alanyl-D-alanine carboxypeptidase                                                              | -0.0921 | 0.0647 |
| JW3151 | yhbE | EamA family inner membrane putative transporter                                                  | -0.0500 | 0.0250 |
| JW3155 | sisB | malPQ operon transcriptional activator                                                           | 0.0580  | 0.0117 |
| JW3157 | yrbA | acid stress protein; putative BolA family transcriptional regulator                              | -0.0527 | 0.2900 |
| JW3159 | yrbC | ABC transporter maintaining OM lipid asymmetry, periplasmic binding protein                      | -0.0842 | 0.0450 |
| JW3160 | yrbD | OM lipid asymmetry maintenance protein; membrane-anchored ABC family periplasmic binding protein | -0.0210 | 0.5288 |
| JW3161 | yrbE | ABC transporter maintaining OM lipid asymmetry, inner membrane permease protein                  | -0.0271 | 0.2238 |
| JW3162 | yrbF | ABC transporter maintaining OM lipid asymmetry, ATP-binding protein                              | -0.0070 | 0.8133 |
| JW3163 | yrbG | putative calcium/sodium:proton antiporter                                                        | 0.0409  | 0.2933 |
| JW3164 | kdsD | D-arabinose 5-phosphate isomerase                                                                | -0.1797 | 0.0087 |
| JW3165 | kdsC | 3-deoxy-D-manno-octulosonate 8-phosphate phosphatase                                             | -0.0222 | 0.6081 |
| JW3168 | yhbG | lipopolysaccharide export ABC transporter ATPase                                                 | 0.1559  | 0.0002 |
| JW3169 | rpoN | RNA polymerase, sigma 54 (sigma N) factor                                                        | 0.0355  | 0.0017 |
| JW3170 | yhbH | ribosome hibernation promoting factor HPF; stabilizes 100S dimers                                | 0.0567  | 0.2232 |
| JW3171 | ptsN | sugar-specific enzyme IIA component of PTS                                                       | 0.0675  | 0.1369 |
| JW3172 | yhbJ | adaptor protein for GlmZ/GlmY sRNA decay, glucosamine-6-phosphate-regulated; NTPase              | 0.0287  | 0.5445 |
| JW3173 | npr  | phosphohistidinoprotein-hexose phosphotransferase component of N-regulated PTS system (Npr)      | -0.0304 | 0.6682 |
| JW3174 | yrbL | Mg(2+)-starvation-stimulated protein                                                             | 0.0629  | 0.0300 |
| JW3175 | mtgA | biosynthetic peptidoglycan transglycosylase                                                      | 0.0688  | 0.2245 |
| JW3176 | elbB | isoprenoid biosynthesis protein with amidotransferase-like domain                                | 0.0183  | 0.2726 |
| JW3178 | yhcC | putative Fe-S oxidoreductase, Radical SAM superfamily protein                                    | -0.0584 | 0.0386 |
| JW3179 | gltB | glutamate synthase, large subunit                                                                | -0.0269 | 0.1665 |
| JW3180 | gltD | glutamate synthase, 4Fe-4S protein, small subunit                                                | 0.0072  | 0.7297 |
| JW3181 | gltF | periplasmic protein                                                                              | -0.0106 | 0.6636 |
| JW3182 | yhcA | putative periplasmic chaperone protein                                                           | 0.0242  | 0.2657 |

|        |      |                                                                                                                                                   |         |        |
|--------|------|---------------------------------------------------------------------------------------------------------------------------------------------------|---------|--------|
| JW3183 | yhcD | putative outer membrane fimbrial subunit usher protein                                                                                            | -0.0242 | 0.5375 |
| JW3184 | yhcE | UPF0056 membrane protein                                                                                                                          | 0.0323  | 0.0715 |
| JW3188 | yhcF | putative transcriptional regulator                                                                                                                | -0.0339 | 0.0262 |
| JW3189 | yhcG | DUF1016 family protein in the PD-(D/E)XK nuclease superfamily                                                                                     | -0.0319 | 0.2749 |
| JW3190 | yhcH | DUF386 family protein, cupin superfamily                                                                                                          | 0.0222  | 0.5333 |
| JW3192 | nanE | putative N-acetylmannosamine-6-P epimerase                                                                                                        | 0.0155  | 0.4514 |
| JW3193 | nanT | sialic acid transporter                                                                                                                           | 0.1297  | 0.0005 |
| JW3194 | nanA | N-acetylneuraminate lyase                                                                                                                         | 0.0121  | 0.8509 |
| JW3195 | nanR | sialic acid-inducible nan operon repressor                                                                                                        | 0.0134  | 0.6477 |
| JW3196 | dcuD | putative transporter                                                                                                                              | -0.0173 | 0.6919 |
| JW3197 | sspB | ClpXP protease specificity enhancing factor                                                                                                       | 0.0261  | 0.3716 |
| JW3198 | sspA | stringent starvation protein A, phage P1 late gene activator, RNAP-associated acid-resistance protein, inactive glutathione S-transferase homolog | -0.2712 | 0.0004 |
| JW3201 | yhcM | divisome ATPase                                                                                                                                   | 0.0580  | 0.1727 |
| JW3203 | degQ | serine endoprotease, periplasmic                                                                                                                  | -0.0569 | 0.2403 |
| JW3205 | mdh  | malate dehydrogenase, NAD(P)-binding                                                                                                              | 0.1533  | 0.0167 |
| JW3206 | argR | l-arginine-responsive arginine metabolism regulon transcriptional regulator                                                                       | -0.0462 | 0.0131 |
| JW3208 | yhcO | putative barnase inhibitor                                                                                                                        | 0.1650  | 0.0751 |
| JW3209 | aaeB | p-hydroxybenzoic acid efflux system component                                                                                                     | 0.0697  | 0.0007 |
| JW3210 | aaeA | p-hydroxybenzoic acid efflux system component                                                                                                     | -0.0498 | 0.1569 |
| JW3212 | aaeR | transcriptional regulator for aaeXAB operon                                                                                                       | 0.0476  | 0.1161 |
| JW3213 | tldD | putative peptidase                                                                                                                                | 0.1036  | 0.1773 |
| JW3216 | rng  | ribonuclease G                                                                                                                                    | 0.0571  | 0.0118 |
| JW3217 | yhdE | dTTP/UTP pyrophosphatase; m(5)UTP/m(5)CTP/pseudo-UTP pyrophosphatase                                                                              | -0.0658 | 0.0034 |
| JW3221 | yhdA | targeting factor for csrBC sRNA degradation                                                                                                       | 0.1065  | 0.0000 |
| JW3222 | yhdH | putative acryloyl-CoA reductase                                                                                                                   | -0.0315 | 0.2297 |
| JW3225 | yhdT | DUF997 family putative inner membrane protein                                                                                                     | 0.0803  | 0.0001 |
| JW3226 | panF | pantothenate:sodium symporter                                                                                                                     | -0.0220 | 0.7277 |
| JW3227 | prmA | methyltransferase for 50S ribosomal subunit protein L11                                                                                           | -0.0167 | 0.5922 |
| JW3228 | dusB | tRNA-dihydrouridine synthase B                                                                                                                    | -0.0153 | 0.7669 |
| JW3229 | fis  | global DNA-binding transcriptional dual regulator                                                                                                 | -0.1567 | 0.0050 |

|        |      |                                                                |         |        |
|--------|------|----------------------------------------------------------------|---------|--------|
| JW3231 | yhdU | putative membrane protein                                      | 0.0718  | 0.1066 |
| JW3232 | envR | acrAB operon transcriptional repressor                         | -0.0445 | 0.0762 |
| JW3233 | acrE | cytoplasmic membrane lipoprotein                               | -0.0265 | 0.0605 |
| JW3234 | acrF | multidrug efflux system protein                                | -0.1021 | 0.0002 |
| JW3235 | yhdV | putative outer membrane protein                                | 0.1159  | 0.0005 |
| JW3236 | yhdW | pseudogene, ABC transporter periplasmic binding protein family | -0.0552 | 0.0215 |
| JW3239 | yhdZ | putative amino acid ABC transporter ATPase                     | -0.0091 | 0.7570 |
| JW3241 | yrdB | DUF1488 family protein                                         | -0.0395 | 0.0560 |
| JW3242 | aroE | dehydroshikimate reductase, NAD(P)-binding                     | 0.0049  | 0.9181 |
| JW3245 | smg  | DUF494 family putative periplasmic protein                     | -0.0636 | 0.0184 |
| JW3250 | rsmB | 16S rRNA m(5)C967 methyltransferase, SAM-dependent             | 0.0541  | 0.0635 |
| JW3251 | trkA | NAD-binding component of TrK potassium transporter             | -0.1316 | 0.0151 |
| JW3252 | mscL | mechanosensitive channel protein, high conductance             | 0.0105  | 0.6998 |
| JW3253 | yhdL | alternate ribosome-rescue factor A                             | -0.2504 | 0.0234 |
| JW3254 | zntR | zntA gene transcriptional activator                            | -0.0120 | 0.5544 |
| JW3255 | yhdN | DUF1992 family protein                                         | -0.0141 | 0.7519 |
| JW3261 | rpmJ | 50S ribosomal subunit protein L36                              | 0.0288  | 0.2604 |
| JW3284 | pioO | part of gsp divergon involved in type II protein secretion     | -0.1055 | 0.0175 |
| JW3285 | gspA | general secretory pathway component, cryptic                   | -0.0073 | 0.7745 |
| JW3286 | gspC | general secretory pathway component, cryptic                   | -0.0613 | 0.0907 |
| JW3288 | gspE | general secretory pathway component, cryptic                   | 0.0918  | 0.1256 |
| JW3289 | gspF | general secretory pathway component, cryptic                   | 0.0543  | 0.0210 |
| JW3290 | gspG | pseudopilin, cryptic, general secretion pathway                | -0.0499 | 0.4155 |
| JW3291 | gspH | putative general secretory pathway component, cryptic          | -0.0660 | 0.0754 |
| JW3293 | gspJ | putative general secretory pathway component, cryptic          | 0.1456  | 0.0177 |
| JW3294 | gspK | general secretory pathway component, cryptic                   | -0.0354 | 0.1375 |
| JW3297 | gspO | bifunctional prepilin leader peptidase/methylase               | 0.2365  | 0.0283 |
| JW3298 | bfr  | bacterioferritin, iron storage and detoxification protein      | -0.0737 | 0.0918 |
| JW3299 | bfd  | bacterioferritin-associated ferredoxin                         | -0.3630 | 0.0134 |
| JW3300 | chiA | periplasmic endochitinase                                      | -0.0320 | 0.4756 |
| JW3301 | tufA | translation elongation factor EF-Tu 1                          | 0.0820  | 0.0091 |
| JW3305 | yheL | mnm(5)-s(2)U34-tRNA synthesis 2-thiolation protein             | -0.0161 | 0.7259 |

|        |      |                                                                                                                                       |         |        |
|--------|------|---------------------------------------------------------------------------------------------------------------------------------------|---------|--------|
| JW3306 | yheM | mnm(5)-s(2)U34-tRNA synthesis 2-thiolation protein                                                                                    | -0.0011 | 0.9733 |
| JW3307 | yheN | sulfurtransferase for 2-thiolation step of mnm(5)-s(2)U34-tRNA synthesis                                                              | -0.1557 | 0.2285 |
| JW3309 | fkpA | FKBP-type peptidyl-prolyl cis-trans isomerase (rotamase)                                                                              | -0.0040 | 0.9298 |
| JW3310 | slyX | phi X174 lysis protein                                                                                                                | -0.0751 | 0.2198 |
| JW3311 | slyD | FKBP-type peptidyl prolyl cis-trans isomerase (rotamase)                                                                              | -0.0323 | 0.4411 |
| JW3312 | yheV | DUF2387 family putative metal-binding protein                                                                                         | -0.1311 | 0.0196 |
| JW3313 | kefB | potassium:proton antiporter                                                                                                           | -0.0473 | 0.2567 |
| JW3314 | kefG | potassium-efflux system ancillary protein for KefB, glutathione-regulated                                                             | -0.0964 | 0.0008 |
| JW3315 | yheS | ABC-F family protein predicted regulatory ATPase                                                                                      | 0.0309  | 0.2323 |
| JW3316 | yheT | UPF0017 family putative hydrolase                                                                                                     | -0.0329 | 0.5264 |
| JW3317 | yheU | UPF0270 family protein                                                                                                                | 0.0010  | 0.9710 |
| JW3318 | prkB | putative phosphoribulokinase                                                                                                          | -0.0390 | 0.1254 |
| JW3319 | yhfA | OsmC family protein                                                                                                                   | 0.0472  | 0.0160 |
| JW3322 | argD | bifunctional acetylmornithine aminotransferase and succinyldiaminopimelate aminotransferase                                           | -0.0207 | 0.5237 |
| JW3323 | pabA | aminodeoxychorismate synthase, subunit II                                                                                             | -0.0818 | 0.0001 |
| JW3324 | fic  | stationary phase-induced protein, putative toxin                                                                                      | 0.0441  | 0.0948 |
| JW3325 | yhfG | putative antitoxin for Fic                                                                                                            | -0.0303 | 0.3804 |
| JW3326 | ppiA | peptidyl-prolyl cis-trans isomerase A (rotamase A)                                                                                    | -0.0597 | 0.0251 |
| JW3327 | tsgA | putative transporter                                                                                                                  | 0.0756  | 0.1295 |
| JW3328 | nirB | nitrite reductase, large subunit, NAD(P)H-binding                                                                                     | -0.0875 | 0.0858 |
| JW3329 | nirD | nitrite reductase (NADH) small subunit                                                                                                | 0.0926  | 0.0393 |
| JW3330 | nirC | nitrite transporter                                                                                                                   | 0.0864  | 0.0378 |
| JW3331 | cysG | fused siroheme synthase 1,3-dimethyluroporphyriongen III dehydrogenase and siroheme ferrochelatase/uroporphyrinogen methyltransferase | -0.0195 | 0.4187 |
| JW3332 | yhfL | small lipoprotein                                                                                                                     | -0.0170 | 0.7325 |
| JW3333 | frlA | putative fructoselysine transporter                                                                                                   | 0.0902  | 0.0003 |
| JW3337 | frlD | fructoselysine 6-kinase                                                                                                               | -0.0119 | 0.6213 |
| JW3339 | yhfS | FNR-regulated pyridoxal phosphate-dependent aminotransferase family protein                                                           | 0.0634  | 0.0556 |
| JW3340 | yhfT | inner membrane protein                                                                                                                | -0.0572 | 0.4518 |
| JW3342 | php  | phosphotriesterase homology protein                                                                                                   | -0.0078 | 0.8993 |

|        |      |                                                                                                                       |         |        |
|--------|------|-----------------------------------------------------------------------------------------------------------------------|---------|--------|
| JW3343 | yhfW | phosphopentomutase-related metalloenzyme superfamily protein                                                          | 0.0431  | 0.0795 |
| JW3344 | yhfX | putative pyridoxal 5'-phosphate binding protein                                                                       | 0.0027  | 0.8759 |
| JW3348 | gph  | phosphoglycolate phosphatase                                                                                          | 0.0178  | 0.4983 |
| JW3349 | rpe  | D-ribulose-5-phosphate 3-epimerase                                                                                    | -0.0382 | 0.5901 |
| JW3350 | dam  | DNA adenine methyltransferase                                                                                         | 0.2377  | 0.0000 |
| JW3351 | damX | cell division protein that binds to the septal ring                                                                   | 0.1784  | 0.0000 |
| JW3352 | aroB | 3-dehydroquinate synthase                                                                                             | -0.0080 | 0.8193 |
| JW3354 | hofQ | DNA catabolic putative fimbrial transporter                                                                           | -0.0297 | 0.1910 |
| JW3356 | yrfB | DNA catabolic protein                                                                                                 | 0.0066  | 0.8395 |
| JW3357 | yrfC | DNA catabolic putative fimbrial assembly protein                                                                      | 0.0243  | 0.2980 |
| JW3359 | mrcA | penicillin-binding protein 1a, murein transglycosylase and transpeptidase                                             | -0.0539 | 0.1493 |
| JW3360 | nudE | adenosine nucleotide hydrolase; Ap3A/Ap2A/ADP-ribose/NADH hydrolase                                                   | -0.0253 | 0.3060 |
| JW3363 | hslR | ribosome-associated heat shock protein Hsp15                                                                          | -0.0547 | 0.0068 |
| JW3365 | yhgE | DUF4153 family putative inner membrane protein                                                                        | 0.2028  | 0.0739 |
| JW3366 | pck  | phosphoenolpyruvate carboxykinase [ATP]                                                                               | -0.0516 | 0.0631 |
| JW3367 | envZ | sensory histidine kinase in two-component regulatory system with OmpR                                                 | 0.1520  | 0.0004 |
| JW3368 | ompR | response regulator in two-component regulatory system with EnvZ                                                       | -0.0032 | 0.8792 |
| JW3369 | greB | transcript cleavage factor                                                                                            | -0.1410 | 0.0000 |
| JW3370 | yhgF | putative transcriptional accessory factor; ionizing radiation survival protein; putative nucleic acid-binding protein | -0.0367 | 0.3271 |
| JW3371 | feoA | ferrous iron transporter, protein A                                                                                   | 0.0050  | 0.8936 |
| JW3372 | feoB | ferrous iron transporter protein B and GTP-binding protein; membrane protein                                          | -0.1543 | 0.0000 |
| JW3373 | yhgG | putative DNA-binding transcriptional regulator                                                                        | -0.0378 | 0.0343 |
| JW3374 | yhgA | transposase_31 family protein                                                                                         | 0.0051  | 0.9243 |
| JW3375 | bioH | pimeloyl-ACP methyl ester carboxylesterase                                                                            | 0.0964  | 0.0026 |
| JW3377 | gntY | Fe/S biogenesis protein, scaffold/chaperone protein                                                                   | 0.0584  | 0.0158 |
| JW3379 | malQ | 4-alpha-glucanotransferase (amylomaltase)                                                                             | -0.0138 | 0.2841 |
| JW3381 | malT | mal regulon transcriptional activator                                                                                 | 0.0064  | 0.6555 |
| JW3384 | rtcB | RNA-splicing ligase                                                                                                   | 0.0205  | 0.6653 |
| JW3385 | rtcR | sigma 54-dependent transcriptional regulator of rtcBA expression                                                      | 0.0228  | 0.1435 |
| JW3386 | glpR | pseudogene, DNA-binding transcriptional repressor                                                                     | -0.0421 | 0.0411 |

|        |      |                                                                                             |         |        |
|--------|------|---------------------------------------------------------------------------------------------|---------|--------|
| JW3388 | glpE | thiosulfate:cyanide sulfurtransferase (rhodanese)                                           | 0.0238  | 0.1450 |
| JW3389 | glpD | sn-glycerol-3-phosphate dehydrogenase, aerobic, FAD/NAD(P)-binding                          | 0.0258  | 0.3468 |
| JW3390 | yzgL | pseudogene, periplasmic solute binding protein homology                                     | 0.3086  | 0.0165 |
| JW3391 | glgP | glycogen phosphorylase                                                                      | -0.0362 | 0.1943 |
| JW3392 | glgA | glycogen synthase                                                                           | 0.0919  | 0.0057 |
| JW3393 | glgC | glucose-1-phosphate adenylyltransferase                                                     | 0.0194  | 0.3506 |
| JW3394 | glgX | glycogen debranching enzyme                                                                 | 0.0081  | 0.4916 |
| JW3395 | glgB | 1,4-alpha-glucan branching enzyme                                                           | -0.0730 | 0.2782 |
| JW3397 | yhgN | UPF0056 family inner membrane protein                                                       | -0.0496 | 0.0294 |
| JW3400 | gntK | gluconate kinase 2                                                                          | 0.0187  | 0.2827 |
| JW3402 | yhkW | quercetinase activity in vitro                                                              | -0.0294 | 0.0165 |
| JW3403 | yhX  | putative oxidoreductase                                                                     | -0.0208 | 0.0886 |
| JW3405 | yhY  | L-amino acid N-acetyltransferase; aminoacyl nucleotide detoxifying acetyltransferase        | 0.0081  | 0.7196 |
| JW3406 | yhZ  | putative Hcp1 family polymorphic toxin protein; putative colicin-like DNase/tRNase activity | 0.0032  | 0.9526 |
| JW3411 | yrhB | stable heat shock chaperone                                                                 | 0.1659  | 0.0088 |
| JW3412 | ggt  | gamma-glutamyltranspeptidase                                                                | 0.1500  | 0.0072 |
| JW3413 | yhA  | DUF2756 family protein                                                                      | -0.3402 | 0.0568 |
| JW3414 | ugpQ | glycerophosphodiester phosphodiesterase, cytosolic                                          | -0.0085 | 0.7310 |
| JW3415 | ugpC | sn-glycerol-3-phosphate ABC transporter ATPase                                              | 0.1518  | 0.2018 |
| JW3416 | ugpE | sn-glycerol-3-phosphate ABC transporter permease                                            | -0.0238 | 0.4020 |
| JW3417 | ugpA | sn-glycerol-3-phosphate ABC transporter permease                                            | -0.0792 | 0.0007 |
| JW3419 | livF | branched-chain amino acid ABC transporter ATPase                                            | -0.1603 | 0.1260 |
| JW3420 | livG | branched-chain amino acid ABC transporter ATPase                                            | -0.0278 | 0.3042 |
| JW3421 | livM | branched-chain amino acid ABC transporter permease                                          | 0.0462  | 0.1024 |
| JW3422 | livH | branched-chain amino acid ABC transporter permease                                          | 0.0002  | 0.9949 |
| JW3423 | livK | leucine transporter subunit                                                                 | 0.0056  | 0.9496 |
| JW3424 | yhK  | PanD autocleavage accelerator, pantothenate synthesis                                       | 0.0169  | 0.7644 |
| JW3425 | livJ | branched-chain amino acid ABC transporter periplasmic binding protein                       | -0.0347 | 0.1344 |
| JW3432 | yhM  | DUF2500 family protein                                                                      | -0.0193 | 0.5477 |
| JW3433 | yhN  | TMEM86 family putative inner membrane protein                                               | -0.0048 | 0.7415 |
| JW3434 | zntA | zinc, cobalt and lead efflux system                                                         | 0.0294  | 0.5033 |
| JW3435 | yhP  | mnm(5)-s(2)U34-tRNA 2-thiolation sulfurtransferase                                          | -0.0760 | 0.0412 |

|        |      |                                                                      |         |        |
|--------|------|----------------------------------------------------------------------|---------|--------|
| JW3440 | acpT | 4'-phosphopantetheinyl transferase                                   | 0.0648  | 0.0180 |
| JW3441 | nikA | nickel/heme ABC transporter periplasmic binding protein              | 0.0440  | 0.4743 |
| JW3442 | nikB | nickel ABC transporter permease                                      | 0.0324  | 0.3716 |
| JW3443 | nikC | nickel ABC transporter permease                                      | 0.1073  | 0.0049 |
| JW3444 | nikD | nickel ABC transporter ATPase                                        | -0.0776 | 0.0000 |
| JW3445 | nikE | nickel ABC transporter ATPase                                        | 0.1268  | 0.0056 |
| JW3446 | nikR | transcriptional repressor, Ni-binding                                | 0.0466  | 0.0355 |
| JW3449 | yhhH | putative NTF2 fold immunity protein for polymorphic toxin RhsB       | -0.0594 | 0.0076 |
| JW3451 | yhhI | putative transposase                                                 | -0.0401 | 0.1377 |
| JW3454 | yhiI | putative membrane fusion protein (MFP) of efflux pump                | 0.0341  | 0.1155 |
| JW3455 | yhiJ | DUF4049 family protein                                               | -0.0126 | 0.7193 |
| JW3457 | yhiL | Putative uncharacterized protein                                     | 0.0631  | 0.2953 |
| JW3459 | yhiN | putative oxidoreductase                                              | -0.0106 | 0.7872 |
| JW3460 | pitA | phosphate transporter, low-affinity; tellurite importer              | 0.0908  | 0.0064 |
| JW3461 | yhiO | universal stress (ethanol tolerance) protein B                       | -0.1400 | 0.0677 |
| JW3462 | uspA | universal stress global response regulator                           | -0.0417 | 0.3129 |
| JW3463 | yhiP | dipeptide and tripeptide permease B                                  | -0.3839 | 0.0137 |
| JW3465 | prlC | oligopeptidase A                                                     | -0.0361 | 0.5068 |
| JW3466 | yhiR | 23S rRNA m(6)A2030 methyltransferase, SAM-dependent                  | 0.0226  | 0.3623 |
| JW3467 | gor  | glutathione oxidoreductase                                           | 0.0501  | 0.0013 |
| JW3468 | arsR | arsenical resistance operon transcriptional repressor; autorepressor | -0.0105 | 0.8502 |
| JW3469 | arsB | arsenite/antimonite transporter                                      | 0.0840  | 0.0052 |
| JW3470 | arsC | arsenate reductase                                                   | -0.2181 | 0.1456 |
| JW3471 | yhiS | pseudogene                                                           | 0.0279  | 0.3511 |
| JW3474 | slp  | outer membrane lipoprotein                                           | -0.0127 | 0.5162 |
| JW3475 | yhiF | Putative LuxR family repressor for dicarboxylate transport           | -0.0522 | 0.3517 |
| JW3478 | hdeA | stress response protein acid-resistance protein                      | 0.1407  | 0.0004 |
| JW3479 | hdeD | acid-resistance membrane protein                                     | 0.0160  | 0.3589 |
| JW3480 | gadE | gad regulon transcriptional activator                                | 0.1689  | 0.0039 |
| JW3481 | mdtE | anaerobic multidrug efflux transporter, ArcA-regulated               | 0.0789  | 0.0175 |
| JW3482 | mdtF | anaerobic multidrug efflux transporter, ArcA-regulated               | 0.0809  | 0.0002 |
| JW3483 | gadW | transcriptional activator of gadA and gadBC; repressor of gadX       | -0.1016 | 0.3064 |
| JW3484 | gadX | acid resistance regulon transcriptional activator; autoactivator     | 0.0035  | 0.8822 |
| JW3485 | gadA | glutamate decarboxylase A, PLP-dependent                             | 0.1795  | 0.0080 |
| JW3486 | yhjA | cytochrome c peroxidase                                              | -0.0780 | 0.2853 |
| JW3487 | treF | cytoplasmic trehalase                                                | 0.0299  | 0.1809 |

|        |      |                                                                                           |         |        |
|--------|------|-------------------------------------------------------------------------------------------|---------|--------|
| JW3488 | yhjB | putative DNA-binding transcriptional response regulator                                   | 0.4025  | 0.0073 |
| JW3489 | yhjC | LysR family putative transcriptional regulator                                            | 0.1498  | 0.0001 |
| JW3490 | yhjD | inner membrane putative BrbK family alternate lipid exporter                              | -0.2518 | 0.0001 |
| JW3491 | yhjE | putative MFS transporter; membrane protein                                                | 0.0034  | 0.8883 |
| JW3492 | yhjG | putative inner membrane-anchored periplasmic AsmA family protein                          | 0.0391  | 0.0993 |
| JW3493 | yhjH | cyclic-di-GMP phosphodiesterase, FlhDC-regulated                                          | -0.0607 | 0.0466 |
| JW3495 | yhjJ | putative periplasmic M16 family chaperone                                                 | -0.0326 | 0.5492 |
| JW3496 | dctA | C4-dicarboxylic acid, orotate and citrate transporter                                     | 0.0950  | 0.0008 |
| JW3499 | bcsZ | endo-1,4-D-glucanase                                                                      | -0.0977 | 0.0172 |
| JW3503 | yhjR | DUF2629 family protein                                                                    | 0.0027  | 0.9300 |
| JW3504 | bcsE | cellulose production protein                                                              | -0.0368 | 0.1930 |
| JW3506 | bcsG | DUF3260 family cellulose production inner membrane protein                                | 0.0306  | 0.1059 |
| JW3508 | yhjV | putative transporter                                                                      | 0.0643  | 0.1556 |
| JW3509 | dppF | dipeptide/heme ABC transporter ATPas                                                      | 0.1689  | 0.0040 |
| JW3510 | dppD | dipeptide/heme ABC transporter ATPas                                                      | 0.0785  | 0.0656 |
| JW3512 | dppB | dipeptide/heme ABC transporter permease                                                   | -0.0199 | 0.5028 |
| JW3513 | dppA | dipeptide/heme ABC transporter periplasmic binding protein; dipeptide chemotaxis receptor | -0.0309 | 0.3577 |
| JW3516 | yhjX | putative MFS antiporter, pyruvate-inducible                                               | -0.0094 | 0.7583 |
| JW3518 | tag  | 3-methyl-adenine DNA glycosylase I, constitutive                                          | 0.1103  | 0.0097 |
| JW3519 | viaC | GNAT family putative N-acetyltransferase                                                  | -0.0378 | 0.2641 |
| JW3524 | viaG | HTH_CROC1 family putative transcriptional regulator                                       | -0.0484 | 0.1550 |
| JW3525 | cspA | RNA chaperone and antiterminator, cold-inducible                                          | -0.0459 | 0.0946 |
| JW3526 | hokA | toxic polypeptide, small                                                                  | -0.0917 | 0.0150 |
| JW3530 | glyS | glycine tRNA synthetase, beta subunit                                                     | -0.0617 | 0.0052 |
| JW3532 | ysaB | uncharacterized protein                                                                   | 0.0747  | 0.0306 |
| JW3533 | viaH | O-acetyltransferase for enterobacterial common antigen (ECA)                              | 0.0371  | 0.0852 |
| JW3534 | viaA | YiaAB family inner membrane protein, tandem domains                                       | 0.0027  | 0.9126 |
| JW3536 | xylB | xylulokinase                                                                              | -0.0219 | 0.0667 |
| JW3537 | xylA | D-xylulose isomerase                                                                      | 0.0122  | 0.7112 |
| JW3538 | xylF | D-xylulose transporter subunit                                                            | 0.0711  | 0.0991 |
| JW3539 | xylG | D-xylulose ABC transporter dual domain ATPase                                             | -0.0512 | 0.0800 |



|        |      |                                                                                                                                         |         |        |
|--------|------|-----------------------------------------------------------------------------------------------------------------------------------------|---------|--------|
| JW3540 | xylH | D-xylose ABC transporter permease                                                                                                       | -0.0647 | 0.0081 |
| JW3541 | xylR | xylose divergent operon transcriptional activator                                                                                       | 0.0050  | 0.7927 |
| JW3543 | malS | alpha-amylase                                                                                                                           | -0.0835 | 0.0062 |
| JW3545 | yiaI | putative hydrogenase, 4Fe-4S ferredoxin-type component                                                                                  | -0.0385 | 0.1536 |
| JW3546 | yiaJ | transcriptional repressor for the yiaKLMNO-lyxK-sgbHUE operon                                                                           | 0.0445  | 0.0057 |
| JW3547 | yiaK | 2,3-diketo-L-gulonate reductase, NADH-dependent                                                                                         | 0.0199  | 0.2643 |
| JW3548 | yiaL | DUF386 family protein                                                                                                                   | 0.0838  | 0.0363 |
| JW3549 | yiaM | 2,3-diketo-L-gulonate TRAP transporter small permease protein                                                                           | -0.0371 | 0.2331 |
| JW3551 | yiaO | 2,3-diketo-L-gulonate-binding periplasmic protein                                                                                       | 0.1448  | 0.0871 |
| JW3552 | lyxK | L-xylulose kinase                                                                                                                       | 0.0035  | 0.8963 |
| JW3553 | sgbH | 3-keto-L-gulonate 6-phosphate decarboxylase                                                                                             | -0.0041 | 0.8960 |
| JW3555 | sgbE | L-ribulose-5-phosphate 4-epimerase                                                                                                      | -0.1223 | 0.0001 |
| JW3556 | yiaT | putative outer membrane protein                                                                                                         | 0.0108  | 0.6698 |
| JW3557 | yiaU | putative DNA-binding transcriptional regulator                                                                                          | 0.0020  | 0.9102 |
| JW3558 | yiaV | signal-anchored membrane fusion protein (MFP) component of efflux pump                                                                  | -0.0097 | 0.8345 |
| JW3559 | yiaW | DUF3302 family inner membrane protein                                                                                                   | 0.0360  | 0.2693 |
| JW3561 | aldB | aldehyde dehydrogenase B                                                                                                                | 0.0664  | 0.0842 |
| JW3563 | selB | selenocysteinyl-tRNA-specific translation factor                                                                                        | 0.0149  | 0.6598 |
| JW3564 | selA | selenocysteine synthase                                                                                                                 | 0.0521  | 0.0859 |
| JW3565 | yibF | glutathione S-transferase homolog                                                                                                       | -0.0079 | 0.8425 |
| JW3566 | rhsA | Rhs protein with putative toxin 55 domain; putative polysaccharide synthesis/export protein; putative neighboring cell growth inhibitor | -0.0919 | 0.4179 |
| JW3568 | yibA | putative immunity protein for polymorphic toxin RhsA; HEAT-domain protein; lethality reduction protein                                  | -0.0701 | 0.0930 |
| JW3570 | yibG | TPR-like repeat protein                                                                                                                 | 0.0384  | 0.0228 |
| JW3571 | yibH | putative membrane fusion protein (MFP) component of efflux pump                                                                         | -0.0605 | 0.0054 |
| JW3572 | yibI | DUF3302 family inner membrane protein                                                                                                   | -0.0422 | 0.3337 |
| JW3573 | mtlA | mannitol-specific PTS enzyme: IIA, IIB and IIC components                                                                               | 0.0600  | 0.1415 |
| JW3574 | mtlD | mannitol-1-phosphate dehydrogenase, NAD-dependent                                                                                       | -0.0268 | 0.1240 |
| JW3575 | mtlR | mannitol operon repressor                                                                                                               | -0.0398 | 0.6727 |
| JW3576 | yibT | uncharacterized protein                                                                                                                 | 0.0649  | 0.0649 |

|        |      |                                                                                                                                                                |         |        |
|--------|------|----------------------------------------------------------------------------------------------------------------------------------------------------------------|---------|--------|
| JW3577 | yibL | ribosome-associated DUF2810 family protein                                                                                                                     | -0.0286 | 0.3015 |
| JW3578 | lldP | L-lactate permease                                                                                                                                             | 0.0119  | 0.9014 |
| JW3579 | lldR | dual role activator/repressor for lldPRD operon                                                                                                                | 0.0056  | 0.7601 |
| JW3580 | lldD | L-lactate dehydrogenase, FMN-linked                                                                                                                            | 0.0314  | 0.0519 |
| JW3581 | yibK | tRNA Leu mC34,mU34 2'-O-methyltransferase, SAM-dependent                                                                                                       | 0.1725  | 0.0000 |
| JW3582 | cysE | serine acetyltransferase                                                                                                                                       | 0.0153  | 0.5430 |
| JW3584 | secB | protein export chaperone                                                                                                                                       | 0.0452  | 0.1677 |
| JW3585 | grxC | glutaredoxin 3                                                                                                                                                 | -0.0506 | 0.0232 |
| JW3586 | yibN | putative rhodanese-related sulfurtransferase                                                                                                                   | -0.3068 | 0.0002 |
| JW3587 | gpmI | phosphoglycero mutase III, cofactor-independent                                                                                                                | 0.1176  | 0.0061 |
| JW3590 | yibD | LPS(HepIII)-glucuronic acid glycosyltransferase                                                                                                                | 0.0635  | 0.0097 |
| JW3591 | tdh  | L-threonine 3-dehydrogenase, NAD(P)-binding                                                                                                                    | -0.0262 | 0.7017 |
| JW3592 | kbl  | glycine C-acetyltransferase                                                                                                                                    | 0.0625  | 0.1630 |
| JW3594 | rfaD | ADP-L-glycero-D-mannoheptose-6-epimerase, NAD(P)-binding                                                                                                       | -0.4487 | 0.0001 |
| JW3596 | rfaC | ADP-heptose:LPS heptosyl transferase I                                                                                                                         | -0.1844 | 0.1457 |
| JW3597 | rfaL | O-antigen ligase                                                                                                                                               | -0.1161 | 0.0028 |
| JW3599 | rfaZ | lipopolysaccharide KdoIII transferase; lipopolysaccharide core biosynthesis protein                                                                            | -0.0179 | 0.5321 |
| JW3600 | rfaY | lipopolysaccharide core biosynthesis protein                                                                                                                   | 0.1275  | 0.0006 |
| JW3601 | rfaJ | lipopolysaccharide 1,2-glucosyltransferase; UDP-glucose:(glucosyl)LPS alpha-1,2-glucosyltransferase                                                            | 0.0888  | 0.0527 |
| JW3602 | rfaI | UDP-D-galactose:(glucosyl)lipopolysaccharide-alpha-1,3-D-galactosyltransferase                                                                                 | -0.1378 | 0.0005 |
| JW3603 | rfaB | lipopolysaccharide 1,6-galactosyltransferase; UDP-D-galactose:(glucosyl)lipopolysaccharide-1,6-D-galactosyltransferase                                         | 0.0153  | 0.6389 |
| JW3604 | rfaS | lipopolysaccharide rhamnose:KdoIII transferase; lipopolysaccharide core biosynthesis protein                                                                   | 0.0409  | 0.1275 |
| JW3605 | rfaP | kinase that phosphorylates core heptose of lipopolysaccharide                                                                                                  | 0.0326  | 0.6467 |
| JW3606 | rfaG | UDP-glucose:(heptosyl)lipopolysaccharide alpha-1,3-glucosyltransferase; lipopolysaccharide core biosynthesis protein; lipopolysaccharide glucosyltransferase I | -0.6413 | 0.0000 |
| JW3610 | mutM | formamidopyrimidine/5-formyluracil/ 5-hydroxymethyluracil DNA glycosylase                                                                                      | 0.0080  | 0.6714 |
| JW3611 | rpmG | 50S ribosomal subunit protein L33                                                                                                                              | -0.0690 | 0.1171 |
| JW3617 | pyrE | orotate phosphoribosyltransferase                                                                                                                              | 0.0657  | 0.4236 |

|        |      |                                                                      |         |        |
|--------|------|----------------------------------------------------------------------|---------|--------|
| JW3618 | rph  | ribonuclease PH (defective)                                          | -0.0286 | 0.1049 |
| JW3619 | yicC | UPF0701 family protein                                               | -0.1729 | 0.0002 |
| JW3620 | dinD | DNA damage-inducible protein                                         | -0.0389 | 0.1716 |
| JW3621 | yicG | UPF0126 family inner membrane protein                                | -0.0761 | 0.1274 |
| JW3622 | ligB | DNA ligase, NAD(+)-dependent                                         | -0.0191 | 0.3064 |
| JW3624 | rpoZ | RNA polymerase, omega subunit                                        | -0.0726 | 0.0036 |
| JW3626 | trmH | tRNA mG18-2'-O-methyltransferase, SAM-dependent                      | -0.0670 | 0.0821 |
| JW3627 | recG | ATP-dependent DNA helicase                                           | -0.1451 | 0.0094 |
| JW3628 | gltS | glutamate transporter                                                | -0.0085 | 0.6682 |
| JW3629 | yicE | xanthine permease                                                    | -0.0228 | 0.5683 |
| JW3630 | yicH | putative inner membrane-anchored periplasmic AsmA family protein     | -0.0080 | 0.6994 |
| JW3631 | yicI | putative alpha-glucosidase                                           | 0.0638  | 0.0490 |
| JW3633 | setC | putative arabinose efflux transporter                                | 0.0564  | 0.1218 |
| JW3634 | yicL | EamA family inner membrane putative transporter                      | -0.0114 | 0.5995 |
| JW3635 | nlpA | cytoplasmic membrane lipoprotein-28                                  | -0.1043 | 0.0000 |
| JW3640 | ade  | cryptic adenine deaminase                                            | -0.0367 | 0.4539 |
| JW3641 | uhpT | hexose phosphate transporter                                         | -0.0079 | 0.8709 |
| JW3642 | uhpC | membrane protein regulates uhpT expression                           | -0.0555 | 0.1683 |
| JW3643 | uhpB | sensory histidine kinase in two-component regulatory sytem with UhpA | 0.0009  | 0.9504 |
| JW3644 | uhpA | response regulator in two-component regulatory system wth UhpB       | 0.0492  | 0.0623 |
| JW3645 | ilvN | acetolactate synthase 1 small subunit                                | -0.0173 | 0.7538 |
| JW3646 | ilvB | acetolactate synthase 2 large subunit                                | -0.1984 | 0.1469 |
| JW3646 | ilvB | acetolactate synthase 2 large subunit                                | 0.0852  | 0.2961 |
| JW3647 | ivbL | ilvB operon leader peptide                                           | -0.0447 | 0.0566 |
| JW3650 | yidF | putative Cys-type oxidative YidJ-maturing enzyme                     | 0.1074  | 0.0043 |
| JW3651 | yidG | inner membrane protein                                               | -0.0956 | 0.0034 |
| JW3652 | yidH | DUF202 family inner membrane protein                                 | 0.0042  | 0.7241 |
| JW3653 | yidI | inner membrane protein                                               | -0.1679 | 0.0856 |
| JW3654 | yidJ | sulfatase/phosphatase superfamily protein                            | -0.0675 | 0.0369 |
| JW3655 | yidK | putative SSF family symporter                                        | 0.0510  | 0.0316 |
| JW3656 | yidL | AraC family putative transcriptional regulator                       | 0.0283  | 0.7603 |
| JW3658 | glvG | pseudogene                                                           | 0.0650  | 0.1535 |
| JW3659 | glvB | pseudogene, arbutin specific enzyme IIC component of PTS             | -0.1737 | 0.0007 |
| JW3660 | glvC | Putative permease IIC component                                      | -0.0451 | 0.0362 |

|        |      |                                                                                      |         |        |
|--------|------|--------------------------------------------------------------------------------------|---------|--------|
| JW3661 | yidP | UTRA domain-containing GntR family putative transcriptional regulator                | -0.0443 | 0.3691 |
| JW3662 | yidE | putative transporter                                                                 | -0.0107 | 0.6227 |
| JW3663 | ibpB | heat shock chaperone                                                                 | -0.0679 | 0.0364 |
| JW3664 | ibpA | heat shock chaperone                                                                 | -0.0615 | 0.0298 |
| JW3670 | dgoK | 2-oxo-3-deoxygalactonate kinase                                                      | 0.0209  | 0.4954 |
| JW3674 | yidA | sugar phosphate phosphatase                                                          | -0.4830 | 0.0016 |
| JW3675 | yidB | DUF937 family protein                                                                | -0.0562 | 0.2145 |
| JW3677 | recF | gap repair protein                                                                   | -0.0133 | 0.7870 |
| JW3682 | yidD | membrane protein insertion efficiency factor, UPF0161 family inner membrane protein  | -0.0527 | 0.0391 |
| JW3684 | trmE | tRNA U34 5-methylaminomethyl-2-thiouridine modification GTPase                       | 0.0783  | 0.0486 |
| JW3685 | tnaC | tryptophanase leader peptide                                                         | -0.0717 | 0.1092 |
| JW3686 | tnaA | tryptophanase/L-cysteine desulphydrase, PLP-dependent                                | -0.0098 | 0.6594 |
| JW3688 | mdtL | multidrug efflux system protein                                                      | -0.0702 | 0.2128 |
| JW3689 | yidZ | putative DNA-binding transcriptional regulator                                       | -0.0384 | 0.2042 |
| JW3690 | yieE | phosphopantetheinyl transferase superfamily protein                                  | -0.0112 | 0.6139 |
| JW3691 | yieF | chromate reductase, Class I, flavoprotein                                            | 0.0231  | 0.4132 |
| JW3692 | yieG | adenine permease, high affinity; adenine:H <sup>+</sup> symporter                    | 0.0087  | 0.8698 |
| JW3693 | yieH | phosphoenolpyruvate and 6-phosphogluconate phosphatase                               | -0.0418 | 0.1886 |
| JW3694 | yieI | PRK09823 family inner membrane protein, creBC regulon                                | -0.0578 | 0.0589 |
| JW3698 | bglH | carbohydrate-specific outer membrane porin, cryptic                                  | -0.0035 | 0.8681 |
| JW3699 | bglB | cryptic phospho-beta-glucosidase B                                                   | 0.2995  | 0.0030 |
| JW3700 | bglF | fused beta-glucoside-specific PTS enzymes: IIA component/IIB component/IIC component | -0.0492 | 0.0751 |
| JW3701 | bglG | transcriptional antiterminator of the bgl operon                                     | 0.0073  | 0.7075 |
| JW3702 | phoU | negative regulator of PhoR/PhoB two-component regulator                              | -0.0093 | 0.6000 |
| JW3703 | pstB | phosphate ABC transporter ATPase                                                     | 0.0074  | 0.8225 |
| JW3704 | pstA | phosphate ABC transporter permease                                                   | -0.0128 | 0.7848 |
| JW3705 | pstC | phosphate ABC transporter permease                                                   | 0.0703  | 0.3591 |
| JW3706 | pstS | phosphate ABC transporter periplasmic binding protein                                | -0.1685 | 0.0632 |
| JW3709 | atpC | F1 sector of membrane-bound ATP synthase, epsilon subunit                            | 0.0576  | 0.3321 |
| JW3710 | atpD | F1 sector of membrane-bound ATP synthase, beta subunit                               | -0.1362 | 0.0264 |
| JW3711 | atpG | F1 sector of membrane-bound ATP synthase, gamma subunit                              | -0.0575 | 0.0844 |
| JW3712 | atpA | F1 sector of membrane-bound ATP synthase, alpha subunit                              | 0.0267  | 0.2405 |

|        |      |                                                                                             |         |        |
|--------|------|---------------------------------------------------------------------------------------------|---------|--------|
| JW3713 | atpH | F1 sector of membrane-bound ATP synthase, delta subunit                                     | -0.0411 | 0.6908 |
| JW3714 | atpF | F0 sector of membrane-bound ATP synthase, subunit b                                         | -0.2296 | 0.0131 |
| JW3715 | atpE | F0 sector of membrane-bound ATP synthase, subunit c                                         | -0.2295 | 0.0122 |
| JW3716 | atpB | F0 sector of membrane-bound ATP synthase, subunit a                                         | -0.1718 | 0.0027 |
| JW3718 | gidB | 16S rRNA m(7)G527 methyltransferase, SAM-dependent; glucose-inhibited cell-division protein | 0.0661  | 0.0012 |
| JW3719 | gidA | 5-methylaminomethyl-2-thiouridine modification at tRNA U34                                  | 0.0487  | 0.0866 |
| JW3720 | mioC | FMN-binding protein MioC                                                                    | -0.0132 | 0.4293 |
| JW3721 | asnC | transcriptional activator of asnA; autorepressor                                            | -0.0155 | 0.5516 |
| JW3722 | asnA | asparagine synthetase A                                                                     | -0.0073 | 0.7750 |
| JW3725 | yieN | hexameric AAA+ MoxR family ATPase, putative molecular chaperone                             | 0.0266  | 0.0100 |
| JW3728 | rbsA | D-ribose ABC transporter ATPase                                                             | -0.0400 | 0.0743 |
| JW3729 | rbsC | D-ribose ABC transporter permease                                                           | 0.0344  | 0.4020 |
| JW3730 | rbsB | D-ribose ABC transporter periplasmic binding protein; ribose chemotaxis receptor            | -0.0082 | 0.6730 |
| JW3731 | rbsK | ribokinase                                                                                  | -0.0601 | 0.0013 |
| JW3732 | rbsR | transcriptional repressor of ribose metabolism                                              | -0.0899 | 0.0011 |
| JW3733 | hsrA | putative multidrug or homocysteine efflux system                                            | -0.1365 | 0.0942 |
| JW3737 | yifE | UPF0438 family protein                                                                      | -0.0573 | 0.4672 |
| JW3738 | yifB | magnesium chelatase family protein and putative transcriptional regulator                   | -0.0059 | 0.8526 |
| JW3739 | ilvL | ilvG operon leader peptide                                                                  | 0.0295  | 0.2400 |
| JW3741 | ilvG | Acetolactate synthase isozyme 2 large subunit                                               | -0.1615 | 0.0000 |
| JW3742 | ilvM | acetolactate synthase 2 small subunit                                                       | -0.0099 | 0.7133 |
| JW3745 | ilvA | l-threonine dehydratase, biosynthetic; also known as threonine deaminase                    | 0.1629  | 0.1567 |
| JW3746 | ilvY | transcriptional activator of ilvC; autorepressor                                            | 0.0646  | 0.4231 |
| JW3747 | ilvC | ketol-acid reductoisomerase, NAD(P)-binding                                                 | 0.0026  | 0.9170 |
| JW3748 | ppiC | peptidyl-prolyl cis-trans isomerase C (rotamase C)                                          | -0.0083 | 0.7812 |
| JW3749 | yifO | PemK toxin family pseudogene                                                                | -0.0945 | 0.0003 |
| JW3750 | yifN | Putative uncharacterized protein                                                            | -0.0456 | 0.3952 |
| JW3753 | rhlB | ATP-dependent RNA helicase                                                                  | -0.0271 | 0.5588 |
| JW3755 | rhoL | Putative rho operon leader peptide                                                          | -0.2994 | 0.0006 |
| JW3756 | rho  | transcription termination factor                                                            | 0.0571  | 0.3580 |

|        |      |                                                                                                                                                     |         |        |
|--------|------|-----------------------------------------------------------------------------------------------------------------------------------------------------|---------|--------|
| JW3758 | rfe  | UDP-GlcNAc:undecaprenylphosphate<br>GlcNAc-1-phosphate transferase                                                                                  | -0.2724 | 0.0104 |
| JW3763 | rffH | glucose-1-phosphate thymidyltransferase                                                                                                             | 0.0389  | 0.4653 |
| JW3766 | wzxE | O-antigen translocase                                                                                                                               | 0.0750  | 0.0283 |
| JW3770 | rffM | UDP-N-acetyl-D-mannosaminuronic acid<br>transferase                                                                                                 | -0.0021 | 0.9569 |
| JW3773 | aslA | putative Ser-type periplasmic non-aryl<br>sulfatase                                                                                                 | -0.0558 | 0.0951 |
| JW3774 | hemY | putative protoheme IX synthesis protein                                                                                                             | 0.0237  | 0.2910 |
| JW3775 | hemX | putative uroporphyrinogen III<br>methyltransferase                                                                                                  | -0.0430 | 0.4150 |
| JW3778 | cyaA | adenylate cyclase                                                                                                                                   | 0.0304  | 0.1221 |
| JW3779 | cyaY | iron-dependent inhibitor of iron-sulfur<br>cluster formation; frataxin; iron-binding and<br>oxidizing protein                                       | -0.2253 | 0.1077 |
| JW3780 | yzcX | Putative uncharacterized protein b3808                                                                                                              | -0.1280 | 0.0204 |
| JW3781 | yifL | putative lipoprotein                                                                                                                                | -0.0296 | 0.2550 |
| JW3783 | yigA | DUF484 family protein                                                                                                                               | 0.0257  | 0.3327 |
| JW3784 | xerC | site-specific tyrosine recombinase                                                                                                                  | 0.0084  | 0.8077 |
| JW3786 | uvrD | DNA-dependent ATPase I and helicase II                                                                                                              | 0.0137  | 0.6364 |
| JW3789 | corA | magnesium/nickel/cobalt transporter                                                                                                                 | -0.0383 | 0.4289 |
| JW3794 | pldA | outer membrane phospholipase A                                                                                                                      | -0.0265 | 0.1580 |
| JW3803 | yigM | putative inner membrane EamA-like<br>transporter                                                                                                    | 0.0580  | 0.3286 |
| JW3804 | metR | methionine biosynthesis regulon<br>transcriptional regulator                                                                                        | -0.0007 | 0.9801 |
| JW3805 | metE | 5-methyltetrahydropteroyltriglutamate-<br>homocysteine S-methyltransferase                                                                          | -0.1560 | 0.0438 |
| JW3808 | udp  | uridine phosphorylase                                                                                                                               | -0.0070 | 0.8751 |
| JW3809 | rmuC | DNA recombination protein                                                                                                                           | -0.1448 | 0.1469 |
| JW3813 | tatA | TatABCE protein translocation system<br>subunit                                                                                                     | 0.1347  | 0.0839 |
| JW3815 | tatC | TatABCE protein translocation system<br>subunit                                                                                                     | -0.0347 | 0.4081 |
| JW3818 | rfaH | transcription antitermination protein                                                                                                               | -0.2129 | 0.0072 |
| JW3820 | fre  | NAD(P)H-flavin reductase                                                                                                                            | 0.1218  | 0.0076 |
| JW3822 | fadB | fused 3-hydroxybutyryl-CoA<br>epimerase/delta(3)-cis-delta(2)-trans-enoyl-<br>CoA isomerase/enoyl-CoA hydratase/3-<br>hydroxyacyl-CoA dehydrogenase | 0.0083  | 0.7800 |
| JW3823 | pepQ | proline dipeptidase                                                                                                                                 | -0.1424 | 0.0007 |
| JW3829 | mobA | molybdopterin-guanine dinucleotide<br>synthase                                                                                                      | -0.3214 | 0.0108 |
| JW3830 | yihD | DUF1040 protein YihD                                                                                                                                | 0.1298  | 0.0005 |
| JW3831 | yihE | Cpx stress response Thr/Ser protein kinase;<br>MazF antagonist protein                                                                              | 0.0040  | 0.8546 |
| JW3834 | yihG | inner membrane protein, inner membrane<br>acyltransferase                                                                                           | -0.0361 | 0.1908 |

|        |      |                                                                                                                                                                                                                 |         |        |
|--------|------|-----------------------------------------------------------------------------------------------------------------------------------------------------------------------------------------------------------------|---------|--------|
| JW3835 | polA | 5' to 3' DNA polymerase and 3' to 5'/5' to 3' exonuclease                                                                                                                                                       | -0.1283 | 0.1608 |
| JW3837 | yihI | activator of Der GTPase                                                                                                                                                                                         | 0.0349  | 0.0923 |
| JW3838 | hemN | coproporphyrinogen III oxidase, SAM and NAD(P)H dependent, oxygen-independent fused DNA-binding response regulator in two-component regulatory system with GlnL: response regulator/sigma54 interaction protein | -0.0987 | 0.0481 |
| JW3839 | glnG | sensory histidine kinase in two-component regulatory system with GlnG                                                                                                                                           | 0.0138  | 0.3878 |
| JW3840 | glnL | glutamine synthetase                                                                                                                                                                                            | -0.1649 | 0.0076 |
| JW3841 | glnA | putative DNA-binding transcriptional regulator                                                                                                                                                                  | 0.1034  | 0.0343 |
| JW3843 | yihL | putative sugar phosphate isomerase                                                                                                                                                                              | -0.2495 | 0.0572 |
| JW3844 | yihM | MFS transporter family protein                                                                                                                                                                                  | -0.0214 | 0.5425 |
| JW3845 | yihN |                                                                                                                                                                                                                 | 0.0100  | 0.6825 |
| JW3846 | ompL | outer membrane porin L; putative sulpholipid porin                                                                                                                                                              | 0.0768  | 0.0121 |
| JW3848 | yihP | putative 2,3-dihydroxypropane-1-sulphonate exporter, membrane protein                                                                                                                                           | 0.0202  | 0.3694 |
| JW3849 | yihQ | putative sulpholipid alpha-glucosidase; alpha-glucosyl fluoride glucosidase                                                                                                                                     | 0.0026  | 0.9160 |
| JW3850 | yihR | putative sulphoquinovose mutarotase                                                                                                                                                                             | -0.0726 | 0.0021 |
| JW3852 | yihT | 6-deoxy-6-sulphofructose-1-phosphate aldolase                                                                                                                                                                   | -0.0214 | 0.4496 |
| JW3853 | yihU | 3-sulpholactaldehyde (SLA) reductase, NADH-dependent; gamma-hydroxybutyrate dehydrogenase, NADH-dependent                                                                                                       | -0.1102 | 0.3913 |
| JW3857 | rbn  | BrkB family putative transporter, inner membrane protein                                                                                                                                                        | 0.0367  | 0.1902 |
| JW3858 | dtd  | D-tyr-tRNA(Tyr) deacylase                                                                                                                                                                                       | 0.0217  | 0.4251 |
| JW3859 | yiiD | GNAT family putative N-acetyltransferase                                                                                                                                                                        | 0.0352  | 0.0196 |
| JW3862 | fdhE | formate dehydrogenase formation protein                                                                                                                                                                         | -0.0253 | 0.2875 |
| JW3863 | fdoI | formate dehydrogenase-O, cytochrome b556 subunit                                                                                                                                                                | -0.0510 | 0.0177 |
| JW3864 | fdoH | formate dehydrogenase-O, Fe-S subunit                                                                                                                                                                           | -0.0641 | 0.3615 |
| JW3865 | fdoG | formate dehydrogenase-O, large subunit                                                                                                                                                                          | 0.0189  | 0.4264 |
| JW3866 | fdhD | formate dehydrogenase formation protein                                                                                                                                                                         | -0.0211 | 0.6401 |
| JW3867 | yiiG | DUF3829 family lipoprotein                                                                                                                                                                                      | -0.0299 | 0.2531 |

|        |      |                                                                        |         |        |
|--------|------|------------------------------------------------------------------------|---------|--------|
| JW3868 | frvR | putative frv operon regulator; contains a PTS EIIA domain              | 0.1079  | 0.0009 |
| JW3869 | frvX | putative peptidase                                                     | 0.0920  | 0.0138 |
| JW3872 | yiiL | L-rhamnose mutarotase                                                  | -0.1059 | 0.4247 |
| JW3876 | rhaS | transcriptional activator of rhaBAD and rhaT                           | -0.1041 | 0.0084 |
| JW3877 | rhaR | transcriptional activator of rhaSR                                     | 0.0068  | 0.8273 |
| JW3878 | rhaT | L-rhamnose:proton symporter                                            | 0.0126  | 0.7506 |
| JW3879 | sodA | superoxide dismutase, Mn                                               | 0.1590  | 0.0000 |
| JW3882 | cpxA | sensory histidine kinase in two-component regulatory system with CpxR  | -0.0050 | 0.7748 |
| JW3883 | cpxR | response regulator in two-component regulatory system with CpxA        | -0.0319 | 0.0668 |
| JW3886 | fieF | ferrous iron and zinc transporter                                      | 0.0356  | 0.2591 |
| JW3887 | pfkA | 6-phosphofructokinase I                                                | -0.0066 | 0.9259 |
| JW3888 | sbp  | sulfate transporter subunit                                            | 0.0603  | 0.0623 |
| JW3889 | cdh  | CDP-diacylglycerol phosphatidylhydrolase                               | 0.0464  | 0.2100 |
| JW3890 | tpiA | triosephosphate isomerase                                              | -0.0105 | 0.5825 |
| JW3891 | yiiQ | DUF1454 family putative periplasmic protein                            | -0.0511 | 0.2446 |
| JW3892 | yiiR | DUF805 family putative inner membrane protein                          | 0.0264  | 0.1518 |
| JW3893 | yiiS | UPF0381 family protein                                                 | 0.0134  | 0.7156 |
| JW3894 | yiiT | stress-induced protein                                                 | -0.0500 | 0.3747 |
| JW3895 | fpr  | ferredoxin-NADP reductase; flavodoxin reductase                        | -0.0132 | 0.5741 |
| JW3896 | glpX | fructose 1,6-bisphosphatase II                                         | 0.1074  | 0.0005 |
| JW3897 | glpK | glycerol kinase                                                        | 0.0217  | 0.3347 |
| JW3898 | glpF | glycerol facilitator                                                   | 0.0330  | 0.6058 |
| JW3899 | yiiU | FtsZ stabilizer, septal ring assembly factor, cell division stimulator | -0.0295 | 0.3164 |
| JW3900 | rraA | ribonuclease E (RNase E) inhibitor protein                             | 0.0557  | 0.1763 |
| JW3901 | menA | 1,4-dihydroxy-2-naphthoate octaprenyltransferase                       | 0.1463  | 0.0383 |
| JW3902 | hslU | molecular chaperone and ATPase component of HslUV protease             | -0.1315 | 0.1124 |
| JW3903 | hslV | peptidase component of the HslUV protease                              | 0.1346  | 0.0965 |
| JW3905 | cytR | Anti-activator for CytR-CRP nucleoside utilization regulon             | -0.0330 | 0.3792 |
| JW3906 | priA | Primosome factor n' (replication factor Y)                             | -0.1203 | 0.2563 |
| JW3907 | rpmE | 50S ribosomal subunit protein L31                                      | -0.0300 | 0.3927 |
| JW3908 | yiiX | putative lipid binding hydrolase, DUF830 family protein                | 0.0431  | 0.3067 |
| JW3909 | metJ | transcriptional repressor, S-adenosylmethionine-binding                | 0.0199  | 0.3648 |
| JW3910 | metB | cystathionine gamma-synthase, PLP-dependent                            | 0.1454  | 0.0335 |
| JW3911 | metL | Bifunctional aspartokinase/homoserine dehydrogenase 2                  | 0.2835  | 0.0001 |



|        |      |                                                                                                        |         |        |
|--------|------|--------------------------------------------------------------------------------------------------------|---------|--------|
| JW3913 | metF | 5,10-methylenetetrahydrofolate reductase                                                               | 0.1244  | 0.0989 |
| JW3914 | katG | catalase-peroxidase HPI, heme b-containing                                                             | 0.1740  | 0.0441 |
| JW3916 | yijF | DUF1287 family protein                                                                                 | 0.1008  | 0.0605 |
| JW3918 | fsaB | fructose-6-phosphate aldolase 2                                                                        | -0.0462 | 0.0892 |
| JW3921 | frwC | putative enzyme IIC component of PTS                                                                   | 0.0681  | 0.3218 |
| JW3922 | frwB | putative enzyme IIB component of PTS                                                                   | 0.0417  | 0.2506 |
| JW3923 | pflD | putative glycine radical domain-containing pyruvate formate-lyase                                      | -0.0316 | 0.7403 |
| JW3924 | pflC | putative [formate-C-acetyltransferase 2]-activating enzyme; pyruvate formate-lyase 1-activating enzyme | 0.1449  | 0.0414 |
| JW3925 | frwD | putative enzyme IIB component of PTS                                                                   | 0.0683  | 0.0169 |
| JW3926 | yijO | AraC family putative transcriptional activator                                                         | 0.0747  | 0.0074 |
| JW3927 | yijP | LPS heptose I phosphoethanolamine transferase                                                          | -0.0492 | 0.0841 |
| JW3928 | ppc  | phosphoenolpyruvate carboxylase                                                                        | 0.0714  | 0.2908 |
| JW3929 | argE | acetylornithine deacetylase                                                                            | 0.1514  | 0.0182 |
| JW3929 | argE | acetylornithine deacetylase                                                                            | 0.2009  | 0.0979 |
| JW3930 | argC | N-acetyl-gamma-glutamylphosphate reductase, NAD(P)-binding                                             | -0.0712 | 0.0300 |
| JW3932 | argH | argininosuccinate lyase                                                                                | 0.2251  | 0.0738 |
| JW3933 | oxyR | oxidative and nitrosative stress transcriptional regulator                                             | -0.0213 | 0.2811 |
| JW3935 | fabR | transcriptional repressor of fabA and fabB                                                             | -0.0230 | 0.2840 |
| JW3936 | yijD | DUF1422 family inner membrane protein                                                                  | 0.0623  | 0.0303 |
| JW3937 | trmA | tRNA m(5)U54 methyltransferase, SAM-dependent; tmRNA m(5)U341 methyltransferase                        | -0.0141 | 0.7504 |
| JW3938 | btuB | vitamin B12/cobalamin outer membrane transporter                                                       | 0.1766  | 0.0032 |
| JW3942 | coaA | pantothenate kinase                                                                                    | -0.0751 | 0.0953 |
| JW3943 | tufB | translation elongation factor EF-Tu 2                                                                  | -0.1795 | 0.0167 |
| JW3946 | rplK | 50S ribosomal subunit protein L11                                                                      | -0.1410 | 0.0005 |
| JW3947 | rplA | 50S ribosomal subunit protein L1                                                                       | 0.0430  | 0.0967 |
| JW3952 | htrC | stationary phase growth adaptation protein                                                             | 0.0052  | 0.8347 |
| JW3953 | thiH | tyrosine lyase, involved in thiamine-thiazole moiety synthesis                                         | -0.0043 | 0.9173 |
| JW3955 | thiS | immediate sulfur donor in thiazole formation                                                           | 0.2002  | 0.0002 |
| JW3956 | thiF | adenylyltransferase, modifies ThiS C-terminus                                                          | 0.1205  | 0.0159 |
| JW3957 | thiE | thiamine phosphate synthase (thiamine phosphate pyrophosphorylase)                                     | 0.0970  | 0.0539 |
| JW3958 | thiC | phosphomethylpyrimidine synthase                                                                       | 0.0992  | 0.0718 |

|        |      |                                                                                                                                   |         |        |
|--------|------|-----------------------------------------------------------------------------------------------------------------------------------|---------|--------|
| JW3959 | rsd  | stationary phase protein, binds sigma 70 RNA polymerase subunit                                                                   | 0.0364  | 0.1967 |
| JW3961 | hemE | uroporphyrinogen decarboxylase                                                                                                    | 0.0146  | 0.4571 |
| JW3963 | yjaG | DUF416 domain protein                                                                                                             | 0.0676  | 0.0522 |
| JW3964 | hupA | HU, DNA-binding transcriptional regulator, alpha subunit                                                                          | -0.0523 | 0.0143 |
| JW3965 | yjaH | DUF1481 family putative lipoprotein                                                                                               | -0.1815 | 0.1789 |
| JW3967 | zraS | sensory histidine kinase in two-component regulatory system with ZraR                                                             | 0.0384  | 0.4628 |
| JW3968 | zraR | fused DNA-binding response regulator in two-component regulatory system with ZraS: response regulator/sigma54 interaction protein | 0.0470  | 0.0732 |
| JW3969 | purD | phosphoribosylglycinamide synthetase                                                                                              | 0.1248  | 0.0216 |
| JW3970 | purH | phosphoribosylamine-glycine ligase<br>IMP cyclohydrolase and<br>phosphoribosylaminoimidazolecarboxamide formyltransferase         | 0.0317  | 0.4788 |
| JW3971 | yjaA | stress-induced protein                                                                                                            | 0.0208  | 0.5092 |
| JW3972 | yjaB | GNAT-family putative N-acetyltransferase; acetyl coenzyme A-binding protein                                                       | 0.1350  | 0.0221 |
| JW3973 | metA | homoserine O-transsuccinylase                                                                                                     | 0.0088  | 0.8970 |
| JW3974 | aceB | malate synthase A                                                                                                                 | -0.0034 | 0.9377 |
| JW3975 | aceA | isocitrate lyase                                                                                                                  | 0.1521  | 0.0457 |
| JW3976 | aceK | isocitrate dehydrogenase<br>kinase/phosphatase                                                                                    | 0.0409  | 0.0221 |
| JW3977 | arpA | ankyrin repeat protein                                                                                                            | 0.0005  | 0.9898 |
| JW3978 | iclR | transcriptional repressor                                                                                                         | -0.0184 | 0.3766 |
| JW3979 | metH | homocysteine-N5-methyltetrahydrofolate transmethylase, B12-dependent                                                              | -0.0291 | 0.5668 |
| JW3980 | yjbB | putative Na <sup>+</sup> /Pi-cotransporter                                                                                        | 0.1183  | 0.0011 |
| JW3981 | pepE | peptidase E, alpha-aspartyl dipeptidase                                                                                           | -0.0381 | 0.3159 |
| JW3982 | yjbC | 23S rRNA pseudouridine(2604) synthase                                                                                             | 0.2157  | 0.0058 |
| JW3983 | yjbD | DUF3811 family protein                                                                                                            | 0.1185  | 0.0006 |
| JW3984 | lysC | lysine-sensitive aspartokinase 3                                                                                                  | -0.3475 | 0.0006 |
| JW3985 | pgi  | glucosephosphate isomerase                                                                                                        | 0.0459  | 0.0930 |
| JW3986 | yjbE | extracellular polysaccharide production<br>threonine-rich protein                                                                 | 0.0439  | 0.1666 |
| JW3988 | yjbG | extracellular polysaccharide export OMA<br>protein                                                                                | 0.0997  | 0.0680 |
| JW3989 | yjbH | DUF940 family extracellular polysaccharide<br>protein                                                                             | -0.0079 | 0.5611 |
| JW3990 | yjbA | phosphate starvation inducible protein                                                                                            | 0.1146  | 0.0017 |

|        |      |                                                                                                             |         |        |
|--------|------|-------------------------------------------------------------------------------------------------------------|---------|--------|
| JW3991 | xylE | D-xylose transporter                                                                                        | 0.0330  | 0.4698 |
| JW3992 | malG | maltose transporter subunit                                                                                 | -0.0001 | 0.9990 |
| JW3993 | malF | maltose transporter subunit                                                                                 | 0.0241  | 0.4976 |
| JW3994 | malE | maltose transporter subunit                                                                                 | 0.2064  | 0.0017 |
| JW3995 | malK | maltose ABC transportor ATPase                                                                              | 0.0159  | 0.5248 |
| JW3996 | lamB | maltose outer membrane porin (maltoporin)                                                                   | 0.0324  | 0.3355 |
| JW3997 | malM | maltose regulon periplasmic protein                                                                         | -0.0124 | 0.1705 |
| JW3998 | yjbI | pseudogene, SopA-related, pentapeptide repeats-containing                                                   | -0.1504 | 0.0009 |
| JW4002 | dgkA | diacylglycerol kinase                                                                                       | -0.0105 | 0.7889 |
| JW4004 | dinF | oxidative stress resistance protein; putative MATE family efflux pump; UV and mitomycin C inducible protein | 0.1563  | 0.0707 |
| JW4005 | yjbJ | stress-induced protein, UPF0337 family                                                                      | 0.1386  | 0.0070 |
| JW4007 | yjbL | uncharacterized protein                                                                                     | -0.0817 | 0.0186 |
| JW4008 | yjbM | uncharacterized protein                                                                                     | 0.0663  | 0.0454 |
| JW4011 | qor  | quinone oxidoreductase, NADPH-dependent                                                                     | -0.0081 | 0.5312 |
| JW4013 | alr  | alanine racemase, biosynthetic, PLP-binding                                                                 | -0.1504 | 0.2819 |
| JW4014 | tyrB | tyrosine aminotransferase, tyrosine-repressible, PLP-dependent                                              | 0.0744  | 0.0710 |
| JW4015 | aphA | acid phosphatase/phosphotransferase, class B, non-specific                                                  | -0.0096 | 0.7330 |
| JW4017 | yjbQ | thiamine phosphate synthase                                                                                 | -0.0361 | 0.1725 |
| JW4018 | yjbR | DUF419 family protein                                                                                       | 0.0424  | 0.1049 |
| JW4019 | uvrA | ATPase and DNA damage recognition protein of nucleotide excision repair excinuclease UvrABC                 | 0.0591  | 0.1648 |
| JW4022 | yjcC | putative membrane-anchored cyclic-di-GMP phosphodiesterase                                                  | -0.1103 | 0.0000 |
| JW4023 | soxS | superoxide response regulon transcriptional activator; autoregulator                                        | 0.1293  | 0.0000 |
| JW4024 | soxR | redox-sensitive transcriptional activator of soxS; autorepressor                                            | 0.0624  | 0.0130 |
| JW4025 | yjcD | guanine/hypoxanthine permease, high affinity; guanine/hypoxanthine:H <sup>+</sup> symporter                 | 0.0543  | 0.1601 |
| JW4026 | yjcE | putative cation/proton antiporter                                                                           | -0.0061 | 0.8326 |
| JW4028 | actP | acetate transporter                                                                                         | -0.0061 | 0.6418 |
| JW4029 | yjcH | DUF485 family inner membrane protein                                                                        | -0.0764 | 0.0216 |
| JW4030 | acs  | acetyl-CoA synthetase                                                                                       | -0.0423 | 0.5786 |
| JW4031 | nrfA | nitrite reductase, formate-dependent, cytochrome                                                            | 0.0311  | 0.3126 |
| JW4032 | nrfB | nitrite reductase, formate-dependent, pentaheme cytochrome c                                                | 0.1010  | 0.0378 |
| JW4033 | nrfC | formate-dependent nitrite reductase, 4Fe4S subunit                                                          | -0.0241 | 0.6271 |

|        |      |                                                                                           |         |        |
|--------|------|-------------------------------------------------------------------------------------------|---------|--------|
| JW4034 | nrfD | formate-dependent nitrite reductase, membrane subunit                                     | -0.0174 | 0.5623 |
| JW4035 | nrfE | heme lyase (NrfEFG) for insertion of heme into c552, subunit NrfE                         | -0.0107 | 0.8215 |
| JW4036 | nrfF | heme lyase (NrfEFG) for insertion of heme into c552, subunit NrfF                         | 0.2976  | 0.0693 |
| JW4037 | nrfG | heme lyase (NrfEFG) for insertion of heme into c552, subunit NrfG                         | 0.0685  | 0.1597 |
| JW4038 | gltP | glutamate/aspartate:proton symporter                                                      | -0.0731 | 0.0405 |
| JW4039 | yjcO | Sel1 family TPR-like repeat protein                                                       | -0.0687 | 0.0072 |
| JW4040 | fdhF | formate dehydrogenase-H, selenopolypeptide subunit                                        | 0.0523  | 0.0780 |
| JW4041 | yjcP | outer membrane factor of efflux pump                                                      | -0.0859 | 0.0026 |
| JW4042 | yjcQ | membrane translocase (MDR) of MdtNOP efflux pump, PET family                              | -0.0754 | 0.0007 |
| JW4043 | yjcR | membrane fusion protein of efflux pump                                                    | -0.0108 | 0.6887 |
| JW4046 | alsE | allulose-6-phosphate 3-epimerase                                                          | -0.0257 | 0.3193 |
| JW4047 | alsC | D-allose ABC transporter permease                                                         | -0.0934 | 0.0054 |
| JW4048 | alsA | D-allose ABC transporter ATPase                                                           | -0.0297 | 0.1739 |
| JW4049 | alsB | D-allose ABC transporter periplasmic binding protein                                      | 0.0198  | 0.4884 |
| JW4050 | rpiR | d-allose-inducible als operon transcriptional repressor; autorepressor; repressor of rpiR | -0.0240 | 0.6215 |
| JW4051 | rpiB | ribose 5-phosphate isomerase B/allose 6-phosphate isomerase                               | -0.1189 | 0.0032 |
| JW4053 | phnP | 5-phospho-alpha-D-ribosyl 1,2-cyclic phosphate phosphodiesterase                          | -0.0207 | 0.4011 |
| JW4054 | phnO | aminoalkylphosphonate N-acetyltransferase                                                 | -0.0207 | 0.4535 |
| JW4055 | phnN | ribose 1,5-bisphosphokinase                                                               | 0.0786  | 0.0198 |
| JW4056 | phnM | ribophosphonate triphosphate hydrolase                                                    | -0.0012 | 0.9414 |
| JW4057 | phnL | ribophosphonate triphosphate synthase subunit; putative ABC transporter-related ATPase    | 0.0485  | 0.1280 |
| JW4059 | phnJ | carbon-phosphorus lyase, SAM-dependent                                                    | -0.1329 | 0.0066 |
| JW4060 | phnI | ribophosphonate triphosphate synthase complex putative catalytic subunit                  | -0.0220 | 0.1169 |
| JW4061 | phnH | ribophosphonate triphosphate synthase subunit                                             | -0.0096 | 0.7488 |
| JW4062 | phnG | ribophosphonate triphosphate synthase subunit                                             | -0.1133 | 0.0005 |
| JW4063 | phnF | putative DNA-binding transcriptional regulator of phosphonate uptake and biodegradation   | 0.0349  | 0.1366 |
| JW4064 | phnE | defective phosphonate ABC transporter permease                                            | -0.0266 | 0.0833 |
| JW4065 | phnE | Putative cryptic phosphonate transport system permease protein PhnE2                      | 0.0100  | 0.6197 |
| JW4066 | phnD | phosphonate ABC transporter periplasmic binding protein                                   | 0.0655  | 0.0198 |
| JW4067 | phnC | phosphonate ABC transporter ATPase                                                        | -0.1184 | 0.0185 |

|        |      |                                                                                                                    |         |        |
|--------|------|--------------------------------------------------------------------------------------------------------------------|---------|--------|
| JW4068 | phnB | metalloprotein superfamily protein                                                                                 | -0.0488 | 0.0156 |
| JW4069 | phnA | zinc-ribbon family protein                                                                                         | 0.0453  | 0.0025 |
| JW4070 | yjdA | clamp-binding sister replication fork colocalization protein, dynamin-related                                      | 0.2562  | 0.0017 |
| JW4072 | proP | proline/glycine betaine transporter                                                                                | 0.0067  | 0.7755 |
| JW4073 | basS | sensory histidine kinase in two-component regulatory system with BasR                                              | 0.1020  | 0.0000 |
| JW4074 | basR | response regulator in two-component regulatory system with BasS                                                    | 0.0324  | 0.1339 |
| JW4076 | adiC | arginine:agmatine antiporter                                                                                       | 0.0286  | 0.3353 |
| JW4077 | adiY | adi system transcriptional activator                                                                               | 0.0107  | 0.6858 |
| JW4079 | melR | melibiose operon transcriptional regulator; autoregulator                                                          | -0.0051 | 0.7454 |
| JW4080 | melA | alpha-galactosidase, NAD(P)-binding                                                                                | 0.0615  | 0.1831 |
| JW4081 | melB | melibiose:sodium symporter                                                                                         | 0.1118  | 0.1120 |
| JW4082 | yjdF | DUF2238 family inner membrane protein                                                                              | -0.0721 | 0.0142 |
| JW4083 | fumB | anaerobic class I fumarate hydratase (fumarase B)                                                                  | -0.0827 | 0.0001 |
| JW4084 | dcuB | C4-dicarboxylate transporter, anaerobic; DcuS co-sensor                                                            | -0.0881 | 0.0167 |
| JW4085 | dcuR | response regulator in two-component regulatory system with DcuS                                                    | -0.0110 | 0.6627 |
| JW4086 | dcuS | sensory histidine kinase in two-component regulatory system with DcuR, regulator of anaerobic fumarate respiration | -0.0184 | 0.3325 |
| JW4087 | yjdI | putative 4Fe-4S mono-cluster protein                                                                               | -0.0204 | 0.4668 |
| JW4088 | yjdJ | GNAT family putative N-acetyltransferase                                                                           | 0.0560  | 0.0305 |
| JW4089 | yjdK | antitoxin of GhoTS toxin-antitoxin pair; endonuclease for ghoT mRNA                                                | -0.0227 | 0.4430 |
| JW4090 | lysU | lysine tRNA synthetase, inducible                                                                                  | -0.0620 | 0.0700 |
| JW4091 | yjdL | dipeptide and tripeptide permease                                                                                  | 0.0351  | 0.3245 |
| JW4092 | cadA | lysine decarboxylase, acid-inducible                                                                               | -0.2249 | 0.1350 |
| JW4093 | cadB | putative lysine/cadaverine transporter                                                                             | 0.0206  | 0.5872 |
| JW4094 | cadC | cadBA operon transcriptional activator                                                                             | -0.0315 | 0.3259 |
| JW4097 | cutA | divalent-cation tolerance protein, copper sensitivity                                                              | 0.1432  | 0.1481 |
| JW4099 | aspA | aspartate ammonia-lyase                                                                                            | 0.0219  | 0.2787 |
| JW4100 | fxsA | suppressor of F exclusion of phage T7                                                                              | 0.0443  | 0.3570 |
| JW4101 | yjeH | L-methionine and branched chain amino acid exporter                                                                | 0.0143  | 0.3997 |
| JW4103 | groL | Cpn60 chaperonin GroEL, large subunit of GroESL                                                                    | -0.0812 | 0.0491 |
| JW4106 | yjeK | EF-P-Lys34 lysylation protein; weak lysine 2,3-aminomutase                                                         | -0.0072 | 0.8103 |
| JW4107 | efp  | polyproline-specific translation elongation factor EF-P                                                            | -0.0543 | 0.3546 |

|        |      |                                                                                                                                                             |         |        |
|--------|------|-------------------------------------------------------------------------------------------------------------------------------------------------------------|---------|--------|
| JW4108 | ecnB | entericidin B membrane lipoprotein                                                                                                                          | 0.1443  | 0.0005 |
| JW4110 | blc  | outer membrane lipoprotein cell division and growth lipocalin                                                                                               | -0.0983 | 0.0618 |
| JW4111 | ampC | penicillin-binding protein; beta-lactamase, intrinsically weak                                                                                              | 0.0545  | 0.0218 |
| JW4112 | frdD | fumarate reductase (anaerobic), membrane anchor subunit                                                                                                     | 0.0239  | 0.2464 |
| JW4113 | frdC | fumarate reductase (anaerobic), membrane anchor subunit                                                                                                     | 0.1076  | 0.0983 |
| JW4114 | frdB | fumarate reductase (anaerobic), Fe-S subunit                                                                                                                | 0.0218  | 0.6479 |
| JW4115 | frdA | anaerobic fumarate reductase catalytic and NAD/ flavoprotein subunit                                                                                        | -0.0389 | 0.3884 |
| JW4116 | poxA | Elongation Factor P Lys34 lysyltransferase                                                                                                                  | 0.1730  | 0.1141 |
| JW4118 | yjeN | uncharacterized protein                                                                                                                                     | 0.0754  | 0.0472 |
| JW4119 | yjeO | inner membrane protein                                                                                                                                      | -0.0182 | 0.6790 |
| JW4120 | yjeP | mechanosensitive channel protein, miniconductance                                                                                                           | -0.0538 | 0.0068 |
| JW4122 | rsgA | ribosome small subunit-dependent GTPase A                                                                                                                   | 0.0601  | 0.1688 |
| JW4124 | yjeS | epoxyqueuosine reductase, cobalamine-stimulated; queosine biosynthesis                                                                                      | -0.0341 | 0.1559 |
| JW4125 | yjeF | bifunctional NAD(P)H-hydrate repair enzyme; C-terminal domain ADP-dependent (S)-NAD(P)H-hydrate dehydratase and N-terminal domain NAD(P)H-hydrate epimerase | -0.0619 | 0.0227 |
| JW4127 | amiB | N-acetylmuramoyl-l-alanine amidase II                                                                                                                       | -0.1819 | 0.0010 |
| JW4128 | mutL | methyl-directed mismatch repair protein                                                                                                                     | -0.1658 | 0.0026 |
| JW4129 | miaA | delta(2)-isopentenylpyrophosphate tRNA-adenosine transferase                                                                                                | 0.0214  | 0.4846 |
| JW4130 | hfq  | global sRNA chaperone; HF-I, host factor for RNA phage Q beta replication                                                                                   | 0.0734  | 0.0001 |
| JW4131 | hflX | GTPase, stimulated by 50S subunit binding; Mn(2+) homeostasis regulator                                                                                     | -0.0430 | 0.2341 |
| JW4132 | hflK | modulator for HflB protease specific for phage lambda cII repressor                                                                                         | 0.0518  | 0.2704 |
| JW4133 | hflC | HflB protease modulator specific for phage lambda cII repressor                                                                                             | 0.0505  | 0.3469 |
| JW4134 | yjeT | DUF2065 family protein                                                                                                                                      | 0.0937  | 0.0126 |
| JW4135 | purA | adenylosuccinate synthetase                                                                                                                                 | 0.0376  | 0.1433 |
| JW4136 | yjeB | nitric oxide-sensitive repressor for NO regulon                                                                                                             | -0.0382 | 0.2774 |
| JW4139 | yjfl | DUF2170 family protein                                                                                                                                      | 0.0039  | 0.8655 |
| JW4140 | yjff | PspA/IM30 family protein                                                                                                                                    | 0.0347  | 0.2007 |

|        |      |                                                                                      |         |        |
|--------|------|--------------------------------------------------------------------------------------|---------|--------|
| JW4141 | yjfK | DUF2491 family protein                                                               | 0.0022  | 0.9768 |
| JW4142 | yjfL | UPF0719 family inner membrane protein                                                | -0.0275 | 0.3226 |
| JW4143 | yjfM | DUF1190 family protein                                                               | -0.0607 | 0.0003 |
| JW4144 | yjfC | ATP-Grasp family ATPase                                                              | 0.1050  | 0.0129 |
| JW4148 | yjfP | acyl CoA esterase                                                                    | -0.1375 | 0.0270 |
| JW4149 | ulaR | transcriptional repressor for the L-ascorbate utilization divergent operon           | -0.2324 | 0.2721 |
| JW4152 | ulaB | L-ascorbate-specific enzyme IIB component of PTS                                     | 0.0130  | 0.8562 |
| JW4153 | ulaC | L-ascorbate-specific enzyme IIA component of PTS                                     | -0.0219 | 0.4040 |
| JW4154 | ulaD | 3-keto-L-gulonate 6-phosphate decarboxylase                                          | 0.1350  | 0.0014 |
| JW4155 | ulaE | L-xylulose 5-phosphate 3-epimerase                                                   | 0.0819  | 0.1145 |
| JW4156 | ulaF | L-ribulose 5-phosphate 4-epimerase                                                   | 0.0980  | 0.0026 |
| JW4157 | yjfY | YhcN family protein, periplasmic                                                     | -0.4733 | 0.0015 |
| JW4158 | rpsF | 30S ribosomal subunit protein S6                                                     | -0.1205 | 0.1096 |
| JW4159 | priB | primosomal protein N                                                                 | 0.0243  | 0.2086 |
| JW4161 | rplI | 50S ribosomal subunit protein L9                                                     | -0.2102 | 0.0002 |
| JW4162 | yjfZ | uncharacterized protein                                                              | 0.1611  | 0.0407 |
| JW4163 | ytfA | pseudogene, related to transcriptional regulators                                    | -0.0197 | 0.2677 |
| JW4166 | cycA | D-alanine/D-serine/glycine transporter                                               | -0.0520 | 0.1373 |
| JW4167 | ytfE | iron-sulfur cluster repair protein RIC                                               | 0.0676  | 0.1233 |
| JW4168 | ytfF | DMT transporter family inner membrane protein                                        | -0.0012 | 0.9629 |
| JW4169 | ytfG | NAD(P)H:quinone oxidoreductase                                                       | -0.4926 | 0.0006 |
| JW4171 | cpdB | 2':3'-cyclic-nucleotide 2'-phosphodiesterase                                         | 0.0088  | 0.7678 |
| JW4172 | cysQ | 3'(2'),5'-bisphosphate nucleotidase                                                  | 0.1905  | 0.0079 |
| JW4175 | ytfJ | putative transcriptional regulator                                                   | -0.2525 | 0.0000 |
| JW4177 | ytfL | UPF0053 family inner membrane protein                                                | -0.0305 | 0.4735 |
| JW4178 | msrA | methionine sulfoxide reductase A                                                     | -0.0462 | 0.2025 |
| JW4179 | ytfM | translocation and assembly module for autotransporter export, outer membrane subunit | -0.1531 | 0.1718 |
| JW4180 | ytfN | translocation and assembly module for autotransporter export, inner membrane subunit | -0.0401 | 0.8273 |
| JW4181 | ytfP | GGCT-like protein                                                                    | 0.1627  | 0.3377 |
| JW4182 | yzfA | Putative uncharacterized protein b4223                                               | 0.0920  | 0.1508 |
| JW4184 | chpB | toxin of the ChpB-ChpS toxin-antitoxin system                                        | 0.0931  | 0.0269 |
| JW4186 | ytfQ | galactofuranose ABC transporter periplasmic binding protein                          | 0.1802  | 0.1997 |
| JW4191 | fbp  | fructose-1,6-bisphosphatase I                                                        | -0.0208 | 0.2967 |
| JW4192 | mpl  | UDP-N-acetylmuramate:L-alanyl-gamma-D-glutamyl-meso-diaminopimelate ligase           | 0.0201  | 0.5922 |
| JW4193 | yjgA | ribosome-associated UPF0307 family protein                                           | -0.2700 | 0.0359 |

|        |      |                                                                                                                      |         |        |
|--------|------|----------------------------------------------------------------------------------------------------------------------|---------|--------|
| JW4194 | pmbA | putative antibiotic peptide MccB17 maturation peptidase                                                              | 0.1150  | 0.0054 |
| JW4195 | cybC | pseudogene, truncated cytochrome b562                                                                                | -0.0094 | 0.6538 |
| JW4196 | nrdG | anaerobic ribonucleotide reductase activating protein                                                                | -0.0067 | 0.7174 |
| JW4197 | nrdD | anaerobic ribonucleoside-triphosphate reductase                                                                      | -0.0578 | 0.0812 |
| JW4198 | treC | trehalose-6-P hydrolase                                                                                              | 0.0370  | 0.4780 |
| JW4200 | treR | trehalose 6-phosphate-inducible trehalose regulon transcriptional repressor                                          | 0.0273  | 0.4323 |
| JW4201 | mgtA | magnesium transporter                                                                                                | -0.0972 | 0.0011 |
| JW4203 | pyrI | aspartate carbamoyltransferase, regulatory subunit                                                                   | 0.0490  | 0.0029 |
| JW4204 | pyrB | aspartate carbamoyltransferase, catalytic subunit                                                                    | 0.0275  | 0.4760 |
| JW4205 | pyrL | pyrBI operon leader peptide                                                                                          | -0.2200 | 0.0453 |
| JW4206 | yjgH | UPF0131 family protein                                                                                               | 0.0603  | 0.0498 |
| JW4207 | yjgI | c-di-GMP-binding biofilm dispersal mediator protein                                                                  | -0.1707 | 0.1406 |
| JW4208 | yjgJ | transcriptional repressor for divergent bdcA                                                                         | -0.0107 | 0.8495 |
| JW4211 | argI | ornithine carbamoyltransferase 1                                                                                     | 0.0471  | 0.0001 |
| JW4212 | yjgD | protein inhibitor of RNase E                                                                                         | -0.4522 | 0.0024 |
| JW4216 | holC | DNA polymerase III, chi subunit                                                                                      | 0.0484  | 0.1066 |
| JW4217 | pepA | multifunctional aminopeptidase A: a cyteinyglycinase, transcription regulator and site-specific recombination factor | 0.0728  | 0.1350 |
| JW4220 | yjgR | DUF853 family protein with NTPase fold                                                                               | -0.0242 | 0.8872 |
| JW4221 | idnR | transcriptional repressor, 5-gluconate-binding                                                                       | -0.0078 | 0.4805 |
| JW4222 | idnT | L-idonate and D-gluconate transporter                                                                                | 0.0330  | 0.3099 |
| JW4223 | idnO | 5-keto-D-gluconate-5-reductase                                                                                       | 0.0687  | 0.0213 |
| JW4224 | idnD | L-idonate 5-dehydrogenase, NAD-binding                                                                               | 0.0500  | 0.2353 |
| JW4225 | idnK | D-gluconate kinase, thermosensitive                                                                                  | 0.0519  | 0.2180 |
| JW4227 | intB | pseudogene, integrase homology                                                                                       | -0.0405 | 0.0967 |
| JW4233 | yjgW | Putative uncharacterized protein                                                                                     | -0.0341 | 0.2565 |
| JW4234 | yjgX | Putative uncharacterized protein                                                                                     | 0.0069  | 0.7928 |
| JW4236 | yjgZ | uncharacterized protein                                                                                              | -0.0212 | 0.3792 |
| JW4242 | yjhE | pseudogene, KpLE2 phage-like element                                                                                 | -0.0398 | 0.2503 |
| JW4246 | yjhV | pseudogene, KpLE2 phage-like element                                                                                 | -0.0538 | 0.6143 |
| JW4247 | fecE | ferric citrate ABC transporter ATPase                                                                                | -0.0734 | 0.0344 |
| JW4248 | fecD | ferric citrate ABC transporter permease                                                                              | 0.0285  | 0.4260 |
| JW4249 | fecC | ferric citrate ABC transporter permease                                                                              | -0.0457 | 0.3512 |
| JW4250 | fecB | ferric citrate ABC transporter periplasmic binding protein                                                           | 0.0804  | 0.0031 |



|        |      |                                                                                                                                                                       |         |        |
|--------|------|-----------------------------------------------------------------------------------------------------------------------------------------------------------------------|---------|--------|
| JW4251 | fecA | TonB-dependent outer membrane ferric citrate transporter and signal transducer; ferric citrate extracellular receptor; FecR-interacting protein                       | -0.1459 | 0.0156 |
| JW4252 | fecR | anti-sigma transmembrane signal transducer for ferric citrate transport; periplasmic FecA-bound ferric citrate sensor and cytoplasmic FecI ECF sigma factor activator | 0.0238  | 0.3985 |
| JW4253 | fecI | RNA polymerase sigma-19 factor, fec operon-specific; ECF sigma factor                                                                                                 | 0.0188  | 0.6023 |
| JW4258 | yjhF | putative transporter                                                                                                                                                  | 0.1445  | 0.1466 |
| JW4259 | yjhG | putative dehydratase                                                                                                                                                  | 0.3226  | 0.0054 |
| JW4261 | yjhI | putative DNA-binding transcriptional regulator                                                                                                                        | 0.0289  | 0.3476 |
| JW4262 | sgcR | putative DNA-binding transcriptional regulator                                                                                                                        | -0.0242 | 0.2080 |
| JW4263 | sgcE | putative epimerase                                                                                                                                                    | -0.0477 | 0.0132 |
| JW4264 | sgcA | putative phosphotransferase enzyme IIA component                                                                                                                      | 0.1048  | 0.0038 |
| JW4265 | sgcQ | putative nucleoside triphosphatase                                                                                                                                    | 0.0656  | 0.1304 |
| JW4266 | sgcC | putative PTS system EIIC permease component                                                                                                                           | 0.1094  | 0.0001 |
| JW4268 | yjhP | putative methyltransferase                                                                                                                                            | -0.1243 | 0.0075 |
| JW4269 | yjhQ | GNAT family putative N-acetyltransferase                                                                                                                              | -0.0518 | 0.0517 |
| JW4271 | yjhR | pseudogene, helicase family                                                                                                                                           | 0.2269  | 0.1958 |
| JW4272 | yjhS | 9-O-acetyl N-acetylneuraminic acid esterase                                                                                                                           | -0.0243 | 0.1039 |
| JW4275 | fimB | tyrosine recombinase/inversion of on/off regulator of fimA                                                                                                            | 0.0652  | 0.0612 |
| JW4277 | fimA | major type 1 subunit fimbrin (pilin)                                                                                                                                  | -0.0139 | 0.6349 |
| JW4279 | fimC | periplasmic chaperone                                                                                                                                                 | 0.0005  | 0.9940 |
| JW4281 | fimF | minor component of type 1 fimbriae                                                                                                                                    | -0.0370 | 0.1984 |
| JW4282 | fimG | minor component of type 1 fimbriae                                                                                                                                    | -0.0414 | 0.0220 |
| JW4283 | fimH | minor component of type 1 fimbriae                                                                                                                                    | -0.0215 | 0.8044 |
| JW4284 | gntP | fructuronate transporter                                                                                                                                              | 0.0440  | 0.0552 |
| JW4285 | uxuA | mannonate hydrolase                                                                                                                                                   | 0.0645  | 0.1524 |
| JW4286 | uxuB | D-mannonate oxidoreductase, NAD-dependent                                                                                                                             | -0.0113 | 0.4224 |
| JW4287 | uxuR | fructuronate-inducible hexuronate regulon transcriptional repressor; autorepressor                                                                                    | -0.0225 | 0.0727 |
| JW4288 | yjiC | uncharacterized protein                                                                                                                                               | -0.1219 | 0.3702 |
| JW4290 | yjiE | hypochlorite-responsive transcription factor                                                                                                                          | -0.0043 | 0.9059 |
| JW4291 | iadA | isoaspartyl dipeptidase                                                                                                                                               | -0.1755 | 0.0020 |
| JW4292 | yjiG | SpmB family inner membrane protein                                                                                                                                    | -0.4030 | 0.0028 |
| JW4295 | yjiJ | DUF1228 family putative inner membrane MFS superfamily transporter                                                                                                    | 0.0628  | 0.0018 |

|        |      |                                                                                 |         |        |
|--------|------|---------------------------------------------------------------------------------|---------|--------|
| JW4299 | yjiN | zinc-type alcohol dehydrogenase-like protein                                    | 0.1362  | 0.0001 |
| JW4300 | yjiO | multidrug efflux system protein                                                 | -0.0906 | 0.0008 |
| JW4302 | yjiQ | Putative inactive recombination-promoting nuclease-like protein                 | 0.0117  | 0.6508 |
| JW4303 | yjiR | putative DNA-binding transcriptional regulator/putative aminotransferase        | 0.1605  | 0.0009 |
| JW4304 | yjiS | DUF1127 family protein                                                          | -0.2022 | 0.3157 |
| JW4310 | yjiW | toxic peptide regulated by antisense sRNA symR                                  | 0.0228  | 0.5049 |
| JW4311 | hsdS | specificity determinant for hsdM and hsdR                                       | -0.2372 | 0.0121 |
| JW4312 | hsdM | DNA methyltransferase M                                                         | -0.0950 | 0.0897 |
| JW4313 | hsdR | endonuclease R Type I restriction enzyme                                        | -0.0018 | 0.9258 |
| JW4314 | mrr  | methylated adenine and cytosine restriction protein                             | 0.2785  | 0.0634 |
| JW4316 | yjiX | DUF466 family protein                                                           | -0.3353 | 0.0251 |
| JW4318 | tsr  | methyl-accepting chemotaxis protein I, serine sensor receptor                   | 0.0344  | 0.1160 |
| JW4319 | yjiZ | putative L-galactonate:H <sup>+</sup> symporter                                 | -0.0039 | 0.8544 |
| JW4326 | dnaT | DNA biosynthesis protein (primosomal protein I)                                 | 0.1234  | 0.0026 |
| JW4327 | yjjB | DUF3815 family inner membrane protein                                           | 0.0881  | 0.0071 |
| JW4329 | yjjQ | putative transcriptional regulator                                              | -0.1857 | 0.2493 |
| JW4331 | fhuF | ferric iron reductase involved in ferric hydroximate transport                  | 0.0903  | 0.0868 |
| JW4333 | rsmC | 16S rRNA m(2)G1207 methyltransferase, SAM-dependent                             | -0.1423 | 0.0019 |
| JW4334 | holD | DNA polymerase III, psi subunit                                                 | 0.0973  | 0.2152 |
| JW4335 | rimI | ribosomal-protein-S18-alanine N-acetyltransferase                               | -0.0744 | 0.0278 |
| JW4336 | yjjG | dUMP phosphatase                                                                | -0.2930 | 0.0726 |
| JW4338 | osmY | salt-inducible putative ABC transporter periplasmic binding protein             | -0.0984 | 0.0172 |
| JW4340 | yjjU | putative patatin-like family phospholipase                                      | 0.0650  | 0.0209 |
| JW4341 | yjjV | putative DNase                                                                  | -0.0077 | 0.7773 |
| JW4342 | yjjW | putative pyruvate formate lyase activating enzyme                               | 0.1328  | 0.1701 |
| JW4343 | yjjI | DUF3029 family protein, putative glycine radical enzyme                         | 0.2695  | 0.0000 |
| JW4344 | deoC | 2-deoxyribose-5-phosphate aldolase, NAD(P)-linked                               | -0.0257 | 0.6535 |
| JW4345 | deoA | thymidine phosphorylase                                                         | 0.0765  | 0.0348 |
| JW4346 | deoB | phosphopentomutase                                                              | -0.0665 | 0.0494 |
| JW4347 | deoD | purine nucleoside phosphorylase 1; nicotinamide 1-beta-D-riboside phosphorylase | -0.0232 | 0.5024 |

|        |      |                                                                               |         |        |
|--------|------|-------------------------------------------------------------------------------|---------|--------|
| JW4348 | yjJ  | putative protein kinase                                                       | 0.0720  | 0.0844 |
| JW4349 | lplA | lipoate-protein ligase A                                                      | -0.0466 | 0.3636 |
| JW4350 | ytjB | SMP_2 family putative membrane-anchored periplasmic protein                   | -0.0090 | 0.7781 |
| JW4351 | serB | 3-phosphoserine phosphatase                                                   | 0.1341  | 0.0081 |
| JW4352 | radA | DNA repair protein                                                            | 0.0042  | 0.9628 |
| JW4354 | yjK  | energy-dependent translational throttle A                                     | 0.4212  | 0.0103 |
| JW4355 | slt  | lytic murein transglycosylase, soluble                                        | 0.0712  | 0.0456 |
| JW4356 | trpR | transcriptional repressor, tryptophan-binding                                 | -0.1192 | 0.0019 |
| JW4358 | ytjC | phosphatase                                                                   | 0.0074  | 0.8471 |
| JW4359 | rob  | right oriC-binding transcriptional activator, AraC family                     | 0.0060  | 0.9081 |
| JW4360 | creA | putative periplasmic protein                                                  | 0.1056  | 0.0000 |
| JW4361 | creB | response regulator in two-component regulatory system with CreC               | -0.0780 | 0.0001 |
| JW4362 | creC | sensory histidine kinase in two-component regulatory system with CreB or PhoB | -0.0137 | 0.1019 |
| JW4364 | arcA | response regulator in two-component regulatory system with ArcB or CpxA       | 0.1183  | 0.1979 |
| JW4365 | yjY  | uncharacterized protein                                                       | -0.3921 | 0.0070 |
| JW4366 | yjD  | putative methyltransferase                                                    | 0.2488  | 0.0193 |
| JW4367 | thrL | thr operon leader peptide                                                     | -0.0924 | 0.0001 |
| JW5001 | htgA | Uncharacterized protein                                                       | 0.0405  | 0.1823 |
| JW5002 | hokC | Toxic protein HokC                                                            | -0.0968 | 0.0023 |
| JW5003 | yaaY | uncharacterized protein                                                       | -0.0995 | 0.0090 |
| JW5004 | caiE | stimulator of CaiD and CaiB enzyme activities                                 | -0.0022 | 0.8914 |
| JW5005 | yabI | ionizing radiation survival protein; DedA family inner membrane protein       | -0.0128 | 0.6782 |
| JW5008 | yacG | DNA gyrase inhibitor                                                          | 0.0558  | 0.0148 |
| JW5009 | hpt  | hypoxanthine phosphoribosyltransferase                                        | -0.0239 | 0.0237 |
| JW5011 | ligT | 2'-5' RNA ligase                                                              | 0.0688  | 0.0254 |
| JW5012 | clcA | H(+)/Cl(-) exchange transporter                                               | -0.3346 | 0.0226 |
| JW5013 | cdaR | carbohydrate diacid regulon transcriptional regulator; autoregulator          | -0.2759 | 0.0803 |
| JW5014 | yaeI | phosphodiesterase with model substrate bis-pNPP                               | -0.0734 | 0.3659 |
| JW5016 | yaeF | putative lipoprotein                                                          | 0.0292  | 0.2046 |
| JW5017 | yafD | endo/exonuclease/phosphatase family protein                                   | 0.0365  | 0.3139 |
| JW5018 | mltD | putative membrane-bound lytic murein transglycosylase D                       | 0.0780  | 0.0056 |
| JW5019 | yafV | putative NAD(P)-binding C-N hydrolase family amidase                          | 0.0139  | 0.5396 |
| JW5020 | fadE | acyl coenzyme A dehydrogenase                                                 | 0.0516  | 0.0902 |

|        |      |                                                                                                                          |         |        |
|--------|------|--------------------------------------------------------------------------------------------------------------------------|---------|--------|
| JW5022 | yafX | CP4-6 prophage; uncharacterized protein                                                                                  | 0.0223  | 0.5818 |
| JW5023 | ykfF | CP4-6 prophage; uncharacterized protein                                                                                  | 0.0122  | 0.6933 |
| JW5027 | mmuP | CP4-6 prophage; putative S-methylmethionine transporter                                                                  | 0.0352  | 0.0156 |
| JW5030 | yagV | ECP production pilus chaperone                                                                                           | 0.0492  | 0.1152 |
| JW5031 | ykgK | putative transcriptional regulator for the ecp operon                                                                    | 0.0173  | 0.3899 |
| JW5033 | ykgL | uncharacterized protein                                                                                                  | 0.0100  | 0.3456 |
| JW5034 | ykgM | RpmJ-like protein                                                                                                        | -0.0394 | 0.0572 |
| JW5035 | ykgM | 50S ribosomal protein L31 type B; alternative zinc-limitation L31 protein                                                | -0.0549 | 0.0027 |
| JW5037 | ykgA | pseudogene, AraC family                                                                                                  | 0.0550  | 0.0642 |
| JW5038 | ykgB | reactive chlorine species (RCS) stress resistance inner membrane protein                                                 | 0.0380  | 0.0660 |
| JW5039 | ykgI | reactive chlorine species (RCS) stress resistance periplasmic protein                                                    | 0.0094  | 0.4234 |
| JW5040 | ykgC | reactive chlorine stress species (RCS) resistance protein; pyridine nucleotide-dependent disulfide oxidoreductase family | 0.0639  | 0.0187 |
| JW5041 | ykgE | cysteine-rich LutA family protein; putative electron transport chain YkgEFG component                                    | -0.0679 | 0.0001 |
| JW5042 | ykgG | LutC family protein; putative electron transport chain YkgEFG component                                                  | 0.0412  | 0.0083 |
| JW5044 | yahM | uncharacterized protein                                                                                                  | 0.0328  | 0.1562 |
| JW5046 | mhpT | 3-hydroxyphenylpropionic transporter                                                                                     | 0.0022  | 0.9107 |
| JW5049 | ykiB | Uncharacterized protein                                                                                                  | 0.0147  | 0.5835 |
| JW5051 | yaiU | Uncharacterized protein                                                                                                  | 0.0870  | 0.0002 |
| JW5052 | ampH | D-alanyl-D-alanine-carboxypeptidase/endopeptidase; penicillin-binding protein; weak beta-lactamase                       | 0.0244  | 0.0508 |
| JW5053 | yaiZ | DUF2754 family putative inner membrane protein                                                                           | 0.0660  | 0.0365 |
| JW5054 | psiF | PsiF family protein                                                                                                      | 0.0196  | 0.5100 |
| JW5055 | proY | proline-specific permease                                                                                                | -0.0106 | 0.5444 |
| JW5056 | yajI | putative lipoprotein                                                                                                     | 0.0687  | 0.0138 |
| JW5057 | yajL | oxidative-stress-resistance chaperone                                                                                    | -0.1063 | 0.0149 |
| JW5058 | yajQ | phage Phi6 host factor, ATP/GTP binding protein                                                                          | 0.0658  | 0.0936 |
| JW5059 | yajR | putative transporter                                                                                                     | 0.0415  | 0.0238 |
| JW5060 | bolA | stationary-phase morphogene, transcriptional repressor for mreB; also regulator for dacA, dacC, and ampC                 | -0.1315 | 0.0054 |
| JW5061 | mdlB | putative multidrug ABC transporter ATPase                                                                                | -0.0161 | 0.5244 |
| JW5062 | ylaB | putative membrane-anchored cyclic-di-GMP phosphodiesterase                                                               | -0.0150 | 0.5285 |
| JW5063 | ylaC | DUF1449 family inner membrane protein                                                                                    | -0.0571 | 0.0235 |

|        |      |                                                                              |         |        |
|--------|------|------------------------------------------------------------------------------|---------|--------|
| JW5065 | ybbJ | inner membrane protein; stimulator of the QmcA suppressor of ftsH-htpX       | 0.1017  | 0.0135 |
| JW5066 | ybbM | iron export ABC transporter permease; peroxide resistance protein            | -0.1216 | 0.0086 |
| JW5067 | ybbN | DnaK co-chaperone, thioredoxin-like protein                                  | -0.0353 | 0.3053 |
| JW5070 | ybcJ | ribosome-associated protein; putative RNA-binding protein                    | 0.0436  | 0.1855 |
| JW5071 | sfmH | FimA homolog, function unknown                                               | 0.0396  | 0.3859 |
| JW5072 | sfmF | FimA homolog, function unknown                                               | 0.0210  | 0.3100 |
| JW5073 | fimZ | response regulator family protein                                            | 0.1139  | 0.0110 |
| JW5076 | ylcG | uncharacterized protein, DLP12 prophage                                      | 0.0954  | 0.0269 |
| JW5079 | rzpD | DLP12 prophage; putative murein endopeptidase                                | 0.1978  | 0.0014 |
| JW5080 | rzoD | DLP12 prophage; putative lipoprotein                                         | 0.0987  | 0.0135 |
| JW5081 | ybcV | DLP12 prophage; DUF1398 family protein                                       | -0.0640 | 0.0182 |
| JW5082 | cusS | copper-sensing histidine kinase in two-component regulatory system with CusR | -0.0241 | 0.0635 |
| JW5083 | ybdF | DUF419 family protein                                                        | 0.0191  | 0.2516 |
| JW5084 | hokE | toxic polypeptide, small                                                     | -0.1768 | 0.1328 |
| JW5086 | fepA | ferrienterobactin outer membrane transporter                                 | -0.2240 | 0.0002 |
| JW5087 | citF | citrate lyase, citrate-ACP transferase (alpha) subunit                       | -0.0347 | 0.1675 |
| JW5089 | lipB | octanoyltransferase; octanoyl-[ACP]:protein N-octanoyltransferase            | 0.1625  | 0.0007 |
| JW5090 | ybeB | ribosomal silencing factor                                                   | 0.0315  | 0.0979 |
| JW5091 | ybeQ | Sel1 family TPR-like repeat protein                                          | -0.0358 | 0.1228 |
| JW5092 | gltI | glutamate/aspartate periplasmic binding protein                              | 0.0044  | 0.8863 |
| JW5094 | ybfG | pseudogene                                                                   | 0.0546  | 0.1660 |
| JW5095 | ybfH | Uncharacterized protein                                                      | -0.3785 | 0.0063 |
| JW5096 | kdpE | response regulator in two-component regulatory system with KdpD              | -0.0904 | 0.0027 |
| JW5097 | abrB | regulator of aidB expression; inner membrane protein                         | 0.0081  | 0.8288 |
| JW5098 | ybgO | putative fimbrial protein                                                    | -0.0285 | 0.3442 |
| JW5099 | ybgQ | putative outer membrane protein                                              | 0.0468  | 0.6002 |
| JW5100 | tolB | periplasmic protein                                                          | -0.2806 | 0.0478 |
| JW5102 | ybhT | AcrAB-TolC efflux pump accessory protein, membrane-associated                | -0.1645 | 0.0424 |
| JW5103 | ybhJ | aconitase family protein                                                     | -0.0104 | 0.5161 |
| JW5104 | ybhF | putative ABC transporter ATPase                                              | 0.0185  | 0.5656 |
| JW5105 | ybiX | Fe(II)-dependent oxygenase superfamily protein                               | -0.3293 | 0.0158 |

|        |      |                                                                                                      |         |        |
|--------|------|------------------------------------------------------------------------------------------------------|---------|--------|
| JW5106 | ybiM | colanic acid mucoidy stimulation protein                                                             | 0.0088  | 0.7685 |
| JW5107 | ybiN | 23S rRNA m(6)A1618 methyltransferase, SAM-dependent                                                  | -0.0068 | 0.7665 |
| JW5108 | ybiO | mechanosensitive channel protein, intermediate conductance                                           | 0.0384  | 0.4697 |
| JW5109 | fsaA | fructose-6-phosphate aldolase 1                                                                      | -0.1360 | 0.2302 |
| JW5112 | ybjG | undecaprenyl pyrophosphate phosphatase                                                               | 0.0515  | 0.0024 |
| JW5113 | ybjI | 5-amino-6-(5-phospho-D-ribitylamino)uracil phosphatase; pyrimidine phosphatase; riboflavin synthesis | 0.0717  | 0.3597 |
| JW5114 | ybjK | transcriptional regulator of csgD and ybiJI; autoregulator                                           | -0.1110 | 0.0000 |
| JW5116 | ybjT | putative NAD-dependent oxidoreductase                                                                | 0.0126  | 0.5495 |
| JW5117 | hcr  | HCP oxidoreductase, NADH-dependent                                                                   | -0.0178 | 0.5868 |
| JW5118 | dmsA | dimethyl sulfoxide reductase, anaerobic, subunit A                                                   | -0.0116 | 0.5052 |
| JW5119 | ycaM | putative transporter                                                                                 | 0.1367  | 0.0248 |
| JW5120 | ycaI | ComEC family inner membrane protein                                                                  | 0.0077  | 0.7868 |
| JW5121 | ssuC | aliphatic sulfonate ABC transporter permease                                                         | 0.0200  | 0.2970 |
| JW5122 | ycbQ | laminin-binding fimbrin subunit                                                                      | -0.0033 | 0.7894 |
| JW5123 | ycbV | putative fimbrial-like adhesin protein                                                               | -0.0358 | 0.5316 |
| JW5124 | ycbF | putative periplasmic pilin chaperone                                                                 | -0.0173 | 0.4748 |
| JW5125 | ycbW | FtsZ stabilizer                                                                                      | -0.0241 | 0.3688 |
| JW5126 | ycbX | 6-N-hydroxylaminopurine detoxification oxidoreductase                                                | -0.0609 | 0.1246 |
| JW5127 | ymbA | OM-anchored periplasmic lipoprotein component of the putative PqiABC transporter, paraquat-inducible | 0.0180  | 0.2497 |
| JW5128 | yccS | putative transporter, FUSC superfamily inner membrane protein                                        | 0.0083  | 0.6826 |
| JW5129 | mgsA | methylglyoxal synthase                                                                               | 0.0686  | 0.0952 |
| JW5130 | yccU | putative CoA-binding protein                                                                         | 0.0406  | 0.0660 |
| JW5131 | yccX | weak acylphosphatase                                                                                 | -0.0157 | 0.7192 |
| JW5132 | etp  | O-antigen capsule forming protein-tyrosine-phosphatase; Etk-P dephosphorylase                        | -0.0428 | 0.6003 |
| JW5133 | ymcD | O-antigen capsule production threonine-rich inner membrane protein                                   | -0.0523 | 0.1710 |
| JW5135 | torS | hybrid sensory histidine kinase in two-component regulatory system with TorR                         | -0.0011 | 0.9773 |
| JW5136 | ymdF | KGG family protein                                                                                   | -0.0659 | 0.1704 |
| JW5137 | ycdG | pyrimidine permease                                                                                  | 0.0280  | 0.1029 |
| JW5138 | ycdH | flavin:NADH reductase                                                                                | 0.0775  | 0.0499 |
| JW5139 | ycdL | ureidoacrylate amidohydrolase                                                                        | -0.0451 | 0.0216 |
| JW5141 | ycdN | Putative inactive ferrous iron permease                                                              | 0.0359  | 0.2927 |

|        |      |                                                                                            |         |        |
|--------|------|--------------------------------------------------------------------------------------------|---------|--------|
| JW5142 | ycdR | poly-beta-1,6-N-acetyl-D-glucosamine (PGA) N-deacetylase outer membrane export lipoprotein | -0.0976 | 0.0119 |
| JW5143 | ycdT | diguanylate cyclase, membrane-anchored                                                     | 0.3162  | 0.0602 |
| JW5145 | ymdE | pseudogene                                                                                 | -0.0646 | 0.0312 |
| JW5146 | ycdW | glyoxylate/hydroxypyruvate reductase A                                                     | 0.0433  | 0.1985 |
| JW5147 | ycdZ | DUF1097 family inner membrane protein                                                      | -0.0183 | 0.7129 |
| JW5150 | ymdC | stationary phase cardiolipin synthase 3                                                    | 0.0141  | 0.2153 |
| JW5151 | yceK | outer membrane integrity lipoprotein                                                       | -0.0057 | 0.8435 |
| JW5152 | yceP | biofilm regulator                                                                          | -0.2638 | 0.0307 |
| JW5153 | flgH | flagellar protein of basal-body outer-membrane L ring                                      | -0.1673 | 0.0002 |
| JW5155 | yceF | m(7)GTP pyrophosphatase                                                                    | -0.0098 | 0.6946 |
| JW5156 | plsX | putative phosphate acyltransferase                                                         | 0.0035  | 0.6825 |
| JW5157 | ycfM | OM lipoprotein stimulator of MrcB transpeptidase                                           | 0.0054  | 0.8209 |
| JW5158 | ycfP | putative UPF0227 family esterase                                                           | 0.0093  | 0.6749 |
| JW5159 | ycfQ | repressor for bhsA(ycfR)                                                                   | -0.1303 | 0.1310 |
| JW5164 | ymfA | DUF3592 family inner membrane protein                                                      | -0.0307 | 0.0596 |
| JW5165 | hflD | putative lysogenization regulator                                                          | 0.0325  | 0.4357 |
| JW5166 | ymfE | e14 prophage; putative inner membrane protein                                              | 0.0866  | 0.0010 |
| JW5168 | ymfI | e14 prophage; uncharacterized protein                                                      | -0.0857 | 0.0961 |
| JW5169 | ymfT | e14 prophage; putative DNA-binding transcriptional regulator                               | -0.1488 | 0.0000 |
| JW5170 | ymfP | pseudogene, e14 prophage                                                                   | 0.0024  | 0.9029 |
| JW5171 | ymfS | e14 prophage; uncharacterized protein                                                      | 0.0117  | 0.6126 |
| JW5172 | stfE | pseudogene, e14 prophage; side tail fiber protein fragment family                          | -0.0954 | 0.0195 |
| JW5173 | icdC | pseudogene, isocitrate dehydrogenase C-terminal gene fragment                              | 0.0823  | 0.0000 |
| JW5174 | ycgG | putative membrane-anchored cyclic-di-GMP phosphodiesterase                                 | 0.0812  | 0.0002 |
| JW5176 | ycgH | Uncharacterized protein                                                                    | -0.0133 | 0.6258 |
| JW5177 | ymgD | periplasmic protein, HdeA structural homolog                                               | -0.0102 | 0.8377 |
| JW5179 | ymgH | Putative uncharacterized protein                                                           | -0.0689 | 0.0580 |
| JW5180 | ycgN | UPF0153 family cysteine cluster protein                                                    | -0.0569 | 0.1076 |
| JW5181 | hlyE | hemolysin E                                                                                | 0.0753  | 0.0023 |
| JW5182 | dsbB | oxidoreductase that catalyzes reoxidation of DsbA protein disulfide isomerase I            | 0.3677  | 0.0797 |
| JW5184 | cvrA | putative cation/proton antiporter                                                          | -0.0049 | 0.9047 |
| JW5186 | dhaL | dihydroxyacetone kinase, C-terminal domain                                                 | -0.0825 | 0.0774 |
| JW5187 | dhaK | dihydroxyacetone kinase, PTS-dependent, dihydroxyacetone-binding subunit                   | 0.0782  | 0.0133 |
| JW5189 | ychM | C4-dicarboxylic acid transporter                                                           | 0.0627  | 0.0083 |

|        |      |                                                                          |         |        |
|--------|------|--------------------------------------------------------------------------|---------|--------|
| JW5195 | tonB | membrane spanning protein in TonB-ExbB-ExbD transport complex            | -0.0642 | 0.1000 |
| JW5196 | yciO | putative RNA binding protein                                             | 0.0372  | 0.3180 |
| JW5197 | yciQ | enhancer of membrane protein expression; putative inner membrane protein | -0.0541 | 0.0453 |
| JW5199 | yciX | Uncharacterized protein                                                  | -0.0050 | 0.8659 |
| JW5200 | yciW | putative oxidoreductase                                                  | 0.1572  | 0.0001 |
| JW5201 | puuA | glutamate--putrescine ligase                                             | 0.0242  | 0.3685 |
| JW5202 | ycjR | putative TIM alpha/beta barrel enzyme                                    | 0.0961  | 0.0390 |
| JW5203 | ymjB | Putative uncharacterized ABC transporter ATP-binding protein             | 0.0406  | 0.0970 |
| JW5206 | ydaM | diguanylate cyclase, csgD regulator                                      | -0.0378 | 0.1018 |
| JW5207 | ydaQ | Rac prophage; conserved protein                                          | -0.0322 | 0.4710 |
| JW5208 | lar  | Rac prophage; restriction alleviation protein                            | -0.0413 | 0.1248 |
| JW5209 | sieB | phage superinfection exclusion protein, Rac prophage                     | 0.0559  | 0.0031 |
| JW5211 | ydaW | Rac prophage; pseudogene, DNA-binding protein family                     | -0.0378 | 0.0865 |
| JW5212 | rzpR | pseudogene, Rac prophage; Bacteriophage Rz lysis protein family          | -0.0078 | 0.8898 |
| JW5213 | rzoR | Rac prophage; putative lipoprotein                                       | 0.0875  | 0.0114 |
| JW5215 | ydbJ | DUF333 family putative lipoprotein                                       | 0.0873  | 0.0107 |
| JW5216 | ydbL | DUF1318 family protein                                                   | 0.0039  | 0.9301 |
| JW5217 | paaD | ring 1,2-phenylacetyl-CoA epoxidase subunit                              | 0.0440  | 0.1344 |
| JW5221 | ydbD | DUF2773 family methylglyoxal resistance protein                          | -0.1216 | 0.1558 |
| JW5224 | cybB | cytochrome b561                                                          | 0.0706  | 0.0117 |
| JW5225 | hokB | toxic polypeptide, small                                                 | 0.0367  | 0.2885 |
| JW5226 | ydcI | putative DNA-binding transcriptional regulator                           | -0.0611 | 0.0182 |
| JW5227 | yncK | Putative transposase                                                     | 0.0159  | 0.1271 |
| JW5228 | ydcM | IS609 transposase B                                                      | 0.0126  | 0.7603 |
| JW5229 | ydcO | BenE family inner membrane putative transporter                          | -0.0464 | 0.3655 |
| JW5230 | yncN | mRNA interferase toxin of the HicAB toxin-antitoxin system               | 0.0400  | 0.1542 |
| JW5232 | ydcX | DUF2566 family protein                                                   | -0.0029 | 0.8815 |
| JW5233 | yncA | methionine N-acyltransferase; L-amino acid N-acyltransferase             | 0.1134  | 0.0131 |
| JW5234 | ansP | L-asparagine transporter                                                 | -0.0023 | 0.8599 |
| JW5235 | yncH | IPR020099 family protein                                                 | 0.0186  | 0.3000 |
| JW5237 | yncM | Putative transposase                                                     | 0.0247  | 0.4219 |
| JW5238 | sfcA | malate dehydrogenase, decarboxylating, NAD-requiring; malic enzyme       | -0.0520 | 0.2387 |
| JW5239 | bdm  | biofilm-dependent modulation protein                                     | -0.0469 | 0.0228 |
| JW5240 | ddpA | D,D-dipeptide ABC transporter periplasmic binding protein                | -0.0654 | 0.1858 |



|        |      |                                                                                                                                 |         |        |
|--------|------|---------------------------------------------------------------------------------------------------------------------------------|---------|--------|
| JW5241 | yddV | diguanylate cyclase, cold- and stationary phase-induced oxygen-dependent biofilm regulator                                      | 0.0638  | 0.0788 |
| JW5242 | yddA | putative multidrug ABC transporter permease/ATPase                                                                              | 0.0067  | 0.8469 |
| JW5243 | ydeN | putative Ser-type periplasmic non-aryl sulfatase                                                                                | -0.0264 | 0.3733 |
| JW5244 | yneL | pseudogene, AraC family                                                                                                         | -0.0261 | 0.4031 |
| JW5245 | yneE | bestrophin family putative inner membrane protein                                                                               | -0.0869 | 0.0091 |
| JW5247 | yneI | succinate semialdehyde dehydrogenase, NAD(P)+-dependent                                                                         | -0.0189 | 0.6386 |
| JW5248 | marR | transcriptional repressor of multiple antibiotic resistance                                                                     | -0.1747 | 0.1078 |
| JW5249 | marA | multiple antibiotic resistance transcriptional regulator                                                                        | -0.0505 | 0.1239 |
| JW5250 | eamA | cysteine and O-acetyl-L-serine efflux system                                                                                    | -0.0355 | 0.4769 |
| JW5251 | ynfO | uncharacterized protein, Qin prophage                                                                                           | 0.0049  | 0.8099 |
| JW5252 | ydfO | Qin prophage; DUF1398 family protein                                                                                            | 0.0589  | 0.1680 |
| JW5253 | gnsB | Qin prophage; multicopy suppressor of secG(Cs) and fabA6(Ts)                                                                    | -0.0035 | 0.9136 |
| JW5254 | ynfN | Qin prophage; cold shock-induced protein                                                                                        | -0.0305 | 0.1762 |
| JW5255 | essQ | Qin prophage; putative S lysis protein                                                                                          | -0.0149 | 0.6161 |
| JW5257 | ynfP | Uncharacterized protein                                                                                                         | 0.0240  | 0.1444 |
| JW5258 | ynfC | UPF0257 family lipoprotein                                                                                                      | 0.0390  | 0.1212 |
| JW5259 | ynfD | DUF1161 family periplasmic protein                                                                                              | -0.0760 | 0.0082 |
| JW5260 | ynfF | S- and N-oxide reductase, A subunit, periplasmic                                                                                | -0.0328 | 0.2491 |
| JW5261 | ynfH | oxidoreductase, membrane subunit                                                                                                | -0.0466 | 0.1272 |
| JW5262 | dmsD | twin-arginine leader-binding protein for DmsA and TorA                                                                          | 0.0199  | 0.3363 |
| JW5263 | clcB | H(+)/Cl(-) exchange transporter                                                                                                 | 0.1045  | 0.0317 |
| JW5264 | ynfK | putative dethiobiotin synthetase                                                                                                | -0.0056 | 0.8722 |
| JW5265 | ydgJ | putative oxidoreductase                                                                                                         | 0.0097  | 0.7088 |
| JW5267 | slyA | global transcriptional regulator                                                                                                | 0.0182  | 0.5344 |
| JW5270 | ydhO | murein DD-endopeptidase, space-maker hydrolase                                                                                  | 0.0659  | 0.0713 |
| JW5271 | ydhX | putative 4Fe-4S ferridoxin-type protein; FNR, Nar, NarP-regulated protein; putative subunit of YdhYVWXUT oxidoreductase complex | -0.0746 | 0.0018 |
| JW5272 | ydhV | putative oxidoreductase subunit                                                                                                 | 0.0012  | 0.9583 |
| JW5273 | sufB | component of SufBCD Fe-S cluster assembly scaffold                                                                              | 0.0138  | 0.6961 |
| JW5274 | ydiN | putative MFS transporter, membrane protein                                                                                      | 0.0490  | 0.1924 |
| JW5275 | ydiO | putative acyl-CoA dehydrogenase                                                                                                 | 0.0127  | 0.6945 |
| JW5276 | ydiQ | putative electron transfer flavoprotein subunit                                                                                 | 0.0147  | 0.5750 |

|        |      |                                                                   |         |        |
|--------|------|-------------------------------------------------------------------|---------|--------|
| JW5278 | arpB | Putative ankyrin repeat protein B                                 | -0.0432 | 0.0939 |
| JW5280 | pfkB | 6-phosphofructokinase II                                          | 0.1007  | 0.0331 |
| JW5281 | ydjM | inner membrane protein regulated by LexA                          | -0.0646 | 0.0337 |
| JW5282 | astD | succinylglutamic semialdehyde dehydrogenase                       | -0.0432 | 0.1093 |
| JW5283 | ydjY | putative ferredoxin-like lipoprotein                              | 0.0100  | 0.5072 |
| JW5284 | ynjB | putative ABC transporter periplasmic binding protein              | 0.1042  | 0.0009 |
| JW5285 | ynjC | putative ABC transporter permease                                 | 0.0031  | 0.9408 |
| JW5286 | ynjD | putative ABC transporter ATPase                                   | -0.0209 | 0.1053 |
| JW5287 | ynjE | molybdopterin synthase sulfurtransferase                          | 0.0312  | 0.2507 |
| JW5288 | ynjI | inner membrane protein                                            | -0.0171 | 0.5898 |
| JW5289 | ydjH | putative kinase                                                   | 0.0231  | 0.1769 |
| JW5290 | ydjK | putative MFS sugar transporter, membrane protein                  | -0.0204 | 0.4307 |
| JW5291 | yeaJ | putative diguanylate cyclase                                      | 0.0304  | 0.1910 |
| JW5292 | yeaP | diguanylate cyclase                                               | -0.1216 | 0.2061 |
| JW5293 | yeaV | putative transporter                                              | -0.0025 | 0.9125 |
| JW5294 | yeaW | putative YeaWX dioxygenase alpha subunit; 2Fe-2S cluster          | 0.0504  | 0.0573 |
| JW5295 | yoaB | putative reactive intermediate deaminase                          | 0.0762  | 0.0233 |
| JW5296 | yoaC | DUF1889 family protein                                            | 0.0735  | 0.0996 |
| JW5298 | yobH | uncharacterized protein                                           | -0.0192 | 0.5233 |
| JW5299 | yebQ | putative transporter                                              | 0.0478  | 0.0136 |
| JW5301 | yebU | 16S rRNA m(5)C1407 methyltransferase, SAM-dependent               | -0.0547 | 0.3241 |
| JW5302 | yebV | uncharacterized protein                                           | 0.1027  | 0.0177 |
| JW5303 | yebW | uncharacterized protein                                           | 0.0397  | 0.1855 |
| JW5304 | yebA | murein DD-endopeptidase, space-maker hydrolase, septation protein | 0.0945  | 0.0106 |
| JW5306 | yebB | DUF830 family protein                                             | -0.0274 | 0.2396 |
| JW5307 | yecD | isochorismatase family protein                                    | 0.0101  | 0.7617 |
| JW5308 | yecN | MAPEG family inner membrane protein                               | 0.0958  | 0.1384 |
| JW5309 | yecM | putative metal-binding enzyme                                     | -0.0880 | 0.0519 |
| JW5310 | yecT | uncharacterized protein                                           | 0.0493  | 0.2194 |
| JW5312 | otsA | trehalose-6-phosphate synthase                                    | -0.0658 | 0.0057 |
| JW5313 | yedO | D-cysteine desulfhydrase, PLP-dependent                           | -0.0373 | 0.1651 |
| JW5316 | fliO | flagellar biosynthesis protein                                    | 0.0061  | 0.8593 |
| JW5317 | yodD | uncharacterized protein                                           | -0.0121 | 0.6134 |
| JW5319 | yedS | Putative outer membrane protein                                   | 0.0554  | 0.0915 |
| JW5322 | yedW | response regulator family protein                                 | 0.0032  | 0.8316 |
| JW5323 | yodB | cytochrome b561 homolog                                           | -0.0202 | 0.6119 |
| JW5325 | yeeL | Uncharacterized protein                                           | -0.0375 | 0.1061 |
| JW5326 | yoeA | CP4-44 prophage; putative disrupted hemin or colicin receptor     | 0.0997  | 0.0074 |

|        |      |                                                                                              |         |        |
|--------|------|----------------------------------------------------------------------------------------------|---------|--------|
| JW5327 | yeeP | pseudogene, CP4-44 prophage; 50S ribosome-binding GTPase family                              | -0.0339 | 0.5977 |
| JW5328 | yoeF | pseudogene, CP4-44 putative prophage remnant                                                 | -0.0411 | 0.1085 |
| JW5329 | dacD | D-alanyl-D-alanine carboxypeptidase; penicillin-binding protein 6b                           | -0.0007 | 0.3284 |
| JW5330 | yeeF | putrescine importer, low affinity                                                            | 0.0365  | 0.0789 |
| JW5331 | yoeB | toxin of the YoeB-YefM toxin-antitoxin system                                                | 0.0161  | 0.5484 |
| JW5335 | nudD | GDP-mannose mannosyl hydrolase                                                               | 0.1329  | 0.0066 |
| JW5336 | yegH | inner membrane protein                                                                       | 0.0930  | 0.0009 |
| JW5338 | mdtA | multidrug efflux system, subunit A                                                           | 0.0724  | 0.0128 |
| JW5339 | yegP | UPF0339 family protein                                                                       | 0.0432  | 0.1519 |
| JW5340 | gatR | Putative galactitol utilization operon repressor                                             | -0.0022 | 0.9404 |
| JW5343 | gatY | D-tagatose 1,6-bisphosphate aldolase 2, catalytic subunit                                    | 0.0369  | 0.2834 |
| JW5344 | fbaB | fructose-bisphosphate aldolase class I                                                       | 0.0115  | 0.6414 |
| JW5345 | yegX | putative family 25 glycosyl hydrolase                                                        | 0.1111  | 0.0685 |
| JW5346 | yohN | periplasmic modulator of Ni and Co efflux                                                    | 0.0185  | 0.5114 |
| JW5349 | yehL | putative hexameric AAA+ MoxR family ATPase                                                   | 0.0026  | 0.8971 |
| JW5350 | yehP | VMA domain putative YehL ATPase stimulator                                                   | -0.0092 | 0.7783 |
| JW5351 | yehR | lipoprotein, DUF1307 family                                                                  | -0.0473 | 0.0595 |
| JW5352 | yehT | response regulator inducing btsT; two-component system BtsSR                                 | -0.0511 | 0.0409 |
| JW5353 | yehU | sensory kinase regulating btsT; two-component system BtsSR                                   | 0.0335  | 0.3169 |
| JW5354 | yohO | putative membrane protein                                                                    | -0.0086 | 0.8038 |
| JW5355 | pbpG | D-alanyl-D-alanine endopeptidase                                                             | 0.0349  | 0.2605 |
| JW5356 | yohC | Yip1 family inner membrane protein                                                           | -0.0943 | 0.0095 |
| JW5358 | yohH | Putative multidrug resistance outer membrane protein                                         | 0.1486  | 0.0060 |
| JW5359 | yeiS | DUF2542 family protein                                                                       | 0.0170  | 0.4653 |
| JW5361 | yeiW | UPF0153 cysteine cluster protein                                                             | 0.0316  | 0.3930 |
| JW5362 | yeiP | elongation factor P-like protein                                                             | 0.0215  | 0.4822 |
| JW5363 | bcr  | bicyclomycin/cysteine/sulfonamide efflux transporter                                         | 0.0865  | 0.0069 |
| JW5366 | ccmA | heme export ABC transporter ATPase                                                           | 0.0017  | 0.9197 |
| JW5367 | napB | nitrate reductase, small, cytochrome C550 subunit, periplasmic                               | -0.0351 | 0.2542 |
| JW5368 | yojL | putative thiamine-synthetic flavin transferase lipoprotein                                   | 0.1042  | 0.0003 |
| JW5371 | yfaZ | outer membrane protein, putative porin                                                       | -0.0292 | 0.3094 |
| JW5372 | yfbE | uridine 5'-(beta-1-threo-pentapyranosyl-4-ulose diphosphate) aminotransferase, PLP-dependent | 0.0404  | 0.0840 |
| JW5373 | yfbJ | undecaprenyl phosphate-alpha-L-ara4N exporter; flippase ArnEF subunit                        | -0.2217 | 0.0271 |
| JW5374 | menD | 2-succinyl-5-enolpyruvyl-6-hydroxy-3-cyclohexene-1-carboxylate synthase; SEPHCHC synthase    | 0.0567  | 0.0002 |

|        |      |                                                                                                                  |         |        |
|--------|------|------------------------------------------------------------------------------------------------------------------|---------|--------|
| JW5375 | nuoC | NADH:ubiquinone oxidoreductase, fused CD subunit                                                                 | 0.0684  | 0.0839 |
| JW5376 | yfbT | hexitol phosphatase A                                                                                            | 0.0760  | 0.1512 |
| JW5377 | yfcE | phosphodiesterase activity on bis-pNPP                                                                           | 0.0639  | 0.1053 |
| JW5378 | dedD | membrane-anchored periplasmic protein involved in septation                                                      | -0.0098 | 0.7069 |
| JW5380 | trmC | fused 5-methylaminomethyl-2-thiouridine-forming enzyme methyltransferase and FAD-dependent demodification enzyme | -0.0206 | 0.2516 |
| JW5381 | yfcM | Elongation Factor P Lys34 hydroxylase                                                                            | 0.0656  | 0.0002 |
| JW5382 | yfdI | serotype-specific glucosyl transferase, CPS-53 (KpLE1) prophage                                                  | 0.0122  | 0.6715 |
| JW5383 | tfaS | pseudogene, CPS-53 (KpLE1) prophage; tail fiber assembly protein fragment                                        | -0.0743 | 0.0054 |
| JW5384 | yfdL | pseudogene, CPS-53 (KpLE1) prophage                                                                              | -0.0241 | 0.3398 |
| JW5385 | yfdN | CPS-53 (KpLE1) prophage; uncharacterized protein                                                                 | 0.0461  | 0.0711 |
| JW5386 | ypdJ | exonase remnant                                                                                                  | 0.0464  | 0.2894 |
| JW5387 | torI | response regulator inhibitor for tor operon                                                                      | 0.0014  | 0.9634 |
| JW5388 | ypdA | sensor kinase regulating yhjX; pyruvate-responsive YpdAB two-component system                                    | 0.0002  | 0.9953 |
| JW5389 | ypdH | putative enzyme IIB component of PTS                                                                             | 0.0604  | 0.0466 |
| JW5391 | yfeA | putative diguanylate cyclase                                                                                     | -0.0253 | 0.6536 |
| JW5394 | ucpA | furfural resistance protein, putative short-chain oxidoreductase                                                 | -0.0703 | 0.0167 |
| JW5395 | yfeW | penicillin binding protein PBP4B; weak DD-carboxypeptidase activity                                              | -0.0289 | 0.3660 |
| JW5396 | ypfH | palmitoyl-CoA esterase activity, uncertain physiological substrate                                               | -0.0643 | 0.0511 |
| JW5397 | hda  | ATPase regulatory factor involved in DnaA inactivation                                                           | 0.0431  | 0.0575 |
| JW5399 | yfgG | uncharacterized protein                                                                                          | -0.0209 | 0.3589 |
| JW5400 | yfgH | outer membrane integrity lipoprotein                                                                             | -0.0688 | 0.0009 |
| JW5401 | guaB | IMP dehydrogenase                                                                                                | 0.0470  | 0.0221 |
| JW5402 | yfgJ | DUF1407 family protein                                                                                           | 0.0276  | 0.4687 |
| JW5404 | sseB | rhodanase-like enzyme, sulfur transfer from thiosulfate                                                          | 0.0854  | 0.0080 |
| JW5405 | yphG | DUF4380 domain-containing TPR repeat protein                                                                     | -0.0260 | 0.2867 |
| JW5406 | yphH | putative DNA-binding transcriptional regulator                                                                   | 0.0524  | 0.0576 |
| JW5407 | yfhK | sensor protein kinase regulating glmY sRNA in two-component system with response regulator GlrR                  | -0.0064 | 0.8736 |

|        |      |                                                                              |         |        |
|--------|------|------------------------------------------------------------------------------|---------|--------|
| JW5408 | yfhB | phosphatidylglycerophosphatase C,<br>membrane bound                          | -0.1043 | 0.0558 |
| JW5409 | yfiP | DTW domain protein                                                           | -0.0187 | 0.5942 |
| JW5412 | yfiL | lipoprotein                                                                  | -0.1560 | 0.0062 |
| JW5413 | rimM | ribosome maturation factor                                                   | -0.1516 | 0.1170 |
| JW5415 | yfjD | UPF0053 family inner membrane protein                                        | 0.0299  | 0.3190 |
| JW5416 | recN | recombination and repair protein                                             | -0.1163 | 0.2096 |
| JW5418 | yfjO | CP4-57 prophage; uncharacterized protein                                     | -0.0117 | 0.5092 |
| JW5419 | yfjP | CP4-57 prophage; 50S ribosome-binding<br>GTPase family protein               | -0.3229 | 0.0029 |
| JW5420 | ypjM | Uncharacterized protein                                                      | -0.3206 | 0.0018 |
| JW5421 | ypjJ | uncharacterized protein                                                      | 0.0239  | 0.4463 |
| JW5422 | ypjA | adhesin-like autotransporter                                                 | -0.0321 | 0.1231 |
| JW5423 | pinH | pseudogene, invertase resolvase family                                       | -0.0605 | 0.6168 |
| JW5424 | ypjC | Putative uncharacterized protein                                             | 0.0186  | 0.1310 |
| JW5425 | ygaQ | uncharacterized protein                                                      | -0.0591 | 0.0383 |
| JW5426 | yqaC | Putative uncharacterized protein                                             | -0.0023 | 0.9307 |
| JW5427 | ygaT | carbon starvation protein                                                    | 0.0751  | 0.0852 |
| JW5428 | ygaY | Putative uncharacterized transporter                                         | 0.0325  | 0.1144 |
| JW5429 | srlA | glucitol/sorbitol-specific enzyme IIC<br>component of PTS                    | 0.0515  | 0.1193 |
| JW5430 | srlE | glucitol/sorbitol-specific enzyme IIB<br>component of PTS                    | -0.0240 | 0.2883 |
| JW5431 | gutQ | D-arabinose 5-phosphate isomerase                                            | 0.0010  | 0.9796 |
| JW5433 | hypF | carbamoyl phosphate phosphatase and<br>[NiFe] hydrogenase maturation protein | 0.2252  | 0.0304 |
| JW5434 | ascG | asc operon transcriptional repressor; prpBC<br>operon repressor              | -0.0725 | 0.0970 |
| JW5435 | ascF | cellobiose/arbutin/salicin-specific PTS<br>enzymes, IIB and IC components    | 0.0718  | 0.0157 |
| JW5437 | rpoS | RNA polymerase, sigma S (sigma 38) factor                                    | 0.1366  | 0.1004 |
| JW5438 | ygbF | CRISPR adaptation ssRNA endonuclease                                         | 0.0467  | 0.2823 |
| JW5440 | ygcQ | putative flavoprotein                                                        | -0.0619 | 0.0075 |
| JW5441 | ygcR | putative flavoprotein                                                        | 0.0163  | 0.5764 |
| JW5442 | ygcU | putative FAD-linked oxidoreductase                                           | 0.0189  | 0.3152 |
| JW5443 | ygcW | putative SDR family oxidoreductase                                           | 0.0531  | 0.0942 |
| JW5444 | ygcE | putative kinase                                                              | -0.0612 | 0.0872 |
| JW5445 | ygcG | TPM domain protein, putative phosphatase                                     | 0.0227  | 0.5970 |
| JW5446 | exo  | Ssb-binding protein, misidentified as ExoIX                                  | -0.0082 | 0.7353 |
| JW5448 | ygdI | DUF903 family verified lipoprotein                                           | 0.0203  | 0.1536 |
| JW5449 | amiC | N-acetylmuramoyl-L-alanine amidase                                           | -0.0571 | 0.0783 |
| JW5450 | ygdB | DUF2509 family protein                                                       | 0.0972  | 0.1469 |
| JW5451 | ppdB | putative prepilin peptidase-dependent<br>protein                             | -0.2422 | 0.0008 |
| JW5453 | yqeF | short chain acyltransferase                                                  | -0.0338 | 0.1312 |

|        |      |                                                                                             |         |        |
|--------|------|---------------------------------------------------------------------------------------------|---------|--------|
| JW5454 | yqeH | putative LuxR family transcriptional regulator                                              | -0.0453 | 0.5483 |
| JW5455 | yqeJ | uncharacterized protein                                                                     | 0.1201  | 0.2291 |
| JW5456 | yqeI | uncharacterized protein                                                                     | -0.0081 | 0.7619 |
| JW5457 | pbl  | pseudogene, peptidoglycan-binding enzyme family                                             | 0.0851  | 0.0239 |
| JW5458 | yqeK | pseudogene, response regulator family, part of T3SS PAI ETT2 remnant                        | -0.0288 | 0.3507 |
| JW5459 | yqeM | pseudogene, orgB family, part of T3SS PAI ETT2 remnant                                      | -0.0032 | 0.9006 |
| JW5460 | yqeN | Putative uncharacterized protein                                                            | 0.1041  | 0.0081 |
| JW5461 | yqeQ | Putative uncharacterized protein                                                            | -0.1064 | 0.2156 |
| JW5462 | xdhA | xanthine dehydrogenase, molybdenum binding subunit                                          | 0.0042  | 0.9034 |
| JW5463 | yqeW | putative carbamoyltransferase                                                               | 0.0201  | 0.3243 |
| JW5464 | yqeC | putative selenium-dependent hydroxylase accessory protein                                   | -0.0137 | 0.6744 |
| JW5466 | guaD | guanine deaminase                                                                           | -0.0225 | 0.7195 |
| JW5467 | ygfQ | guanine/hypoxanthine permease, high affinity; guanine/hypoxanthine:H <sup>+</sup> symporter | 0.0285  | 0.3104 |
| JW5468 | ygfS | putative 4Fe-4S ferredoxin-type oxidoreductase subunit                                      | -0.3040 | 0.0409 |
| JW5469 | ygfT | putative oxidoreductase, Fe-S subunit/nucleotide-binding subunit                            | 0.0303  | 0.4949 |
| JW5470 | ygfU | uric acid permease                                                                          | 0.0604  | 0.1304 |
| JW5473 | ygfB | UPF0149 family protein                                                                      | 0.0483  | 0.3214 |
| JW5475 | rpiA | ribose 5-phosphate isomerase, constitutive                                                  | -0.2374 | 0.0004 |
| JW5476 | ygfI | putative DNA-binding transcriptional regulator                                              | 0.0717  | 0.1962 |
| JW5477 | yggP | putative Zn-binding dehydrogenase                                                           | -0.0497 | 0.0022 |
| JW5478 | tktA | transketolase 1, thiamine triphosphate-binding                                              | 0.0287  | 0.3457 |
| JW5479 | yggU | UPF0235 family protein                                                                      | -0.0038 | 0.8720 |
| JW5481 | mltC | membrane-bound lytic murein transglycosylase C                                              | -0.0641 | 0.3801 |
| JW5482 | speC | ornithine decarboxylase, constitutive                                                       | -0.0469 | 0.0861 |
| JW5484 | yghF | pseudogene, secretion pathway protein, C-type protein homology                              | -0.0213 | 0.5749 |
| JW5486 | glcF | glycolate oxidase 4Fe-4S iron-sulfur cluster subunit                                        | 0.0314  | 0.4073 |
| JW5487 | glcE | glycolate oxidase FAD binding subunit                                                       | 0.1546  | 0.0006 |
| JW5490 | yghQ | putative inner membrane polysaccharide flippase                                             | -0.0544 | 0.1414 |
| JW5491 | yghS | putative ATP-binding protein                                                                | -0.0754 | 0.0007 |
| JW5492 | yghU | putative S-transferase                                                                      | -0.0720 | 0.0281 |
| JW5493 | hybF | protein involved with the maturation of hydrogenases 1 and 2                                | 0.0535  | 0.0613 |
| JW5494 | hybB | putative hydrogenase 2 cytochrome b type component                                          | 0.0172  | 0.6778 |
| JW5496 | yghY | Putative hydrolase                                                                          | -0.0798 | 0.0059 |

|        |      |                                                                                                                         |         |        |
|--------|------|-------------------------------------------------------------------------------------------------------------------------|---------|--------|
| JW5499 | dkgA | 2,5-diketo-D-gluconate reductase A                                                                                      | -0.0267 | 0.3680 |
| JW5500 | yqhG | DUF3828 family putative periplasmic protein                                                                             | -0.0715 | 0.0006 |
| JW5501 | ygiQ | Radical SAM superfamily protein                                                                                         | -0.1169 | 0.0525 |
| JW5503 | tolC | transport channel                                                                                                       | -0.3114 | 0.0001 |
| JW5505 | yqiC | accessory factor for ubiquinone biosynthesis; BMFP family putative fusogenic protein                                    | -0.0691 | 0.1752 |
| JW5507 | yqiG | pseudogene; fimbrial export usher family                                                                                | 0.0955  | 0.0498 |
| JW5508 | yqiH | putative periplasmic pilin chaperone                                                                                    | -0.0004 | 0.9881 |
| JW5509 | yqiI | fimbrial protein                                                                                                        | 0.0932  | 0.0119 |
| JW5510 | ygiG | putrescine:2-oxoglutaric acid aminotransferase, PLP-dependent                                                           | -0.0168 | 0.5399 |
| JW5511 | ebgA | evolved beta-D-galactosidase, alpha subunit                                                                             | -0.0112 | 0.7531 |
| JW5512 | ygiI | putative transporter                                                                                                    | -0.0787 | 0.0883 |
| JW5513 | ygiO | 23S rRNA m(2)G1835 methyltransferase, SAM-dependent                                                                     | 0.0095  | 0.6173 |
| JW5514 | ygiP | UTP pyrophosphatase                                                                                                     | 0.0196  | 0.5034 |
| JW5515 | alx  | putative membrane-bound redox modulator                                                                                 | 0.0012  | 0.9553 |
| JW5516 | yqiC | DUF1090 family putative periplasmic protein                                                                             | 0.0113  | 0.5496 |
| JW5517 | yhaL | uncharacterized protein                                                                                                 | -0.3011 | 0.0332 |
| JW5518 | yhaM | putative L-serine dehydratase alpha chain                                                                               | 0.0363  | 0.3805 |
| JW5519 | yhaO | putative transporter                                                                                                    | 0.0762  | 0.0114 |
| JW5520 | tdcG | L-serine dehydratase 3, anaerobic                                                                                       | -0.0583 | 0.6687 |
| JW5522 | tdcE | pyruvate formate-lyase 4/2-ketobutyrate formate-lyase                                                                   | 0.0722  | 0.0372 |
| JW5525 | tdcR | L-threonine dehydratase operon activator protein                                                                        | 0.0457  | 0.0153 |
| JW5526 | garR | tartronate semialdehyde reductase                                                                                       | -0.0253 | 0.3779 |
| JW5527 | agaA | pseudogene, N-acetylgalactosamine-6-phosphate deacetylase fragment                                                      | 0.1078  | 0.0375 |
| JW5528 | yraR | putative nucleoside-diphosphate-sugar epimerase                                                                         | 0.0084  | 0.7850 |
| JW5529 | yhbO | stress-resistance protein                                                                                               | 0.0347  | 0.5038 |
| JW5531 | deaD | ATP-dependent RNA helicase                                                                                              | -0.1240 | 0.0463 |
| JW5533 | yhbC | ribosome maturation factor for 30S subunits                                                                             | -0.0190 | 0.3594 |
| JW5534 | yhbX | putative EptAB family phosphoethanolamine transferase, inner membrane protein                                           | -0.0948 | 0.0164 |
| JW5536 | arcB | aerobic respiration control sensor histidine protein kinase, cognate to two-component response regulators ArcA and RssB | -0.1866 | 0.0022 |
| JW5538 | nanK | N-acetylmannosamine kinase                                                                                              | 0.0182  | 0.5321 |
| JW5539 | yhcB | DUF1043 family inner membrane-anchored protein                                                                          | 0.0352  | 0.4570 |
| JW5540 | yhcN | cadmium and peroxide resistance protein, stress-induced                                                                 | -0.0099 | 0.7509 |
| JW5541 | aaeX | DUF1656 family putative inner membrane efflux pump associated protein                                                   | -0.0175 | 0.5399 |
| JW5542 | yhdP | DUF3971-AsmA2 domains protein                                                                                           | 0.1117  | 0.0781 |

|        |      |                                                                                     |         |        |
|--------|------|-------------------------------------------------------------------------------------|---------|--------|
| JW5543 | yhdJ | DNA adenine methyltransferase, SAM-dependent                                        | 0.0532  | 0.0067 |
| JW5544 | yhdX | putative amino acid ABC transporter permease                                        | 0.0625  | 0.0279 |
| JW5545 | yhdY | putative amino acid ABC transporter permease                                        | 0.0419  | 0.2707 |
| JW5546 | zraP | Zn-dependent periplasmic chaperone                                                  | 0.0443  | 0.0220 |
| JW5547 | nfi  | endonuclease V; deoxyinosine 3' endonuclease                                        | 0.0098  | 0.6998 |
| JW5548 | nudC | NADH pyrophosphatase                                                                | -0.0297 | 0.3372 |
| JW5549 | thiG | thiamine biosynthesis ThiGH complex subunit                                         | 0.0839  | 0.0811 |
| JW5551 | sthA | pyridine nucleotide transhydrogenase, soluble                                       | -0.0684 | 0.0048 |
| JW5553 | argB | acetylglutamate kinase                                                              | -0.0047 | 0.9025 |
| JW5555 | ptsA | putative PTS enzyme: Hpr, enzyme I and II components                                | -0.0160 | 0.5630 |
| JW5556 | gldA | glycerol dehydrogenase, NAD+ dependent; 1,2-propanediol:NAD+ oxidoreductase         | 0.0145  | 0.6244 |
| JW5557 | yijE | EamA-like transporter family protein                                                | 0.0229  | 0.4675 |
| JW5558 | cpxP | inhibitor of the cpx response; periplasmic adaptor protein                          | -0.0946 | 0.0101 |
| JW5559 | yiiM | 6-N-hydroxylaminopurine resistance protein                                          | -0.0227 | 0.3341 |
| JW5560 | kdgT | 2-keto-3-deoxy-D-gluconate transporter                                              | 0.0537  | 0.0622 |
| JW5562 | frvB | putative PTS enzyme, IIB component/IIC component                                    | 0.0270  | 0.4563 |
| JW5563 | yiiF | putative thymol sensitivity protein, CopG family putative transcriptional regulator | 0.3471  | 0.0154 |
| JW5566 | yihX | alpha-D-glucose-1-phosphate phosphatase, anomer-specific                            | 0.0175  | 0.6971 |
| JW5567 | yihW | putative transcriptional regulator for sulphoquinovose utilization                  | -0.0312 | 0.1580 |
| JW5568 | yihV | 6-deoxy-6-sulphofructose kinase                                                     | 0.0168  | 0.4207 |
| JW5569 | yihS | sulphoquinovose isomerase                                                           | 0.0244  | 0.5116 |
| JW5571 | bipA | GTP-binding protein                                                                 | 0.0306  | 0.4736 |
| JW5574 | yihF | DUF945 family protein                                                               | 0.0637  | 0.1105 |
| JW5575 | mobB | molybdopterin-guanine dinucleotide biosynthesis protein B                           | 0.1380  | 0.0206 |
| JW5576 | trkH | potassium transporter                                                               | -0.1565 | 0.0000 |
| JW5577 | yigZ | UPF0029 family protein                                                              | -0.2134 | 0.1372 |
| JW5578 | fadA | 3-ketoacyl-CoA thiolase (thiolase I)                                                | -0.0824 | 0.2975 |
| JW5580 | tatB | TatABCE protein translocation system subunit                                        | -0.1520 | 0.0789 |



|        |      |                                                                                                              |         |        |
|--------|------|--------------------------------------------------------------------------------------------------------------|---------|--------|
| JW5581 | ubiE | bifunctional 2-octaprenyl-6-methoxy-1,4-benzoquinone methylase/ S-adenosylmethionine:2-DMK methyltransferase | -0.4016 | 0.0033 |
| JW5584 | pldB | lysophospholipase L2                                                                                         | 0.0005  | 0.9907 |
| JW5585 | rhtB | homoserine, homoserine lactone and S-methyl-methionine efflux pump                                           | 0.0022  | 0.8995 |
| JW5586 | rhtC | threonine efflux pump                                                                                        | 0.0084  | 0.7208 |
| JW5588 | yigI | 4HBT thioesterase family protein                                                                             | 0.0312  | 0.3436 |
| JW5589 | rarD | putative chloramphenicol resistance permease                                                                 | 0.0233  | 0.5546 |
| JW5590 | yigG | PRK11371 family inner membrane protein                                                                       | 0.1327  | 0.0025 |
| JW5591 | yigE | DUF2233 family protein                                                                                       | 0.0768  | 0.0996 |
| JW5592 | dapF | diaminopimelate epimerase                                                                                    | 0.0801  | 0.6660 |
| JW5594 | aslB | putative AslA-specific sulfatase-maturing enzyme                                                             | 0.0821  | 0.0235 |
| JW5595 | yifK | putative APC family amino acid transporter                                                                   | 0.1584  | 0.0003 |
| JW5596 | rffT | TDP-Fuc4NAc:lipidII Fuc4NAc transferase                                                                      | 0.0326  | 0.4719 |
| JW5597 | rffC | TDP-fucosamine acetyltransferase                                                                             | 0.1092  | 0.0488 |
| JW5598 | rffG | dTDP-glucose 4,6-dehydratase                                                                                 | -0.0876 | 0.0471 |
| JW5599 | rffD | UDP-N-acetyl-D-mannosaminuronic acid dehydrogenase                                                           | 0.1000  | 0.0073 |
| JW5600 | rffE | UDP-N-acetyl glucosamine-2-epimerase                                                                         | 0.1464  | 0.0016 |
| JW5601 | wzzE | Entobacterial Common Antigen (ECA) polysaccharide chain length modulation protein                            | 0.0329  | 0.5230 |
| JW5603 | gpp  | guanosine pentaphosphatase/exopolyphosphatase                                                                | 0.0085  | 0.6410 |
| JW5604 | rep  | DNA helicase and single-stranded DNA-dependent ATPase                                                        | -0.1013 | 0.0135 |
| JW5605 | ilvD | dihydroxyacid dehydratase                                                                                    | -0.0506 | 0.1600 |
| JW5606 | ilvE | branched-chain amino acid aminotransferase                                                                   | 0.0396  | 0.5013 |
| JW5607 | hdhR | flhDC operon transcriptional repressor                                                                       | 0.0184  | 0.6055 |
| JW5608 | yieP | putative transcriptional regulator                                                                           | -0.0018 | 0.9432 |
| JW5609 | trkD | potassium transporter                                                                                        | 0.0584  | 0.2979 |
| JW5610 | yieM | stimulator of RavA ATPase activity; von Willebrand factor domain protein                                     | 0.0122  | 0.3900 |
| JW5611 | atpI | ATP synthase, membrane-bound accessory factor                                                                | 0.0337  | 0.3883 |
| JW5612 | yieL | putative xylanase                                                                                            | -0.0323 | 0.2880 |
| JW5613 | yieK | putative 6-phosphogluconolactonase                                                                           | 0.0110  | 0.8021 |
| JW5619 | tnaB | Low affinity tryptophan permease                                                                             | -0.0344 | 0.0710 |
| JW5627 | dgoR | D-galactonate catabolism operon transcriptional repressor                                                    | -0.0145 | 0.5661 |
| JW5628 | dgoA | 2-oxo-3-deoxygalactonate 6-phosphate aldolase                                                                | 0.0031  | 0.8922 |

|        |      |                                                                               |         |        |
|--------|------|-------------------------------------------------------------------------------|---------|--------|
| JW5629 | dgoD | D-galactonate dehydratase                                                     | -0.0484 | 0.2120 |
| JW5631 | cbrA | colicin M resistance protein; FAD-binding protein, putative oxidoreductase    | 0.0321  | 0.4539 |
| JW5633 | yidQ | DUF1375 family outer membrane protein                                         | 0.0315  | 0.4684 |
| JW5634 | emrD | multidrug efflux system protein                                               | -0.0110 | 0.6725 |
| JW5636 | yicO | adenine permease, high affinity; adenine:H <sup>+</sup> symporter             | 0.0094  | 0.7385 |
| JW5637 | yicN | DUF1198 family protein                                                        | -0.0912 | 0.0342 |
| JW5641 | ttk  | nucleoid occlusion factor, anti-FtsZ division inhibitor                       | 0.1079  | 0.1461 |
| JW5643 | yicR | UPF0758 family protein                                                        | -0.3016 | 0.0207 |
| JW5644 | htrL | YibB family protein, function unknown                                         | 0.0862  | 0.2592 |
| JW5645 | yibQ | putative polysaccharide deacetylase                                           | 0.1587  | 0.0070 |
| JW5646 | envC | activator of AmiB,C murein hydrolases, septal ring factor                     | 0.0800  | 0.0047 |
| JW5648 | yaY  | L-threonine dehydrogenase                                                     | 0.0145  | 0.7127 |
| JW5650 | sgbU | putative L-xylulose 5-phosphate 3-epimerase                                   | -0.0578 | 0.0941 |
| JW5651 | yaN  | 2,3-diketo-L-gulonate TRAP transporter large permease protein                 | -0.5407 | 0.0007 |
| JW5652 | avtA | valine-pyruvate aminotransferase; transaminase C; alanine-valine transaminase | -0.3646 | 0.0463 |
| JW5653 | bax  | putative glucosaminidase                                                      | -0.0457 | 0.5934 |
| JW5654 | yaB  | YiaAB family inner membrane protein                                           | -0.5678 | 0.0004 |
| JW5655 | yaF  | barrier effect co-colonization resistance factor; DUF3053 family lipoprotein  | -0.0349 | 0.1831 |
| JW5656 | tiaE | glyoxylate/hydroxypyruvate reductase B                                        | -0.0654 | 0.0001 |
| JW5657 | yaD  | multicopy suppressor of bamB; outer membrane lipoprotein                      | 0.1067  | 0.0606 |
| JW5659 | yhjY | autotransporter beta-domain protein                                           | -0.0456 | 0.0667 |
| JW5660 | eptB | KDO phosphoethanolamine transferase, Ca(2+)-inducible                         | -0.0247 | 0.3512 |
| JW5663 | bcsF | DUF2636 family cellulose production small membrane protein                    | -0.3208 | 0.0052 |
| JW5665 | bcsA | cellulose synthase, catalytic subunit                                         | -0.0449 | 0.0971 |
| JW5668 | kdgK | 2-dehydro-3-deoxygluconokinase                                                | 0.0630  | 0.0344 |
| JW5669 | hdeB | acid-resistance protein                                                       | -0.0341 | 0.4263 |
| JW5670 | yhiD | putative Mg(2+) transport ATPase, inner membrane protein                      | 0.1055  | 0.1865 |
| JW5672 | yhiQ | 16S rRNA m(2)G1516 methyltransferase, SAM-dependent                           | 0.0764  | 0.0129 |
| JW5674 | yhiK | pseudogene, DUF4049 family protein                                            | 0.0246  | 0.1983 |
| JW5676 | rbbA | ribosome-associated ATPase: ATP-binding protein/ATP-binding membrane protein  | -0.0314 | 0.2496 |
| JW5677 | yhhJ | putative ABC transporter permease                                             | 0.0948  | 0.0755 |
| JW5678 | yrhC | pseudogene fragment                                                           | 0.0428  | 0.2978 |

|        |      |                                                                                                   |         |        |
|--------|------|---------------------------------------------------------------------------------------------------|---------|--------|
| JW5679 | rhsB | Rhs protein with DUF4329 family putative toxin domain; putative neighboring cell growth inhibitor | 0.1704  | 0.0000 |
| JW5680 | yhhT | UPF0118 family putative transporter                                                               | -0.0032 | 0.2945 |
| JW5682 | dcrB | putative lipoprotein                                                                              | -0.0928 | 0.0126 |
| JW5683 | yhhL | DUF1145 family protein                                                                            | -0.0244 | 0.1366 |
| JW5686 | gntU | gluconate transporter, low affinity GNT 1 system                                                  | 0.0434  | 0.0550 |
| JW5687 | glpG | rhomboid intramembrane serine protease                                                            | -0.0437 | 0.0197 |
| JW5688 | rtcA | RNA 3'-terminal phosphate cyclase                                                                 | -0.1279 | 0.0067 |
| JW5689 | malP | maltodextrin phosphorylase                                                                        | -0.1404 | 0.3027 |
| JW5690 | gntT | gluconate transporter, high-affinity GNT I system                                                 | 0.1140  | 0.0160 |
| JW5691 | gntX | DNA catabolic protein                                                                             | -0.1110 | 0.0006 |
| JW5692 | hslO | heat shock protein Hsp33                                                                          | 0.0839  | 0.0304 |
| JW5693 | yrfD | DNA catabolic putative pilus assembly protein                                                     | -0.1613 | 0.0106 |
| JW5694 | yrfA | DNA catabolic protein                                                                             | -0.1083 | 0.0236 |
| JW5696 | yhfY | PRD domain protein                                                                                | 0.0233  | 0.3289 |
| JW5697 | yhfU | DUF2620 family protein                                                                            | 0.0951  | 0.0068 |
| JW5698 | frlR | putative DNA-binding transcriptional regulator                                                    | -0.0381 | 0.1158 |
| JW5699 | frlC | fructoselysine 3-epimerase                                                                        | -0.1066 | 0.0540 |
| JW5700 | frlB | fructoselysine-6-P-deglycase                                                                      | 0.0363  | 0.0415 |
| JW5701 | yhfK | putative transporter, FUSC superfamily inner membrane protein                                     | 0.0320  | 0.5297 |
| JW5702 | crp  | cAMP-activated global transcription factor, mediator of catabolite repression                     | 0.3845  | 0.0000 |
| JW5703 | yheO | putative PAS domain-containing DNA-binding transcriptional regulator                              | 0.0657  | 0.0551 |
| JW5704 | gspM | general secretory pathway component, cryptic                                                      | -0.0894 | 0.0476 |
| JW5705 | gspL | general secretory pathway component, cryptic                                                      | -0.0252 | 0.6453 |
| JW5706 | gspI | general secretory pathway component, cryptic                                                      | -0.0495 | 0.1081 |
| JW5707 | gspD | general secretory pathway component, cryptic                                                      | 0.0181  | 0.7329 |
| JW5708 | smf  | DNA recombination-mediator A family protein                                                       | 0.0825  | 0.0224 |
| JW5710 | yrdA | bacterial transferase hexapeptide domain protein                                                  | -0.1904 | 0.0076 |
| JW5711 | yjbF | extracellular polysaccharide production lipoprotein                                               | 0.0015  | 0.9594 |
| JW5713 | ubiC | chorismate--pyruvate lyase                                                                        | -0.0412 | 0.1819 |
| JW5714 | zur  | transcriptional repressor, Zn(II)-binding                                                         | -0.0701 | 0.1865 |
| JW5716 | yjbO | phage shock protein G                                                                             | 0.0117  | 0.7080 |
| JW5718 | yjbB | putative inner membrane protein                                                                   | -0.0071 | 0.7672 |

|        |      |                                                                                         |         |        |
|--------|------|-----------------------------------------------------------------------------------------|---------|--------|
| JW5721 | yjcS | putative alkylsulfatase; SDS catabolic enzyme                                           | -0.0144 | 0.4810 |
| JW5727 | phnK | carbon-phosphorus lyase complex subunit, putative ATP transporter ATP-binding protein   | 0.0135  | 0.7384 |
| JW5729 | yjcZ | YjcZ family protein; yjhH motility defect suppressor                                    | -0.0549 | 0.1108 |
| JW5731 | adiA | arginine decarboxylase                                                                  | 0.0027  | 0.9316 |
| JW5733 | yjdC | putative transcriptional regulator                                                      | 0.2375  | 0.1931 |
| JW5734 | dipZ | thiol:disulfide interchange protein and activator of DsbC                               | 0.0001  | 0.9975 |
| JW5735 | dcuA | C4-dicarboxylate antiporter                                                             | -0.0154 | 0.7296 |
| JW5736 | yjeI | DUF4156 family lipoprotein                                                              | 0.0430  | 0.2790 |
| JW5737 | ecnA | entericidin A membrane lipoprotein, antidote entericidin B                              | -0.0983 | 0.1309 |
| JW5738 | sugE | multidrug efflux system protein                                                         | 0.1011  | 0.0169 |
| JW5739 | yjeM | putative transporter                                                                    | 0.0184  | 0.5007 |
| JW5741 | mrn  | exoribonuclease R, RNase R                                                              | 0.0093  | 0.7329 |
| JW5742 | yjfN | DUF1471 family periplasmic protein                                                      | 0.0414  | 0.1117 |
| JW5743 | yjfO | biofilm peroxide resistance protein                                                     | -0.0180 | 0.5782 |
| JW5744 | ulaA | L-ascorbate-specific enzyme IIC permease component of PTS                               | -0.3299 | 0.0373 |
| JW5745 | ytfB | OapA family protein                                                                     | 0.1105  | 0.0187 |
| JW5746 | fkfB | FKBP-type peptidyl-prolyl cis-trans isomerase (rotamase)                                | -0.0519 | 0.0377 |
| JW5747 | ytfH | DUF24 family HxlR-type putative transcriptional regulator                               | -0.0181 | 0.3724 |
| JW5748 | ytfI | uncharacterized protein                                                                 | -0.0254 | 0.0504 |
| JW5749 | ytfK | DUF1107 family protein                                                                  | 0.0084  | 0.6646 |
| JW5752 | ytfR | putative sugar ABC transporter ATPase                                                   | 0.0217  | 0.2434 |
| JW5753 | ytfT | putative sugar ABC transporter permease                                                 | 0.0622  | 0.0594 |
| JW5754 | yjfF | putative sugar ABC transporter permease                                                 | 0.0314  | 0.1452 |
| JW5755 | yjgF | enamine/imine deaminase, reaction intermediate detoxification                           | 0.0782  | 0.0248 |
| JW5756 | yjgK | biofilm modulator regulated by toxins; DUF386 family protein, cupin superfamily protein | -0.1295 | 0.2563 |
| JW5757 | yjgL | SopA-central-domain-like hexapeptide repeat protein                                     | -0.0593 | 0.0000 |
| JW5758 | yjgM | GNAT family putative N-acetyltransferase                                                | -0.0354 | 0.1181 |
| JW5759 | yjgN | DUF898 family inner membrane protein                                                    | -0.0780 | 0.0244 |
| JW5761 | yjgB | broad specificity NADPH-dependent aldehyde reductase, Zn-containing                     | -0.0643 | 0.0975 |
| JW5763 | yjgX | Putative uncharacterized protein                                                        | 0.0251  | 0.0248 |
| JW5768 | yjhB | putative MFS transporter, membrane protein                                              | -0.0012 | 0.9650 |
| JW5769 | yjhC | GFO/IDH/MOCA family putative oxidoreductase. NAD(P)-dependent                           | -0.0147 | 0.6820 |
| JW5770 | yjhD | pseudogene, KpLE2 phage-like element                                                    | -0.0464 | 0.1011 |

|        |      |                                                                                                                               |         |        |
|--------|------|-------------------------------------------------------------------------------------------------------------------------------|---------|--------|
| JW5775 | yjhH | putative lyase/synthase                                                                                                       | 0.0254  | 0.2832 |
| JW5776 | sgcX | putative endoglucanase with Zn-dependent exopeptidase domain                                                                  | -0.0912 | 0.3162 |
| JW5778 | yjhA | N-acetylnuraminic acid outer membrane channel protein                                                                         | -0.0141 | 0.5272 |
| JW5780 | fimD | fimbrial usher outer membrane porin protein; FimCD chaperone-usher                                                            | 0.0390  | 0.2233 |
| JW5782 | yjiD | RpoS stabilizer after DNA damage, anti-RssB factor                                                                            | -0.0268 | 0.1607 |
| JW5783 | yjiH | nucleoside recognition pore and gate family putative inner membrane transporter                                               | -0.0151 | 0.5530 |
| JW5784 | kptA | RNA 2'-phosphotransferase                                                                                                     | 0.0814  | 0.0806 |
| JW5785 | yjiL | putative ATPase, activator of (R)-hydroxyglutaryl-CoA dehydratase                                                             | 0.0114  | 0.4175 |
| JW5786 | yjiM | putative 2-hydroxyglutaryl-CoA dehydratase                                                                                    | -0.0083 | 0.7120 |
| JW5787 | yjiT | pseudogene                                                                                                                    | -0.0801 | 0.0770 |
| JW5789 | mcrC | 5-methylcytosine-specific restriction enzyme McrBC, subunit McrC                                                              | -0.0312 | 0.0617 |
| JW5790 | yjiA | metal-binding GTPase                                                                                                          | -0.1145 | 0.0893 |
| JW5791 | yjiY | pyruvate/H <sup>+</sup> symporter                                                                                             | 0.0455  | 0.2774 |
| JW5792 | yjjM | putative transcriptional activator for L-galactonate catabolism                                                               | -0.0490 | 0.0867 |
| JW5793 | yjjN | L-galactonate oxidoreductase; L-gulonate oxidoreductase                                                                       | -0.0336 | 0.2662 |
| JW5794 | mdoB | OPG periplasmic biosynthetic phosphoglycerol transferases I (membrane-bound) and II (soluble);                                | -0.0202 | 0.2769 |
| JW5795 | yjjA | putative DUF2501 family periplasmic protein                                                                                   | 0.0013  | 0.9553 |
| JW5796 | yjjP | DUF1212 family inner membrane protein                                                                                         | -0.0569 | 0.0040 |
| JW5797 | yjjZ | uncharacterized protein                                                                                                       | -0.0191 | 0.3313 |
| JW5800 | nadR | trifunctional protein: nicotinamide mononucleotide adenylyltransferase, ribosylnicotinamide kinase, transcriptional repressor | -0.0171 | 0.3059 |
| JW5801 | yjjX | non-canonical purine NTP phosphatase, ITPase/XTPase                                                                           | -0.0646 | 0.0185 |
| JW5802 | ydbA | Putative exported protein                                                                                                     | -0.0054 | 0.7344 |
| JW5803 | ybhR | putative ABC transporter permease                                                                                             | -0.0007 | 0.9765 |
| JW5804 | ycjY | S9 homolog non-peptidase family protein                                                                                       | -0.0825 | 0.0045 |
| JW5805 | hyfI | hydrogenase 4, Fe-S subunit                                                                                                   | 0.0249  | 0.1958 |
| JW5806 | tdcD | propionate kinase/acetate kinase C, anaerobic                                                                                 | -0.0520 | 0.1258 |
| JW5807 | leuB | 3-isopropylmalate dehydrogenase, NAD(+)-dependent                                                                             | 0.2662  | 0.1347 |
| JW5808 | pcnB | poly(A) polymerase                                                                                                            | -0.0322 | 0.2740 |

|        |      |                                                                         |         |        |
|--------|------|-------------------------------------------------------------------------|---------|--------|
| JW5811 | fhiA | pseudogene, flagellar system protein, promoterless fragment             | -0.0169 | 0.4112 |
| JW5812 | mbhA | pseudogene, lateral flagellar motor protein fragment                    | 0.0215  | 0.4055 |
| JW5813 | ykfC | CP4-6 prophage; conserved protein                                       | 0.0529  | 0.0449 |
| JW5814 | yaiF | Putative uncharacterized acetyltransferase                              | 0.0752  | 0.0790 |
| JW5815 | tfaD | pseudogene, DLP12 prophage; tail fiber assembly protein family          | -0.0596 | 0.0027 |
| JW5816 | ybfE | LexA-regulated protein, CopB family                                     | 0.0136  | 0.6181 |
| JW5818 | potG | putrescine ABC transporter ATPase                                       | 0.0155  | 0.7125 |
| JW5819 | ybjS | putative NAD(P)H-dependent oxidoreductase                               | 0.0298  | 0.3020 |
| JW5820 | ycfS | L,D-transpeptidase linking Lpp to murein                                | -0.0250 | 0.2730 |
| JW5821 | emtA | lytic murein endotransglycosylase E                                     | 0.1286  | 0.2482 |
| JW5822 | abgT | p-aminobenzoyl-glutamate transporter; membrane protein                  | 0.1082  | 0.0030 |
| JW5823 | ycdH | DUF465 family protein                                                   | 0.0647  | 0.0035 |
| JW5825 | yneF | putative membrane-bound diguanylate cyclase                             | -0.1791 | 0.1795 |
| JW5826 | asr  | acid shock-inducible periplasmic protein                                | 0.0172  | 0.5746 |
| JW5827 | ydhL | DUF1289 family protein                                                  | 0.0364  | 0.2496 |
| JW5830 | yebN | putative Mn(2+) efflux pump, mntR-regulated                             | -0.0894 | 0.0192 |
| JW5831 | znuA | zinc ABC transporter periplasmic binding protein                        | 0.0334  | 0.1746 |
| JW5832 | yedQ | putative membrane-anchored diguanylate cyclase                          | 0.0155  | 0.4204 |
| JW5833 | yeeJ | putative adhesin                                                        | 0.0350  | 0.4685 |
| JW5834 | yeeY | LysR family putative transcriptional regulator                          | -0.0408 | 0.0803 |
| JW5836 | cld  | regulator of length of O-antigen component of lipopolysaccharide chains | 0.0541  | 0.0005 |
| JW5837 | yegR | uncharacterized protein                                                 | 0.1053  | 0.0004 |
| JW5838 | yohG | pseudogene                                                              | 0.0583  | 0.0889 |
| JW5839 | yejO | pseudogene, autotransporter outer membrane homology                     | 0.1468  | 0.0870 |
| JW5840 | elaD | protease, capable of cleaving an AMC-ubiquitin model substrate          | -0.0031 | 0.9001 |
| JW5841 | prmB | N5-glutamine methyltransferase                                          | 0.0774  | 0.0078 |
| JW5842 | yphC | putative Zn-dependent NAD(P)-binding oxidoreductase                     | 0.0340  | 0.1862 |
| JW5843 | norR | anaerobic nitric oxide reductase DNA-binding transcriptional activator  | 0.0250  | 0.1759 |
| JW5844 | yglI | CRISP RNA (crRNA) containing Cascade antiviral complex protein          | -0.0456 | 0.0264 |
| JW5845 | ygcS | putative MFS sugar transporter; membrane protein                        | 0.0122  | 0.6614 |
| JW5846 | ygeO | pseudogene, orgA family, part of T3SS PAI ETT2 remnant                  | 0.2286  | 0.0326 |
| JW5847 | prfB | peptide chain release factor RF-2                                       | 0.0000  | 0.9987 |
| JW5848 | yghO | pseudogene, IS-interrupted                                              | -0.0172 | 0.5254 |

|        |      |                                                                                                                      |         |        |
|--------|------|----------------------------------------------------------------------------------------------------------------------|---------|--------|
| JW5849 | yqhC | transcriptional activator of yqhD                                                                                    | 0.0964  | 0.0052 |
| JW5850 | yqjF | putative quinol oxidase subunit,<br>trinitrotoluene-inducible                                                        | 0.0147  | 0.6593 |
| JW5851 | pnp  | polynucleotide<br>phosphorylase/polyadenylase                                                                        | 0.1194  | 0.1587 |
| JW5852 | yihO | putative sulphoquinovose importer                                                                                    | 0.0228  | 0.3611 |
| JW5853 | ysgA | putative carboxymethylenebutenolidase                                                                                | -0.1316 | 0.0000 |
| JW5854 | yigL | pyridoxal phosphate phosphatase                                                                                      | 0.1698  | 0.0200 |
| JW5855 | recQ | ATP-dependent DNA helicase                                                                                           | 0.0307  | 0.3250 |
| JW5856 | trxA | thioredoxin 1                                                                                                        | -0.0225 | 0.6552 |
| JW5857 | rbsD | D-ribose pyranase                                                                                                    | 0.0452  | 0.0111 |
| JW5858 | yidX | putative lipoprotein                                                                                                 | 0.0493  | 0.0065 |
| JW5859 | dgoT | D-galactonate transporter                                                                                            | 0.0385  | 0.1873 |
| JW5860 | yidR | DUF3748 family protein                                                                                               | 0.0491  | 0.0251 |
| JW5864 | yrhA | pseudogene, interrupted by IS1E                                                                                      | 0.1836  | 0.0493 |
| JW5865 | yrfG | GMP/IMP nucleotidase                                                                                                 | -0.1370 | 0.0190 |
| JW5867 | aidB | DNA alkylation damage repair protein;<br>flavin-containing DNA binding protein,<br>weak isovaleryl CoA dehydrogenase | -0.0345 | 0.3218 |
| JW5868 | ulaG | L-ascorbate 6-phosphate lactonase                                                                                    | -0.1606 | 0.0009 |
| JW5869 | yjiK | SdiA-regulated family putative membrane-<br>anchored protein; putative phytase-like<br>esterase                      | -0.0780 | 0.0020 |
| JW5871 | mcrB | 5-methylcytosine-specific restriction enzyme<br>McrBC, subunit McrB                                                  | 0.0107  | 0.7455 |
| JW5873 | prfC | peptide chain release factor RF-3                                                                                    | -0.2528 | 0.0001 |
| JW5874 | ydhM | transcriptional repressor for the nemRA-<br>gloA operon, quinone-, glyoxal-, and HOCl-<br>activated                  | -0.0379 | 0.0659 |
| JW5875 | nuoB | NADH:ubiquinone oxidoreductase, chain B                                                                              | 0.0376  | 0.6168 |
| JW5876 | yfeH | putative inorganic ion transporter                                                                                   | -0.0013 | 0.9565 |
| JW5877 | ypeB | DUF3820 family protein                                                                                               | -0.0205 | 0.5002 |
| JW5878 | csiE | stationary phase inducible protein                                                                                   | -0.0258 | 0.5026 |
| JW5892 | yadB | glutamyl-Q tRNA(Asp) synthetase                                                                                      | 0.1507  | 0.0001 |
| JW5893 | yahH | Putative uncharacterized protein                                                                                     | 0.0136  | 0.4643 |
| JW5894 | cynR | transcriptional activator of cyn operon;<br>autorepressor                                                            | -0.0142 | 0.5430 |
| JW5896 | ybhD | putative DNA-binding transcriptional<br>regulator                                                                    | -0.0469 | 0.2426 |
| JW5897 | yliA | glutathione ABC transporter ATPase                                                                                   | -0.0619 | 0.0836 |
| JW5898 | yccW | 23S rRNA m(5)C1962 methyltransferase,<br>SAM-dependent                                                               | -0.0067 | 0.6558 |
| JW5901 | ycgH | Putative uncharacterized protein                                                                                     | 0.1068  | 0.0001 |
| JW5904 | lomR | Putative protein                                                                                                     | -0.0382 | 0.1484 |
| JW5905 | hrpA | putative ATP-dependent helicase                                                                                      | 0.0003  | 0.9898 |
| JW5906 | gapC | Putative uncharacterized protein                                                                                     | 0.0606  | 0.0173 |
| JW5907 | yncB | curcumin/dihydrocurcumin reductase,<br>NADPH-dependent                                                               | 0.0449  | 0.4444 |
| JW5908 | yddM | putative DNA-binding transcriptional<br>regulator                                                                    | 0.0268  | 0.1366 |
| JW5909 | ydfU | Qin prophage; DUF968 family protein                                                                                  | 0.0563  | 0.0040 |
| JW5911 | yniD | uncharacterized protein                                                                                              | -0.0337 | 0.1759 |
| JW5912 | yedN | Putative uncharacterized protein                                                                                     | -0.0869 | 0.2602 |

|        |      |                                                                              |         |        |
|--------|------|------------------------------------------------------------------------------|---------|--------|
| JW5913 | intG | pseudogene, phage integrase family                                           | 0.0192  | 0.4039 |
| JW5916 | molR | Putative molybdate metabolism regulator                                      | -0.0664 | 0.0866 |
| JW5917 | rcsC | Sensor histidine kinase                                                      | -0.0013 | 0.9515 |
| JW5921 | yfjS | CP4-57 prophage; uncharacterized protein                                     | -0.0656 | 0.0013 |
| JW5922 | ypjL | pseudogene, CP4-57 prophage                                                  | -0.0968 | 0.0005 |
| JW5923 | ygfK | putative Fe-S subunit oxidoreductase subunit                                 | -0.0002 | 0.9922 |
| JW5924 | yghE | pseudogene, secretion pathway protein, L-type protein homology               | -0.0162 | 0.5097 |
| JW5925 | yghJ | putative secreted and surface-associated lipoprotein mucinase                | -0.0672 | 0.0705 |
| JW5926 | yghX | pseudogene, dienlactone hydrolase family                                     | -0.0205 | 0.5517 |
| JW5927 | ygiB | DUF1190 family protein                                                       | 0.0562  | 0.1170 |
| JW5929 | yiiE | CopG family putative transcriptional regulator                               | 0.0281  | 0.2486 |
| JW5931 | tatD | quality control of Tat-exported FeS proteins; Mg-dependent cytoplasmic DNase | -0.0110 | 0.7802 |
| JW5937 | ysdC | Aminopeptidase                                                               | 0.0347  | 0.2289 |
| JW5938 | yicM | putative transporter                                                         | -0.0213 | 0.3948 |
| JW5939 | yicJ | putative transporter                                                         | -0.0413 | 0.0793 |
| JW5940 | bisC | biotin sulfoxide reductase                                                   | 0.0272  | 0.1274 |
| JW5941 | yhjQ | involved in cellulose production, minD superfamily (pseudogene)              | -0.0600 | 0.0152 |
| JW5942 | bcsC | cellulose synthase subunit                                                   | 0.0006  | 0.9802 |
| JW5943 | yhjK | cyclic-di-GMP phosphodiesterase                                              | 0.0162  | 0.5665 |
| JW5944 | yhiM | acid resistance protein, inner membrane                                      | -0.0245 | 0.3521 |
| JW5945 | yhhS | putative arabinose efflux transporter                                        | 0.0882  | 0.1100 |
| JW5946 | gntR | d-gluconate inducible gluconate regulon transcriptional repressor            | 0.0293  | 0.3912 |
| JW5948 | yhfZ | putative DNA-binding transcriptional regulator                               | -0.0628 | 0.1027 |
| JW5949 | yrdD | ssDNA-binding protein, function unknown                                      | -0.0136 | 0.6731 |
| JW5950 | yjbN | tRNA-dihydrouridine synthase A                                               | 0.1172  | 0.0094 |
| JW5952 | yjhU | putative DNA-binding transcriptional regulator; KpLE2 phage-like element     | -0.0382 | 0.1061 |
| JW5953 | yjiP | pseudogene, transposase_31 family protein                                    | 0.0301  | 0.4481 |
| JW5954 | yjiV | Putative uncharacterized protein                                             | 0.0616  | 0.0472 |
| JW5955 | bglJ | bgl operon transcriptional activator                                         | -0.0649 | 0.0015 |
| JW5956 | ykfH | uncharacterized protein                                                      | -0.0173 | 0.4882 |
| JW5960 | ymjC | pseudogene                                                                   | -0.0299 | 0.0821 |
| JW5961 | yncK | Putative uncharacterized protein                                             | 0.0010  | 0.0198 |
| JW5962 | sra  | stationary-phase-induced ribosome-associated protein                         | -0.0319 | 0.1366 |
| JW5963 | blr  | beta-lactam resistance membrane protein; divisome-associated protein         | -0.0269 | 0.2911 |
| JW5964 | ypaA | pseudogene, C-terminal fragment, Transposase_31 family                       | 0.0222  | 0.7147 |
| JW5965 | yicS | putative periplasmic protein                                                 | 0.0421  | 0.0744 |
| JW5967 | sgcB | putative enzyme IIB component of PTS                                         | 0.0481  | 0.0098 |
| JW5968 | yjhX | UPF0386 family protein                                                       | -0.1472 | 0.1475 |

<sup>1</sup> Function determined from UniportKB

<sup>2</sup> Each individual score represents the mean of 12 trials – three biological and four technical.

<sup>3</sup> The *p*-value was a two-tailed *t*-test and significance was determined using the Benjamini-Hochberg procedure
